# Supplementary material for: Copper-catalyzed multiple oxidation and cycloaddition of aryl–alkyl ketones (alcohols) for the synthesis of 4-acyl- and 4-diketo-1,2,3-triazoles
Source: Royal Society of Chemistry journal article supplement (doi:10.1039/d1cc06477k), 2022-01-01

*Supporting Information*

**Copper-Catalyzed Multiple Oxidation and Cycloaddition of Aryl-  
Alkyl Ketones (Alcohols) for Synthesis of 4-Acyl- and 4-Diketo-1,2,3-  
Triazoles**

Liangfeng Huang,<sup>‡a</sup> Lei Zheng,<sup>‡b</sup> Zhongzhen Zhou,<sup>\*b</sup> and Yunfeng Chen<sup>\*a</sup>

<sup>a</sup>School of Chemistry and Environmental Engineering, Wuhan Institute of Technology, Wuhan 430073, China. E-mail: yfchen@wit.edu.cn;

<sup>b</sup>Department of Neuropharmacology and Novel Drug Discovery, School of Pharmaceutical Sciences, Southern Medical University, Guangzhou 510515, China. E-mail: zhouzz@smu.edu.cn;

*Table of Contents*

|                                                                     |    |
|---------------------------------------------------------------------|----|
| 1. General information .....                                        | 2  |
| 2. Optimization of the Reaction Conditions .....                    | 3  |
| 3. Experimental Procedures .....                                    | 10 |
| 4. Control experiment .....                                         | 14 |
| 5. Analytical Data for acyl-1,2,3-triazoles .....                   | 17 |
| 6. References .....                                                 | 38 |
| 7. <sup>1</sup> H and <sup>13</sup> C NMR spectra of products ..... | 38 |

## 1. General information

All reactions were carried out in 10 mL or 25 mL round-bottom flasks with air condensers. Unless otherwise stated, all chemicals used in the experiments were obtained from commercial sources and used directly without further treatment. TLC was performed with the detection of compounds with UV light. Flash column chromatography purification of the products was accomplished on silica gel (200–300 mesh), petroleum ether (PE) (60–90 °C) and ethyl acetate (EA) were used as eluents for silica gel chromatography. Melting points for all solid products were measured on an X-4A melting point apparatus without correction.  $^1\text{H}$  and  $^{13}\text{C}$  NMR spectra were recorded at 22 °C on a Bruker AV 400 and 100 MHz spectrometers with tetramethylsilane (TMS) as an internal standard.  $^1\text{H}$  and  $^{13}\text{C}$  chemical shifts in NMR spectra were referenced relative to signals of  $\text{CDCl}_3$  ( $\delta$  7.26 ppm for  $^1\text{H}$  and 77.0 ppm for  $^{13}\text{C}$ ). High-resolution mass spectra (HRMS) were acquired on Waters Acquity UPLC Class I/Xevo G2Q-TOF.

## 2. Optimization of the Reaction Conditions

### 2.1 synthesis of 4-acyl-1,2,3-triazoles

Table S1. Optimized copper salts and ligands

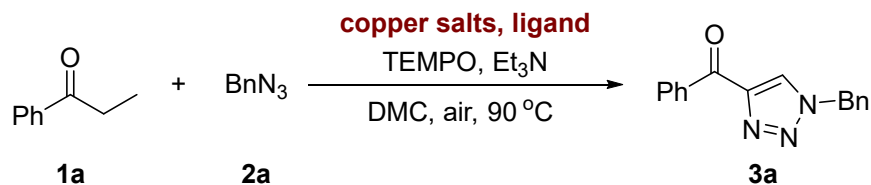

| entry     | copper salts<br>(10 mol %)             | ligand<br>(15 mol %)   | yield      |
|-----------|----------------------------------------|------------------------|------------|
| 1         | -                                      | -                      | 0          |
| 2         | CuBr                                   | -                      | 48%        |
| 3         | Cu <sub>2</sub> O                      | -                      | 15%        |
| 4         | CuBr <sub>2</sub>                      | -                      | 50%        |
| 5         | CuCl                                   | -                      | 45%        |
| 6         | Cu(OAc) <sub>2</sub> ·H <sub>2</sub> O | -                      | 60%        |
| 7         | CuI                                    | -                      | 17%        |
| 8         | Cu(acac) <sub>2</sub>                  | -                      | 0%         |
| 9         | Cu(NO <sub>3</sub> ) <sub>2</sub>      | -                      | 0%         |
| 10        | Cu(OTf) <sub>2</sub>                   | -                      | 64%        |
| <b>11</b> | <b>Cu(OTf)<sub>2</sub></b>             | <b>2,2'-bipyridine</b> | <b>95%</b> |
| 12        | Cu(OTf) <sub>2</sub>                   | PPh <sub>3</sub>       | 91%        |
| 13        | Cu(OTf) <sub>2</sub>                   | L-Proline              | 93%        |
| 14        | Cu(OTf) <sub>2</sub>                   | 1,10-phen              | 89%        |

<sup>a</sup>Reaction conditions: **1a** (0.4 mmol, 1.0 equiv), **2a** (0.6 mmol, 1.5 equiv), copper salt (0.04 mmol, 10 mol%), ligand (0.06 mmol, 0.15 equiv), TEMPO (0.12 mmol, 0.3 equiv) and Et<sub>3</sub>N (0.16 mmol, 0.4 equiv) in DMC (1 mL) under air atmosphere at 90 °C for 12 h. <sup>b</sup>Isolated yields based on **1a**.

**Table S2. Optimized solvent**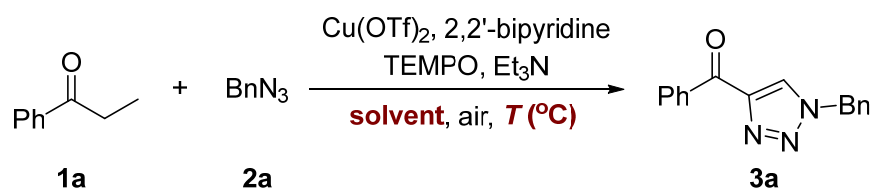

| entry    | solvent            | T (°C)    | yield      |
|----------|--------------------|-----------|------------|
| <b>1</b> | toluene            | 90        | 89%        |
| 2        | DMSO               | 90        | 0%         |
| 3        | DMF                | 90        | 0%         |
| <b>4</b> | <b>DMC</b>         | <b>90</b> | <b>95%</b> |
| 5        | DMA                | 90        | 3%         |
| 6        | CH <sub>3</sub> CN | 80        | 61%        |
| 7        | 1,4-dioxane        | 90        | 0%         |
| 8        | THF                | 80        | 34%        |
| 9        | H <sub>2</sub> O   | 90        | 19%        |

<sup>a</sup>Reaction conditions: **1a** (0.4 mmol, 1.0 equiv), **2a** (0.6 mmol, 1.5 equiv), Cu(OTf)<sub>2</sub> (0.04 mmol, 10 mol%), 2,2'-bipyridine (0.06 mmol, 0.15 equiv), TEMPO (0.12 mmol, 0.3 equiv) and Et<sub>3</sub>N (0.16 mmol, 0.4 equiv) in solvent (1 mL) under air atmosphere at 90 °C for 12 h. <sup>b</sup>Isolated yields based on **1a**.

**Table S3. Optimized base**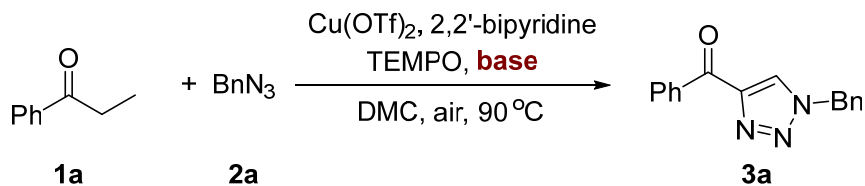

| entry    | solvent                         | yield      |
|----------|---------------------------------|------------|
| <b>1</b> | <b>Et<sub>3</sub>N</b>          | <b>95%</b> |
| 2        | DBU                             | 16%        |
| 3        | TMAOH                           | 12%        |
| 4        | t-BuOK                          | 0%         |
| 5        | K <sub>2</sub> CO <sub>3</sub>  | 19%        |
| 6        | LiOH·H <sub>2</sub> O           | 0%         |
| 7        | NaOH                            | trace      |
| 8        | CS <sub>2</sub> CO <sub>3</sub> | 0%         |
| 9        | DABCO                           | 0%         |

<sup>a</sup>Reaction conditions: **1a** (0.4 mmol, 1.0 equiv), **2a** (0.6 mmol, 1.5 equiv), Cu(OTf)<sub>2</sub> (0.04 mmol, 10 mol%), 2,2'-bipyridine (0.06 mmol, 0.15 equiv), TEMPO (0.12 mmol, 0.3 equiv) and base (0.16 mmol, 0.4 equiv) in DMC (1 mL) under air atmosphere at 90 °C for 12 h. <sup>b</sup>Isolated yields based on **1a**.



**Table S4. Other oxidants**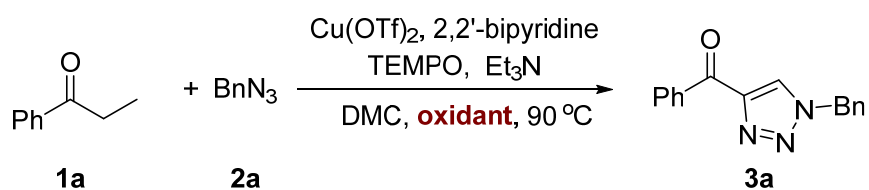

| entry    | oxidant                          | yield      |
|----------|----------------------------------|------------|
| <b>1</b> | <b>Air</b>                       | <b>95%</b> |
| 2        | $\text{N}_2$                     | 0          |
| 3        | $\text{K}_2\text{S}_2\text{O}_8$ | 0%         |
| 4        | DTBP                             | 49%        |
| 5        | Select-flour                     | 0%         |
| 6        | TBHP                             | 51%        |
| 7        | $\text{H}_2\text{O}_2$           | 71%        |

<sup>a</sup>Reaction conditions: **1a** (0.4 mmol, 1.0 equiv), **2a** (0.6 mmol, 1.5 equiv),  $\text{Cu}(\text{OTf})_2$  (0.04 mmol, 10 mol%), 2,2'-bipyridine (0.06 mmol, 0.15 equiv), oxidant (0.8 mmol, 2 equiv), TEMPO (0.12 mmol, 0.3 equiv) and  $\text{Et}_3\text{N}$  (0.16 mmol, 0.4 equiv) in DMC (1 mL) under air atmosphere at  $90\text{ }^\circ\text{C}$  for 12 h. <sup>b</sup>Isolated yields based on **1a**.



## 2.2 synthesis of 1,4-diketotriazole

**Table S6. Optimized solvent and temperature**

| entry     | solvent            | T (°C)     | yield <b>5a/6a</b> |
|-----------|--------------------|------------|--------------------|
| 1         | DMC                | 90         | 93%/<5%            |
| 2         | toluene            | 90         | 80%/13%            |
| 3         | DMSO               | 90         | 0%/0%              |
| 4         | DMF                | 90         | 0%/0%              |
| 5         | DMA                | 90         | 0%/<5%             |
| 6         | CH <sub>3</sub> CN | 80         | 55%/<5%            |
| 7         | 1,4-dioxane        | 90         | 0%/0%              |
| 8         | THF                | 80         | 34%/<5%            |
| 9         | H <sub>2</sub> O   | 90         | 19%/<5%            |
| <b>10</b> | <b>toluene</b>     | <b>100</b> | <b>70%/25%</b>     |
| 11        | toluene            | 120        | 63%/15%            |

<sup>a</sup>Reaction conditions: **1b** (0.34 mmol, 1.0 equiv), **2a** (0.5 mmol, 1.5 equiv), Cu(OTf)<sub>2</sub> (0.034 mmol, 10 mol%), 2,2'-bipyridine (0.068 mmol, 0.2 equiv), TEMPO (0.14 mmol, 0.4 equiv) and Et<sub>3</sub>N (0.16 mmol, 0.4 equiv) in toluene (1 mL) under air atmosphere at 100 °C for 24 h.

<sup>b</sup>Isolated yields based on **1b**.

**Table S7. Optimized ligands**

| entry    | ligand                 | yield <b>5a/6a</b> |
|----------|------------------------|--------------------|
| 1        | -                      | 35%/<5%            |
| 2        | 2,2-bpy                | 70%/25%            |
| <b>3</b> | <b>PPh<sub>3</sub></b> | <b>35%/52%</b>     |
| 4        | L-proline              | 41%/20%            |
| 5        | 1,10- phenanthroline   | 31%/0%             |

<sup>a</sup>Reaction conditions: **1b** (0.34 mmol, 1.0 equiv), **2a** (0.5 mmol, 1.5 equiv), Cu(OTf)<sub>2</sub> (0.034 mmol, 10 mol%), ligand (0.068 mmol, 0.2 equiv), TEMPO (0.14 mmol, 0.4 equiv) and Et<sub>3</sub>N (0.16 mmol, 0.4 equiv) in toluene (1 mL) under air atmosphere at 100 °C for 24 h. <sup>b</sup>Isolated yields based on **1b**.

**Table S8. Optimized base**

| entry    | base                            | yield <b>5a/6a</b> |
|----------|---------------------------------|--------------------|
| 1        | Et <sub>3</sub> N               | 35%/52%            |
| 2        | DBU                             | 13%/<5%            |
| 3        | <i>t</i> BuOK                   | 0%/0%              |
| <b>4</b> | <b>TMAOH</b>                    | <b>&lt;5%/67%</b>  |
| 5        | LiOH·H <sub>2</sub> O           | 0%/0%              |
| 6        | NaOH                            | 0%/0%              |
| 7        | CS <sub>2</sub> CO <sub>3</sub> | 0%/0%              |
| 8        | DABCO                           | <5%/11%            |
| 9        | tetrahydropyrrole               | <5%/<1%            |
| 10       | pyridine                        | <5%/<1%            |

<sup>a</sup>Reaction conditions: **1b** (0.34 mmol, 1.0 equiv), **2a** (0.5 mmol, 1.5 equiv), Cu(OTf)<sub>2</sub> (0.034 mmol, 10 mol%), PPh<sub>3</sub> (0.068 mmol, 0.2 equiv), TEMPO (0.14 mmol, 0.4 equiv) and base (0.16 mmol, 0.4 equiv) in toluene (1 mL) under air atmosphere at 100 °C for 24 h. <sup>b</sup>Isolated yields based on **1b**.

**Table S9. Optimized copper catalyst**

| entry    | Cu catalyst                                          | Yield <b>5a/6a</b> |
|----------|------------------------------------------------------|--------------------|
| <b>1</b> | <b>Cu(OTf)<sub>2</sub></b>                           | <b>&lt;5%/67%</b>  |
| 2        | Cu(OAc) <sub>2</sub> ·H <sub>2</sub> O               | <3%/<3%            |
| 3        | CuI                                                  | <1%/<5%            |
| 4        | CuBr <sub>2</sub>                                    | <5%/50%            |
| 5        | CuCl                                                 | 2%/41%             |
| 6        | CuSO <sub>4</sub>                                    | 2%/53%             |
| 7        | Cu(NO <sub>3</sub> ) <sub>2</sub> ·3H <sub>2</sub> O | 0%/0%              |

<sup>a</sup>Reaction conditions: **1b** (0.34 mmol, 1.0 equiv), **2a** (0.5 mmol, 1.5 equiv), copper salt (0.034 mmol, 10 mol%), PPh<sub>3</sub> (0.068 mmol, 0.2 equiv), TEMPO (0.14 mmol, 0.4 equiv) and TMAOH (25% in methanol, 0.0425 mmol, 0.25 equiv) in toluene (1 mL) under air atmosphere at 100 °C for 24 h. <sup>b</sup>Isolated yields based on **1b**.

**Table S10. Optimized equivalent of the base**

| entyr    | Base loading    | yield of 5a/6a |
|----------|-----------------|----------------|
| 1        | 0.1 eq.         | 11%/71%        |
| 2        | 0.2 eq.         | 9%/83%         |
| <b>3</b> | <b>0.25 eq.</b> | <b>3%/92%</b>  |
| 4        | 0.3 eq.         | 0%/67%         |
| 5        | 0.4 eq.         | 0%/32%         |
| 6        | 0.6 eq.         | 0%/25%         |
| 7        | 0.8 eq.         | 0%/9%          |
| 8        | 1 eq.           | 0%/<1%         |

<sup>a</sup>Reaction conditions: **1b** (0.34 mmol, 1.0 equiv), **2a** (0.5 mmol, 1.5 equiv), Cu(OTf)<sub>2</sub> (0.034 mmol, 10 mol%), PPh<sub>3</sub> (0.068 mmol, 0.2 equiv), TEMPO (0.14 mmol, 0.4 equiv) and TMAOH (25% in methanol, 0.1 - 1 equiv) in toluene (1 mL) under air atmosphere at 100 °C for 24 h.

<sup>b</sup>Isolated yields based on **1b**.

### 3. Experimental Procedures

#### 3.1 Typical procedure for synthesis of 4-acyl-1,2,3-triazoles

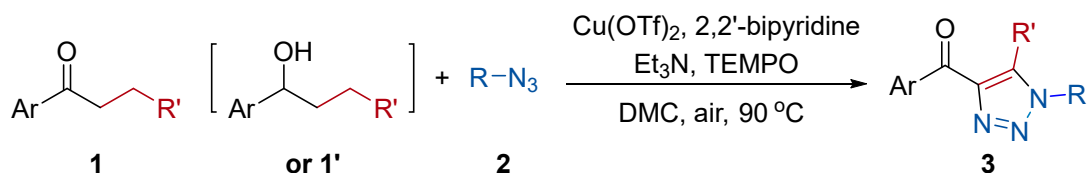

To a solution of ketone **1** (0.4 mmol, 50 mg) and azide **2** (0.6 mmol, 74 mg) in DMC (1 mL) were added  $Cu(OTf)_2$  (0.04 mmol, 10 mol%), 2,2'-bipyridine (0.06 mmol, 6 mg), TEMPO (0.12 mmol, 17.4 mg) and  $Et_3N$  (0.16 mmol, 16 mg); the mixture was stirred at  $90\text{ }^\circ C$  in oil bath under air atmosphere for 16 - 24 h. The reaction was checked by TLC. After completion of the reaction, the mixture was poured into water, extracted by ethyl acetate, and dried with anhydrous  $Na_2SO_4$ . The solvent was removed under reduced pressure to obtain crude product. Further purification by column chromatography on silica gel gave the 4-acyl-1,2,3-triazoles.

#### Large-scale synthesis of **3a**

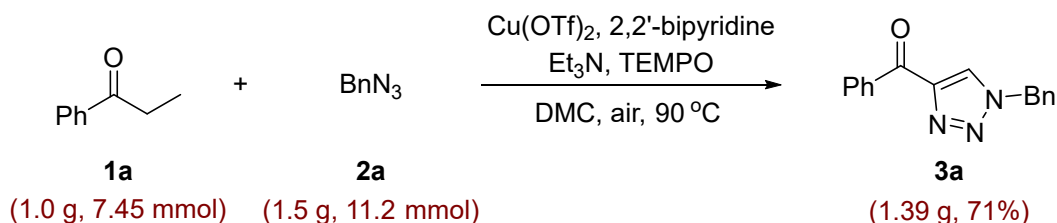

To a solution of ketone **1a** (1 g, 7.45 mmol, 1.0 equiv) and azide **2a** (1.5 g, 11.20 mmol, 1.5 equiv) in DMC (15 mL) were added  $Cu(OTf)_2$  (0.27 g, 0.75 mmol, 10 mol%), 2,2'-bipyridine (0.17 g, 1.1 mmol, 15 mol%), TEMPO (0.35 g, 2.2 mmol, 0.3 equiv) and  $Et_3N$  (0.3 g, 2.98 mmol, 0.4 equiv); the mixture was stirred at  $90\text{ }^\circ C$  in oil bath under air atmosphere for 16 h. The reaction was checked by TLC. After completion of the reaction, the mixture was poured into water, extracted by ethyl acetate, and dried with anhydrous  $Na_2SO_4$ . The solvent was removed under reduced pressure to obtain crude product. Further purification by column chromatography on silica gel gave **3a**.

### 3.2 Typical procedure for synthesis of 1,4-diketotriazole

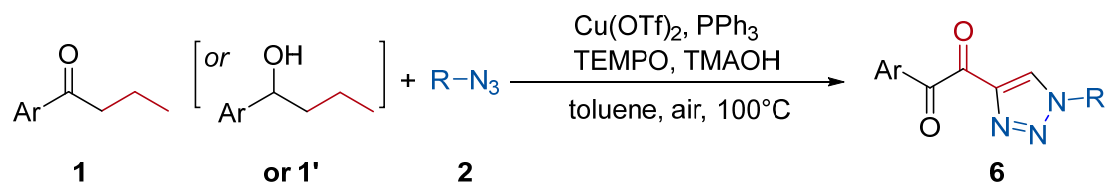

To a solution of ketone **1** (0.34 mmol, 50 mg) and azide **2** (0.5 mmol, 68 mg) in toluene (1 mL) were added Cu(OTf)<sub>2</sub> (0.034 mmol, 10 mol%), PPh<sub>3</sub> (0.068 mmol, 18 mg), TEMPO (0.14 mmol, 22 mg) and TMAOH (25% in methanol, 0.0425 mmol, 15 mg); the mixture was stirred at 100 °C in oil bath under an air atmosphere for 24 h. The reaction was checked by TLC. After completion of the reaction, the mixture was poured into water, extracted by ethyl acetate, and dried with anhydrous Na<sub>2</sub>SO<sub>4</sub>, and then the solvent was removed under reduced pressure to obtain crude product. Further purification by column chromatography on silica gel gave the α,β-diketotriazole.

#### Large-scale synthesis of 6a

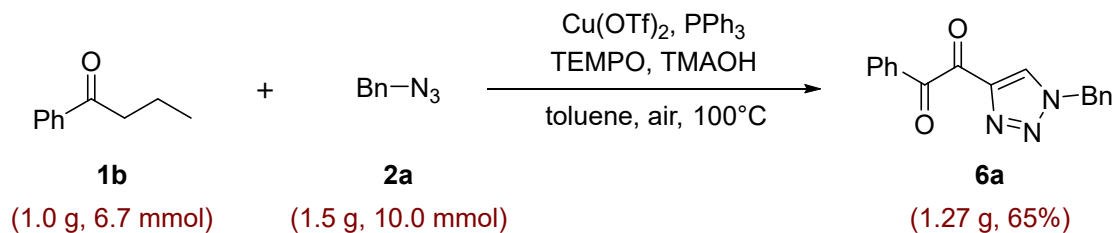

To a solution of ketone **1b** (1.0 g, 6.70 mmol, 1.0 equiv) and azide **2a** (1.3 g, 10.0 mmol, 1.5 equiv) in toluene (20 mL) were added Cu(OTf)<sub>2</sub> (0.24 g, 0.67 mmol, 10 mol%), PPh<sub>3</sub> (0.35 g, 1.34 mmol, 20 mol%), TEMPO (0.42 g, 2.68 mmol, 0.4 equiv) and TMAOH (25% in methanol, 0.6 g, 1.7 mmol, 0.25 equiv); the mixture was stirred at 100 °C in oil bath under an air atmosphere for 24 h. The reaction was checked by TLC. After completion of the reaction, the mixture was poured into water, extracted by ethyl acetate and dried with anhydrous Na<sub>2</sub>SO<sub>4</sub>, and then the solvent was removed under reduced pressure to obtain crude product. Further purification by column chromatography on silica gel gave the **6a**.

### 3.3 Synthesis application

#### 1-(3'-chloro-6-methoxy-[1,1'-biphenyl]-3-yl)propan-1-ol (**1c'**)

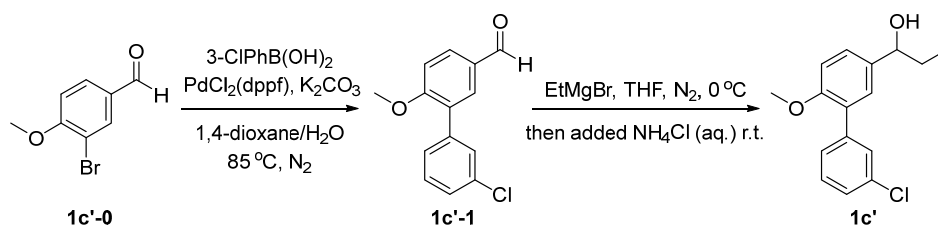

To a solution of 3-bromo-4-methoxybenzaldehyde (**1c'-0**, 108 mg, 0.5 mmol), (3-chlorophenyl)boronic acid (94 mg, 0.6 mmol), PdCl<sub>2</sub>(dppf) (18 mg, 0.025 mmol), K<sub>2</sub>CO<sub>3</sub> (138 mg, 1 mmol) in 1,4-dioxane/H<sub>2</sub>O (v/v = 4:1, 2 mL, 0.25 M) under N<sub>2</sub> at 85 °C for 4 hours. After completion of the reaction, the mixture was diluted with ethyl acetate (15 mL), washed with saturated brine (5 mL for three times), and dried over Na<sub>2</sub>SO<sub>4</sub>. The solvent was removed under vacuum to give **1c'-1** without further purification. <sup>1</sup>H NMR (400 MHz, CDCl<sub>3</sub>): δ 9.92 (s, 1H), 7.87 (d, *J* = 8.4 Hz, 1H), 7.82 (s, 1H), 7.51 (s, 1H), 7.39 – 7.31 (m, 3H), 7.09 (d, *J* = 8.0 Hz, 1H), 3.90 (s, 3H). Spectral data match those previously reported in the literature.<sup>1</sup> Under N<sub>2</sub> atmosphere, a solution of the aldehyde **1c'-1** in THF (2 mL) was added dropwise EtMgBr (1.0 M in THF, 1.05 mL, 1.05 mmol) at 0 °C. The mixture was warmed to room temperature for 2 hours. After completion of the reaction, saturated aqueous NH<sub>4</sub>Cl solution (0.5 mL) was added. The mixture was extracted with EtOAc. The organic layer was then washed with brine and dried over Na<sub>2</sub>SO<sub>4</sub>. The solvent was removed under vacuum and finally purified by silica gel rapid chromatography (Petroleum ether / ethyl acetate) to give product **1c'** as colorless oil (112 mg, 81% yield for two steps). <sup>1</sup>H NMR (400 MHz, CDCl<sub>3</sub>): δ 7.55 (s, 1H), 7.43 (d, *J* = 6.9 Hz, 1H), 7.34 (d, *J* = 8.5 Hz, 4H), 6.98 (d, *J* = 8.4 Hz, 1H), 4.61 (t, *J* = 6.1 Hz, 1H), 3.84 (s, 3H), 1.99 – 1.64 (m, 2H), 0.96 (t, *J* = 7.2 Hz, 3H); <sup>13</sup>C NMR (100 MHz, CDCl<sub>3</sub>): δ 155.8, 140.2, 137.0, 133.8, 129.6, 129.2, 128.5, 127.7, 127.0, 126.7, 111.2, 75.5, 55.7, 31.9, 10.2.

#### 4-propionyl-N,N-dipropylbenzenesulfonamide (**1d**)

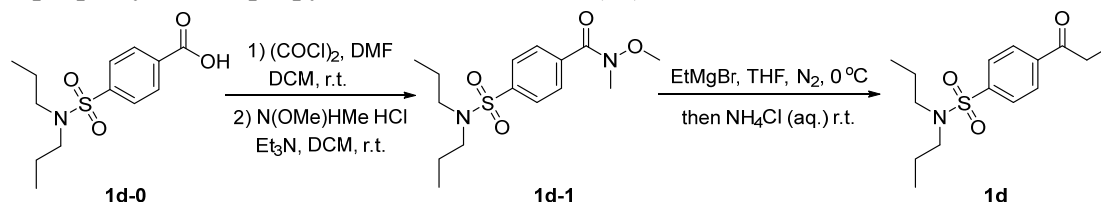

To a solution of probenecid (**1d-0**, 143 mg, 0.5 mmol) in DCM (5 mL) was added DMF (1.8 mg, 0.0025 mmol) and oxalyl chloride (2.0 M in DCM, 1 mL) at room temperature. The mixture was stirred for 1 hours and the solvent was removed under vacuum. The residue solid



was dissolved in DCM (2 mL) at 0 °C. To this solution was slowly added *N,O*-dimethylhydroxylamine hydrochloride (74 mg, 0.75 mmol), and triethylamine (126 mg, 1.25 mmol) and stirred for 2 hours at room temperature. After completion of the reaction, more DCM (25 mL) was added to the mixture. Then, the organic phase was washed with HCl solution (4.0 M in H<sub>2</sub>O, 5 mL for three times), saturation Na<sub>2</sub>CO<sub>3</sub> solution (5 mL for three times), brine (5 mL for three times), and dried with anhydrous Na<sub>2</sub>SO<sub>4</sub>. The solvent was removed under vacuum to give Weinreb amine **1d-1** (156 mg, 95% yield) as white solid. <sup>1</sup>H NMR (400 MHz, CDCl<sub>3</sub>): δ 7.84 (d, *J* = 8.1 Hz, 2H), 7.78 (d, *J* = 8.1 Hz, 2H), 3.52 (s, 3H), 3.38 (s, 3H), 3.09 (t, *J* = 7.7 Hz, 4H), 1.77 – 1.42 (m, 4H), 0.87 (t, *J* = 7.3 Hz, 6H).

To a solution of Weinreb amine **1d-1** (120 mg, 0.36 mmol) in THF (2 mL) was added dropwise EtMgBr (1.0 M in THF, 0.4 mL, 0.4 mmol) at -20 °C. The mixture was warmed to room temperature for 8 hours. After completion of the reaction, saturated aqueous NH<sub>4</sub>Cl solution (1 mL) was added and the mixture was extracted with EtOAc. The organic layer was then washed with brine and dried over Na<sub>2</sub>SO<sub>4</sub>. The solvent was removed under vacuum and finally purified by silica gel rapid chromatography (Petroleum ether / ethyl acetate) to give product **1d** as white solid (90 mg, 83%). <sup>1</sup>H NMR (400 MHz, CDCl<sub>3</sub>): δ 8.10 – 8.00 (m, 2H), 7.88 (d, *J* = 8.2 Hz, 2H), 3.09 (t, *J* = 7.5 Hz, 4H), 3.03 – 2.99 (m, 2H), 1.59 – 1.46 (m, 4H), 1.22 (d, *J* = 7.2 Hz, 3H), 0.85 (t, *J* = 7.3 Hz, 6H). <sup>13</sup>C NMR (100 MHz, CDCl<sub>3</sub>): δ 199.6, 144.0, 139.5, 128.5, 127.2, 49.9, 32.2, 21.9, 11.1, 7.9.

### 1-(4-hydroxy-3-methoxyphenyl)propan-1-one (**1e**)

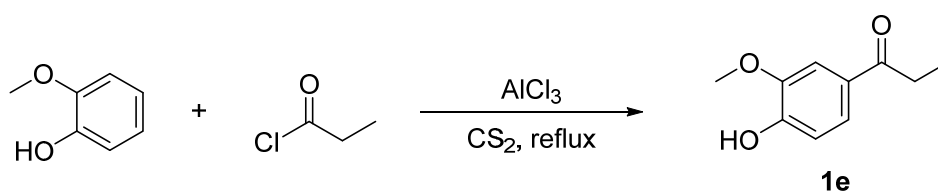

To a solution of 2-methoxyphenol (124 mg, 1 mmol) and powdered aluminum chloride (AlCl<sub>3</sub>, 399 mg, 3 mmol) in CS<sub>2</sub> (5 mL) was added propionyl chloride (370 mg, 4 mmol). The mixture was heated to reflux for 8 hours. After completion of the reaction, The reaction mixture was poured into cold HCl solution (4.0 M in H<sub>2</sub>O, 15 mL) and extracted with DCM. The organic phase was washed with H<sub>2</sub>O and brine, dried with anhydrous Na<sub>2</sub>SO<sub>4</sub>. After evaporation of solvent, the residue was subjected to column chromatography for isolation (gradient eluent: petroleum ether/ethyl acetate/dichloromethane 40:1:1) to give product **1e** (135 mg, 75%) as colorless solid. <sup>1</sup>H NMR (400 MHz, CDCl<sub>3</sub>): δ 7.64 – 7.43 (m, 2H), 6.94 (d, *J* = 8.7 Hz, 1H), 6.05 (s, 1H), 3.95 (s, 3H), 2.95 (q, *J* = 7.3 Hz, 2H), 1.21 (t, *J* = 7.3 Hz, 3H). Spectral data match those previously reported in the literature.<sup>2</sup>

## 4. Control experiment

### 4.1 Analytical data for enone intermediate

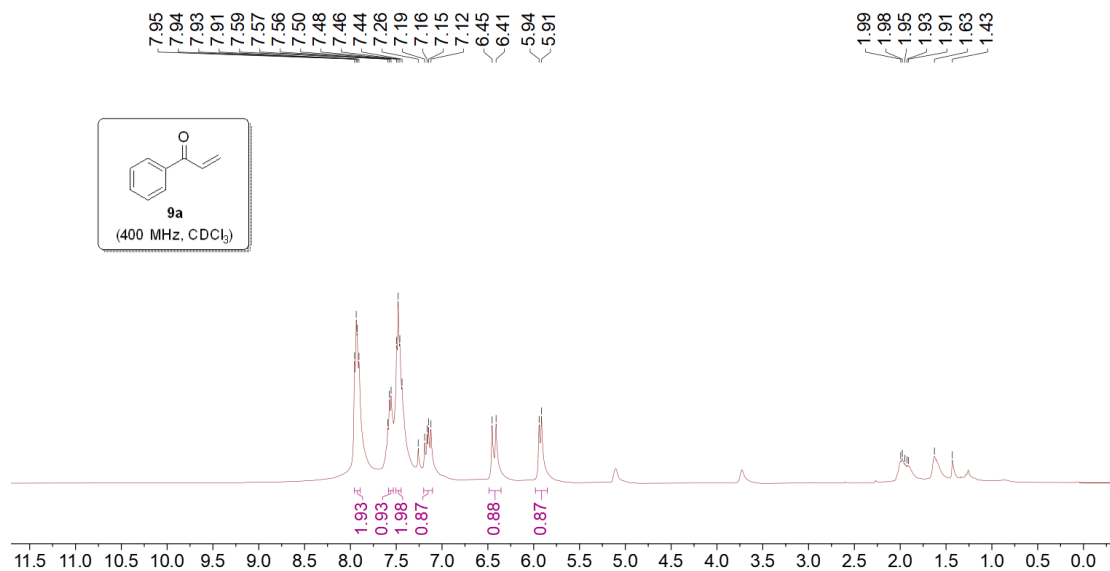

**<sup>1</sup>H NMR (400 MHz, CDCl<sub>3</sub>):** δ 7.92 (d, *J* = 7.8 Hz, 2H), 7.61 – 7.53 (m, 1H), 7.49 (d, *J* = 7.3 Hz, 2H), 7.19 – 7.12 (m, 1H), 6.43 (d, *J* = 17.1 Hz, 1H), 5.93 (d, *J* = 10.5 Hz, 1H); Spectral data match those previously reported in the literature.<sup>3</sup>

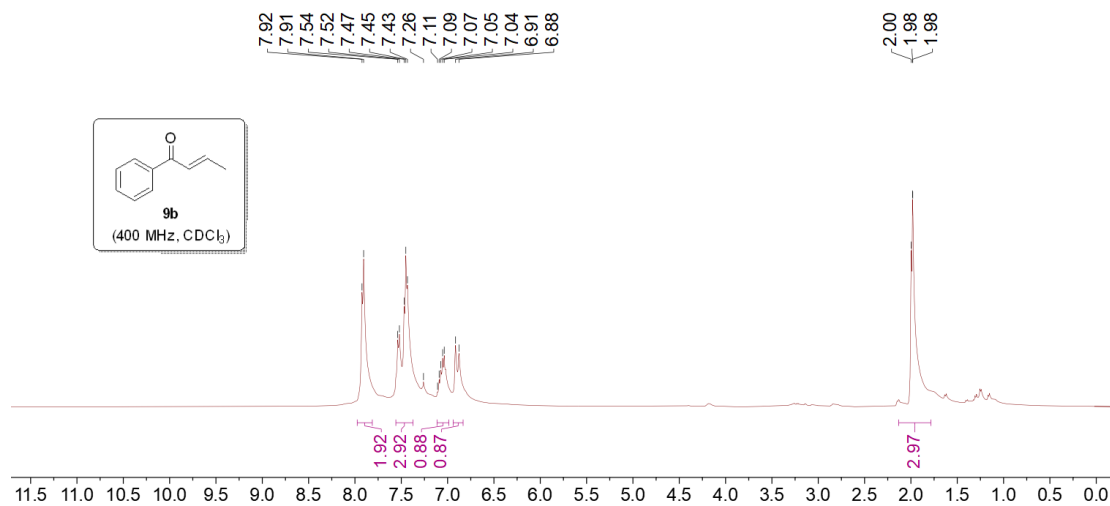

**<sup>1</sup>H NMR (400 MHz, CDCl<sub>3</sub>):** δ 7.91 (d, *J* = 7.0 Hz, 2H), 7.63 – 7.39 (m, 3H), 7.15 – 7.02 (m, 1H), 6.90 (d, *J* = 15.2 Hz, 1H), 2.04 – 1.86 (m, 3H); Spectral data match those previously reported in the literature.<sup>4</sup>

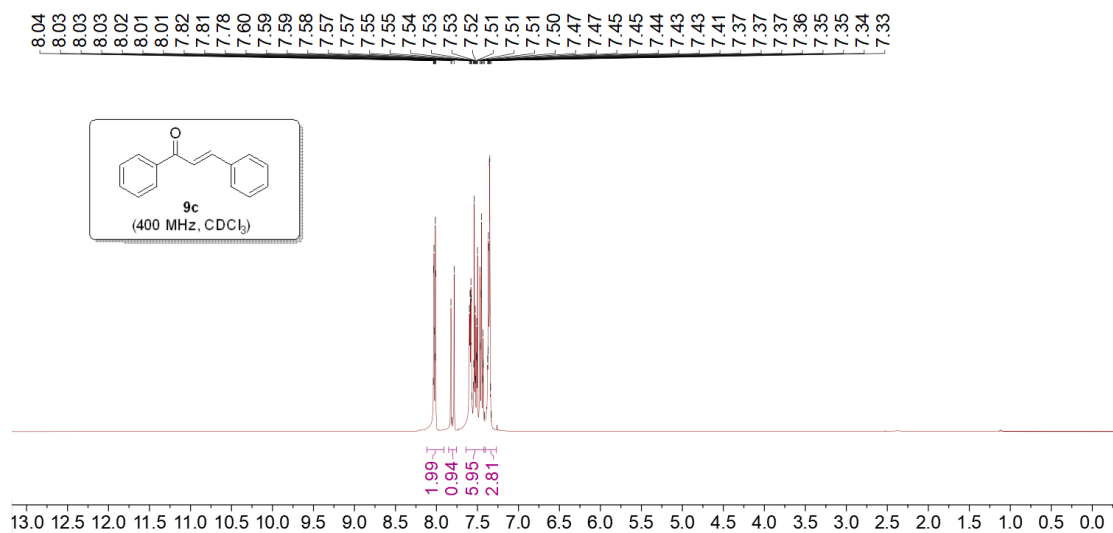

**<sup>1</sup>H NMR (400 MHz, CDCl<sub>3</sub>):** δ 8.07 – 7.97 (m, 2H), 7.91 – 7.74 (m, 1H), 7.62 – 7.41 (m, 6H), 7.38 – 7.33 (m, 3H); Spectral data match those previously reported in the literature.<sup>3</sup>

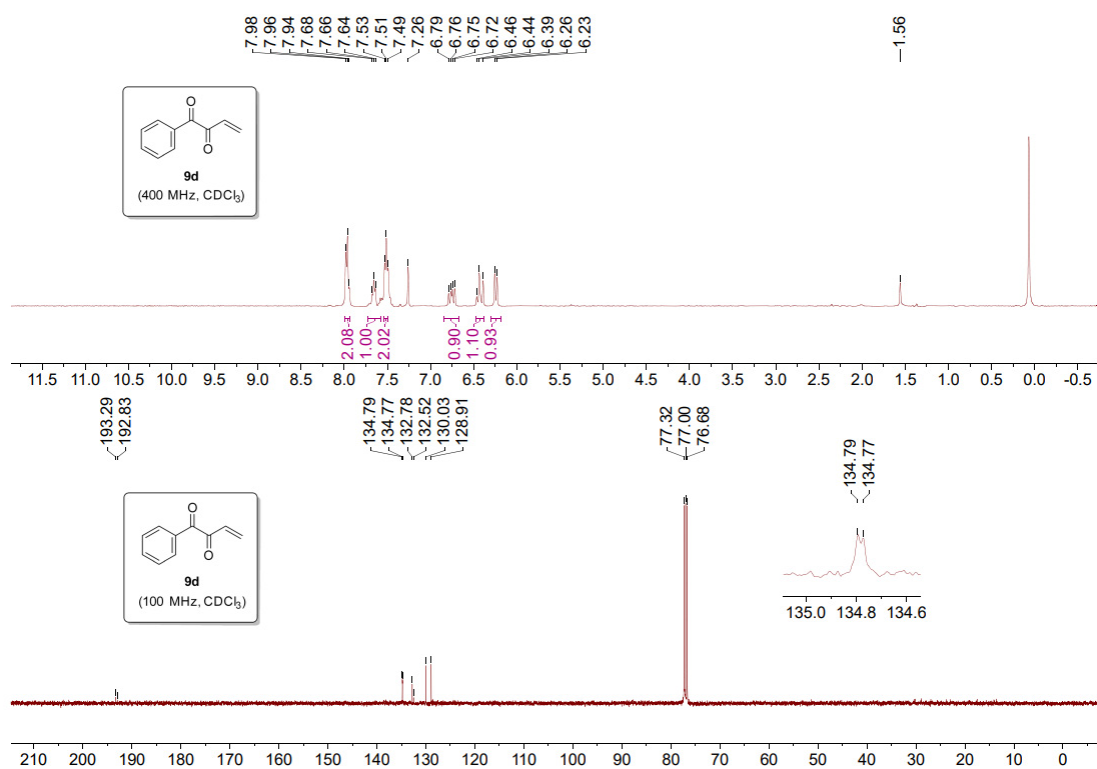

**9d** was prepared according to the reported method.<sup>5</sup> **<sup>1</sup>H NMR (400 MHz, CDCl<sub>3</sub>):** δ 7.97 (d,  $J = 8.0$  Hz, 2H), 7.65 (d,  $J = 7.7$  Hz, 1H), 7.51 (t,  $J = 8.0$  Hz, 2H), 6.79 – 6.72 (m, 1H), 6.49 – 6.37 (m, 1H), 6.24 (d,  $J = 11.2$  Hz, 1H); **<sup>13</sup>C NMR (100 MHz, CDCl<sub>3</sub>):** δ 193.3, 192.8, 134.8, 134.8, 132.8, 132.5, 130.0, 128.9. Spectral data match those previously reported in the literature.<sup>6</sup>

## 4.2 Control experiment

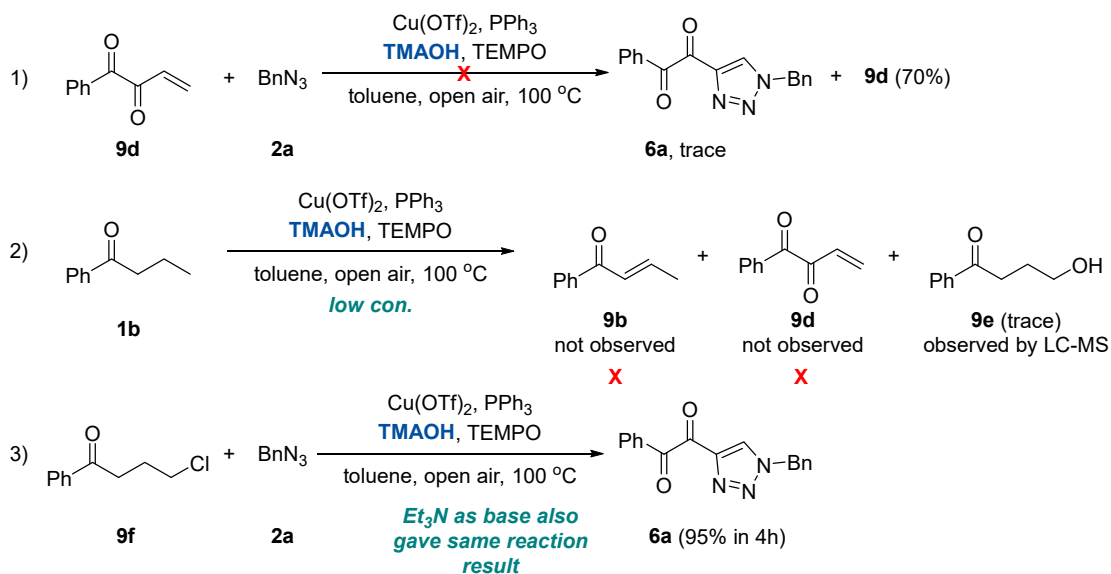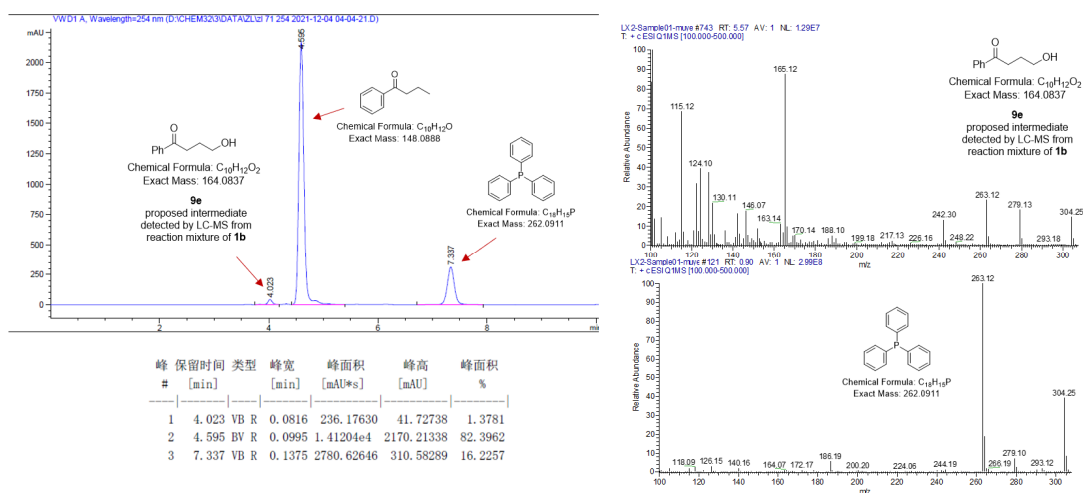

## 4.3 Proposed reaction pathway of the formation of 6a

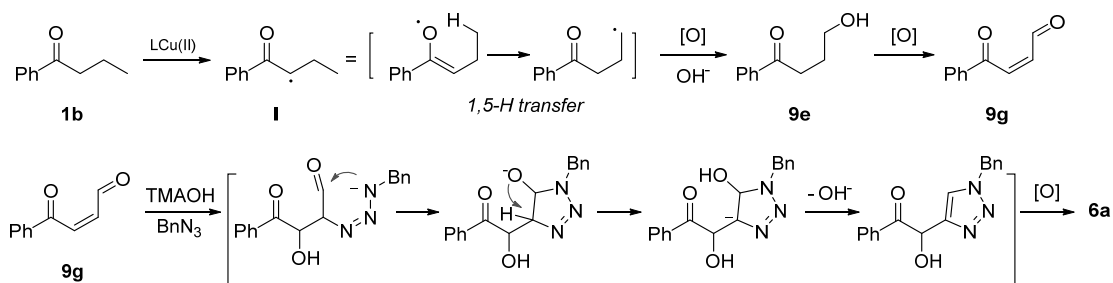

## 5. Analytical Data for acyl-1,2,3-triazoles

### *(1-Benzyl-1H-1,2,3-triazol-4-yl)(phenyl)methanone (3a)*

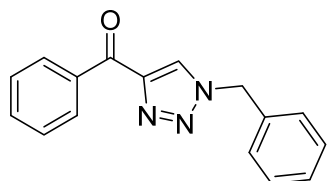

The title compound was prepared on 1.5 mmol scale following [General Procedure 3.1](#). The crude product was purified by silica gel column chromatography (0% to 20% EtOAc in petroleum ether) to afford the title compound 375 mg, 95% yield. White solid. Mp: 116–117 °C.  $R_f$  = 0.2 in EtOAc/petroleum ether (1:5).  $^1\text{H NMR}$  (400 MHz,  $\text{CDCl}_3$ ):  $\delta$  8.43 – 8.40 (m, 2H), 8.16 (s, 1H), 7.63 – 7.57 (m, 1H), 7.54 – 7.48 (m, 2H), 7.42 – 7.38 (m, 3H), 7.35 – 7.31 (m, 2H), 5.61 (s, 2H);  $^{13}\text{C NMR}$  (100 MHz,  $\text{CDCl}_3$ ):  $\delta$  185.6, 148.4, 136.5, 133.7, 133.3, 130.6, 129.3, 129.2, 128.4, 128.2, 54.5; Spectral data match those previously reported in the literature.<sup>7</sup>

### *(1-Benzyl-1H-1,2,3-triazol-4-yl)(4-methoxyphenyl)methanone (3b)*

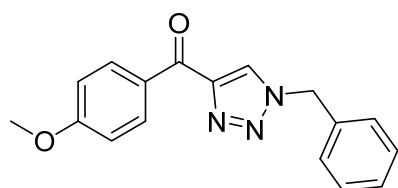

The title compound was prepared on 1.2 mmol scale following [General Procedure 3.1](#). The crude product was purified by silica gel column chromatography (0% to 20% EtOAc in petroleum ether) to afford the title compound 249 mg, 71% yield. White solid. Mp: 129–131 °C.  $R_f$  = 0.2 in EtOAc/petroleum ether (1:4).  $^1\text{H NMR}$  (400 MHz,  $\text{CDCl}_3$ ):  $\delta$  8.43 – 8.40 (m, 2H), 8.16 (s, 1H), 7.63 – 7.57 (m, 3H), 7.54 – 7.48 (m, 2H), 7.42 – 7.38 (m, 2H), 7.35 – 7.31 (m, 2H), 5.61 (s, 3H);  $^{13}\text{C NMR}$  (100 MHz,  $\text{CDCl}_3$ ):  $\delta$  183.9, 163.8, 148.8, 133.7, 133.1, 129.3, 129.1, 128.4, 128.1, 113.6, 55.5, 54.4; Spectral data match those previously reported in the literature.<sup>8</sup>

### *(1-Benzyl-1H-1,2,3-triazol-4-yl)(p-tolyl)methanone (3c)*

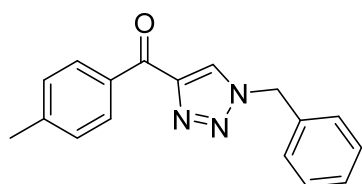

The title compound was prepared on 1.3 mmol scale following [General Procedure 3.1](#). The

crude product was purified by silica gel column chromatography (0% to 20% EtOAc in petroleum ether) to afford the title compound 263 mg, 73% yield. White solid. Mp: 130–132 °C.  $R_f = 0.1$  in EtOAc/petroleum ether (1:4).  $^1\text{H NMR}$  (400 MHz,  $\text{CDCl}_3$ ):  $\delta$  8.31 (d,  $J = 8.2$  Hz, 2H), 8.13 (s, 1H), 7.35 (d,  $J = 6.9$  Hz, 3H), 7.30 – 7.25 (m, 4H), 5.56 (s, 2H), 2.39 (s, 3H);  $^{13}\text{C NMR}$  (100 MHz,  $\text{CDCl}_3$ ):  $\delta$  185.1, 148.5, 144.1, 133.8 (d,  $J = 23.6$  Hz), 133.7, 130.6, 129.2, 129.02, 128.3, 128.1, 54.3, 21.6; Spectral data match those previously reported in the literature.<sup>9</sup>

**(1-Benzyl-1H-1,2,3-triazol-4-yl)(2-fluorophenyl)methanone (3d)**

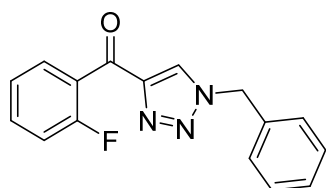

The title compound was prepared on 1.3 mmol scale following [General Procedure 3.1](#). The crude product was purified by silica gel column chromatography (0% to 20% EtOAc in petroleum ether) to afford the title compound 311 mg, 85% yield. White solid. Mp: 101-102 °C.  $R_f = 0.2$  in EtOAc/petroleum ether (1:3).  $^1\text{H NMR}$  (400 MHz,  $\text{CDCl}_3$ ):  $\delta$  8.10 (s, 1H), 7.91 – 7.77 (m, 1H), 7.56 – 7.47 (m, 1H), 7.44 – 7.39 (m, 3H), 7.35 – 7.31 (m, 2H), 7.28 (d,  $J = 6.5$  Hz, 1H), 7.21 – 7.15 (m, 1H), 5.60 (s, 2H);  $^{13}\text{C NMR}$  (100 MHz,  $\text{CDCl}_3$ ):  $\delta$  184.8, 159.5, 148.0, 133.8 (d,  $J = 8.7$  Hz), 133.5, 131.3, 129.4, 129.2, 128.4, 127.4, 124.1, 116.5 (d,  $J = 21.8$  Hz), 54.5; Spectral data match those previously reported in the literature.<sup>10</sup>

**(1-Benzyl-1H-1,2,3-triazol-4-yl)(4-fluorophenyl)methanone (3e)**

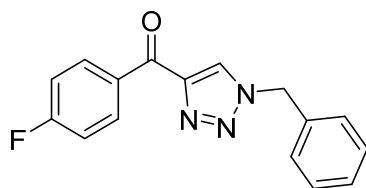

The title compound was prepared on 1.3 mmol scale following [General Procedure 3.1](#). The crude product was purified by silica gel column chromatography (0% to 20% EtOAc in petroleum ether) to afford the title compound 296 mg, 81% yield. White solid. Mp: 145-147 °C.  $R_f = 0.2$  in EtOAc/petroleum ether (1:4).  $^1\text{H NMR}$  (400 MHz,  $\text{CDCl}_3$ ):  $\delta$  8.55 – 8.52 (m, 2H), 8.17 (s, 1H), 7.43 – 7.39 (m, 3H), 7.35 – 7.32 (m, 2H), 7.21 – 7.16 (m, 2H), 5.61 (s, 2H);  $^{13}\text{C NMR}$  (100 MHz,  $\text{CDCl}_3$ ):  $\delta$  183.8, 166.8, 165.8, 148.3, 133.6, 133.4, 133.4, 132.7 (d,  $J = 2.9$  Hz), 129.3, 129.2, 128.3, 115.5 (d,  $J = 21.7$  Hz), 54.5; Spectral data match those previously reported in the literature.<sup>8</sup>

**(1-Benzyl-1H-1,2,3-triazol-4-yl)(3-chlorophenyl)methanone (3f)**

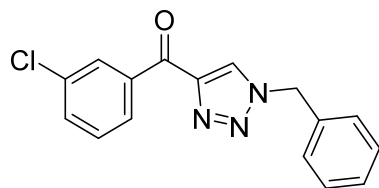

The title compound was prepared on 1.2 mmol scale following [General Procedure 3.1](#). The crude product was purified by silica gel column chromatography (0% to 20% EtOAc in petroleum ether ) to afford the title compound 296 mg, 83% yield. White solid. Mp: 93-97 °C.  $R_f$ = 0.3 in EtOAc/petroleum ether (1:3).  $^1\text{H NMR}$  (400 MHz,  $\text{CDCl}_3$ ):  $\delta$  8.41 – 8.36 (m, 2H), 8.17 (s, 1H), 7.59 – 7.57 (m, 1H), 7.48 – 7.40 (m, 4H), 7.36 – 7.33 (m, 2H), 5.61 (s, 2H);  $^{13}\text{C NMR}$  (100 MHz,  $\text{CDCl}_3$ ):  $\delta$  184.2, 148.0, 137.9, 134.6, 133.5, 133.2, 130.5, 129.7, 129.4, 129.3, 128.9, 128.4, 54.6; **HRMS (ESI) m/z**  $[\text{M}+\text{H}]^+$ : calcd for  $\text{C}_{16}\text{H}_{13}\text{ClN}_3\text{O}$ , 298.0742; found, 298.0721.

**(1-Benzyl-1H-1,2,3-triazol-4-yl)(4-chlorophenyl)methanone (3g)**

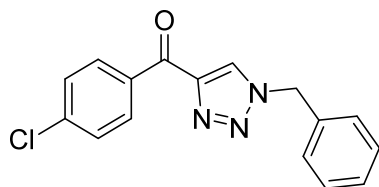

The title compound was prepared on 1.2 mmol scale following [General Procedure 3.1](#). The crude product was purified by silica gel column chromatography (0% to 20% EtOAc in petroleum ether) to afford the title compound 307 mg, 86% yield. White solid. Mp: 158-160 °C.  $R_f$ = 0.3 in EtOAc/ petroleum ether (1:4).  $^1\text{H NMR}$  (400 MHz,  $\text{CDCl}_3$ ):  $\delta$  8.43 (d,  $J$  = 8.7 Hz, 2H), 8.17 (s, 1H), 7.48 (d,  $J$  = 8.7 Hz, 2H), 7.42 – 7.38 (m, 3H), 7.36 – 7.32 (m, 2H), 5.61 (s, 2H);  $^{13}\text{C NMR}$  (100 MHz,  $\text{CDCl}_3$ ):  $\delta$  184.2, 148.2, 139.8, 134.7, 133.5, 132.1, 129.4, 129.2, 128.7, 128.4, 54.5; Spectral data match those previously reported in the literature.<sup>10</sup>

**(1-Benzyl-1H-1,2,3-triazol-4-yl)(4-bromophenyl)methanone (3h)**

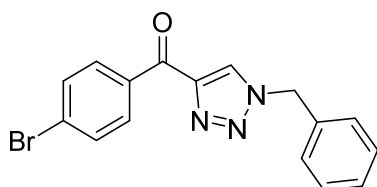

The title compound was prepared on 0.9 mmol scale following [General Procedure 3.1](#). The crude product was purified by silica gel column chromatography (0% to 20% EtOAc in petroleum ether) to afford the title compound 240 mg, 78% yield. White solid. Mp: 149–151 °C.  $R_f = 0.2$  in EtOAc/petroleum ether (1:3).  $^1\text{H NMR}$  (400 MHz,  $\text{CDCl}_3$ ):  $\delta$  8.38 – 8.31 (m, 2H), 8.18 (s, 1H), 7.67 – 7.63 (m, 2H), 7.42 – 7.39 (m, 3H), 7.35 – 7.32 (m, 2H), 5.60 (s, 2H);  $^{13}\text{C NMR}$  (100 MHz,  $\text{CDCl}_3$ ):  $\delta$  184.3, 148.1, 135.1, 133.5, 132.2, 131.7, 129.3, 129.2, 128.6, 128.4, 54.5; Spectral data match those previously reported in the literature.<sup>8</sup>

**(1-(2- Bromophenyl) -1H-1,2,3-triazol-4-yl)(phenyl)methanone (3i)**

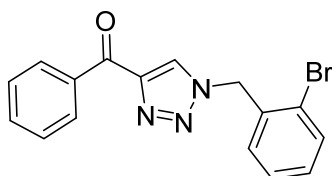

The title compound was prepared on 1.5 mmol scale following [General Procedure 3.1](#). The crude product was purified by silica gel column chromatography (0% to 10% EtOAc in petroleum ether) to afford the title compound 336 mg, 82% yield. White solid. Mp: 103–106 °C.  $R_f = 0.2$  in EtOAc/petroleum ether (1:4).  $^1\text{H NMR}$  (400 MHz,  $\text{CDCl}_3$ ):  $\delta$  8.45 – 8.41 (m, 2H), 8.16 (s, 1H), 7.64 – 7.58 (m, 2H), 7.54 – 7.48 (m, 2H), 7.44 – 7.37 (m, 1H), 7.35 – 7.31 (m, 2H), 5.61 (s, 2H);  $^{13}\text{C NMR}$  (100 MHz,  $\text{CDCl}_3$ ):  $\delta$  185.5, 148.1, 136.4, 133.4, 133.2, 133.2, 130.8, 130.8, 130.5, 128.5, 128.3, 123.8, 54.1; **HRMS (ESI)  $m/z$   $[\text{M}+\text{H}]^+$** : calcd for  $\text{C}_{16}\text{H}_{13}\text{BrN}_3\text{O}$ , 342.0237; found, 342.0213.

**(1-(2- Bromophenyl) -1H-1,2,3-triazol-4-yl)(p-toyl)methanone (3j)**

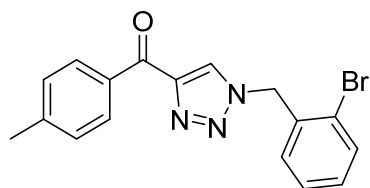

The title compound was prepared on 1.3 mmol scale following [General Procedure 3.1](#). The crude product was purified by silica gel column chromatography (0% to 10% EtOAc in petroleum ether) to afford the title compound 333 mg, 72% yield. White solid. Mp: 97–100 °C.  $R_f = 0.3$  in EtOAc/petroleum ether (1:3).  $^1\text{H NMR}$  (400 MHz,  $\text{CDCl}_3$ ):  $\delta$  8.35 – 8.30 (m, 2H), 8.22 (s, 1H), 7.63 – 7.61 (m, 1H), 7.35 – 7.26 (m, 4H), 7.24 (d,  $J = 4.4$  Hz, 1H), 5.72 (s, 2H), 2.41 (s, 3H);  $^{13}\text{C NMR}$  (100 MHz,  $\text{CDCl}_3$ ):  $\delta$  185.1, 148.4, 144.2, 133.9, 133.4, 133.3, 130.8, 130.8, 130.7, 129.1, 128.4, 128.3, 123.9, 54.1, 21.7; **HRMS (ESI)  $m/z$   $[\text{M} + \text{H}]^+$** : calcd for



C<sub>17</sub>H<sub>15</sub>BrN<sub>3</sub>O, 356.0393; found, 356.0368.

**(1-(2-Bromophenyl)-1H-1,2,3-triazol-4-yl)(2-fluorophenyl)methanone(3k)**

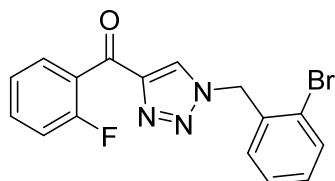

The title compound was prepared on 1.3 mmol scale following [General Procedure 3.1](#). The crude product was purified by silica gel column chromatography (0% to 10% EtOAc in petroleum ether) to afford the title compound 395 mg, 84% yield. White solid. Mp: 60-62 °C.  $R_f = 0.2$  in EtOAc/petroleum ether (1:4). <sup>1</sup>H NMR (400 MHz, CDCl<sub>3</sub>): δ 8.21 (s, 1H), 7.88 – 7.83 (m, 1H), 7.67 – 7.64 (m, 1H), 7.57 – 7.52 (m, 1H), 7.38 – 7.34 (m, 1H), 7.31 – 7.27 (m, 3H), 7.20 – 7.15 (m, 1H), 5.74 (s, 2H); <sup>13</sup>C NMR (100 MHz, CDCl<sub>3</sub>): δ 184.8, 147.9, 133.8 (d,  $J = 8.9$  Hz), 133.5, 133.1, 131.3, 131.0, 130.9, 128.4, 127.6, 124.1, 116.5 (d,  $J = 21.8$  Hz), 54.2; HRMS (ESI)  $m/z$  [M + H]<sup>+</sup>: calcd for C<sub>16</sub>H<sub>12</sub>BrFN<sub>3</sub>O, 360.0142; found, 360.0145.

**(1-(2-Bromophenyl)-1H-1,2,3-triazol-4-yl)(4-bromophenyl)methanone (3l)**

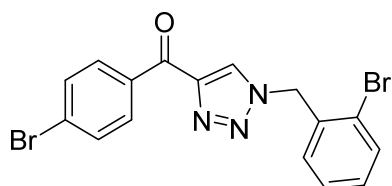

The title compound was prepared on 0.9 mmol scale following [General Procedure 3.1](#). The crude product was purified by silica gel column chromatography (0% to 10% EtOAc in petroleum ether) to afford the title compound 326 mg, 86% yield. White solid. Mp: 106-108 °C.  $R_f = 0.2$  in EtOAc/petroleum ether (1:4). <sup>1</sup>H NMR (400 MHz, CDCl<sub>3</sub>): δ 8.37 – 8.32 (m, 2H), 8.27 (s, 1H), 8.27 (s, 3H), 7.65 – 7.62 (m, 1H), 7.37 – 7.25 (m, 2H), 5.73 (s, 2H); <sup>13</sup>C NMR (100 MHz, CDCl<sub>3</sub>): δ 184.2, 147.9, 135.0, 133.4, 133.1, 132.1, 131.6, 130.9, 130.9, 128.7, 128.6, 128.3, 123.9, 54.2; Spectral data match those previously reported in the literature.<sup>11</sup>

**(1-(4-fluorobenzyl)-1H-1,2,3-triazol-4-yl)(phenyl)methanone (3m)**

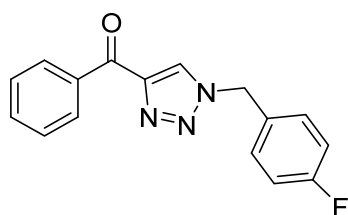

The title compound was prepared on 1.5 mmol scale following [General Procedure 3.1](#). The crude product was purified by silica gel column chromatography (0% to 20% EtOAc in petroleum ether) to afford the title compound 363 mg, 86% yield. White solid. Mp: 140–145 °C.  $R_f$  = 0.2 in EtOAc/ petroleum ether (1:3).  $^1\text{H NMR}$  (400 MHz,  $\text{CDCl}_3$ ):  $\delta$  8.42 – 8.39 (m, 2H), 8.18 (s, 1H), 7.64 – 7.57 (m, 1H), 7.54 – 7.47 (m, 2H), 7.37 – 7.30 (m, 2H), 7.15 – 7.04 (m, 2H), 5.58 (s, 2H);  $^{13}\text{C NMR}$  (100 MHz,  $\text{CDCl}_3$ ):  $\delta$  185.6, 164.3, 161.8, 148.4, 136.4, 133.3, 130.6, 130.3 (d,  $J$  = 8.5 Hz), 129.6 (d,  $J$  = 3.4 Hz), 128.4, 128.1, 116.4 (d,  $J$  = 21.8 Hz), 53.7; **HRMS (ESI)  $m/z$   $[M + H]^+$** : calcd for  $\text{C}_{16}\text{H}_{13}\text{FN}_3\text{O}$ , 282.1037; found, 282.1014.

***(1-(4-Fluorobenzyl)-1H-1,2,3-triazol-4-yl)(4-methoxyphenyl)-methanone (3n)***

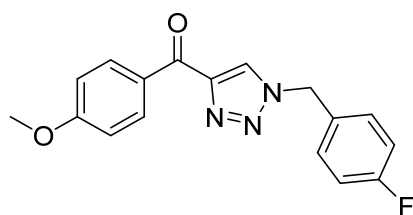

The title compound was prepared on 1.2 mmol scale following [General Procedure 3.1](#). The crude product was purified by silica gel column chromatography (0% to 20% EtOAc in petroleum ether) to afford the title compound 269 mg, 72% yield. White solid. Mp: 131–132 °C.  $R_f$  = 0.2 in EtOAc/petroleum ether (1:4).  $^1\text{H NMR}$  (400 MHz,  $\text{CDCl}_3$ ):  $\delta$  8.54 – 8.47 (m, 2H), 8.14 (s, 1H), 7.36 – 7.30 (m, 2H), 7.12 – 7.07 (m, 2H), 7.01 – 6.96 (m, 2H), 5.58 (s, 2H), 3.90 (s, 3H);  $^{13}\text{C NMR}$  (100 MHz,  $\text{CDCl}_3$ ):  $\delta$  183.8, 163.9, 163.8, 162.2, 148.9, 133.1, 130.3 (d,  $J$  = 8.4 Hz), 129.6 (d,  $J$  = 3.4 Hz), 129.3, 128.0, 116.35 (d,  $J$  = 21.9 Hz), 113.7, 55.5, 53.6; Spectral data match those previously reported in the literature.<sup>11</sup>

***(1-(4-Fluorobenzyl)-1H-1,2,3-triazol-4-yl)(p-tolyl)methanone (3o)***

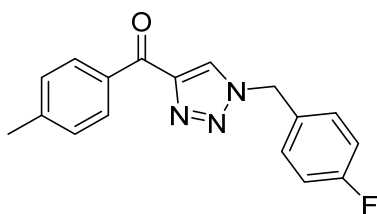

The title compound was prepared on 1.3 mmol scale following [General Procedure 3.1](#). The crude product was purified by silica gel column chromatography (0% to 20% EtOAc in petroleum ether) to afford the title compound 288 mg, 75% yield. White solid. Mp: 145–147 °C.

$R_f = 0.3$  in EtOAc/petroleum ether (1:3).  **$^1\text{H NMR}$  (400 MHz,  $\text{CDCl}_3$ ):**  $\delta$  8.34 (d,  $J = 8.2$  Hz, 2H), 8.15 (s, 1H), 7.36 – 7.30 (m, 4H), 7.12 – 7.06 (m, 2H), 5.58 (s, 2H), 2.43 (s, 3H);  **$^{13}\text{C NMR}$  (100 MHz,  $\text{CDCl}_3$ ):**  $\delta$  185.1, 164.3, 161.8, 148.7, 144.3, 133.8, 130.7, 130.3 (d,  $J = 8.5$  Hz), 129.6, 129.1, 128.0, 116.4 (d,  $J = 21.9$  Hz), 53.6, 21.7; Spectral data match those previously reported in the literature.<sup>11</sup>

***(1-(4-Fluorobenzyl)-1H-1,2,3-triazol-4-yl)(4-fluorophenyl)methanone (3p)***

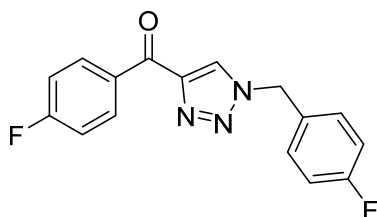

The title compound was prepared on 1.3 mmol scale following [General Procedure 3.1](#). The crude product was purified by silica gel column chromatography (0% to 20% EtOAc in petroleum ether) to afford the title compound 315 mg, 81% yield. White solid. Mp: 165–168 °C.  $R_f = 0.1$  in EtOAc/ petroleum ether (1:4).  **$^1\text{H NMR}$  (400 MHz,  $\text{CDCl}_3$ ):**  $\delta$  8.56 – 8.49 (m, 2H), 8.18 (s, 1H), 7.35 – 7.31 (m, 2H), 7.20 – 7.15 (m, 2H), 7.12 – 7.07 (m, 2H), 5.58 (s, 2H);  **$^{13}\text{C NMR}$  (100 MHz,  $\text{CDCl}_3$ ):**  $\delta$  183.7, 167.2, 164.7, 164.3, 161.8, 148.4, 133.4 (d,  $J = 9.3$  Hz), 132.6, 130.3 (d,  $J = 8.5$  Hz), 129.5 (d,  $J = 3.4$  Hz), 128.2, 116.4 (d,  $J = 21.9$  Hz), 115.5 (d,  $J = 21.8$  Hz), 53.7; **HRMS (ESI)  $m/z$  [ $M + H$ ]<sup>+</sup>:** calcd for  $\text{C}_{16}\text{H}_{12}\text{F}_2\text{N}_3\text{O}$ , 300.0943; found, 316.0920.

***(1-(4-Fluorobenzyl)-1H-1,2,3-triazol-4-yl)(3-chlorophenyl)methanone (3q)***

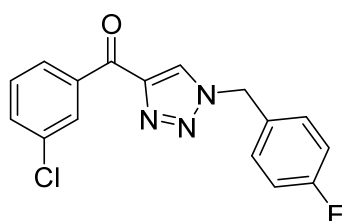

The title compound was prepared on 1.2 mmol scale following [General Procedure 3.1](#). The crude product was purified by silica gel column chromatography (0% to 20% EtOAc in petroleum ether) to afford the title compound 314 mg, 83% yield. White solid. Mp: 123–125 °C.  $R_f = 0.2$  in EtOAc/ petroleum ether (1:5).  **$^1\text{H NMR}$  (400 MHz,  $\text{CDCl}_3$ ):**  $\delta$  8.40 – 8.34 (m, 2H), 8.19 (s, 1H), 7.58 – 7.56 (m, 1H), 7.45 (t,  $J = 7.9$  Hz, 1H), 7.37 – 7.30 (m, 2H), 7.16 – 7.02 (m, 2H), 5.58 (s, 2H);  **$^{13}\text{C NMR}$  (100 MHz,  $\text{CDCl}_3$ ):**  $\delta$  184.0, 164.3, 161.8, 148.0, 137.8, 134.6,

133.2, 130.4, 130.4, 130.3, 129.7, 129.4 (d,  $J = 3.4$  Hz), 128.8, 128.3, 116.4 (d,  $J = 21.9$  Hz), 53.7; **HRMS (ESI) m/z**  $[M + H]^+$ : calcd for  $C_{16}H_{11}ClFN_3O$ , 316.0647; found, 316.0640.

**(1-(4-Chlorobenzyl)-1H-1,2,3-triazol-4-yl)(phenyl)methanone (3r)**

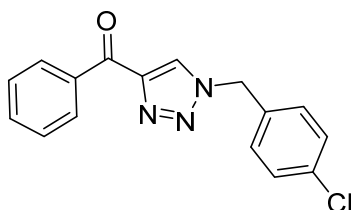

The title compound was prepared on 1.5 mmol scale following [General Procedure 3.1](#). The crude product was purified by silica gel column chromatography (0% to 20% EtOAc in petroleum ether) to afford the title compound 310 mg, 87% yield. White solid. Mp: 150-152 °C.  $R_f = 0.3$  in EtOAc/petroleum ether (1:3).  $^1H$  NMR (400 MHz,  $CDCl_3$ ):  $\delta$  8.43 – 8.39 (m, 2H), 8.18 (s, 1H), 7.65 – 7.58 (m, 1H), 7.54 – 7.47 (m, 2H), 7.41 – 7.36 (m, 2H), 7.29 – 7.27 (m, 2H), 5.58 (s, 2H);  $^{13}C$  NMR (100 MHz,  $CDCl_3$ ):  $\delta$  185.5, 148.5, 136.4, 135.3, 133.3, 132.2, 130.6, 129.6, 129.5, 128.4, 128.2, 53.7; Spectral data match those previously reported in the literature.<sup>8</sup>

**((4-Bromophenyl)(1-(4-chlorobenzyl)-1H-1,2,3-triazol-4-yl)methanone (3s)**

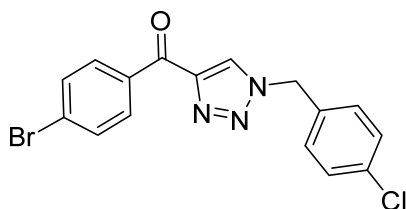

The title compound was prepared on 0.9 mmol scale following [General Procedure 3.1](#). The crude product was purified by silica gel column chromatography (0% to 20% EtOAc in petroleum ether) to afford the title compound 285 mg, 84% yield. White solid. Mp: 175–177 °C.  $R_f = 0.2$  in EtOAc/petroleum ether (1:4).  $^1H$  NMR (400 MHz,  $CDCl_3$ ):  $\delta$  8.37 – 8.33 (m, 2H), 8.18 (s, 1H), 7.68 – 7.64 (m, 2H), 7.40 – 7.37 (m, 2H), 7.30 – 7.23 (m, 2H), 5.58 (s, 2H);  $^{13}C$  NMR (100 MHz,  $CDCl_3$ ):  $\delta$  184.2, 148.3, 135.4, 135.0, 132.2, 132.0, 131.7, 129.7, 129.6, 128.8, 128.3, 53.8; Spectral data match those previously reported in the literature.<sup>11</sup>

**(4-Bromophenyl)(1-(2-chlorophenyl)-1H-1,2,3-triazol-4-yl)methanone (3t)**

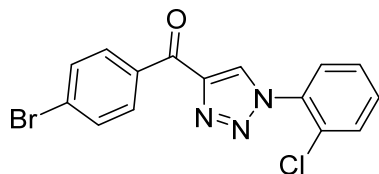

The title compound was prepared on 0.9 mmol scale following [General Procedure 3.1](#). The crude product was purified by silica gel column chromatography (0% to 20% EtOAc in petroleum ether) to afford the title compound 235 mg, 72% yield. White solid. Mp: 120–123 °C.  $R_f$  = 0.2 in EtOAc/petroleum ether (1:5).  **$^1\text{H NMR}$  (400 MHz,  $\text{CDCl}_3$ )**:  $\delta$  8.74 (s, 1H), 8.49 – 8.41 (m, 2H), 7.75 – 7.63 (m, 4H), 7.57 – 7.49 (m, 2H);  **$^{13}\text{C NMR}$  (100 MHz,  $\text{CDCl}_3$ )**:  $\delta$  184.2, 147.6, 135.1, 134.1, 132.2, 131.8, 131.4, 130.9, 130.5, 128.8, 128.7, 128.1, 127.6; Spectral data match those previously reported in the literature.<sup>11</sup>

***Phenyl(1-phenyl-1H-1,2,3-triazol-4-yl)methanone (3u)***

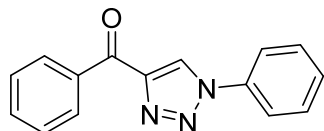

The title compound was prepared on 1.5 mmol scale following [General Procedure 3.1](#). The crude product was purified by silica gel column chromatography (0% to 10% EtOAc in petroleum ether) to afford the title compound 299 mg, 80% yield. White solid. Mp: 126–127 °C.  $R_f$  = 0.2 in EtOAc/petroleum ether (1:6).  **$^1\text{H NMR}$  (400 MHz,  $\text{CDCl}_3$ )**:  $\delta$  8.71 (s, 1H), 8.49 (d,  $J$  = 7.6 Hz, 2H), 7.82 (d,  $J$  = 7.5 Hz, 2H), 7.66 – 7.50 (m, 6H);  **$^{13}\text{C NMR}$  (100 MHz,  $\text{CDCl}_3$ )**:  $\delta$  185.6, 136.4, 133.4, 130.7, 130.0, 129.6, 128.5, 126.4, 120.8; Spectral data match those previously reported in the literature.<sup>7</sup>

***(1-Phenyl-1H-1,2,3-triazol-4-yl)(p-tolyl)methanone (3v)***

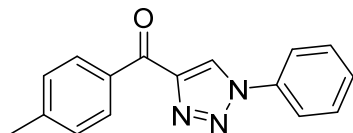

The title compound was prepared on 1.3 mmol scale following [General Procedure 3.1](#). The crude product was purified by silica gel column chromatography (0% to 10% EtOAc in petroleum ether) to afford the title compound 243 mg, 71% yield. White solid. Mp: 152–154 °C.  $R_f$  = 0.1 in EtOAc/petroleum ether (1:5).  **$^1\text{H NMR}$  (400 MHz,  $\text{CDCl}_3$ )**:  $\delta$  8.68 (s, 1H), 8.42 (d,  $J$  = 8.2 Hz, 2H), 7.87 – 7.73 (m, 2H), 7.58 (d,  $J$  = 8.0 Hz, 2H), 7.54 – 7.49 (m, 1H), 7.35 (d,  $J$  = 8.0 Hz, 2H), 2.46 (s, 3H);  **$^{13}\text{C NMR}$  (100 MHz,  $\text{CDCl}_3$ )**:  $\delta$  185.0, 148.8, 144.4, 136.4, 133.9,

130.8, 129.9, 129.4, 129.2 126.2, 120.8, 21.7; Spectral data match those previously reported in the literature.<sup>9</sup>

***Ethyl 2-(4-benzoyl-1H-1,2,3-triazol-1-yl)acetate (3w)***

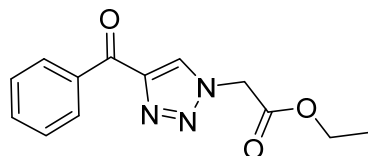

The title compound was prepared on 1.5 mmol scale following [General Procedure 3.1](#). The crude product was purified by silica gel column chromatography (0% to 20% EtOAc in petroleum ether) to afford the title compound 338 mg, 87% yield. White solid. Mp: 125–126 °C.  $R_f$  = 0.2 in EtOAc/petroleum ether (1:4). <sup>1</sup>H NMR (400 MHz, CDCl<sub>3</sub>): δ 8.44 – 8.41 (m, 3H), 7.66 – 7.61 (m, 1H), 7.57 – 7.51 (m, 2H), 5.27 (s, 2H), 4.32 (q,  $J$  = 7.1 Hz, 2H), 1.50 – 1.01 (m, 3H); <sup>13</sup>C NMR (100 MHz, CDCl<sub>3</sub>): δ 185.5, 165.6, 148.4, 136.4, 133.3, 130.6, 129.8, 128.4, 62.8, 51.0, 14.0; Spectral data match those previously reported in the literature.<sup>12</sup>

***Ethyl 2-(4-(4-methylbenzoyl)-1H-1,2,3-triazol-1-yl)acetate (3x)***

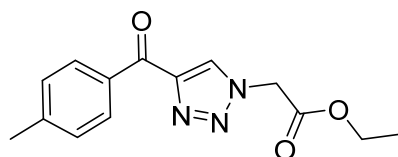

The title compound was prepared on 1.3 mmol scale following [General Procedure 3.1](#). The crude product was purified by silica gel column chromatography (0% to 20% EtOAc in petroleum ether) to afford the title compound 270 mg, 76% yield. White solid. Mp: 148–150 °C.  $R_f$  = 0.3 in EtOAc/petroleum ether (1:3). <sup>1</sup>H NMR (400 MHz, CDCl<sub>3</sub>): δ 8.43 – 8.29 (m, 3H), 7.32 (d,  $J$  = 8.0 Hz, 2H), 5.25 (s, 2H), 4.30 (q,  $J$  = 7.1 Hz, 2H), 2.44 (s, 3H), 1.31 (t,  $J$  = 7.1 Hz, 3H); <sup>13</sup>C NMR (100 MHz, CDCl<sub>3</sub>): δ 185.0, 165.6, 148.6, 144.2, 133.9, 130.7, 129.7, 129.1, 62.7, 51.0, 21.7, 14.0; HRMS (ESI)  $m/z$  [M + H]<sup>+</sup>: calcd for C<sub>14</sub>H<sub>16</sub>N<sub>3</sub>O<sub>3</sub>, 274.1186; found, 274.1172.

***Ethyl 2-(4-(3-chlorobenzoyl)-1H-1,2,3-triazol-1-yl)acetate (3y)***

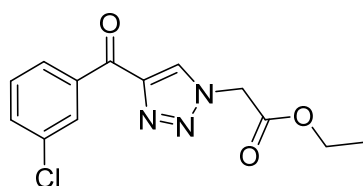

The title compound was prepared on 1.2 mmol scale following [General Procedure 3.1](#). The crude product was purified by silica gel column chromatography (0% to 20% EtOAc in petroleum ether) to afford the title compound 299 mg, 85% yield. White solid. Mp: 84–88 °C.  $R_f$  = 0.3 in EtOAc/petroleum ether (1:3). **<sup>1</sup>H NMR (400 MHz, CDCl<sub>3</sub>)**: δ 8.43 (s, 1H), 8.41 – 8.36 (m, 2H), 7.60 – 7.57 (m, 1H), 7.47 (t,  $J$  = 7.9 Hz, 1H), 5.26 (s, 2H), 4.31 (q,  $J$  = 7.1 Hz, 2H), 1.71 – 1.08 (m, 3H); **<sup>13</sup>C NMR (100 MHz, CDCl<sub>3</sub>)**: δ 184.0, 165.5, 148.0, 137.8, 134.6, 133.3, 130.4, 130.0, 129.7, 128.8, 62.8, 51.0, 14.0; **HRMS (ESI) m/z [M + H]<sup>+</sup>**: calcd for C<sub>13</sub>H<sub>13</sub>ClN<sub>3</sub>O<sub>3</sub>, 294.0640; found, 294.0626.

***Ethyl 2-(4-(4-bromobenzoyl)-1H-1,2,3-triazol-1-yl)acetate (3z)***

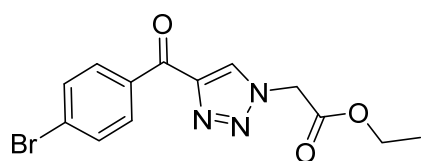

The title compound was prepared on 0.9 mmol scale following [General Procedure 3.1](#). The crude product was purified by silica gel column chromatography (0% to 20% EtOAc in petroleum ether) to afford the title compound 247 mg, 82% yield. White solid. Mp: 162–164 °C.  $R_f$  = 0.2 in EtOAc/petroleum ether (1:3). **<sup>1</sup>H NMR (400 MHz, CDCl<sub>3</sub>)**: δ 8.42 (s, 1H), 8.38 – 8.29 (m, 2H), 7.71 – 7.63 (m, 2H), 5.26 (s, 2H), 4.31 (q,  $J$  = 7.1 Hz, 2H), 1.32 (t,  $J$  = 7.1 Hz, 3H); **<sup>13</sup>C NMR (100 MHz, CDCl<sub>3</sub>)**: δ 184.2, 165.6, 148.2, 135.1, 132.2, 131.7, 130.0, 128.7, 62.8, 51.0, 14.0; Spectral data match those previously reported in the literature.<sup>11</sup>

***(1-benzyl-1H-1,2,3-triazol-4-yl)(furan-2-yl)methanone (3aa)***

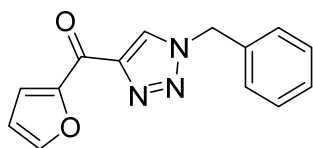

The title compound was prepared on 1.6 mmol scale following [General Procedure 3.1](#). The crude product was purified by silica gel column chromatography (0% to 30% EtOAc in petroleum ether) to afford the title compound 357 mg, 88% yield. White solid. Mp: 142–145 °C.  $R_f$  = 0.3 in EtOAc/petroleum ether (1:4). **<sup>1</sup>H NMR (400 MHz, CDCl<sub>3</sub>)**: δ 8.30 – 8.01 (m, 2H), 7.69 (s, 1H), 7.36 – 7.30 (m, 5H), 6.90 – 6.31 (m, 1H), 5.58 (s, 2H); **<sup>13</sup>C NMR (100 MHz, CDCl<sub>3</sub>)**: δ 172.1, 150.7, 147.6, 146.9, 133.6, 129.2, 129.0, 128.2, 127.6, 122.7, 112.5, 54.3; **HRMS (ESI) m/z [M + H]<sup>+</sup>**: calcd for C<sub>14</sub>H<sub>11</sub>N<sub>3</sub>O<sub>2</sub>Na, 276.0743; found, 276.0742.

***(1-benzyl-1H-1,2,3-triazol-4-yl)(pyridin-4-yl)methanone (3ab)***

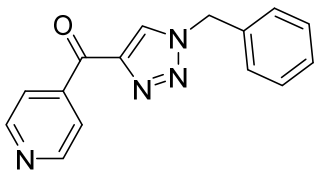

The title compound was prepared on 1.5 mmol scale following [General Procedure 3.1](#). The crude product was purified by silica gel column chromatography (0% to 30% EtOAc in petroleum ether) to afford the title compound 337 mg, 85% yield. White solid. Mp: 120–123 °C.  $R_f = 0.1$  in EtOAc/petroleum ether (1:4).  $^1\text{H NMR}$  (400 MHz,  $\text{CDCl}_3$ ):  $\delta$  8.79 (d,  $J = 4.7$  Hz, 2H), 8.31 – 7.99 (m, 3H), 7.40 – 7.27 (m, 5H), 5.58 (s, 2H);  $^{13}\text{C NMR}$  (100 MHz,  $\text{CDCl}_3$ ):  $\delta$  184.4, 150.4, 147.4, 142.3, 133.4, 129.2, 129.1, 128.5, 128.2, 123.2, 54.4; **HRMS (ESI) m/z**  $[\text{M} + \text{H}]^+$ : calcd for  $\text{C}_{15}\text{H}_{12}\text{N}_4\text{O}$ , 265.1084; found, 265.1083.

**(1-benzyl-1H-1,2,3-triazol-4-yl)(naphthalen-2-yl)methanone (3ac)**

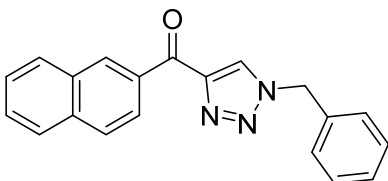

The title compound was prepared on 1.1 mmol scale following [General Procedure 3.1](#). The crude product was purified by silica gel column chromatography (0% to 20% EtOAc in petroleum ether) to afford the title compound 259 mg, 75% yield. White solid. Mp: 155–157 °C.  $R_f = 0.2$  in EtOAc/petroleum ether (1:4).  $^1\text{H NMR}$  (400 MHz,  $\text{CDCl}_3$ ):  $\delta$  9.24 (s, 1H), 8.32 (t,  $J = 10.2$  Hz, 1H), 8.20 (d,  $J = 22.5$  Hz, 1H), 8.04 (d,  $J = 8.0$  Hz, 1H), 7.95 – 7.88 (m, 2H), 7.63 – 7.53 (m, 2H), 7.44 – 7.35 (m, 5H), 5.63 (s, 2H);  $^{13}\text{C NMR}$  (100 MHz,  $\text{CDCl}_3$ ):  $\delta$  185.3, 148.6, 135.7, 133.7, 133.4, 132.5, 131.9, 130.0, 129.3, 129.1, 128.6, 128.4, 128.1, 127.6, 126.5, 125.4, 54.4. Spectral data match those previously reported in the literature.<sup>13</sup>

**(1-benzyl-1H-1,2,3-triazol-4-yl)(3'-chloro-6-methoxy-[1,1'-biphenyl]-3-yl)methanone(3ad)**

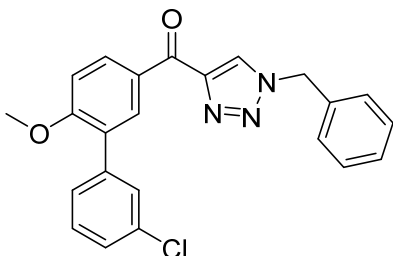

The title compound was prepared on 0.4 mmol scale following [General Procedure 3.1](#). The crude product was purified by silica gel column chromatography (0% to 20% EtOAc in



petroleum ether) to afford the title compound 139 mg, 85% yield. Light yellow solid. Mp: 182–185 °C.  $R_f = 0.4$  in EtOAc/petroleum ether (1:3).  $^1\text{H NMR}$  (400 MHz,  $\text{CDCl}_3$ ):  $\delta$  8.62 (d,  $J = 8.6$  Hz, 1H), 8.42 (s, 1H), 8.16 (s, 1H), 7.56 (s, 2H), 7.45 – 7.38 (m, 4H), 7.36 – 7.30 (m, 4H), 7.08 (d,  $J = 8.8$  Hz, 1H), 5.60 (s, 2H), 3.92 (s, 3H).  $^{13}\text{C NMR}$  (100 MHz,  $\text{CDCl}_3$ ):  $\delta$  183.8, 160.5, 148.7, 139.3, 133.8, 133.7, 133.4, 133.0, 129.6, 129.4, 129.3, 129.3, 129.2, 129.2, 128.4, 128.1, 127.8, 127.4, 110.6, 55.9, 54.5. **MS (ESI)**  $[\text{M} + \text{H}]^+$ : calcd for  $\text{C}_{24}\text{H}_{18}\text{ClN}_3\text{O}_2$ , 404.1160; found, 404.2.

**4-(1-benzyl-1H-1,2,3-triazole-4-carbonyl)-N,N-dipropylbenzenesulfonamide(3ae)**

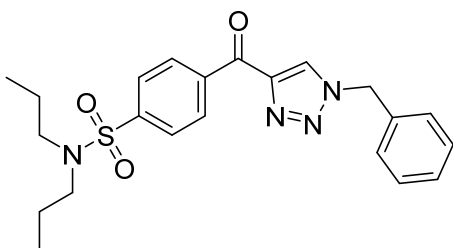

The title compound was prepared on 0.3 mmol scale following [General Procedure 3.1](#). The crude product was purified by silica gel column chromatography (10% to 40% EtOAc in petroleum ether) to afford the title compound 113 mg, 95% yield. White solid.  $R_f = 0.2$  in EtOAc/petroleum ether (1:5).  $^1\text{H NMR}$  (400 MHz,  $\text{CDCl}_3$ ):  $\delta$  8.55 (d,  $J = 8.0$  Hz, 2H), 8.20 (s, 1H), 7.93 (d,  $J = 8.0$  Hz, 2H), 7.45 – 7.38 (m, 3H), 7.34 (d,  $J = 6.6$  Hz, 2H), 5.62 (s, 2H), 3.11 (t,  $J = 7.5$  Hz, 4H), 1.77 – 1.37 (m, 4H), 0.88 (t,  $J = 7.2$  Hz, 6H).  $^{13}\text{C NMR}$  (100 MHz,  $\text{CDCl}_3$ ):  $\delta$  184.3, 147.9, 144.0, 139.2, 133.4, 131.2, 129.4, 129.3, 128.5, 128.4, 126.9, 54.6, 50.1, 22.0, 11.1. **MS (ESI)**  $[\text{M} + \text{H}]^+$ : calcd for  $\text{C}_{23}\text{H}_{26}\text{N}_4\text{O}_3\text{S}$ , 427.1798; found, 427.2.

**(1-benzyl-1H-1,2,3-triazol-4-yl)(4-hydroxy-3-methoxyphenyl)methanone(3af)**

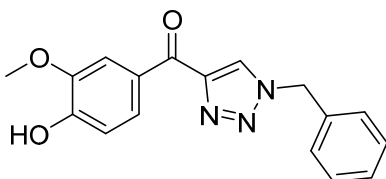

The title compound was prepared on 0.5 mmol scale following [General Procedure 3.1](#). The crude product was purified by silica gel column chromatography (10% to 40% EtOAc in petroleum ether) to afford the title compound 96 mg, 62% yield. White solid.  $R_f = 0.2$  in EtOAc/petroleum ether (1:2).  $^1\text{H NMR}$  (400 MHz,  $\text{CDCl}_3$ ):  $\delta$  8.27 (d,  $J = 8.4$  Hz, 1H), 8.14 (s, 1H), 8.03 (s, 1H), 7.46 – 7.28 (m, 5H), 7.01 (d,  $J = 8.4$  Hz, 1H), 6.25 (br, 1H), 5.59 (s, 2H), 3.97 (s, 3H).  $^{13}\text{C NMR}$  (100 MHz,  $\text{CDCl}_3$ ):  $\delta$  183.6, 150.8, 148.8, 146.4, 133.7, 129.3, 129.1, 129.0,

128.4, 128.2, 126.6, 114.0, 112.4, 56.1, 54.4. **MS (ESI)**  $[M + H]^+$ : calcd for  $C_{18}H_{15}N_3O_3$ , 310.1186; found, 310.2.

***(1-benzyl-5-phenyl-1H-1,2,3-triazol-4-yl)(phenyl)methanone (4a)***

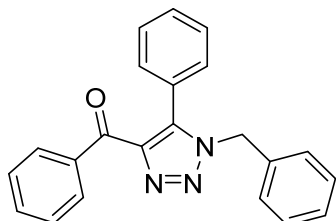

The title compound was prepared on 0.9 mmol scale following [General Procedure 3.1](#). The crude product was purified by silica gel column chromatography (0% to 30% EtOAc in petroleum ether) to afford the title compound 263 mg, 86% yield. Colorless liquid.  $R_f = 0.2$  in EtOAc/petroleum ether (1:6).  **$^1H$  NMR (400 MHz,  $CDCl_3$ )**:  $\delta$  8.36 – 8.24 (m, 2H), 7.63 – 7.54 (m, 1H), 7.50 – 7.43 (m, 5H), 7.31 – 7.24 (m, 5H), 7.12 – 7.01 (m, 2H), 5.47 (s, 2H);  **$^{13}C$  NMR (100 MHz,  $CDCl_3$ )**:  $\delta$  186.2, 143.7, 141.7, 137.0, 134.6, 132.9, 130.6, 129.9, 129.7, 128.7, 128.6, 128.3, 128.1, 127.5, 126.2, 51.9; Spectral data match those previously reported in the literature.<sup>12</sup>

***(1-benzyl-5-phenyl-1H-1,2,3-triazol-4-yl)(2-bromophenyl)methanone (4b)***

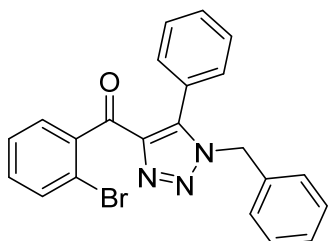

The title compound was prepared on 0.7 mmol scale following [General Procedure 3.1](#). The crude product was purified by silica gel column chromatography (0% to 40% EtOAc in petroleum ether) to afford the title compound 231 mg, 79% yield. Light yellow liquid.  $R_f = 0.3$  in EtOAc/petroleum ether (1:4).  **$^1H$  NMR (400 MHz,  $CDCl_3$ )**:  $\delta$  7.57 – 7.53 (m, 1H), 7.51 – 7.43 (m, 2H), 7.43 – 7.38 (m, 2H), 7.37 – 7.32 (m, 1H), 7.30 – 7.26 (m, 5H), 7.26 – 7.25 (m, 1H), 7.11 – 6.97 (m, 2H), 5.47 (s, 2H);  **$^{13}C$  NMR (100 MHz,  $CDCl_3$ )**:  $\delta$  187.9, 143.1, 141.2, 140.0, 134.4, 133.0, 131.4, 130.0, 129.7, 129.5, 128.6 (d,  $J = 19.9$  Hz), 128.5, 128.3, 127.3, 126.9, 125.4, 119.8, 51.9; Spectral data match those previously reported in the literature.<sup>14</sup>

***(1-benzyl-5-methyl-1H-1,2,3-triazol-4-yl)(phenyl)methanone (5a)***

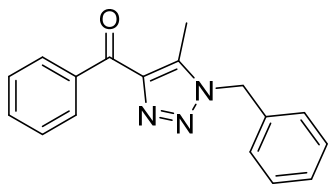

The title compound was prepared on 1.3 mmol scale following [General Procedure 3.1](#). The crude product was purified by silica gel column chromatography (0% to 20% EtOAc in petroleum ether) to afford the title compound 335 mg, 93% yield. Colorless liquid.  $R_f = 0.2$  in EtOAc/petroleum ether (1:5).  $^1\text{H NMR}$  (400 MHz,  $\text{CDCl}_3$ ):  $\delta$  8.59 – 8.12 (m, 2H), 7.63 – 7.54 (m, 1H), 7.54 – 7.44 (m, 2H), 7.39 – 7.30 (m, 3H), 7.24 – 7.15 (m, 2H), 5.56 (s, 2H), 2.55 (s, 3H);  $^{13}\text{C NMR}$  (100 MHz,  $\text{CDCl}_3$ ):  $\delta$  187.5, 143.7, 139.3, 137.3, 133.9, 132.8, 130.5, 129.1, 128.5, 128.1, 127.2, 51.7, 9.5; Spectral data match those previously reported in the literature.<sup>15</sup>

***(1-benzyl-5-methyl-1H-1,2,3-triazol-4-yl)(3-methoxyphenyl)methanone (5b)***

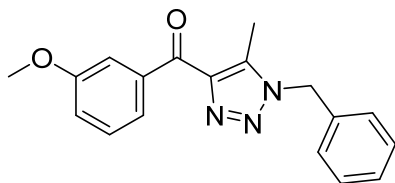

The title compound was prepared on 1.1 mmol scale following [General Procedure 3.1](#). The crude product was purified by silica gel column chromatography (0% to 20% EtOAc in petroleum ether) to afford the title compound 247 mg, 73% yield. Light yellow liquid.  $R_f = 0.3$  in EtOAc/petroleum ether (v/v = 1:5).  $^1\text{H NMR}$  (400 MHz,  $\text{CDCl}_3$ ):  $\delta$  7.99 (t,  $J = 13.1$  Hz, 1H), 7.85 (t,  $J = 8.8$  Hz, 1H), 7.45 – 7.34 (m, 4H), 7.24 – 7.19 (m, 2H), 7.16 – 7.12 (m, 1H), 5.57 (s, 2H), 3.88 (s, 3H), 2.55 (s, 3H);  $^{13}\text{C NMR}$  (100 MHz,  $\text{CDCl}_3$ ):  $\delta$  187.2, 159.5, 143.8, 139.4, 138.6, 134.0, 129.2, 129.2, 128.6, 127.3, 123.6, 119.6, 114.5, 55.4, 51.8, 9.6; **HRMS (ESI)  $m/z$   $[M + H]^+$** : calcd for  $\text{C}_{18}\text{H}_{18}\text{N}_3\text{O}_2$ , 308.1394; found, 308.1321.

***(1-benzyl-5-methyl-1H-1,2,3-triazol-4-yl)(4-chlorophenyl)methanone (5c)***

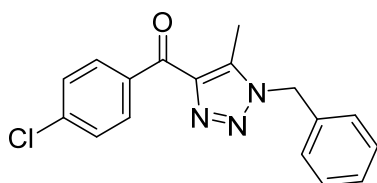

The title compound was prepared on 1.1 mmol scale following [General Procedure 3.1](#). The crude product was purified by silica gel column chromatography (0% to 20% EtOAc in petroleum ether) to afford the title compound 298 mg, 87% yield. Yellow liquid.  $R_f = 0.3$  in

EtOAc/petroleum ether (1:6). **<sup>1</sup>H NMR (400 MHz, CDCl<sub>3</sub>)**: δ 8.42 – 8.23 (m, 2H), 7.51 – 7.44 (m, 2H), 7.41 – 7.32 (m, 3H), 7.24 – 7.18 (m, 2H), 5.57 (s, 2H), 2.56 (s, 3H); **<sup>13</sup>C NMR (100 MHz, CDCl<sub>3</sub>)**: δ 186.0, 143.6, 139.6, 139.3, 135.6, 133.9, 132.1, 129.2, 128.7, 128.5, 127.3, 51.8, 9.6; **HRMS (ESI) m/z [M + H]<sup>+</sup>**: calcd for C<sub>17</sub>H<sub>15</sub>ClN<sub>3</sub>O, 312.0898; found, 312.0901.

***(1-benzyl-5-methyl-1H-1,2,3-triazol-4-yl)(pyridin-2-yl)methanone (5d)***

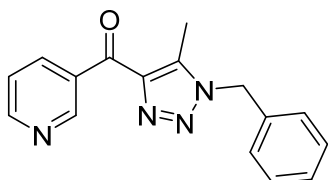

The title compound was prepared on 1.3 mmol scale following [General Procedure 3.1](#). The crude product was purified by silica gel column chromatography (0% to 40% EtOAc in petroleum ether) to afford the title compound 314 mg, 87% yield. Yellow liquid.  $R_f = 0.3$  in EtOAc/petroleum ether (1:5). **<sup>1</sup>H NMR (400 MHz, CDCl<sub>3</sub>)**: δ 9.51 (s, 1H), 8.98 – 8.57 (m, 2H), 7.49 – 7.34 (m, 4H), 7.22 (d,  $J = 6.7$  Hz, 2H), 5.60 (d,  $J = 15.5$  Hz, 2H), 2.58 (s, 3H); **<sup>13</sup>C NMR (100 MHz, CDCl<sub>3</sub>)**: δ 185.8, 152.7, 151.5, 143.4, 139.8, 138.2, 133.7, 129.2, 128.7, 127.3, 123.3, 51.8, 9.6; **HRMS (ESI) m/z [M + H]<sup>+</sup>**: calcd for C<sub>16</sub>H<sub>14</sub>N<sub>4</sub>O, 279.1240; found, 279.1238.

***(1-benzyl-5-methyl-1H-1,2,3-triazol-4-yl)(thiophen-2-yl)methanone (5e)***

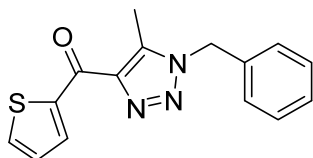

The title compound was prepared on 1.4 mmol scale following [General Procedure 3.1](#). The crude product was purified by silica gel column chromatography (0% to 40% EtOAc in petroleum ether) to afford the title compound 329 mg, 83% yield. Yellow liquid.  $R_f = 0.4$  in EtOAc/petroleum ether (1:4). **<sup>1</sup>H NMR (400 MHz, CDCl<sub>3</sub>)**: δ 8.67 (d,  $J = 3.8$  Hz, 1H), 7.71 (d,  $J = 4.9$  Hz, 1H), 7.34 (t,  $J = 6.7$  Hz, 3H), 7.21 – 7.20 (m, 3H), 5.56 (s, 2H), 2.56 (s, 3H); **<sup>13</sup>C NMR (100 MHz, CDCl<sub>3</sub>)**: δ 178.8, 143.1, 139.0, 135.9, 134.6, 133.9, 129.2, 128.6, 128.2, 127.3, 51.8, 9.5; **HRMS (ESI) m/z [M + Na]<sup>+</sup>**: calcd for C<sub>15</sub>H<sub>13</sub>N<sub>3</sub>OSNa, 306.0672; found, 306.0671.

***1-(1-benzyl-1H-1,2,3-triazol-4-yl)-2-phenylethane-1,2-dione (6a)***

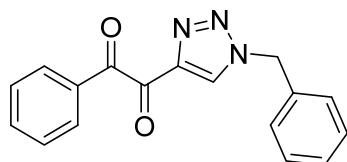

The title compound was prepared on 1.3 mmol scale following [General Procedure 3.2](#). The crude product was purified by silica gel column chromatography (0% to 20% EtOAc in petroleum ether) to afford the title compound 348 mg, 92% yield. Yellow solid. Mp: 114-116 °C.  $R_f$  = 0.2 in EtOAc/petroleum ether (1:4).  $^1\text{H NMR}$  (400 MHz,  $\text{CDCl}_3$ ):  $\delta$  8.21 (s, 1H), 8.03 – 7.97 (m, 2H), 7.67 – 7.61 (m, 1H), 7.52 – 7.46 (m, 2H), 7.42 – 7.37 (m, 3H), 7.35 – 7.30 (m, 2H), 5.60 (s, 2H);  $^{13}\text{C NMR}$  (100 MHz,  $\text{CDCl}_3$ ):  $\delta$  191.9, 185.5, 144.4, 134.9, 133.3, 132.3, 130.2, 129.4, 129.3, 128.9, 128.4, 128.2, 54.5; Spectral data match those previously reported in the literature.<sup>16</sup>

***1-(1-benzyl-1H-1,2,3-triazol-4-yl)-2-(3-methoxyphenyl)ethane-1,2-dione (6b)***

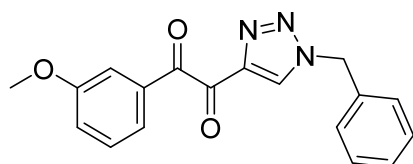

The title compound was prepared on 1.1 mmol scale following [General Procedure 3.2](#). The crude product was purified by silica gel column chromatography (0% to 20% EtOAc in petroleum ether) to afford the title compound 258 mg, 73% yield. Yellow solid. Mp: 109-111 °C.  $R_f$  = 0.3 in EtOAc/petroleum ether (1:4).  $^1\text{H NMR}$  (400 MHz,  $\text{CDCl}_3$ ):  $\delta$  8.18 (d,  $J$  = 2.6 Hz, 1H), 7.55 (d,  $J$  = 10.1 Hz, 2H), 7.44 – 7.31 (m, 6H), 7.20 (d,  $J$  = 8.2 Hz, 1H), 5.61 (s, 2H), 3.84 (t,  $J$  = 7.1 Hz, 3H);  $^{13}\text{C NMR}$  (100 MHz,  $\text{CDCl}_3$ ):  $\delta$  191.9, 185.6, 160.0, 144.6, 133.6, 133.3, 130.0, 129.5, 129.4, 128.5, 128.1, 123.5, 122.1, 113.2, 55.5, 54.6; **HRMS (ESI)  $m/z$   $[\text{M} + \text{H}]^+$** : calcd for  $\text{C}_{18}\text{H}_{16}\text{N}_3\text{O}_3$ , 322.1186; found, 322.1175.

***1-(1-benzyl-1H-1,2,3-triazol-4-yl)-2-(4-fluorophenyl)ethane-1,2-dione (6c)***

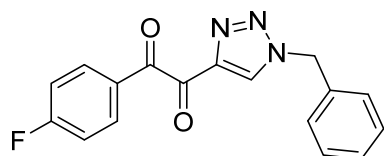

The title compound was prepared on 1.2 mmol scale following [General Procedure 3.2](#). The crude product was purified by silica gel column chromatography (0% to 20% EtOAc in petroleum ether) to afford the title compound 307 mg, 83% yield. Yellow solid.  $R_f$  = 0.2

EtOAc/petroleum ether (1:2). **<sup>1</sup>H NMR (400 MHz, CDCl<sub>3</sub>):** δ 8.31 (s, 1H), 8.05 (d, *J* = 4.7 Hz, 2H), 7.36 (d, *J* = 19.3 Hz, 5H), 7.17 (t, *J* = 7.5 Hz, 2H), 5.63 (s, 2H); **<sup>13</sup>C NMR (100 MHz, CDCl<sub>3</sub>):** δ 190.1, 185.1, 167.9, 165.4, 144.1, 133.3, 132.9 (d, *J* = 9.8 Hz), 129.2 (d, *J* = 9.7 Hz), 128.6, 128.5, 128.3, 116.3, 116.1, 54.4. **HRMS (ESI) m/z [M + H]<sup>+</sup>:** calcd for C<sub>17</sub>H<sub>13</sub>FN<sub>3</sub>O<sub>2</sub>, 310.0992; found, 310.0979.

***1-(1-benzyl-1H-1,2,3-triazol-4-yl)-2-(4-chlorophenyl)ethane-1,2-dione (6d)***

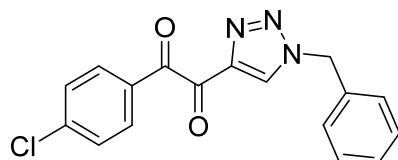

The title compound was prepared on 1.1 mmol scale following [General Procedure 3.2](#). The crude product was purified by silica gel column chromatography (0% to 20% EtOAc in petroleum ether) to afford the title compound 308 mg, 86% yield. Yellow solid. Mp: 115-117 °C. *R<sub>f</sub>* = 0.3 in EtOAc/petroleum ether (1:4). **<sup>1</sup>H NMR (400 MHz, CDCl<sub>3</sub>):** δ 8.20 (s, 1H), 7.99 – 7.96 (m, 2H), 7.52 – 7.45 (m, 2H), 7.44 – 7.37 (m, 3H), 7.33 – 7.31 (m, 2H), 5.61 (s, 2H); **<sup>13</sup>C NMR (100 MHz, CDCl<sub>3</sub>):** δ 190.5, 184.9, 144.3, 141.7, 133.2, 131.6, 130.7, 129.4, 129.4, 129.4, 128.4, 128.3, 54.6; Spectral data match those previously reported in the literature.<sup>7</sup>

***1-(1-benzyl-1H-1,2,3-triazol-4-yl)-2-(4-bromophenyl)ethane-1,2-dione (6e)***

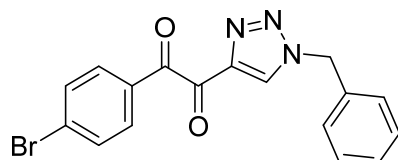

The title compound was prepared on 0.8 mmol scale following [General Procedure 3.2](#). The crude product was purified by silica gel column chromatography (0% to 20% EtOAc in petroleum ether) to afford the title compound 248 mg, 84% yield. Yellow solid. Mp: 104-107 °C. *R<sub>f</sub>* = 0.2 in EtOAc/petroleum ether (1:3). **<sup>1</sup>H NMR (400 MHz, CDCl<sub>3</sub>):** δ 8.20 (s, 1H), 7.89 (d, *J* = 8.6 Hz, 2H), 7.65 (d, *J* = 8.6 Hz, 2H), 7.44 – 7.39 (m, 3H), 7.34 – 7.32 (m, 2H), 5.61 (s, 2H); **<sup>13</sup>C NMR (100 MHz, CDCl<sub>3</sub>):** δ 190.7, 184.9, 144.3, 133.2, 132.3, 131.6, 131.1, 130.6, 129.4, 129.4, 128.4, 128.3, 54.6; **HRMS (ESI) m/z [M + H]<sup>+</sup>:** calcd for C<sub>17</sub>H<sub>13</sub>BrN<sub>3</sub>O<sub>2</sub>, 370.0186; found, 370.0177.

***1-phenyl-2-(1-phenyl-1H-1,2,3-triazol-4-yl)ethane-1,2-dione (6f)***

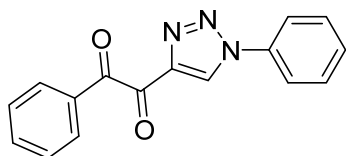

The title compound was prepared on 1.3 mmol scale following [General Procedure 3.2](#). The crude product was purified by silica gel column chromatography (0% to 30% EtOAc in petroleum ether) to afford the title compound 299 mg, 83% yield. off-White solid. Mp: 131-132 °C.  $R_f$  = 0.3 in EtOAc/petroleum ether (1:5).  $^1\text{H NMR}$  (400 MHz,  $\text{CDCl}_3$ ):  $\delta$  8.74 (s, 1H), 8.13 – 8.03 (m, 2H), 7.79 – 7.76 (m, 2H), 7.70 – 7.66 (m, 1H), 7.60 – 7.50 (m, 5H);  $^{13}\text{C NMR}$  (100 MHz,  $\text{CDCl}_3$ ):  $\delta$  191.8, 185.3, 144.6, 136.0, 135.0, 132.3, 130.3, 130.0, 129.9, 129.0, 126.4, 121.0; **HRMS (ESI) m/z**  $[\text{M}+\text{H}]^+$ : calcd for  $\text{C}_{16}\text{H}_{12}\text{N}_3\text{O}_2$ , 278.0924; found, 278.0921.

***1-(4-chlorophenyl)-2-(1-phenyl-1H-1,2,3-triazol-4-yl)ethane-1,2-dione (6g)***

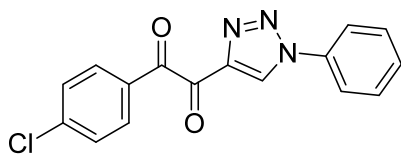

The title compound was prepared on 1.1 mmol scale following [General Procedure 3.2](#). The crude product was purified by silica gel column chromatography (0% to 20% EtOAc in petroleum ether) to afford the title compound 277 mg, 81% yield. Yellow solid. Mp: 121-123 °C.  $R_f$  = 0.3 in EtOAc/petroleum ether (1:6).  $^1\text{H NMR}$  (400 MHz,  $\text{CDCl}_3$ ):  $\delta$  8.75 (s, 1H), 8.12 – 7.97 (m, 2H), 7.83 – 7.71 (m, 2H), 7.64 – 7.46 (m, 5H);  $^{13}\text{C NMR}$  (100 MHz,  $\text{CDCl}_3$ ):  $\delta$  190.3, 184.7, 144.4, 141.8, 131.6, 130.7, 130.1, 129.9, 129.4, 126.6, 121.0; **HRMS (ESI) m/z**  $[\text{M} + \text{H}]^+$ : calcd for  $\text{C}_{16}\text{H}_{11}\text{ClN}_3\text{O}_2$ , 312.0534; found, 312.0529.

***ethyl 2-(4-(2-oxo-2-phenylacetyl)-1H-1,2,3-triazol-1-yl)acetate (6h)***

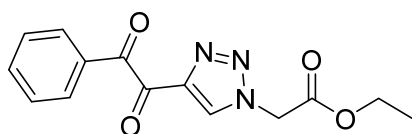

The title compound was prepared on 1.3 mmol scale following [General Procedure 3.2](#). The crude product was purified by silica gel column chromatography (0% to 20% EtOAc in petroleum ether) to afford the title compound 295 mg, 79% yield. Yellow liquid.  $R_f$  = 0.3 in EtOAc/petroleum ether (1:5).  $^1\text{H NMR}$  (400 MHz,  $\text{CDCl}_3$ ):  $\delta$  8.50 (s, 1H), 8.11 – 7.98 (m, 2H), 7.71 – 7.58 (m, 1H), 7.58 – 7.47 (m, 2H), 5.24 (d,  $J$  = 12.0 Hz, 2H), 4.54 – 4.17 (m, 2H), 1.57 – 1.04 (m, 3H);  $^{13}\text{C NMR}$  (100 MHz,  $\text{CDCl}_3$ ):  $\delta$  191.7, 185.4, 165.4, 144.5, 135.0, 132.3, 130.3, 130.0, 128.9, 62.9, 51.0, 14.0; **HRMS (ESI) m/z**  $[\text{M} + \text{H}]^+$ : calcd for  $\text{C}_{14}\text{H}_{14}\text{N}_3\text{O}_4$ , 288.0979;

found, 288.0978.

***1-(1-benzyl-1H-1,2,3-triazol-4-yl)-2-(thiophen-2-yl)ethane-1,2-dione (6i)***

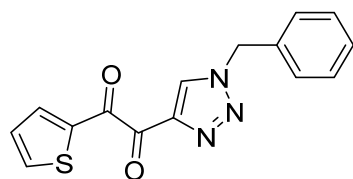

The title compound was prepared on 1.3 mmol scale following [General Procedure 3.2](#). The crude product was purified by silica gel column chromatography (0% to 20% EtOAc in petroleum ether) to afford the title compound 235 mg, 61% yield. Yellow solid.  $R_f = 0.3$  in EtOAc/petroleum ether (1:4).  **$^1\text{H NMR}$  (400 MHz,  $\text{CDCl}_3$ ):**  $\delta$  8.38 (s, 1H), 8.10 (s, 1H), 7.85 (s, 1H), 7.36 (d,  $J = 27.9$  Hz, 5H), 7.20 (d,  $J = 3.3$  Hz, 1H), 5.62 (s, 2H);  **$^{13}\text{C NMR}$  (100 MHz,  $\text{CDCl}_3$ ):**  $\delta$  194.23, 181.49, 142.95, 138.19, 137.9, 137.6, 133.4, 129.7, 129.4 (, 129.3, 128.8, 128.4, 54.5; **HRMS (ESI)  $m/z$**   $[\text{M} + \text{H}]^+$ : calcd for  $\text{C}_{15}\text{H}_{12}\text{N}_3\text{O}_2\text{S}$ , 298.0650; found, 298.0645.

***1-(1-benzyl-1H-1,2,3-triazol-4-yl)-2-(furan-2-yl)ethane-1,2-dione (6j)***

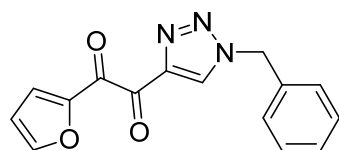

The title compound was prepared on 1.4 mmol scale following [General Procedure 3.2](#). The crude product was purified by silica gel column chromatography (0% to 20% EtOAc in petroleum ether) to afford the title compound 263 mg, 67% yield. Yellow solid.  $R_f = 0.3$  in EtOAc/petroleum ether (1:4).  **$^1\text{H NMR}$  (400 MHz,  $\text{CDCl}_3$ ):**  $\delta$  8.40 (s, 1H), 7.73 (d,  $J = 21.2$  Hz, 2H), 7.35 (d,  $J = 24.9$  Hz, 5H), 6.63 (s, 1H), 5.61 (s, 2H);  **$^{13}\text{C NMR}$  (101 MHz,  $\text{CDCl}_3$ ):**  $\delta$  181.0, 176.7, 149.6, 149.1, 142.8, 133.4, 129.7, 129.3, 129.2, 128.3, 125.2, 113.2, 54.5; **HRMS (ESI)  $m/z$**   $[\text{M} + \text{H}]^+$ : calcd for  $\text{C}_{15}\text{H}_{12}\text{N}_3\text{O}_3$ , 282.0879; found, 282.0873.

***1-(1-(4-fluorobenzyl)-1H-1,2,3-triazol-4-yl)-2-(furan-2-yl)ethane-1,2-dione (6k)***

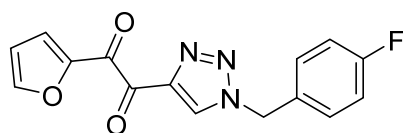

The title compound was prepared on 1.4 mmol scale following [General Procedure 3.2](#). The crude product was purified by silica gel column chromatography (0% to 20% EtOAc in



petroleum ether) to afford the title compound 259 mg, 62% yield. Yellow solid.  $R_f = 0.3$  in EtOAc/petroleum ether (1:3).  $^1\text{H NMR}$  (400 MHz,  $\text{CDCl}_3$ ):  $\delta$  8.42 (s, 1H), 7.76 (d,  $J = 14.9$  Hz, 2H), 7.33 (s, 2H), 7.10 (t,  $J = 7.7$  Hz, 2H), 6.64 (s, 1H), 5.60 (s, 2H);  $^{13}\text{C NMR}$  (100 MHz,  $\text{CDCl}_3$ ):  $\delta$  180.9, 176.6, 149.7, 149.1, 142.9, 130.3 (d,  $J = 8.4$  Hz), 129.6, 125.4, 116.6, 116.3, 113.3, 53.7; **HRMS (ESI) m/z**  $[\text{M} + \text{H}]^+$ : calcd for  $\text{C}_{15}\text{H}_{11}\text{FN}_3\text{O}_3$ , 300.0784; found, 300.0779.

***1-benzyl-1H-naphtho[2,3-d][1,2,3]triazole-4,9-dione (8)***

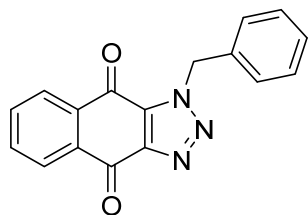

The title compound was prepared on 1.2 mmol scale following [General Procedure 3.2](#). The crude product was purified by silica gel column chromatography (0% to 20% EtOAc in petroleum ether) to afford the title compound 271 mg, 78% yield. Brown solid. Mp: 194–196 °C.  $R_f = 0.2$  in EtOAc/petroleum ether (1:4).  $^1\text{H NMR}$  (400 MHz,  $\text{CDCl}_3$ ):  $\delta$  8.37 – 8.26 (m, 1H), 8.26 – 8.18 (m, 1H), 7.87 – 7.76 (m, 2H), 7.54 – 7.46 (m, 2H), 7.39 – 7.31 (m, 3H), 6.01 (s, 2H);  $^{13}\text{C NMR}$  (100 MHz,  $\text{CDCl}_3$ ):  $\delta$  176.7, 175.3, 145.6, 135.2, 134.2, 133.8, 133.4, 133.1, 132.8, 129.0, 128.6, 127.8, 127.4, 53.8; Spectral data match those previously reported in the literature.<sup>17</sup>

## 6. References

- 1 L. Tang, C. Huang, J. Zhong, J. He, J. Guo, M. Liu, J.-P. Xu, H.-T. Wang and Z.-Z. Zhou, *Eur. J. Med. Chem.*, 2019, **168**, 221-231.
- 2 B. P. Joshi, A. Sharma and A. K. Sinha, *Can. J. Chem.*, 2005, **83**, 1826-1832.
- 3 X.-W. Zhang, G.-Q. Jiang, S.-H. Lei, X.-H. Shan, J.-P. Qu and Y.-B. Kang, *Org. Lett.*, 2021, **23**, 1611-1615.
- 4 Y. Lan, P. Fan, X.-W. Liu, F.-F. Meng, T. Ahmad, Y.-H. Xu and T.-P. Loh, *Chem. Commun.*, 2017, **53**, 12353-12356.
- 5 T. Kashiwabara and M. Tanaka, *J. Org. Chem.*, 2009, **74**, 3958-3961.
- 6 L. W. Habel, S. De Keersmaecker, J. Wahlen, P. A. Jacobs and D. E. De Vos, *Tetrahedron Lett.*, 2004, **45**, 4057-4059.
- 7 J. Thomas, V. Goyvaerts, S. Liekens and W. Dehaen, *Chem. Eur. J.*, 2016, **22**, 9966-9970.
- 8 M. A. Pinto Martins, G. C. Paveglio, L. V. Rodrigues, C. P. Frizzo, N. Zanatta and H. G. Bonacorso, *New J. Chem.*, 2016, **40**, 5989-5992.
- 9 J.-X. Zhang, Y.-J. Wang, N.-X. Wang, W. Zhang, C.-B. Bai, Y.-H. Li and J.-L. Wen, *Synlett*, 2014, **25**, 1621-1625.
- 10 P. M. Diz, A. Coelho, A. El Maatougui, J. Azuaje, O. Caamano, A. Gil and E. Sotelo, *J. Org. Chem.*, 2013, **78**, 6540-6549.
- 11 Y. Liu, G. Nie, Z. Zhou, L. Jia and Y. Chen, *J. Org. Chem.*, 2017, **82**, 9198-9203.
- 12 D. Janreddy, V. Kavala, C.-W. Kuo, W.-C. Chen, C. Ramesh, T. Kotipalli, T.-S. Kuo, M.-L. Chen, C.-H. He and C.-F. Yao, *Adv. Synth. Catal.*, 2013, **355**, 2918-2927.
- 13 S. Hwang, H. Bae, S. Kim and S. Kim, *Tetrahedron*, 2012, **68**, 1460-1465.
- 14 Y. Wang, P. Yu, Q. Ren, F. Jia, Y. Chen and A. Wu, *J. Org. Chem.*, 2020, **85**, 2688-2696.
- 15 A. De Nino, V. Algieri, M. A. Tallarida, P. Constanzo, M. Pedron, T. Tejero, P. Merino and L. Maiuolo, *Eur. J. Org. Chem.*, 2019, **2019**, 5725-5731.
- 16 C. Menendez, S. Gau, S. Ladeira, C. Lherbet and M. Baltas, *Eur. J. Org. Chem.*, 2012, **2012**, 409-416.
- 17 D. Gangaprasad, J. P. Raj, T. Kiranmye, K. Karthikeyan and J. Elangovan, *Eur. J. Org. Chem.*, 2016, **2016**, 5642-5646.

## 7. $^1\text{H}$ and $^{13}\text{C}$ NMR spectra of products

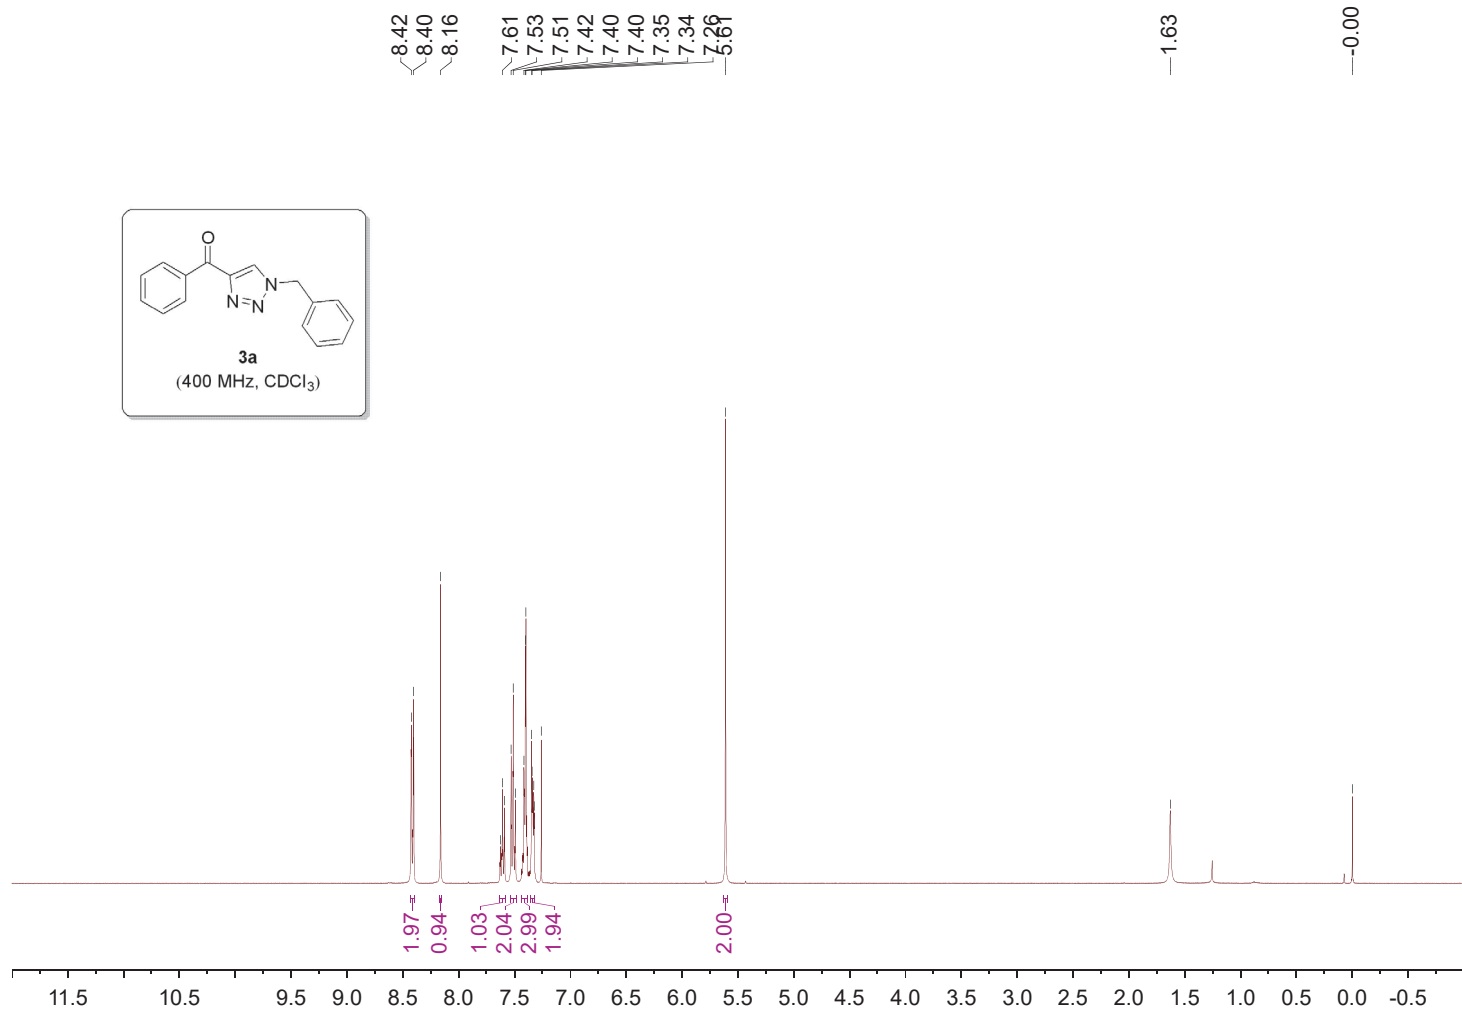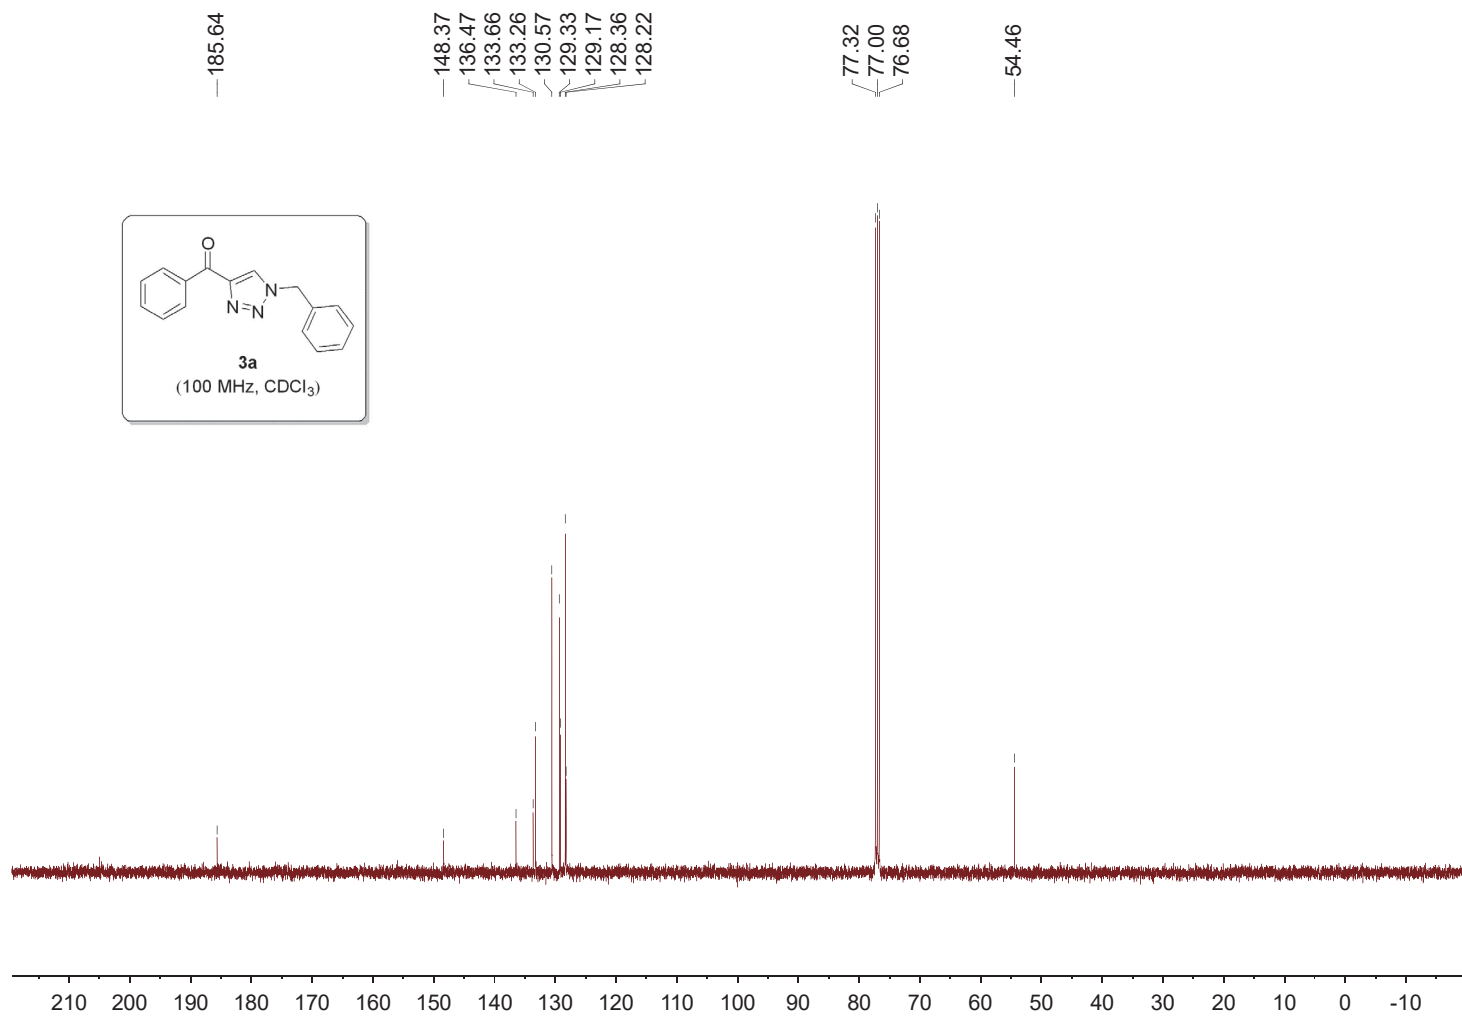

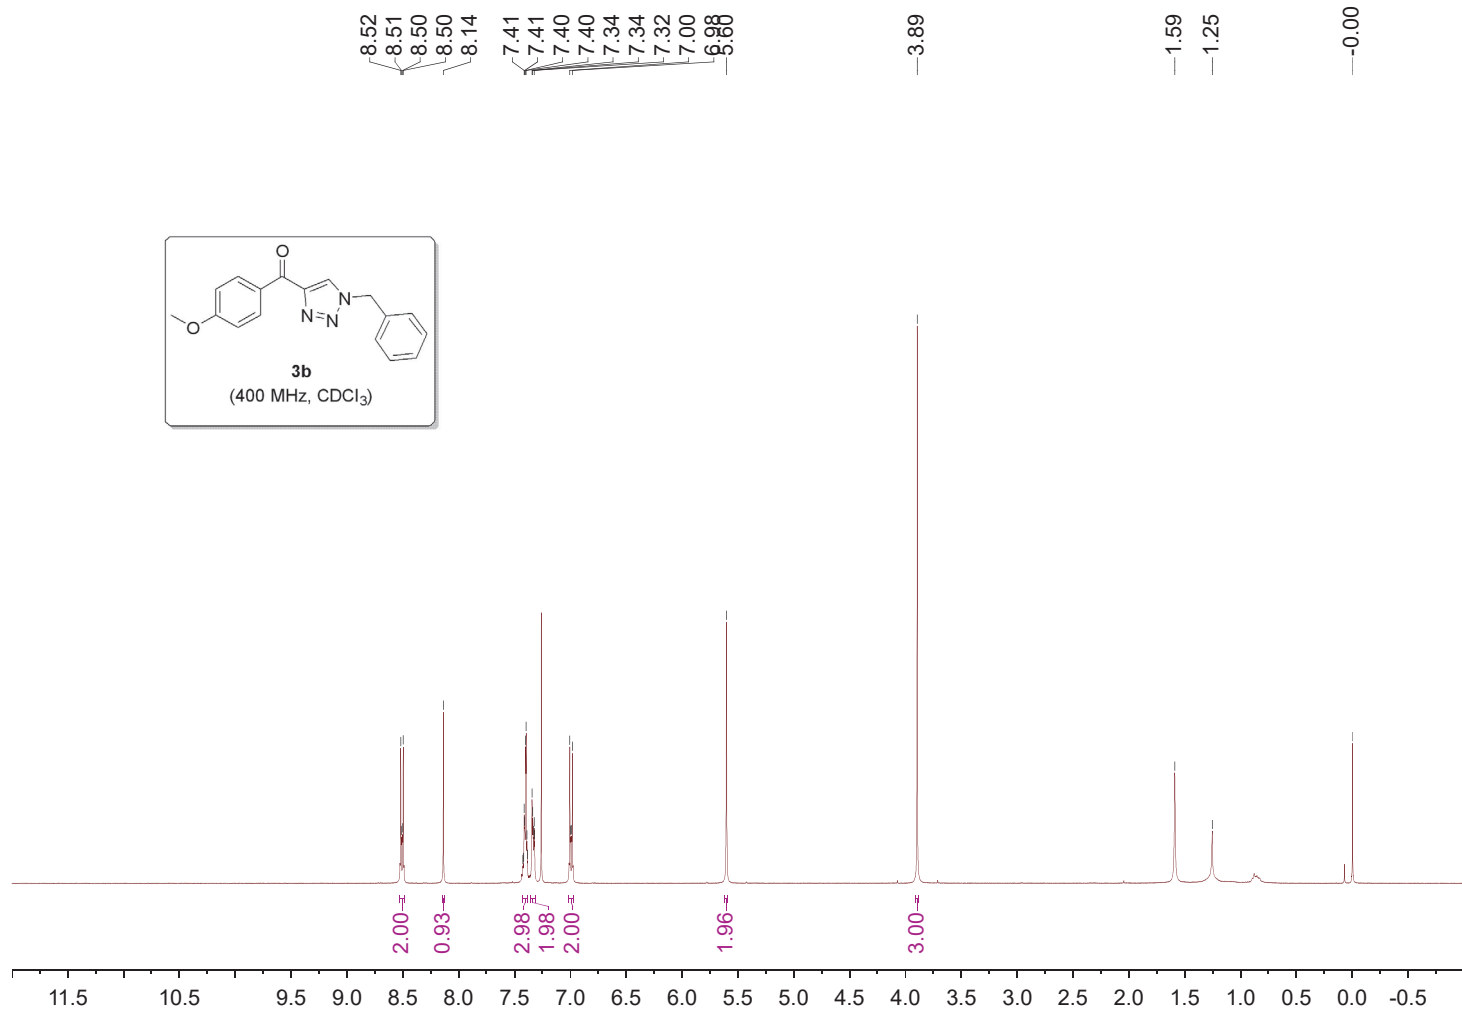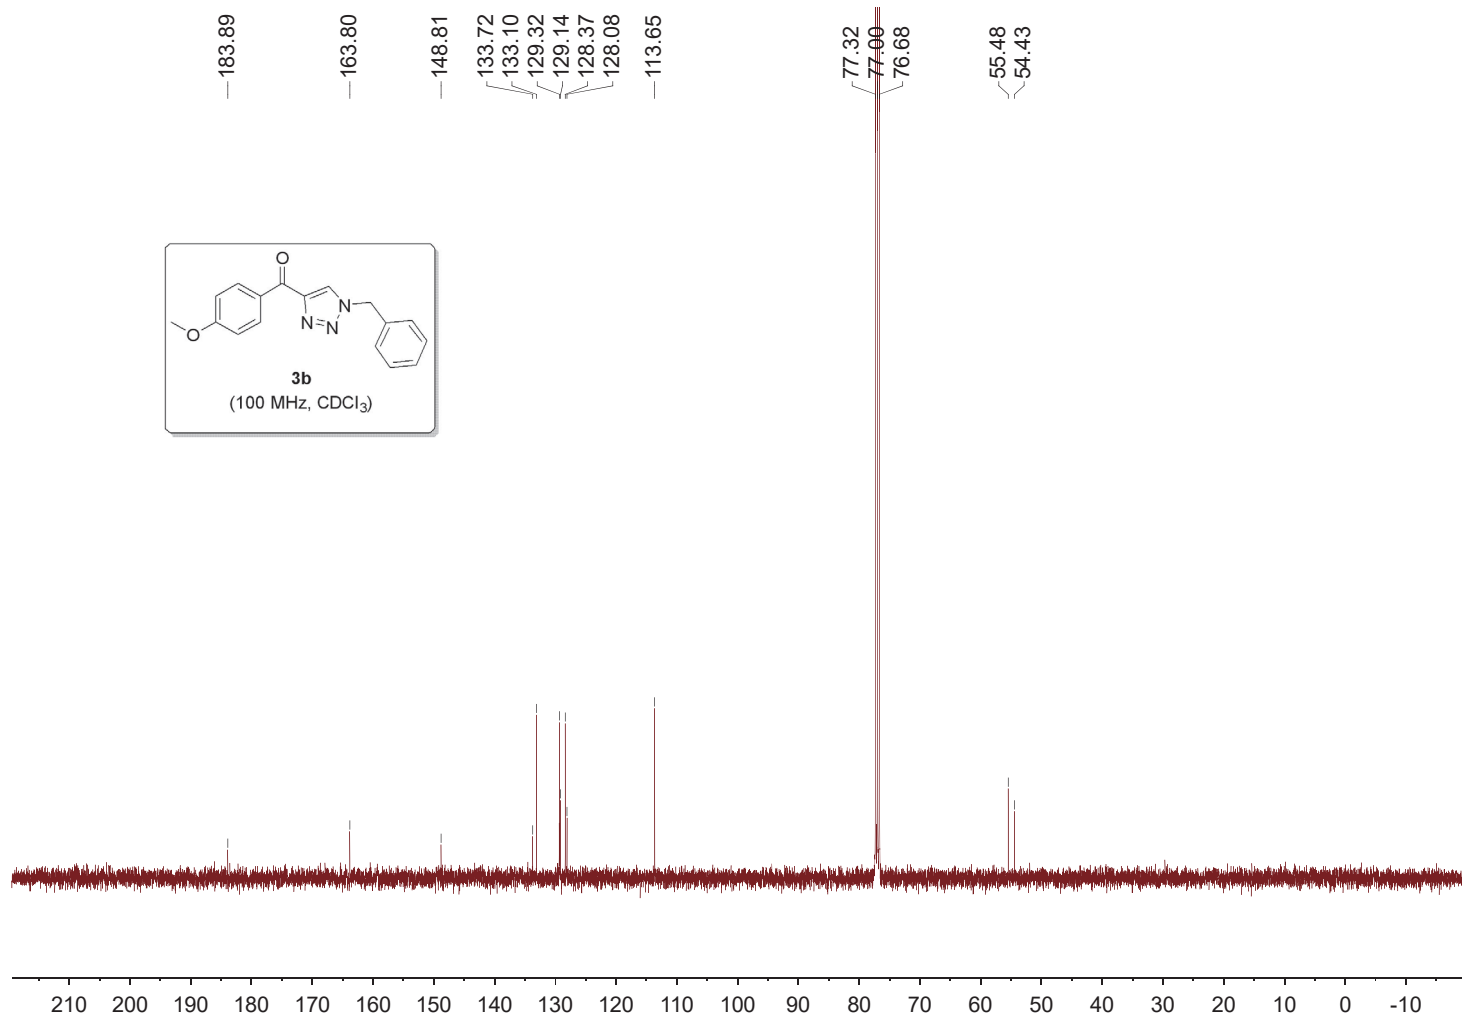

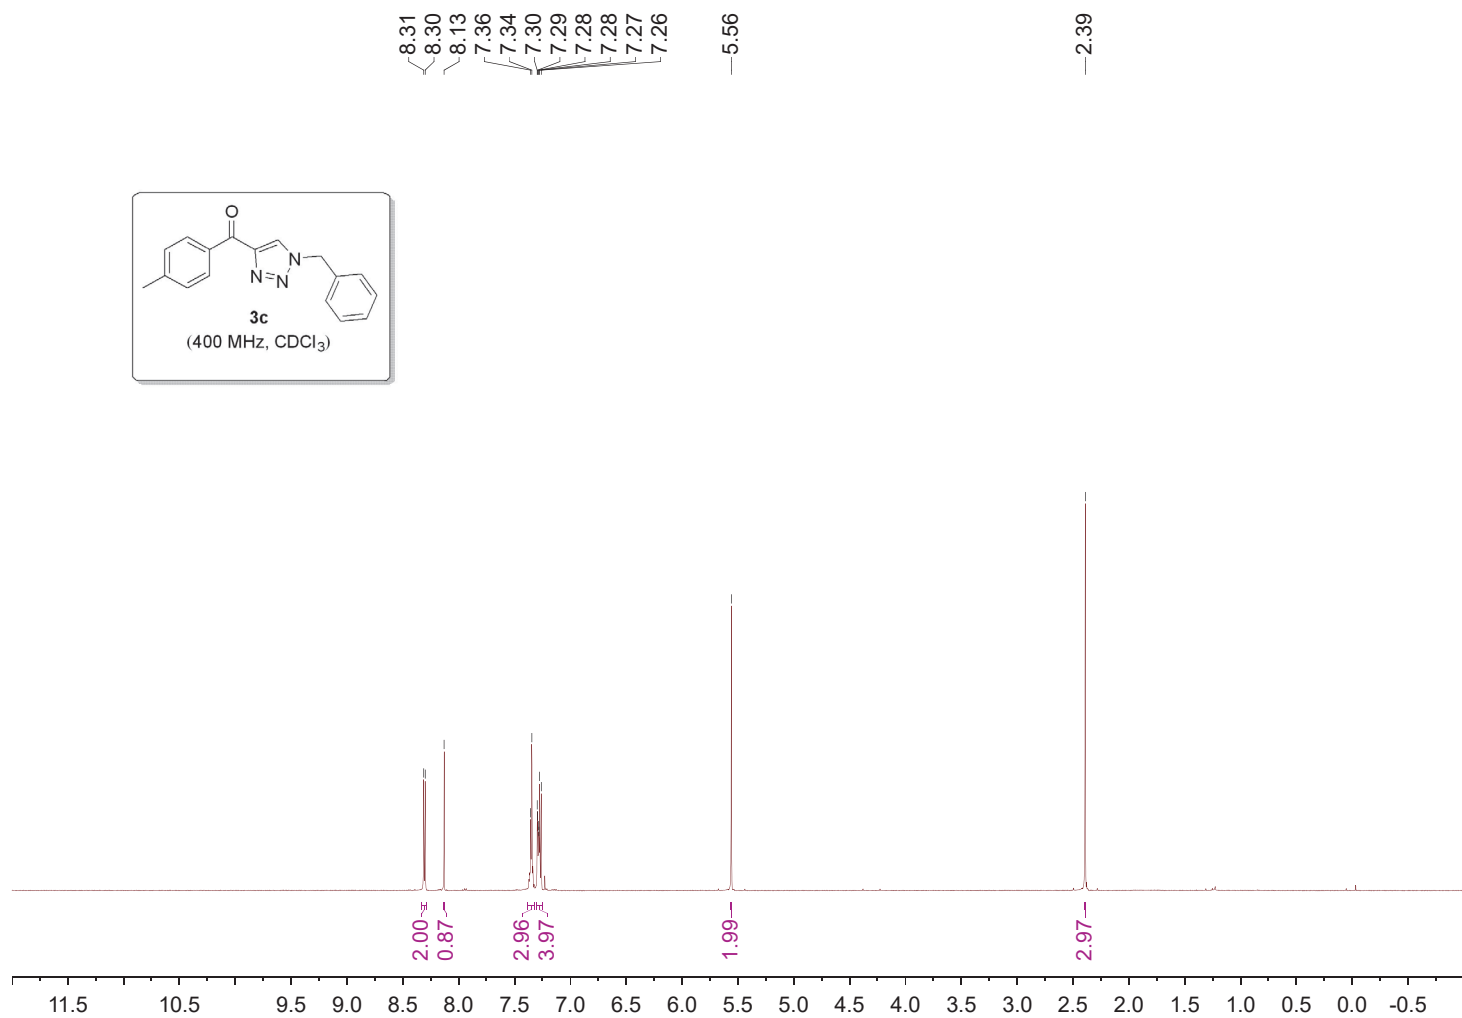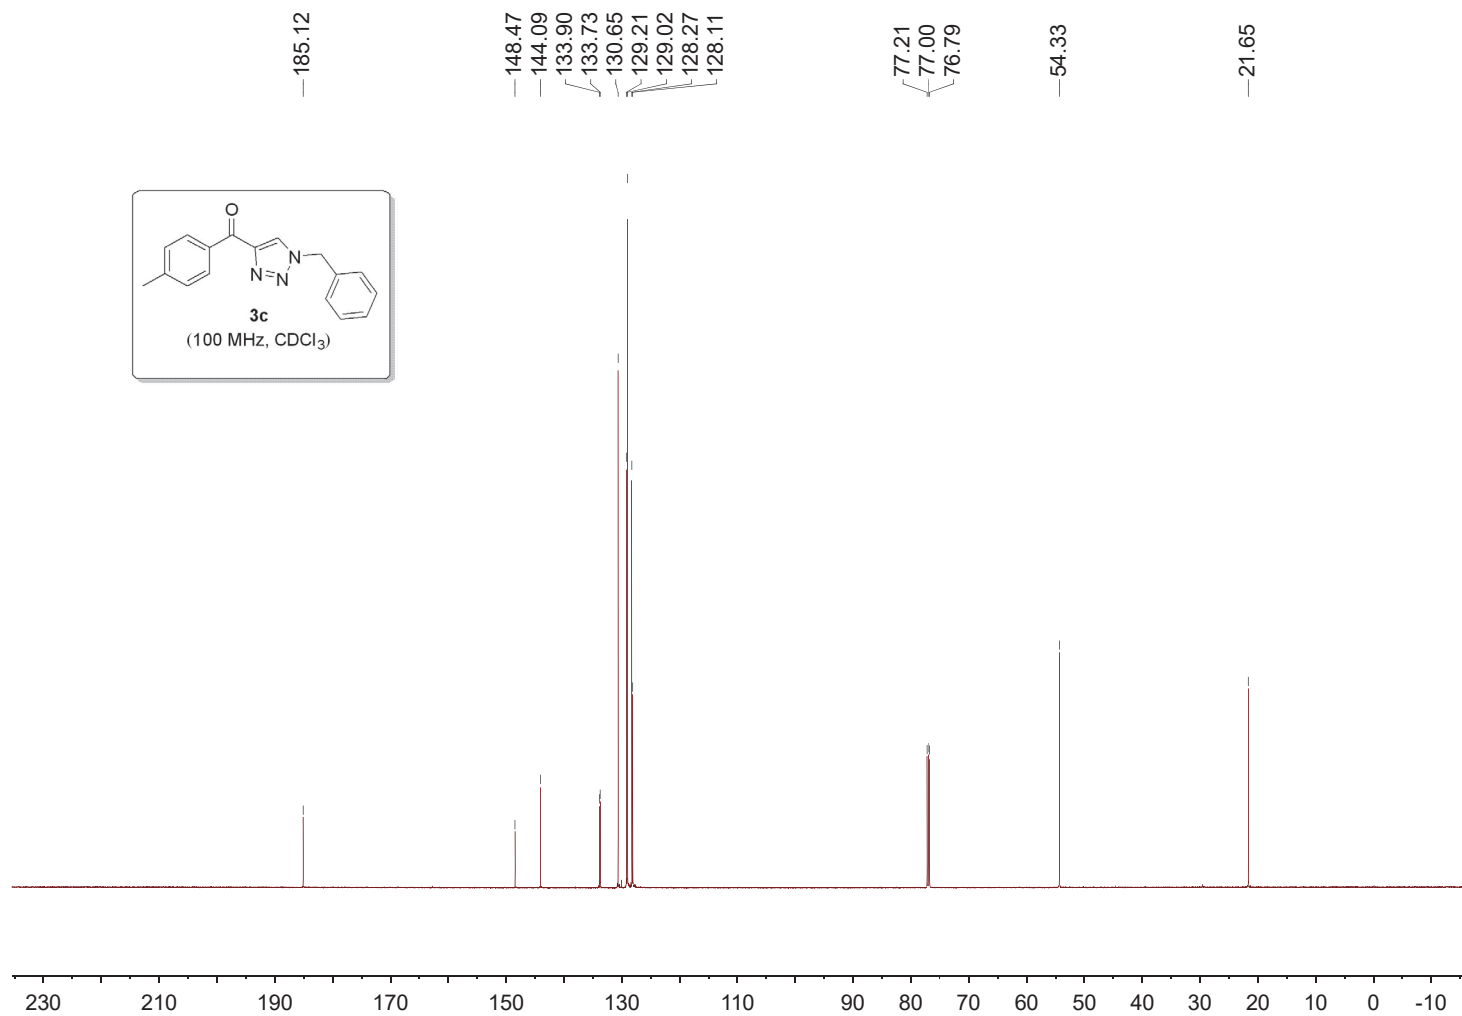

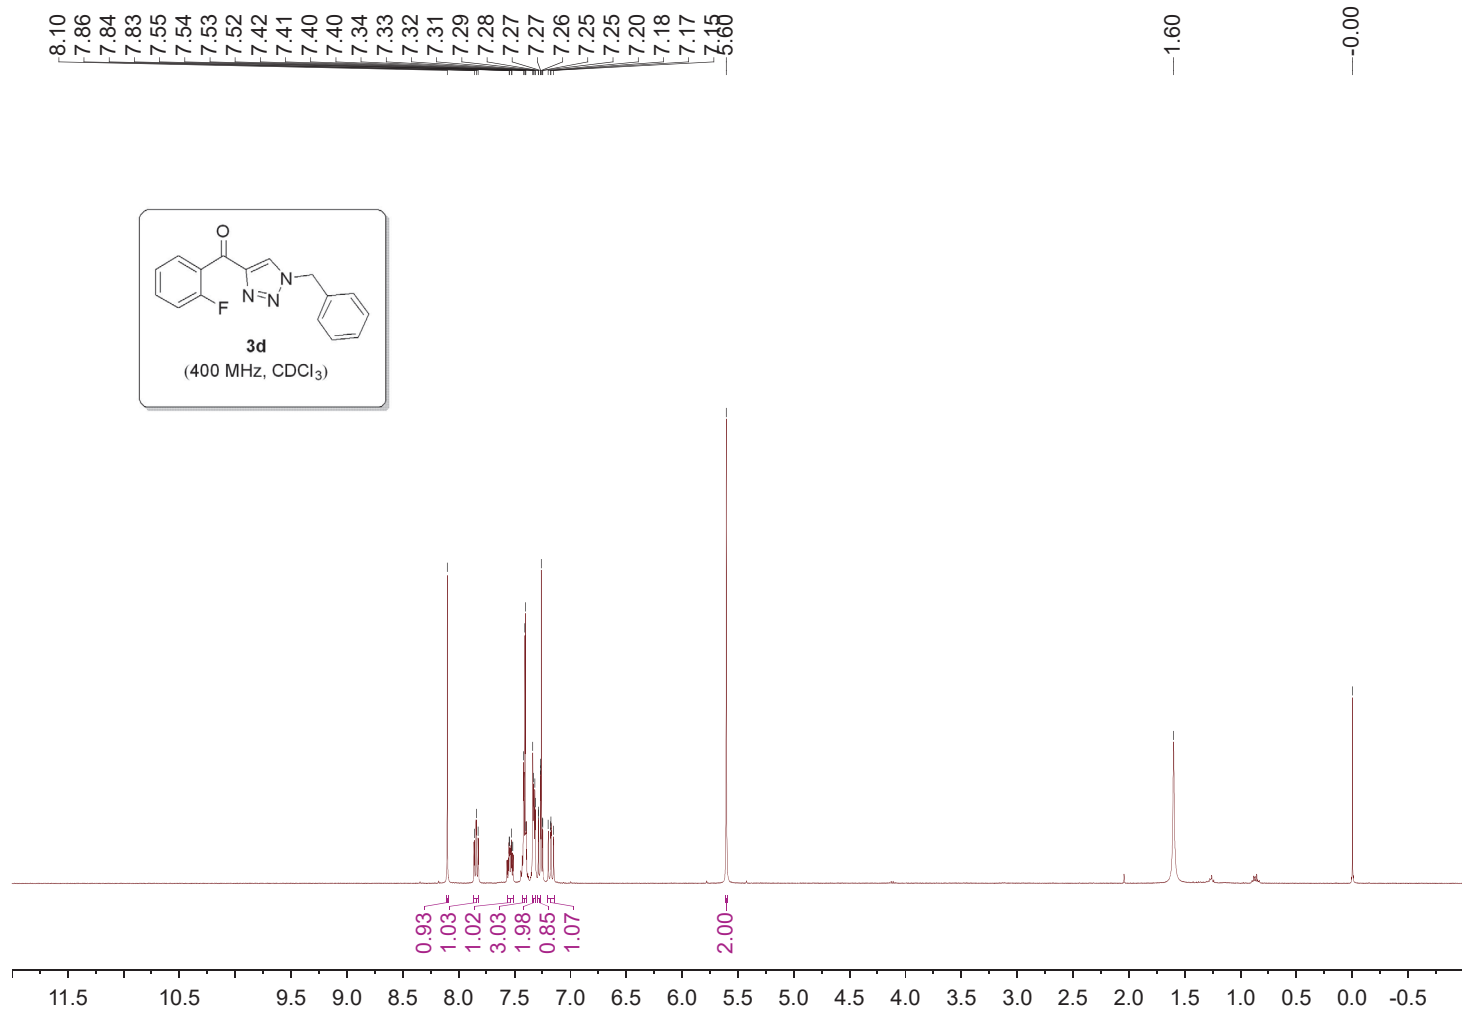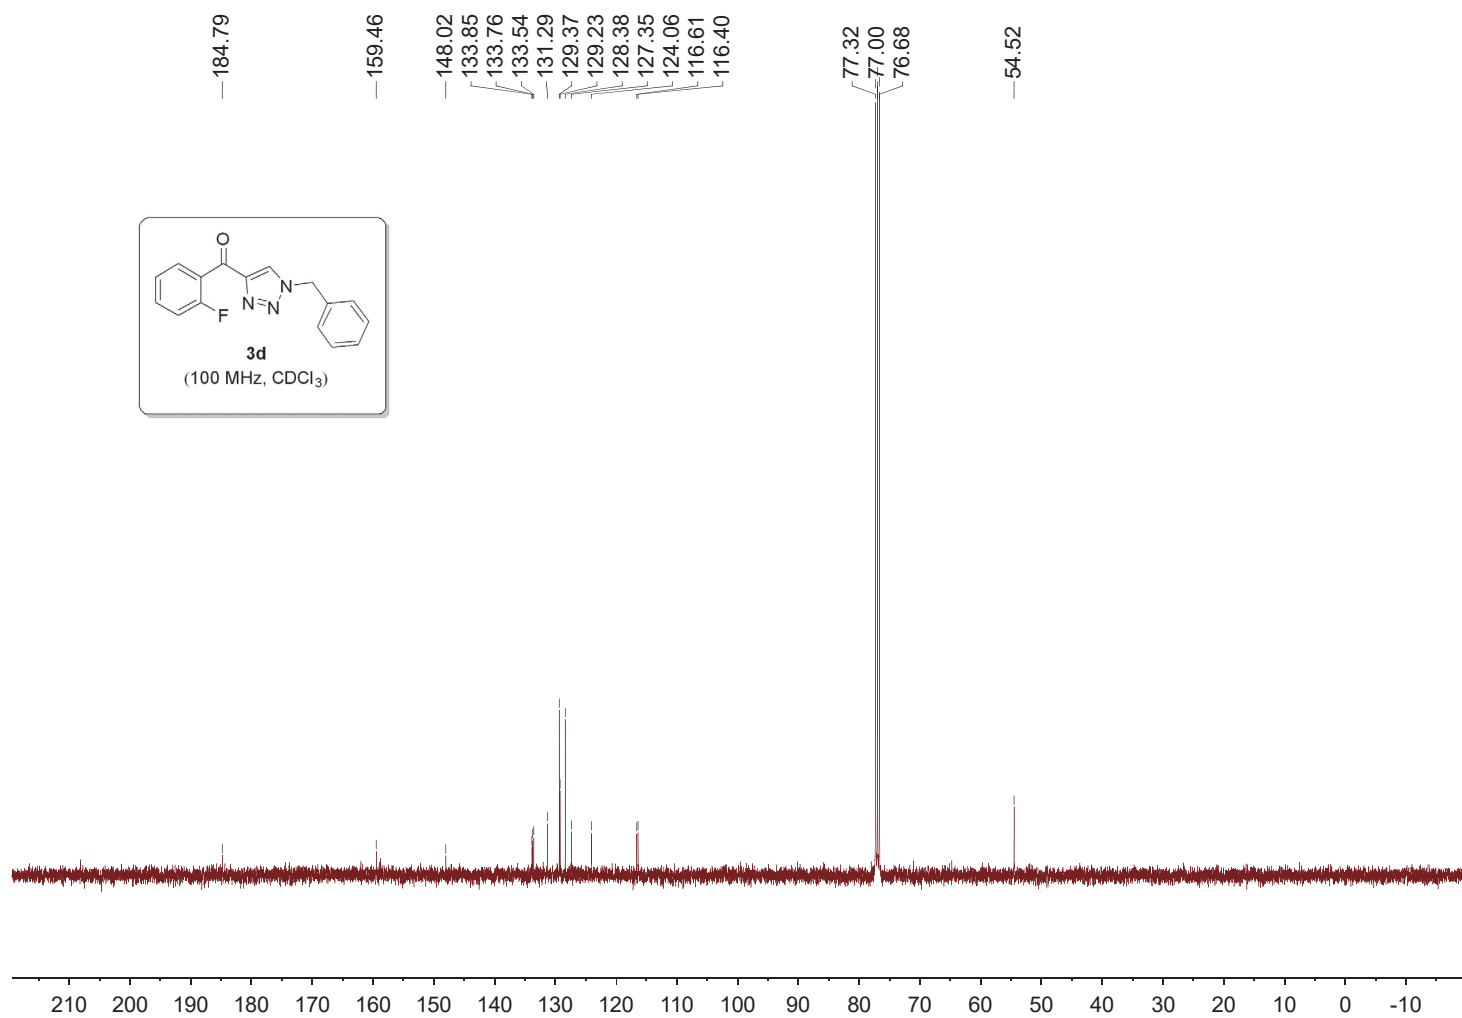

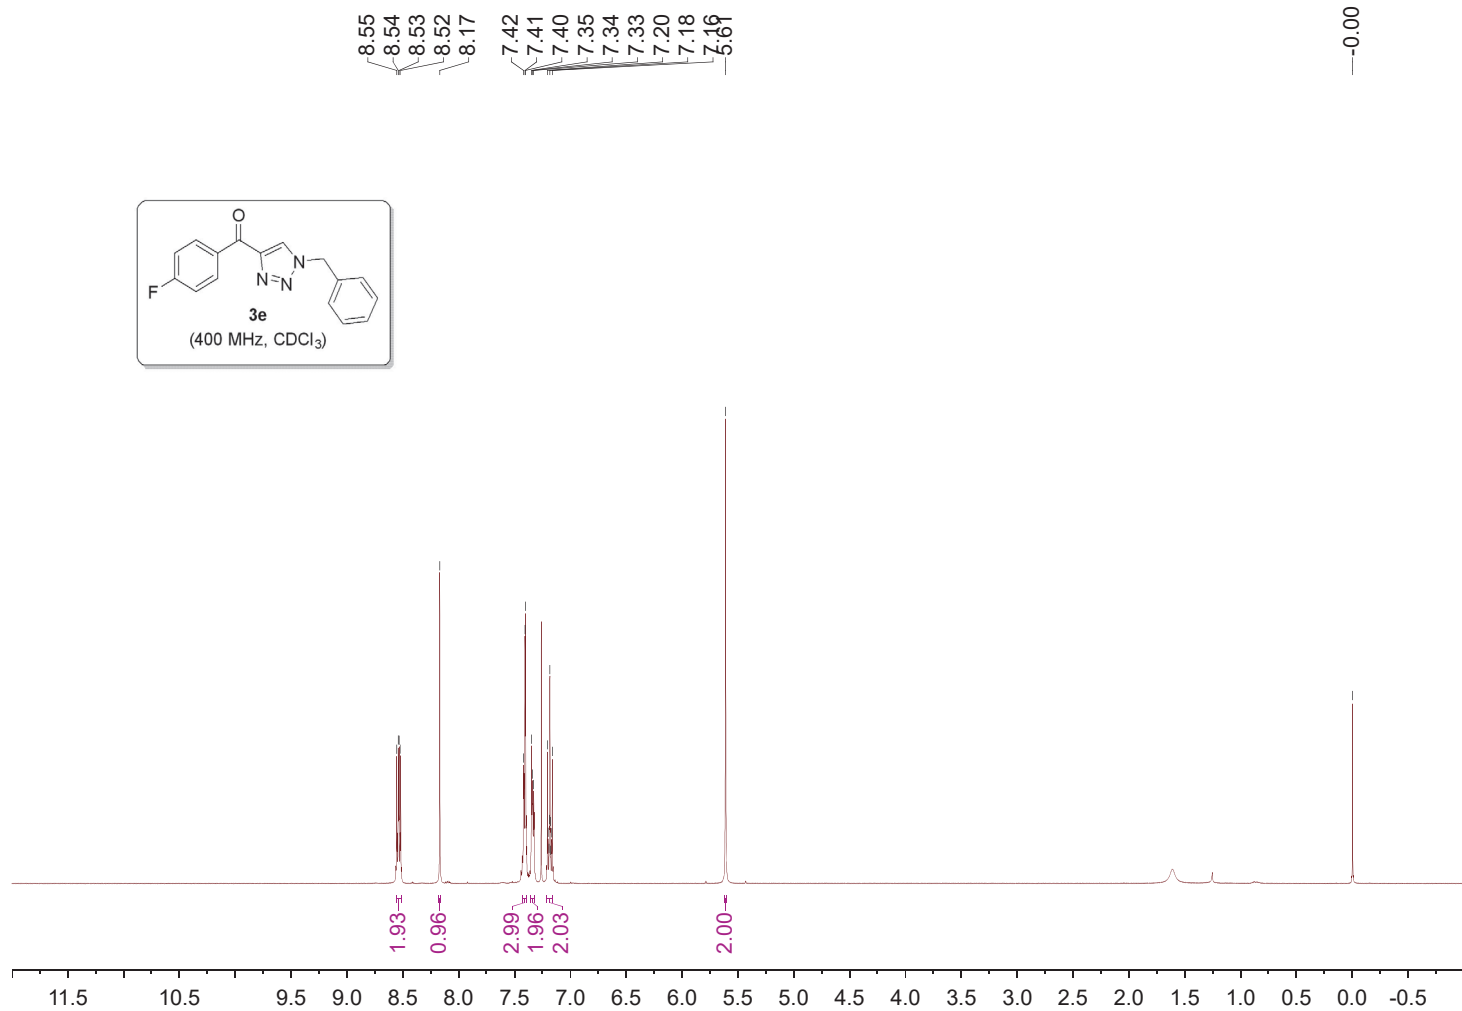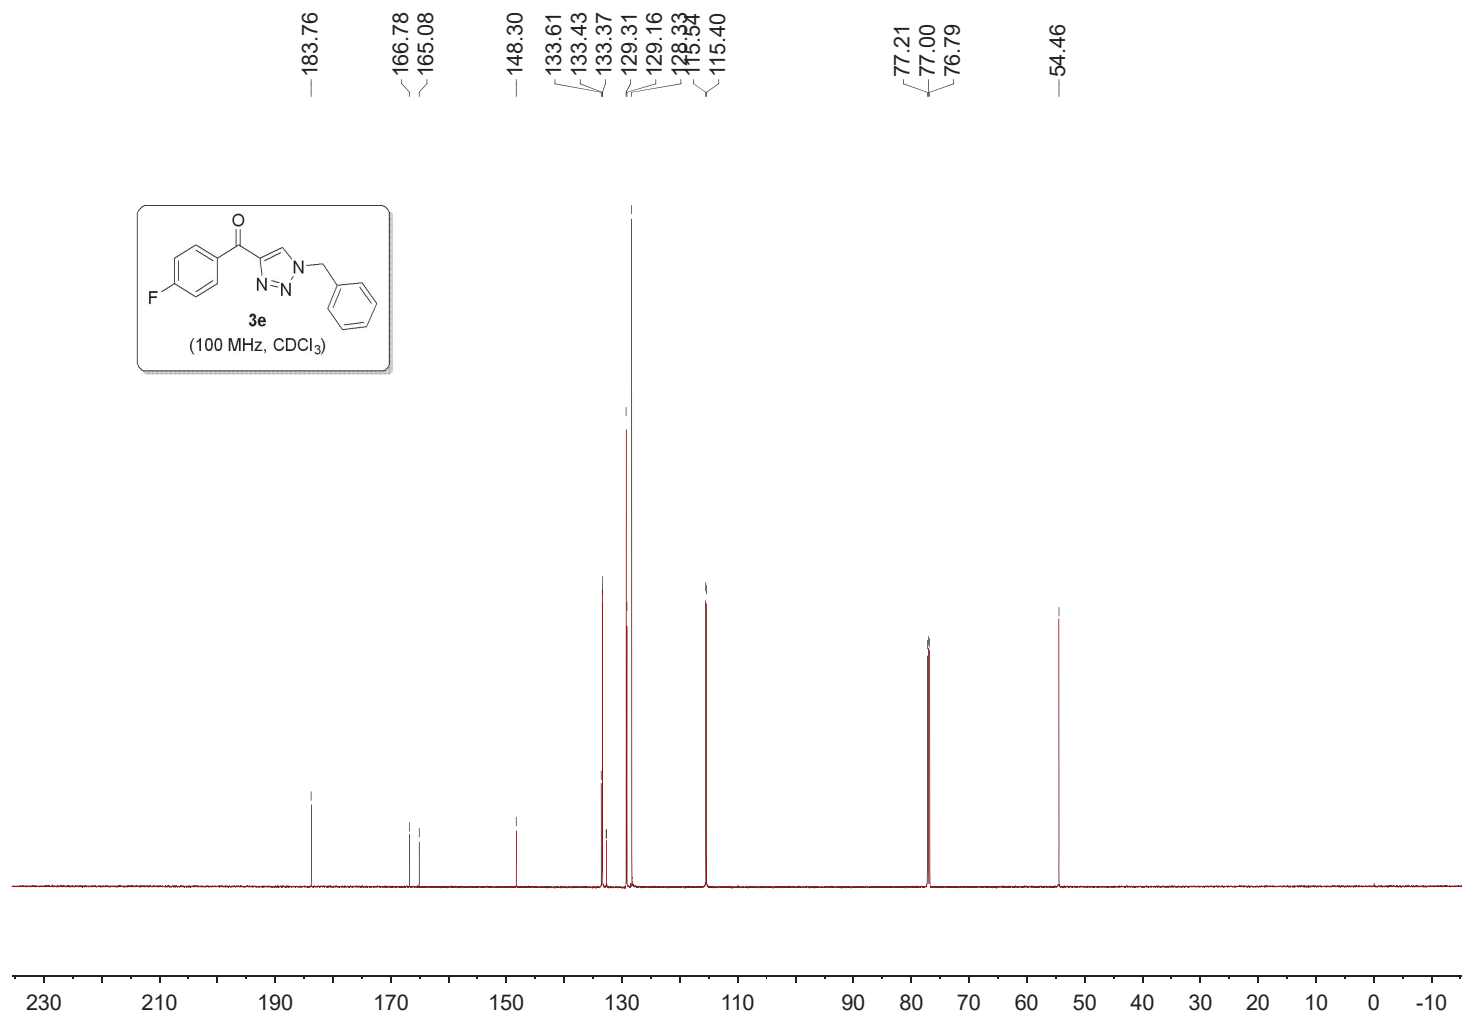

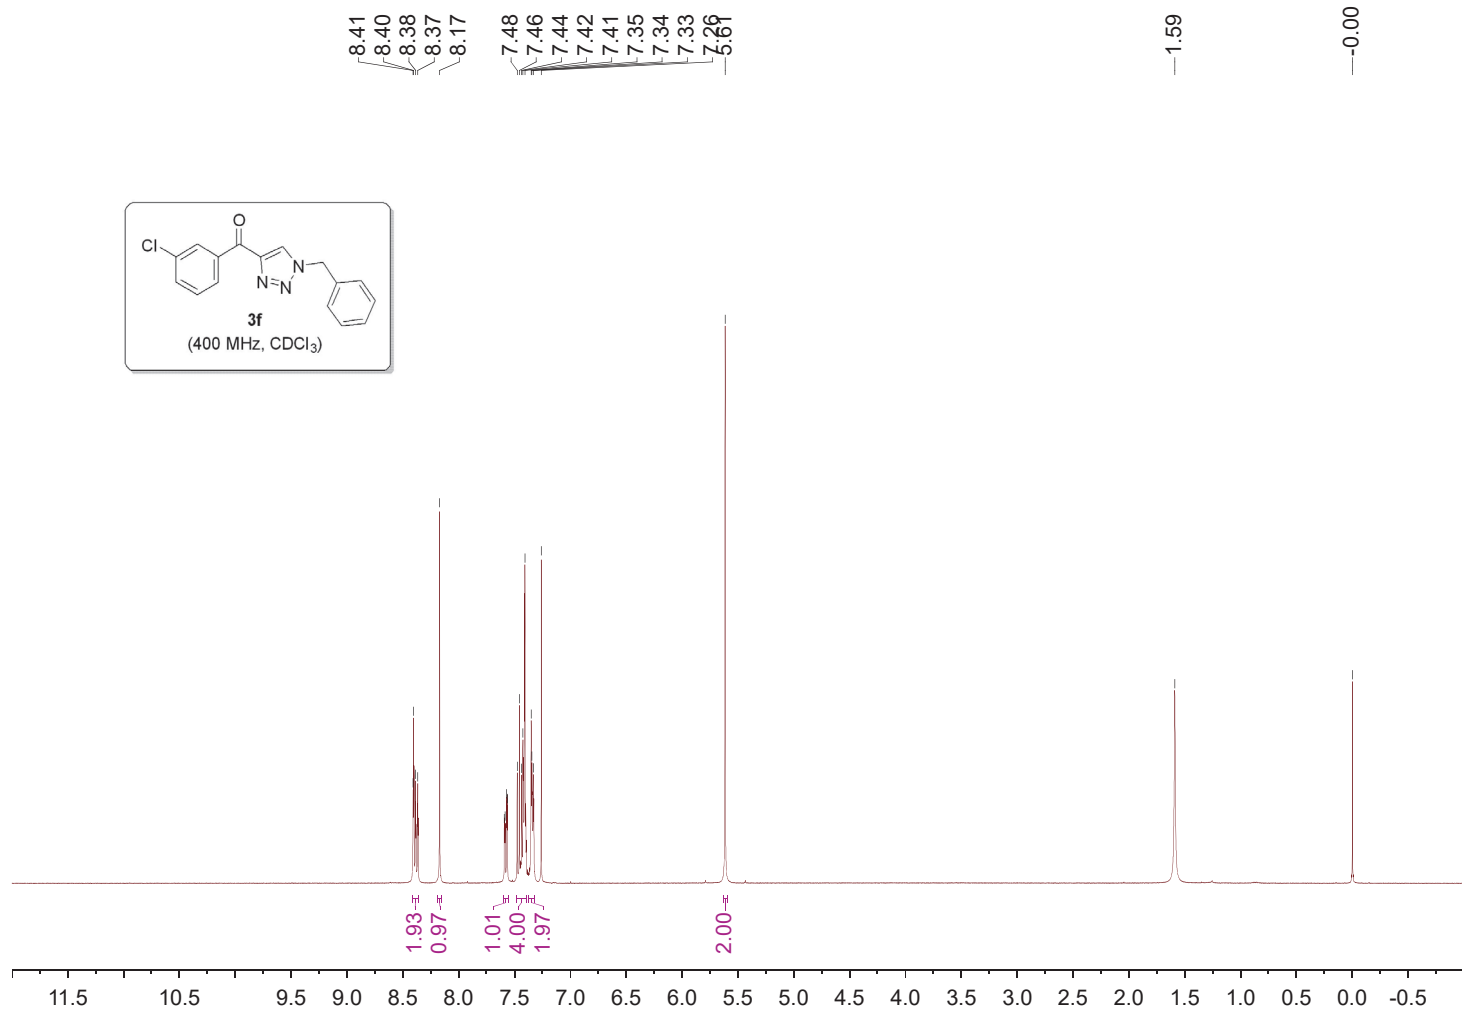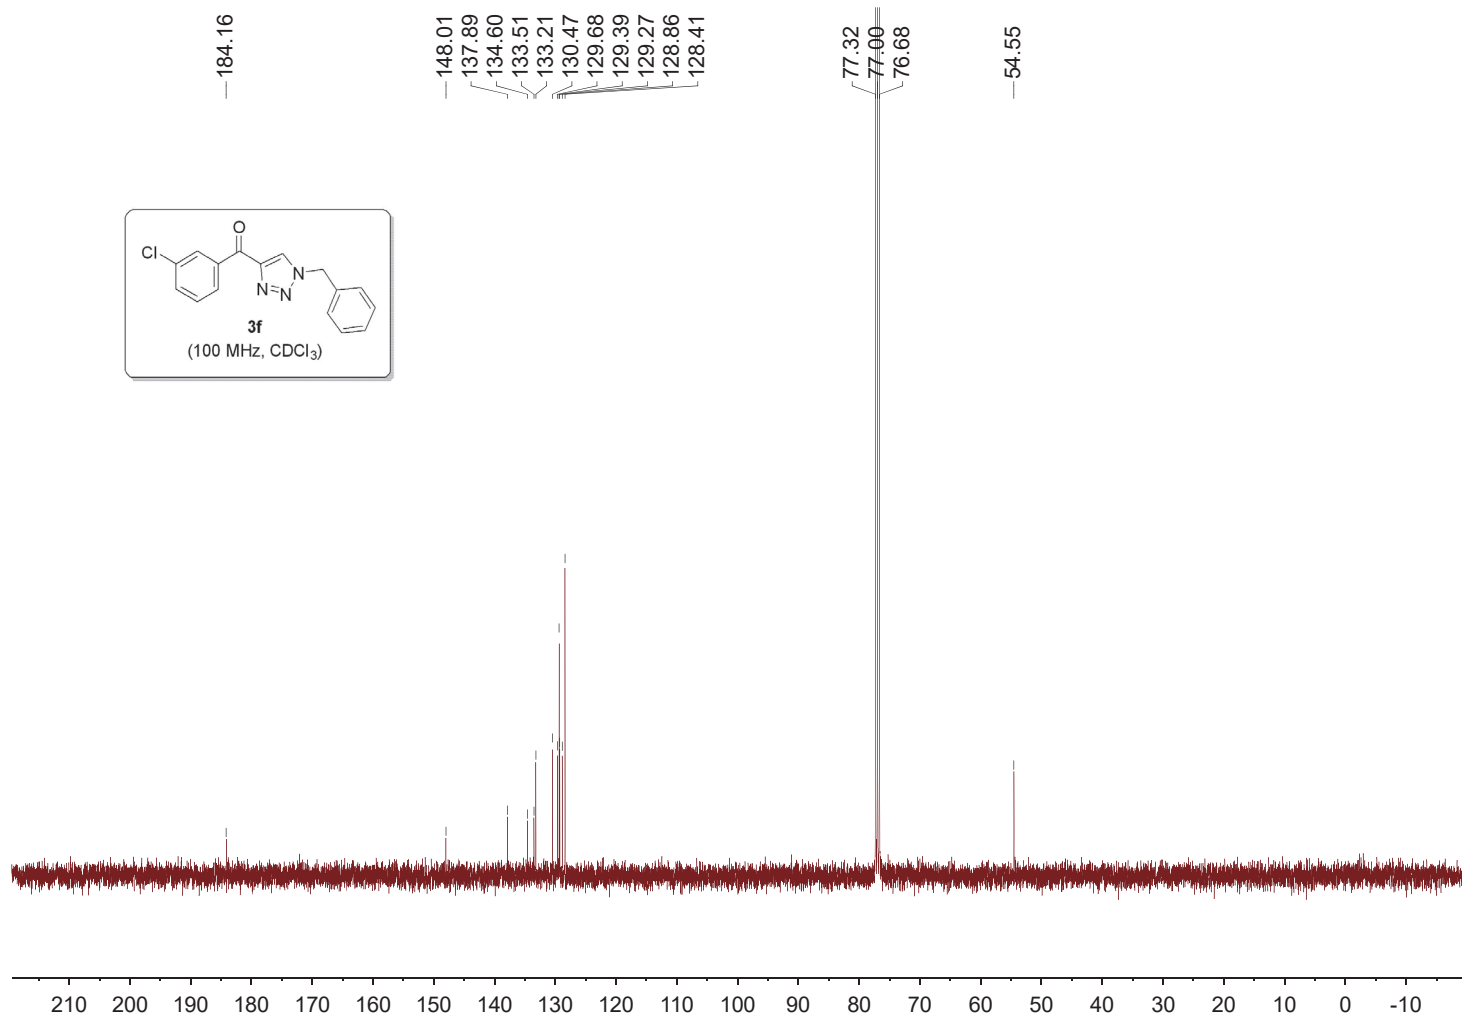



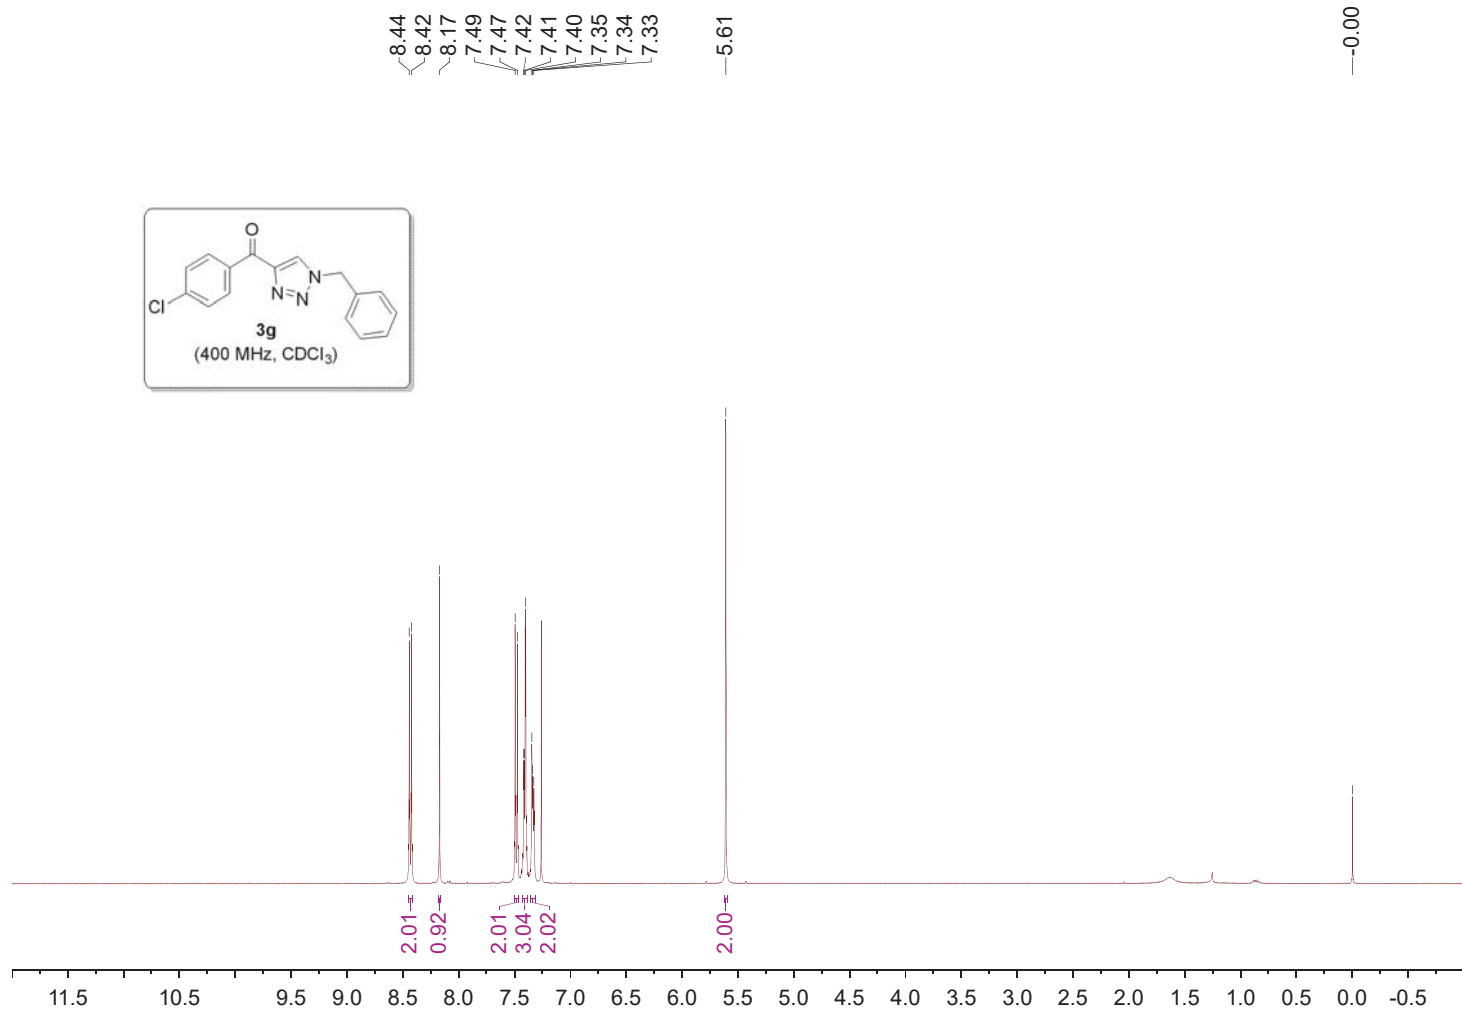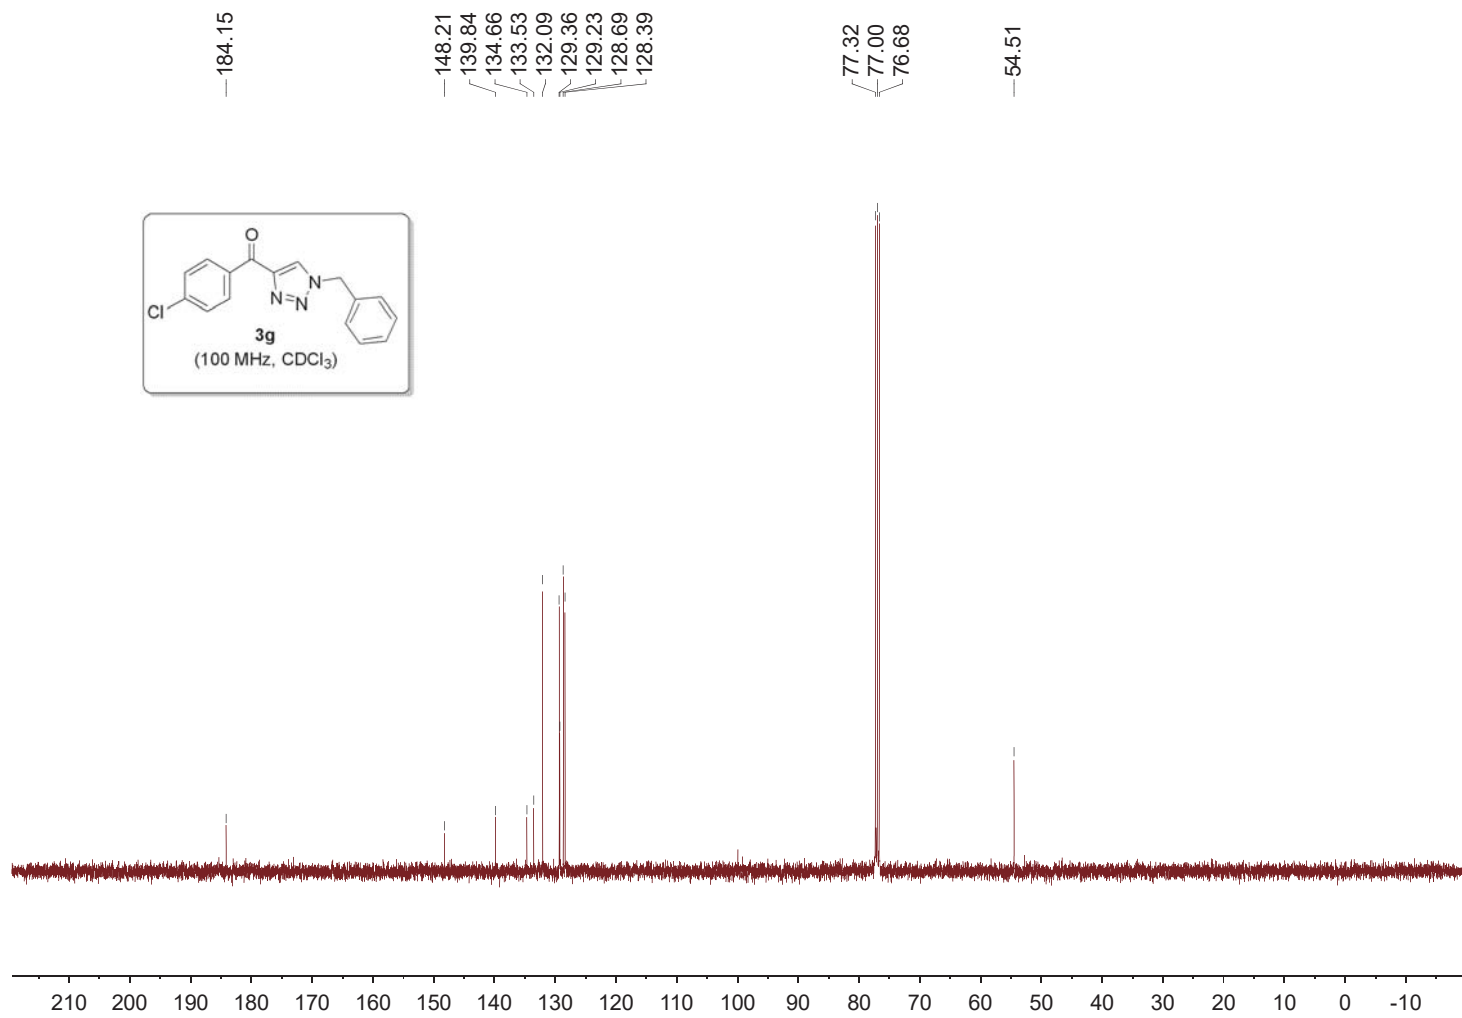

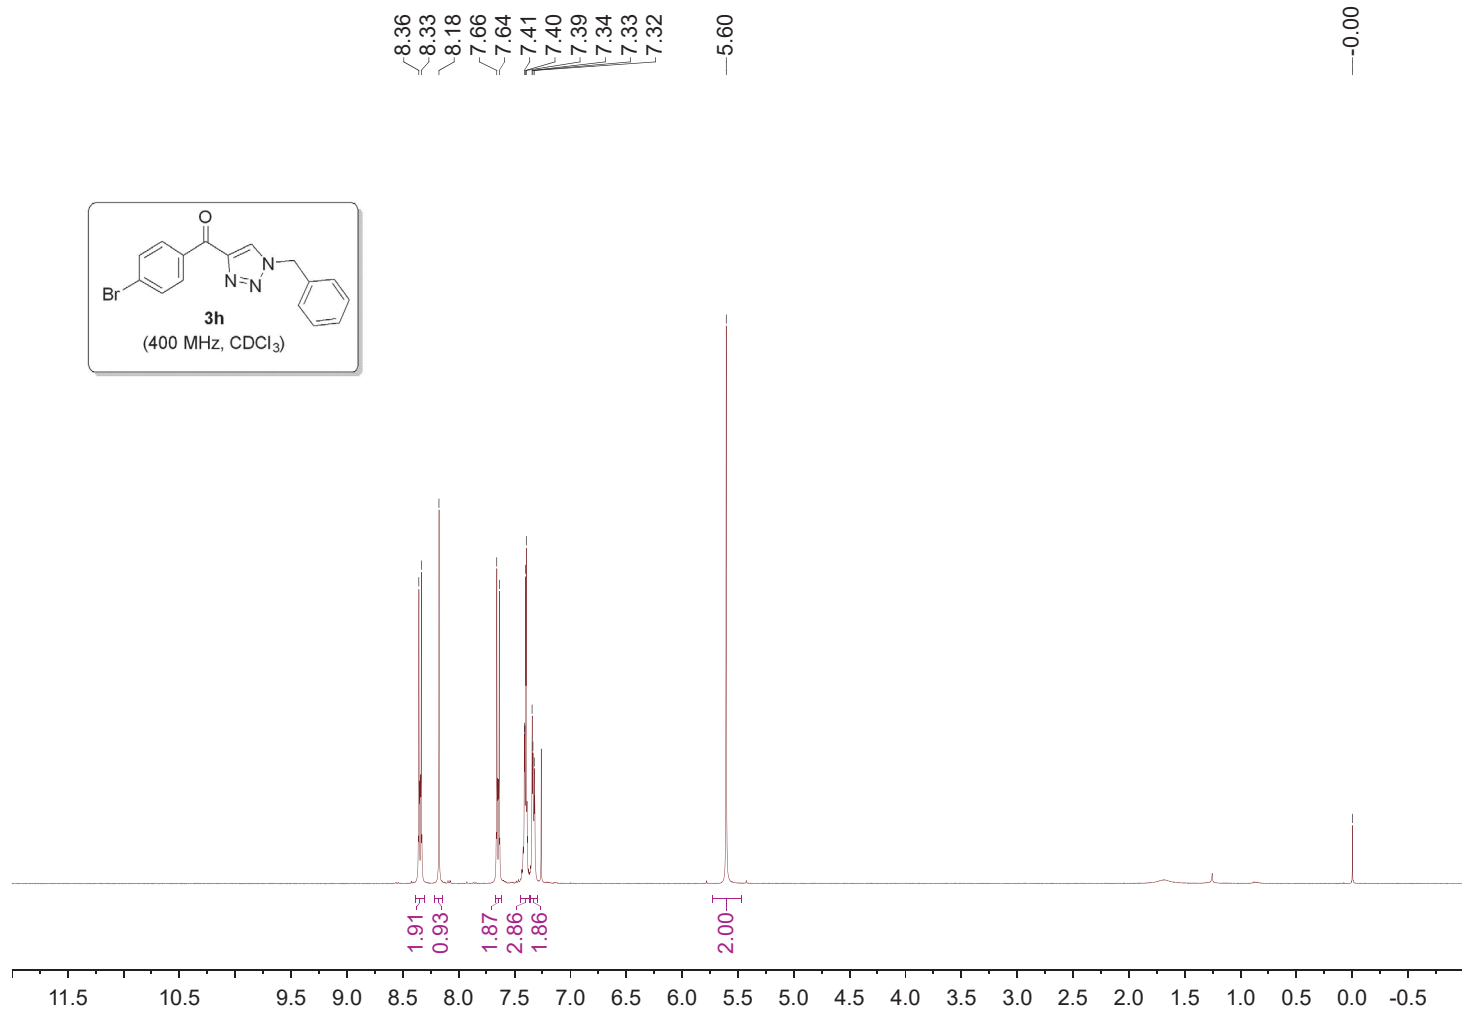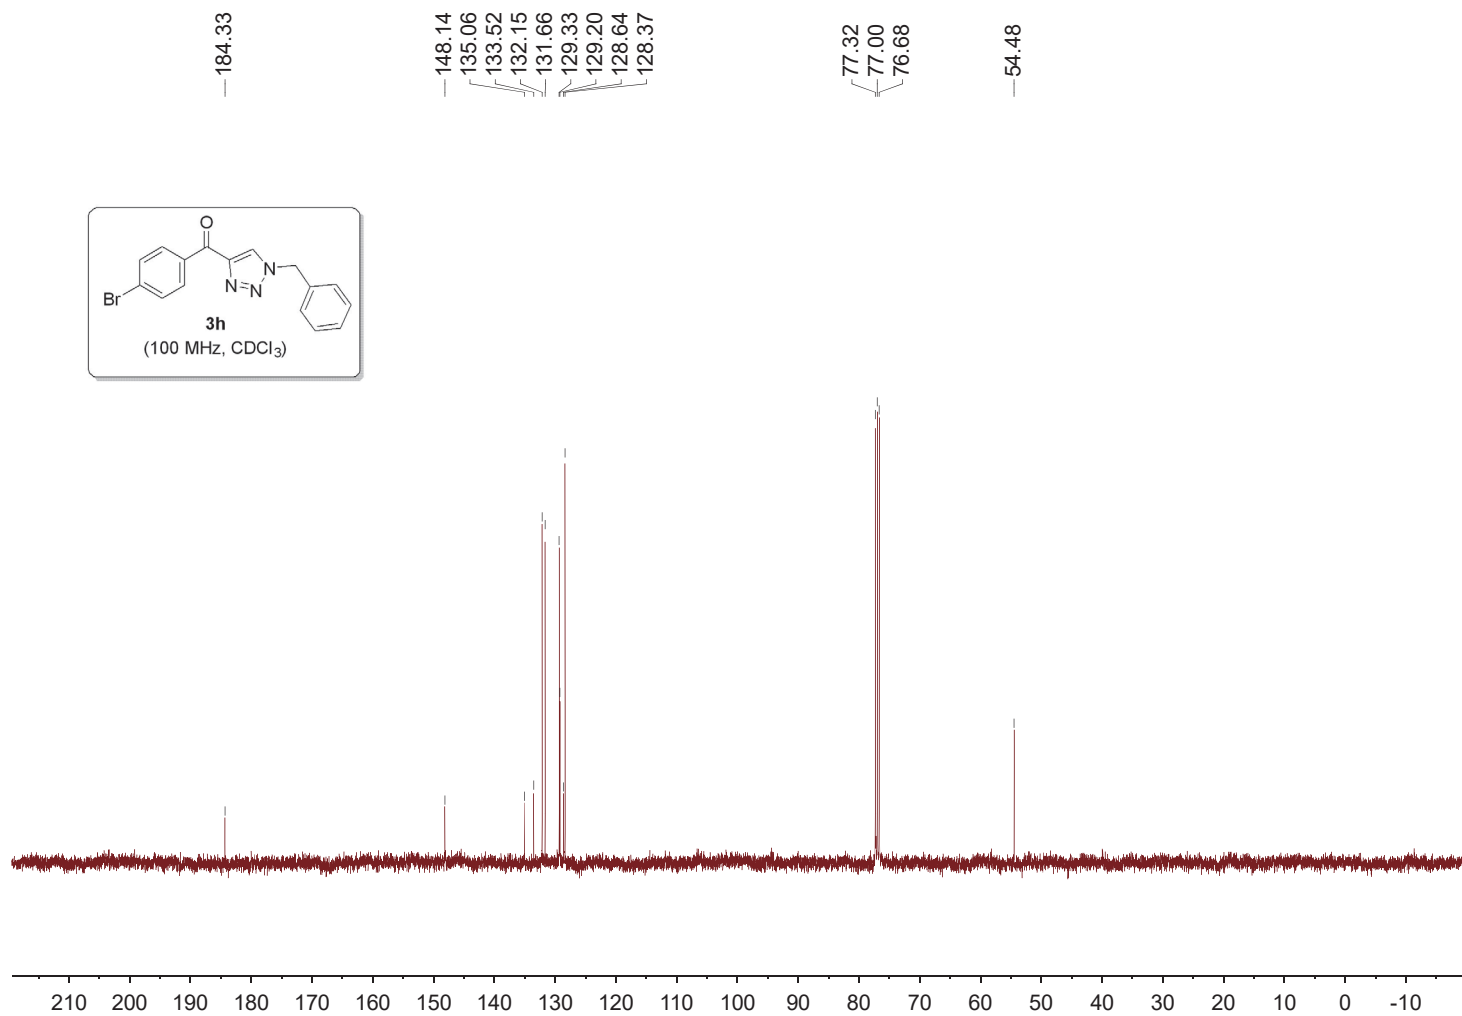

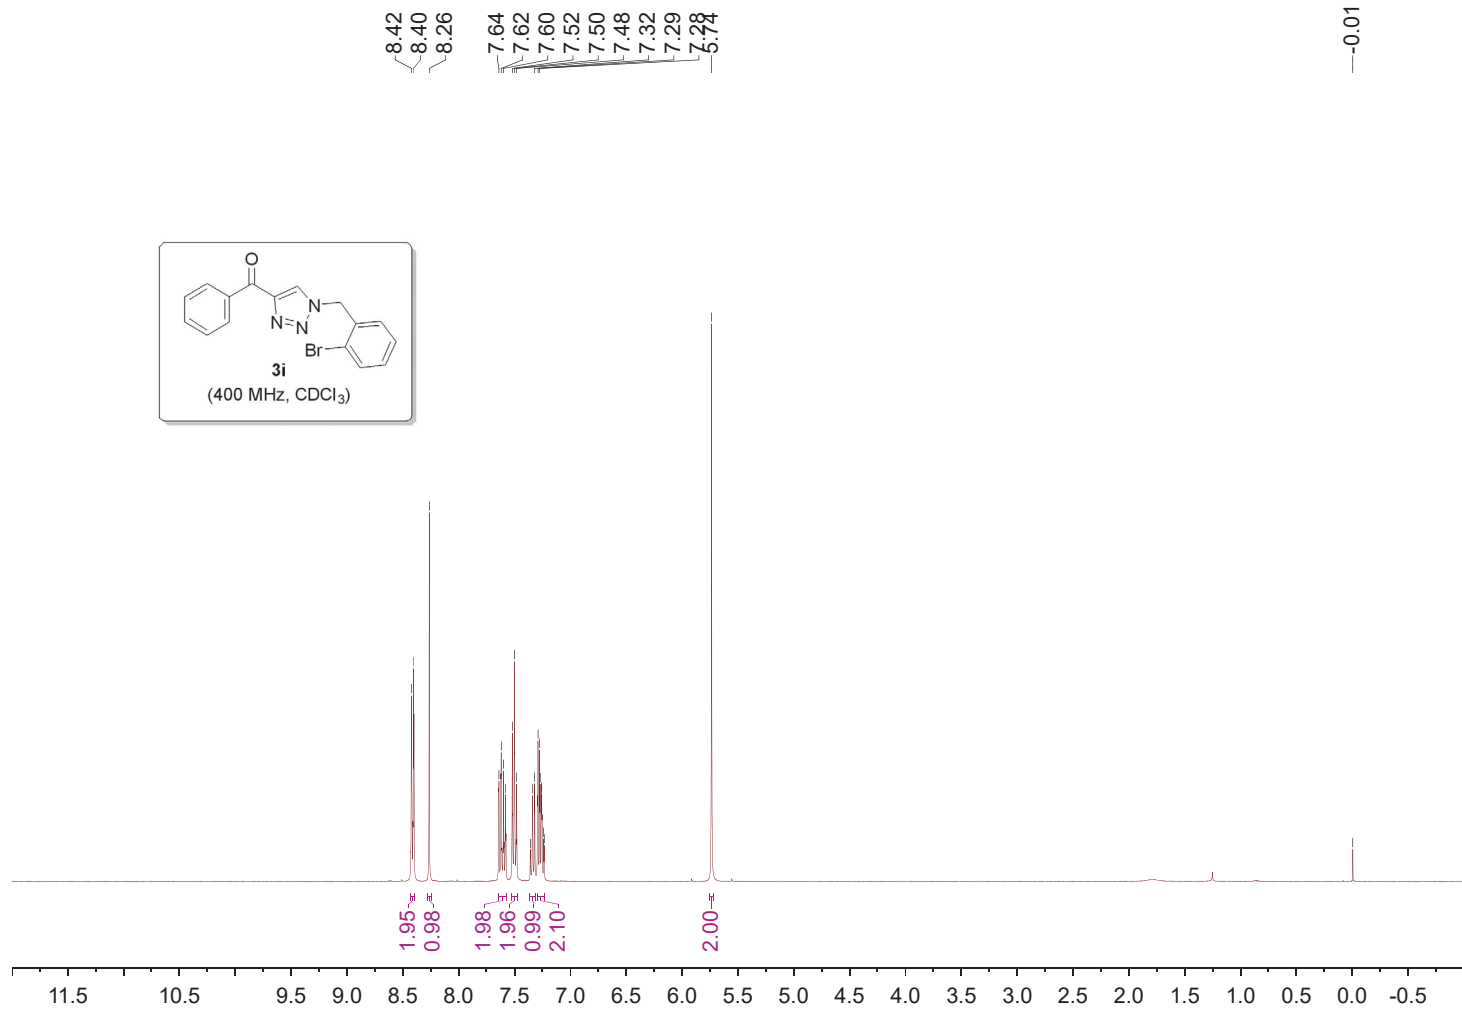

--0.01

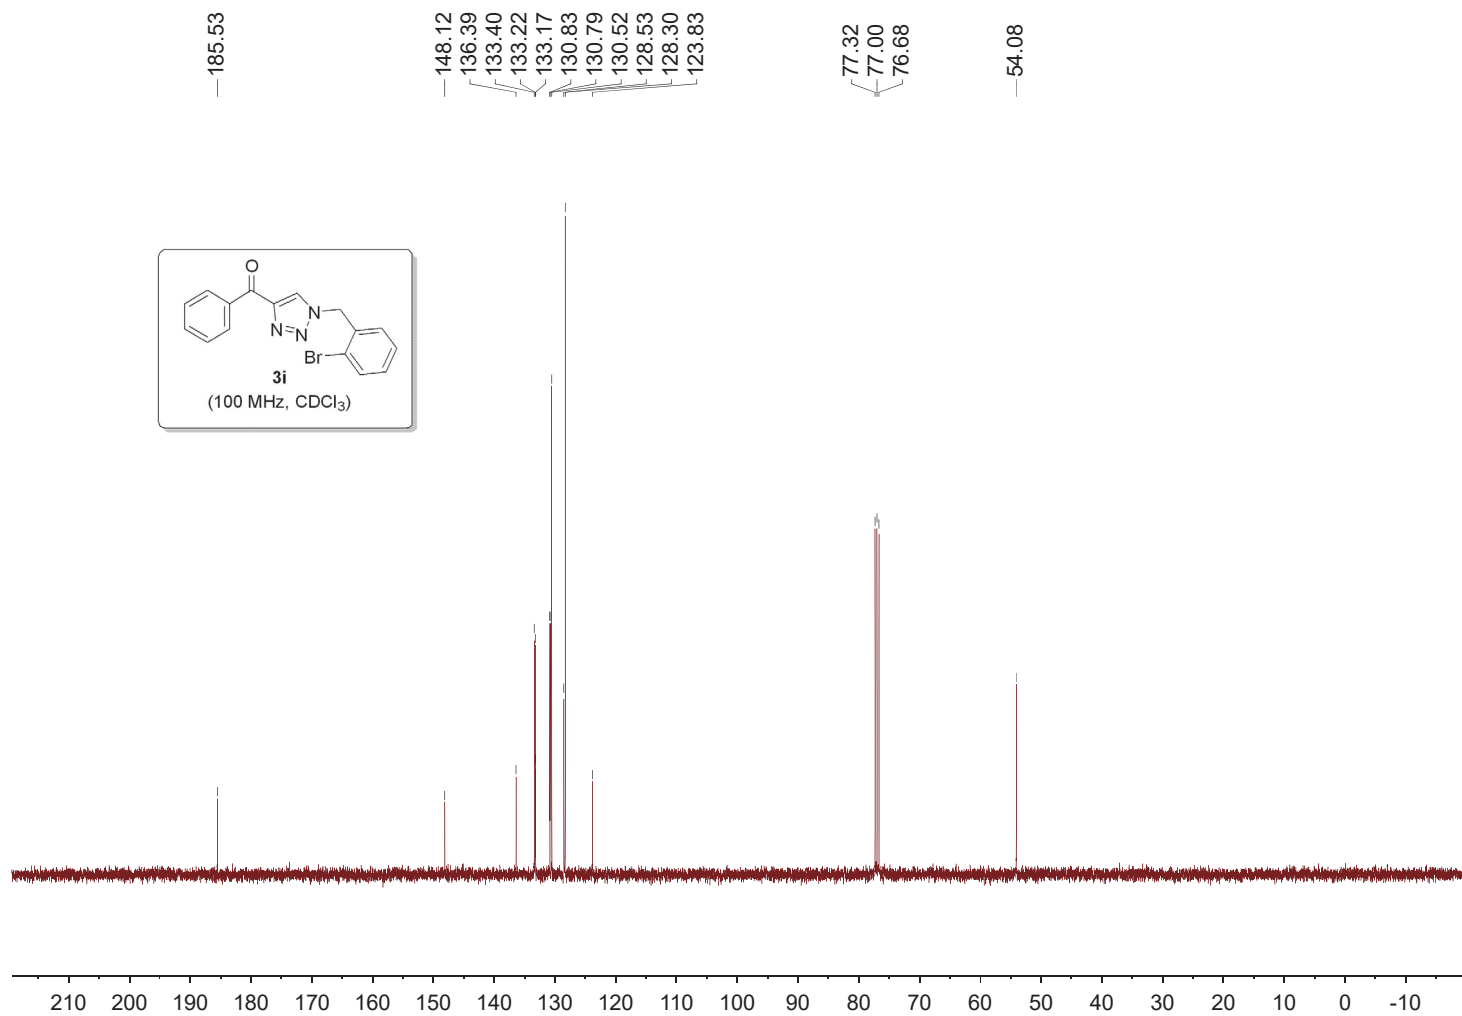

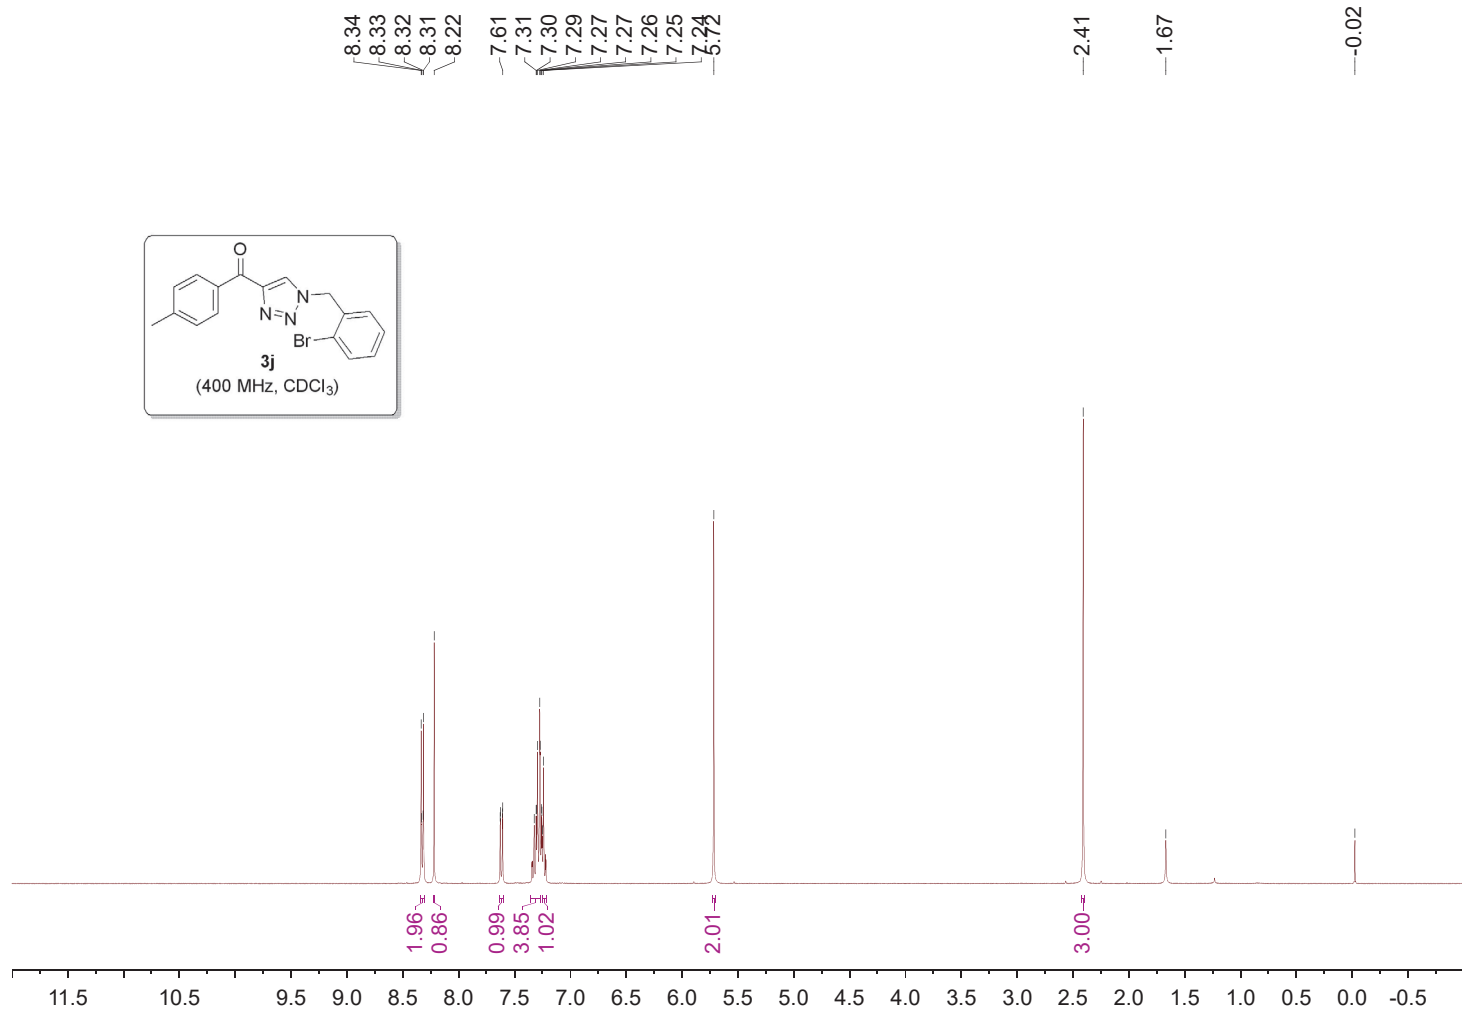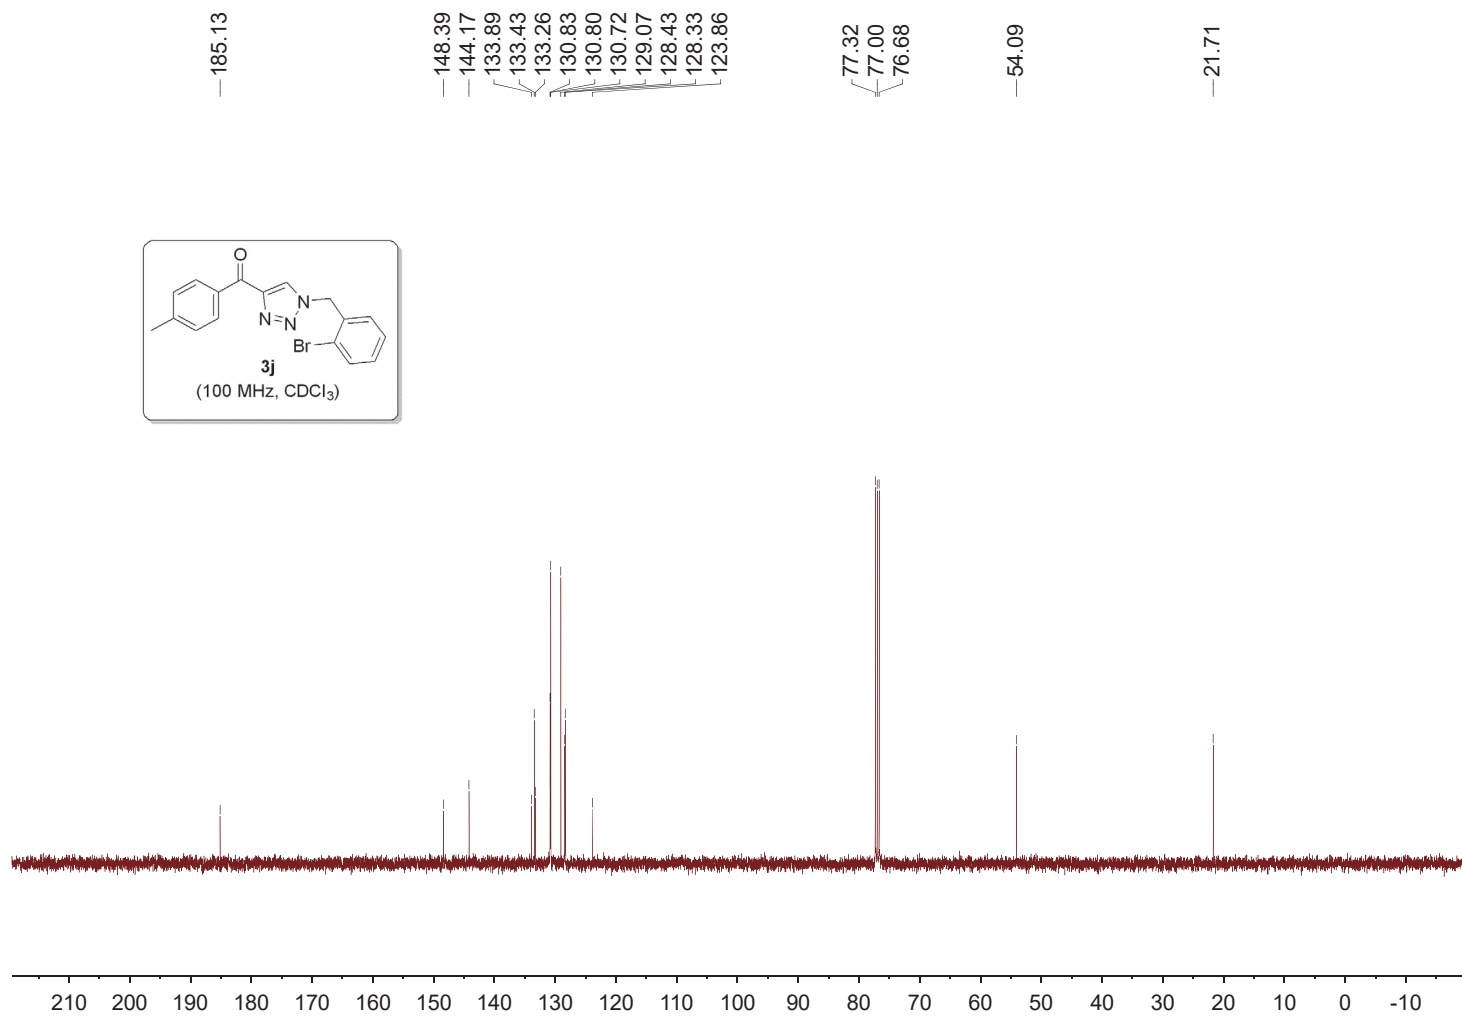

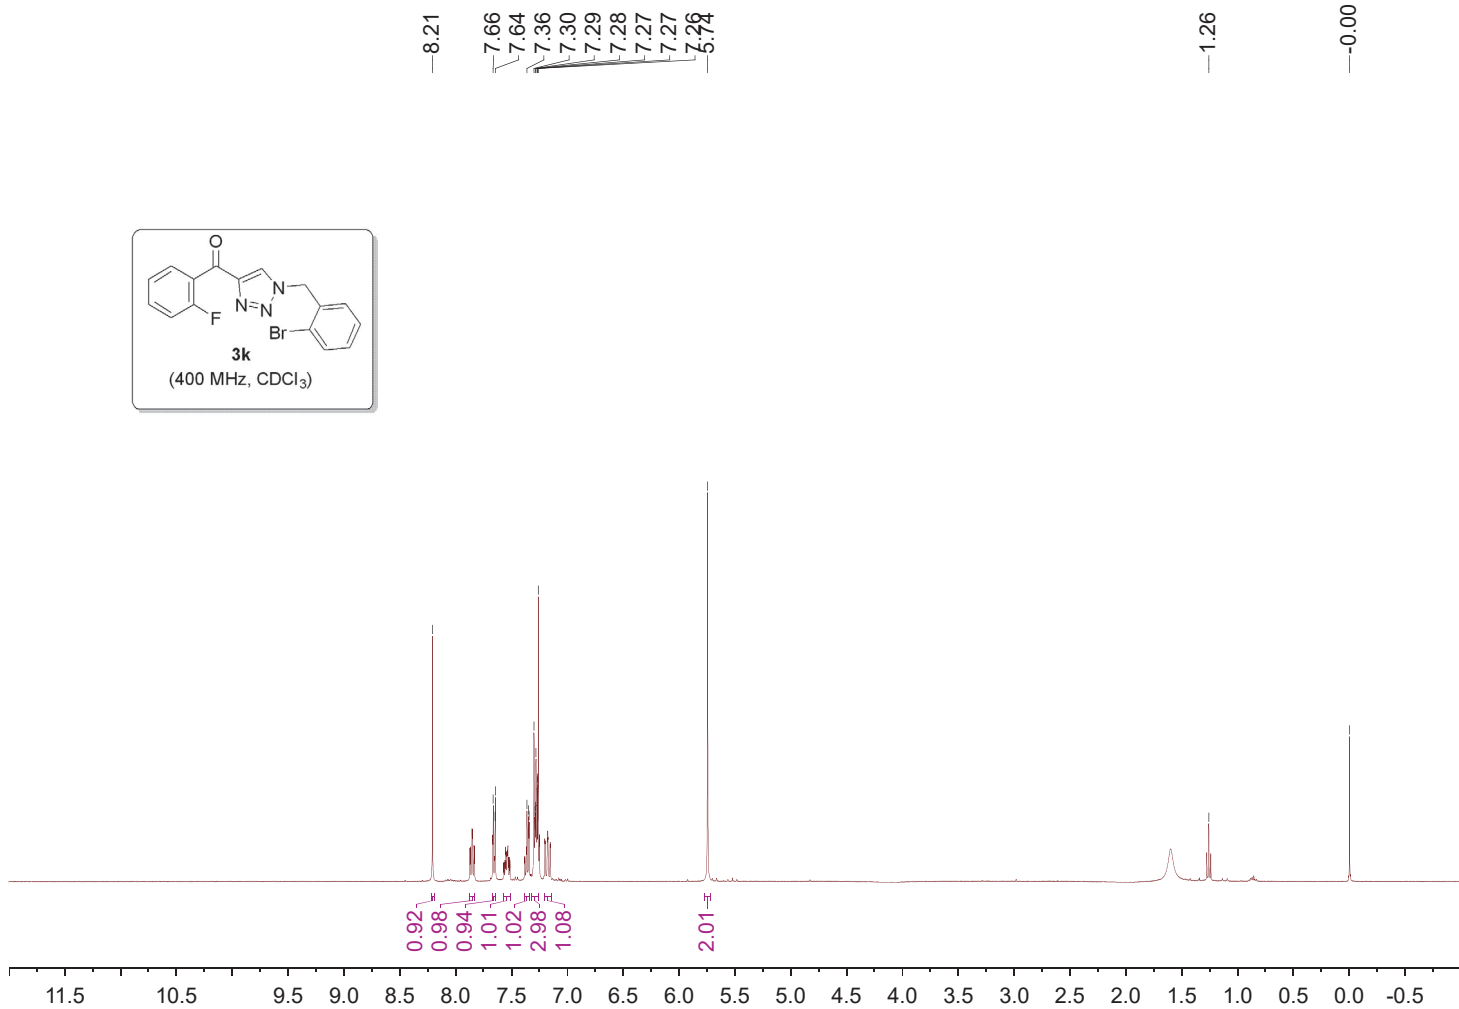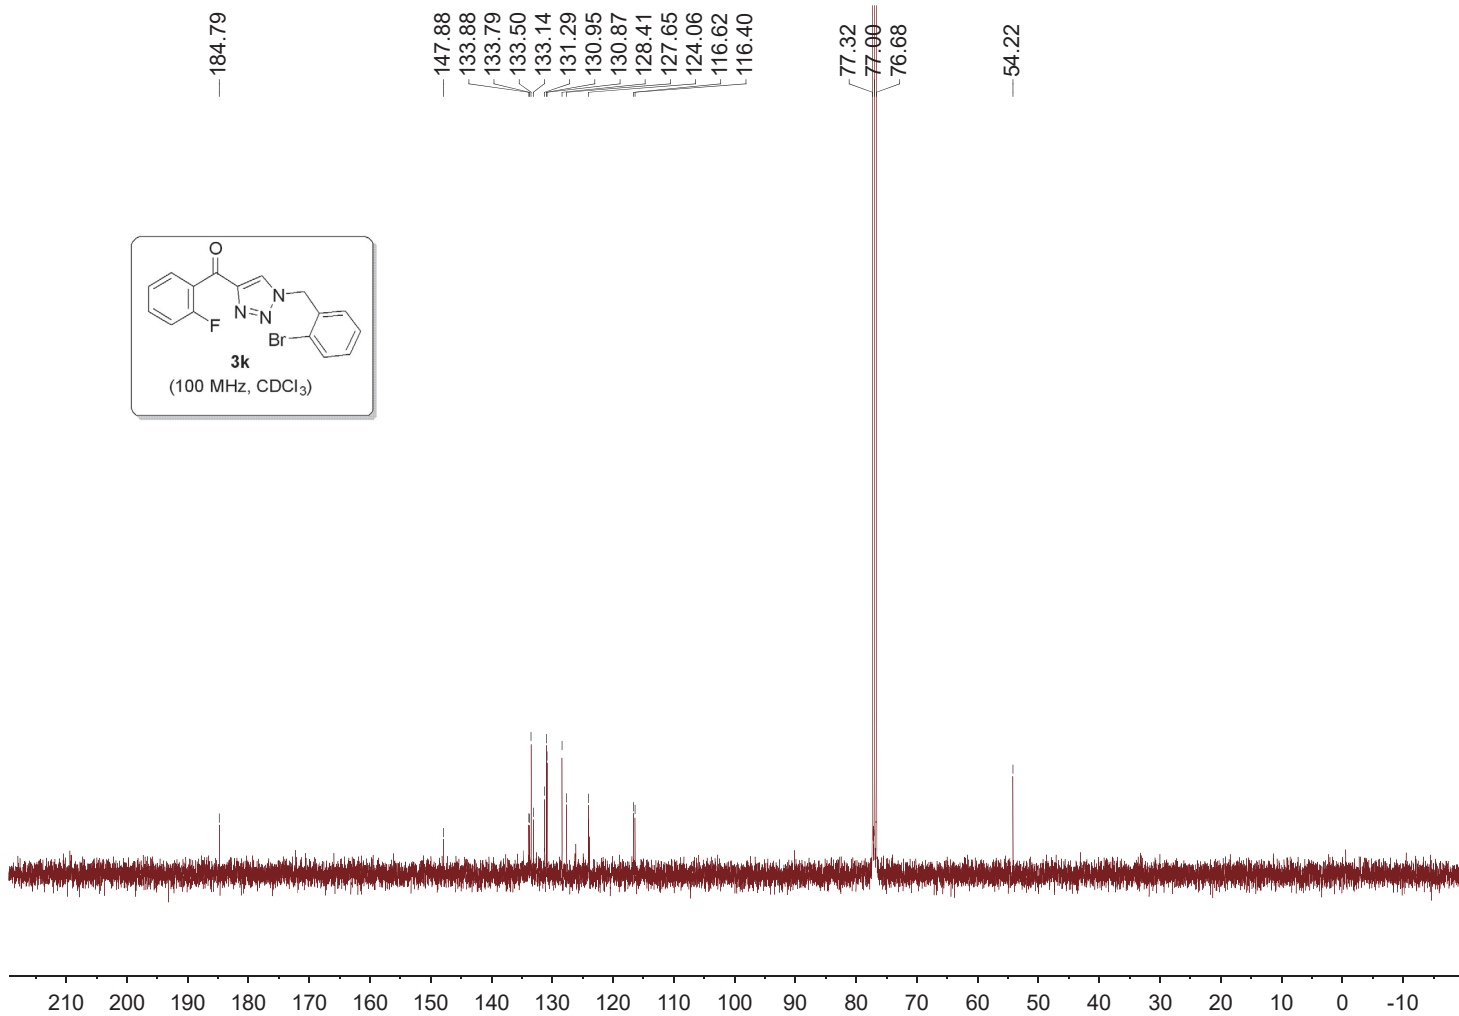

8.35  
8.35  
8.34  
8.33  
8.27  
7.65  
7.64  
7.63  
7.62  
7.62  
7.33  
7.30  
7.28  
7.26  
5.73

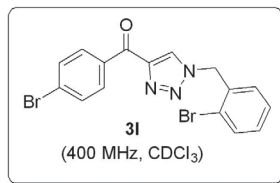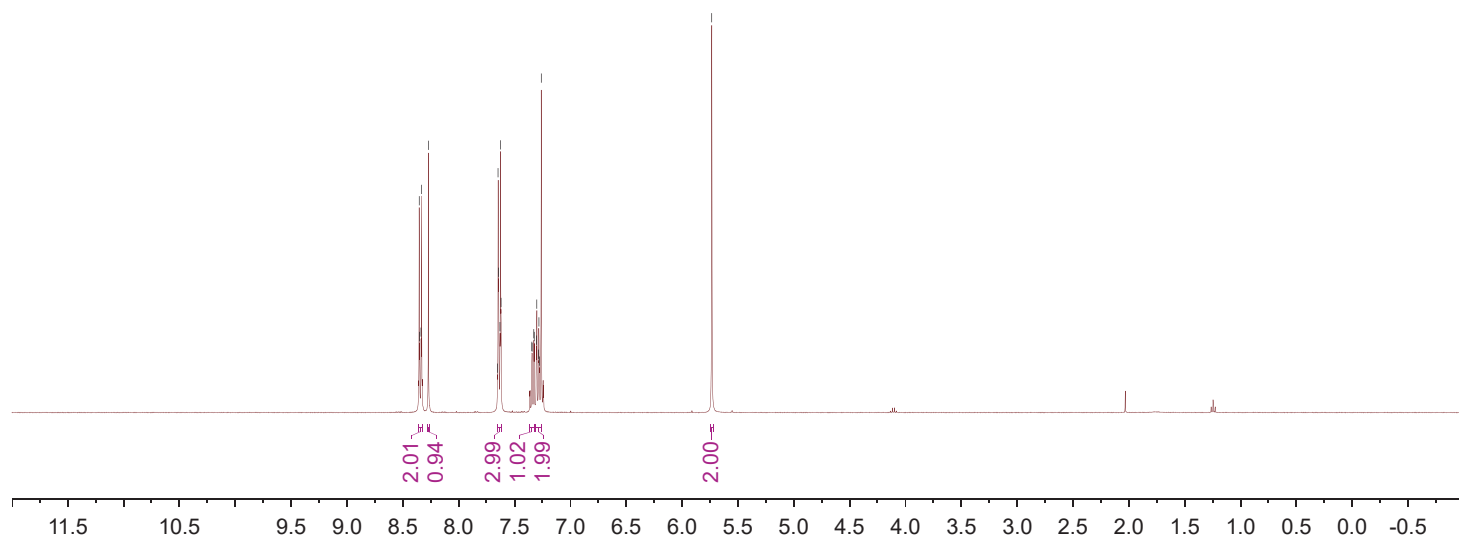

184.22  
147.94  
135.02  
133.44  
133.06  
132.13  
131.62  
130.90  
130.86  
128.67  
128.62  
128.33  
123.89  
77.32  
77.00  
76.68  
54.15

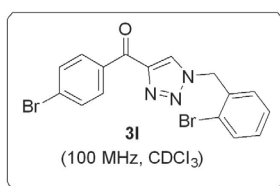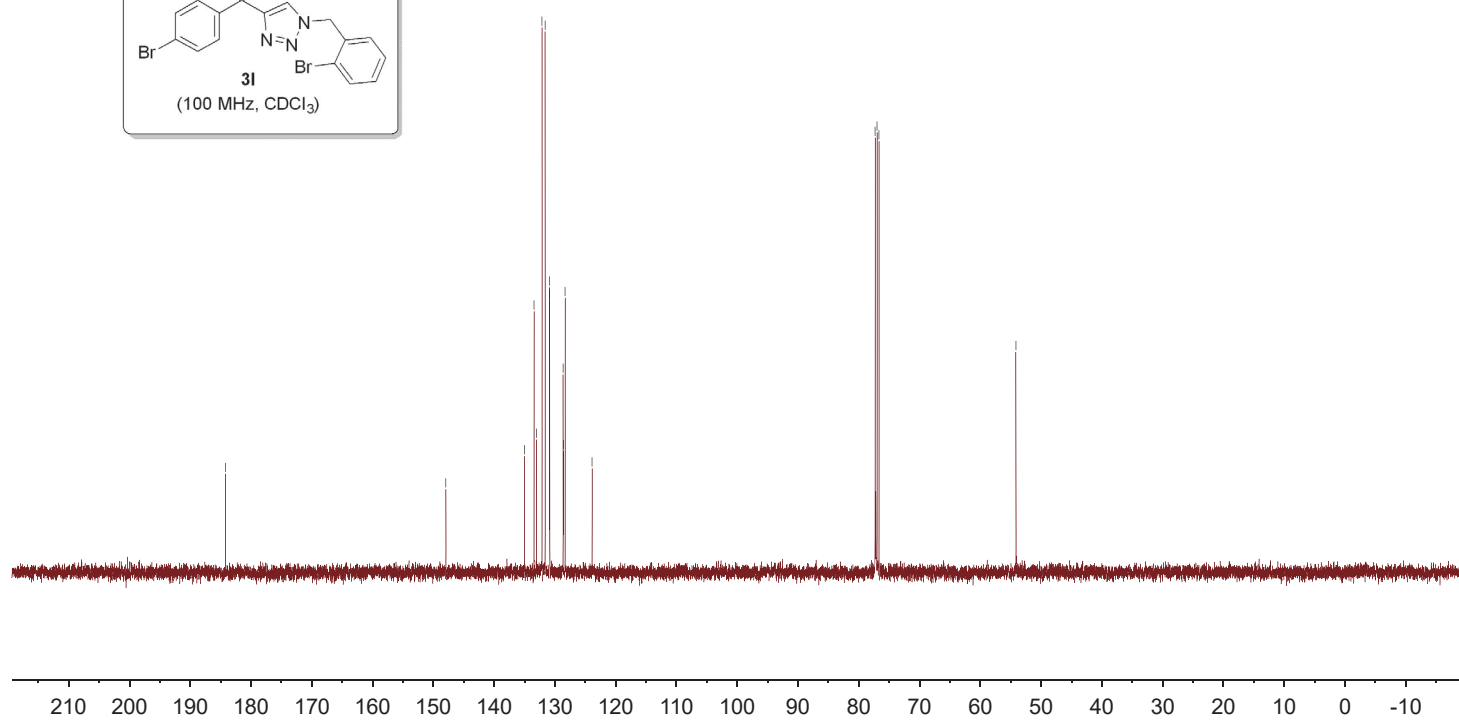

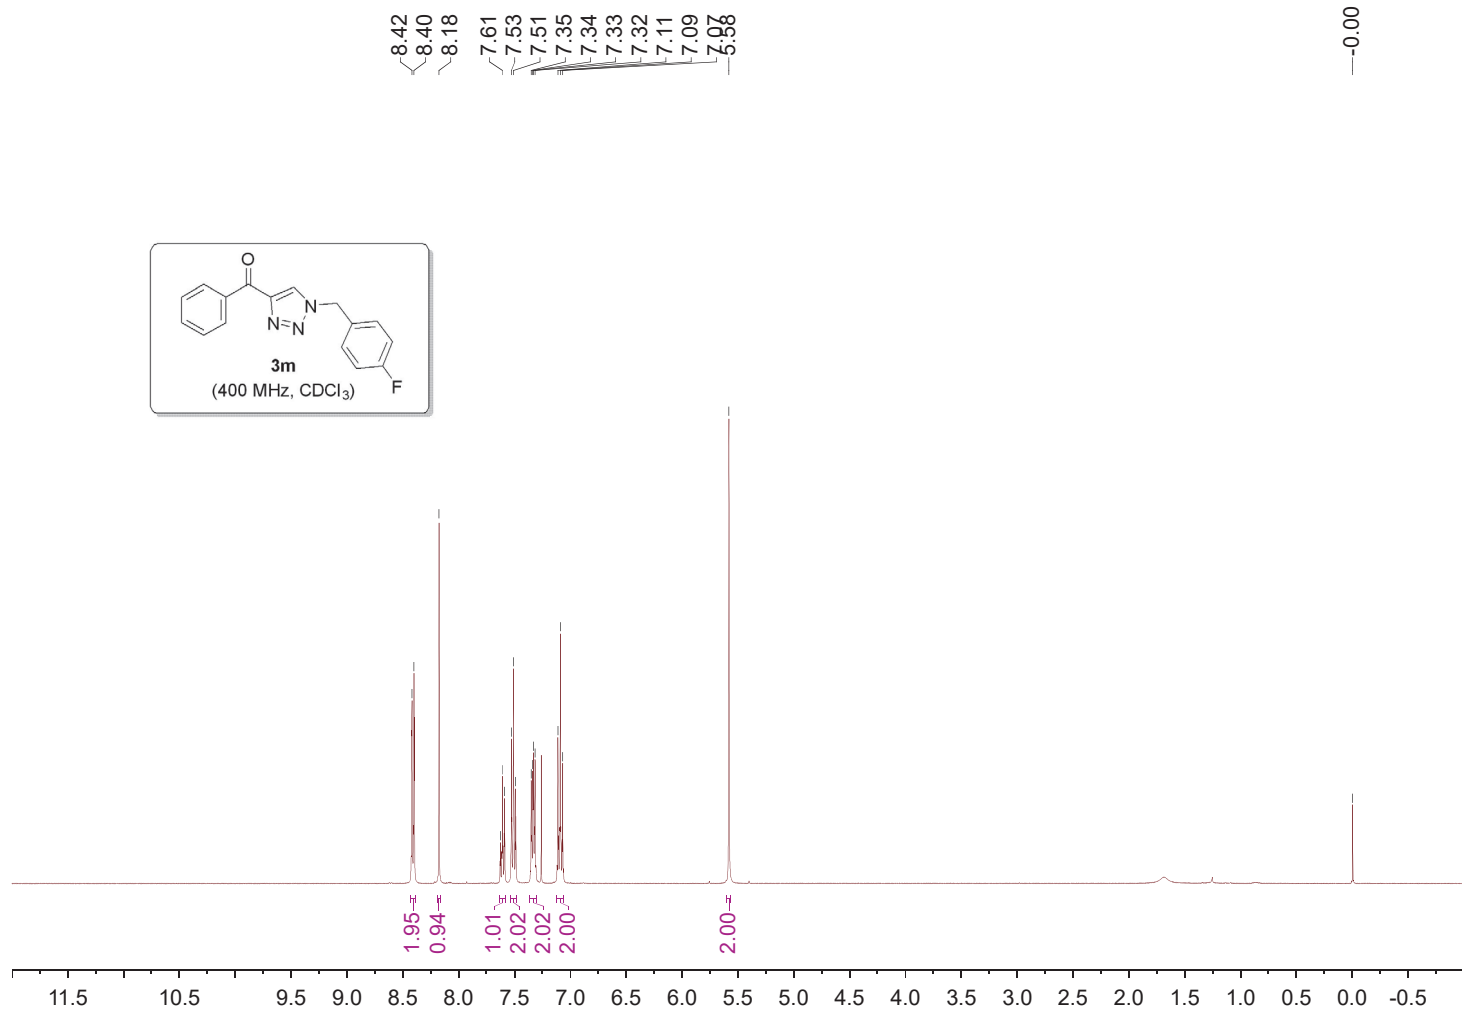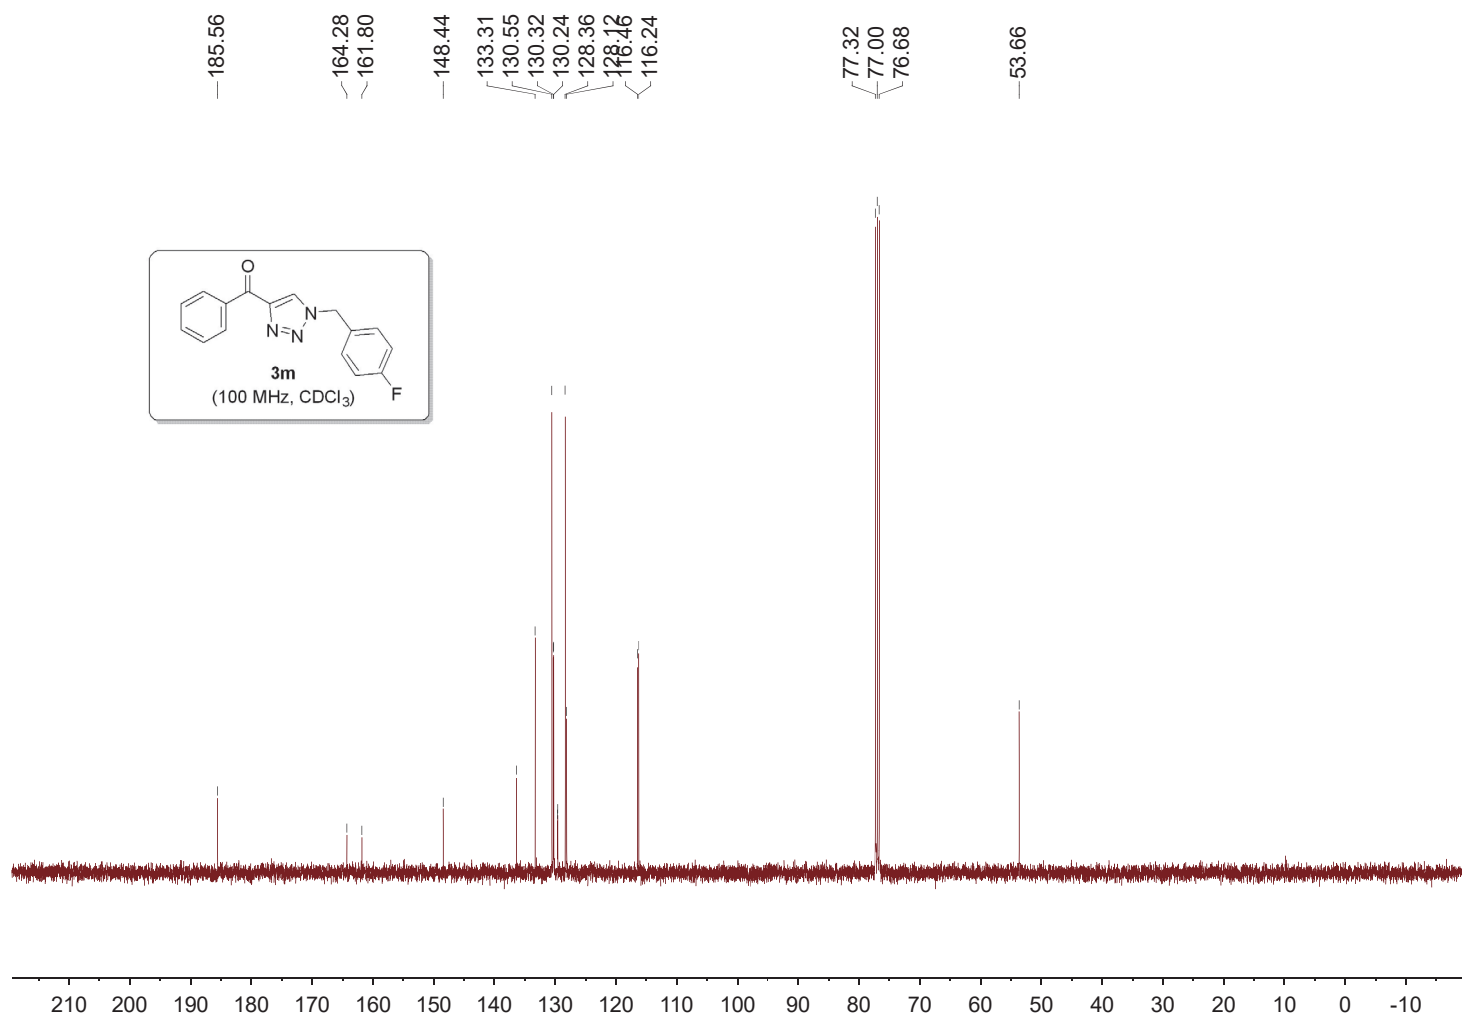

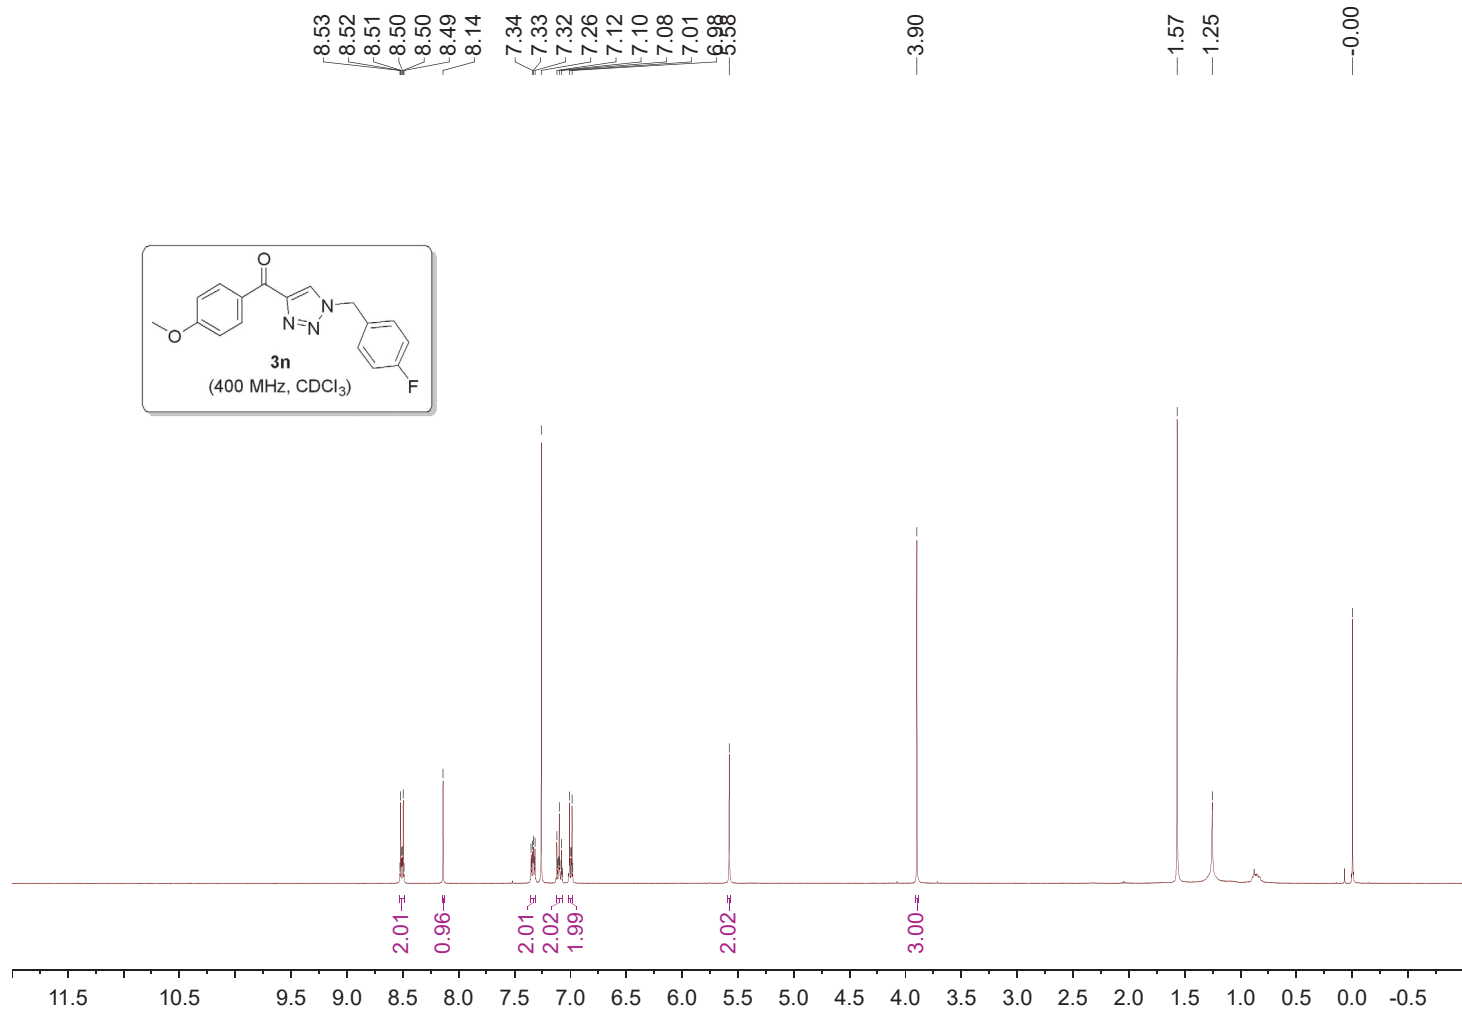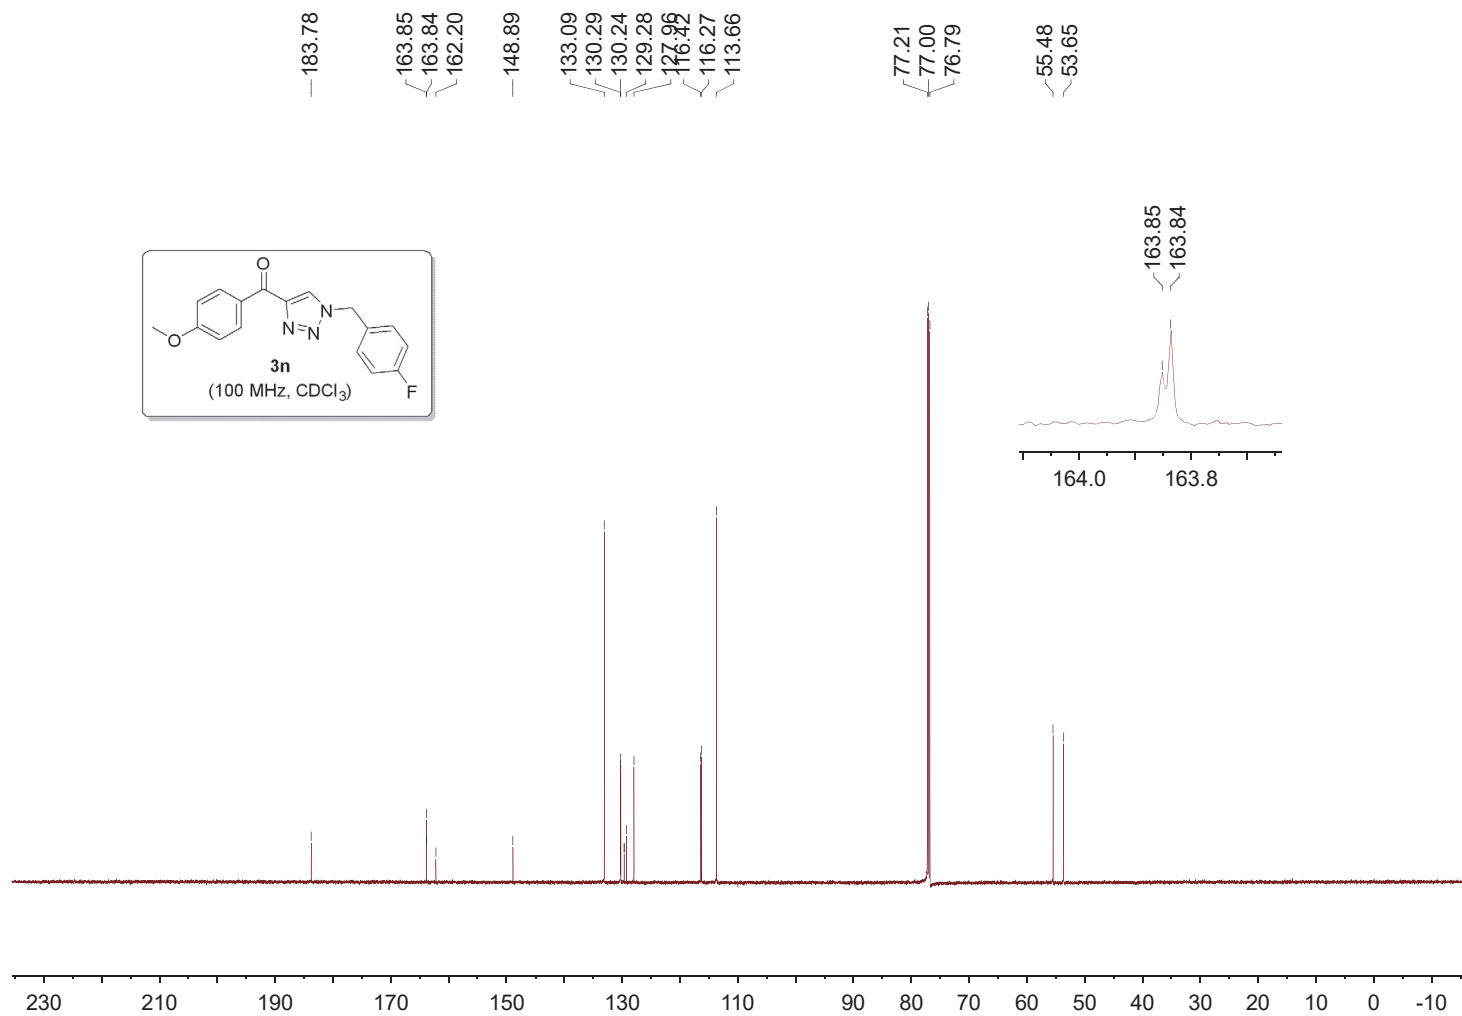



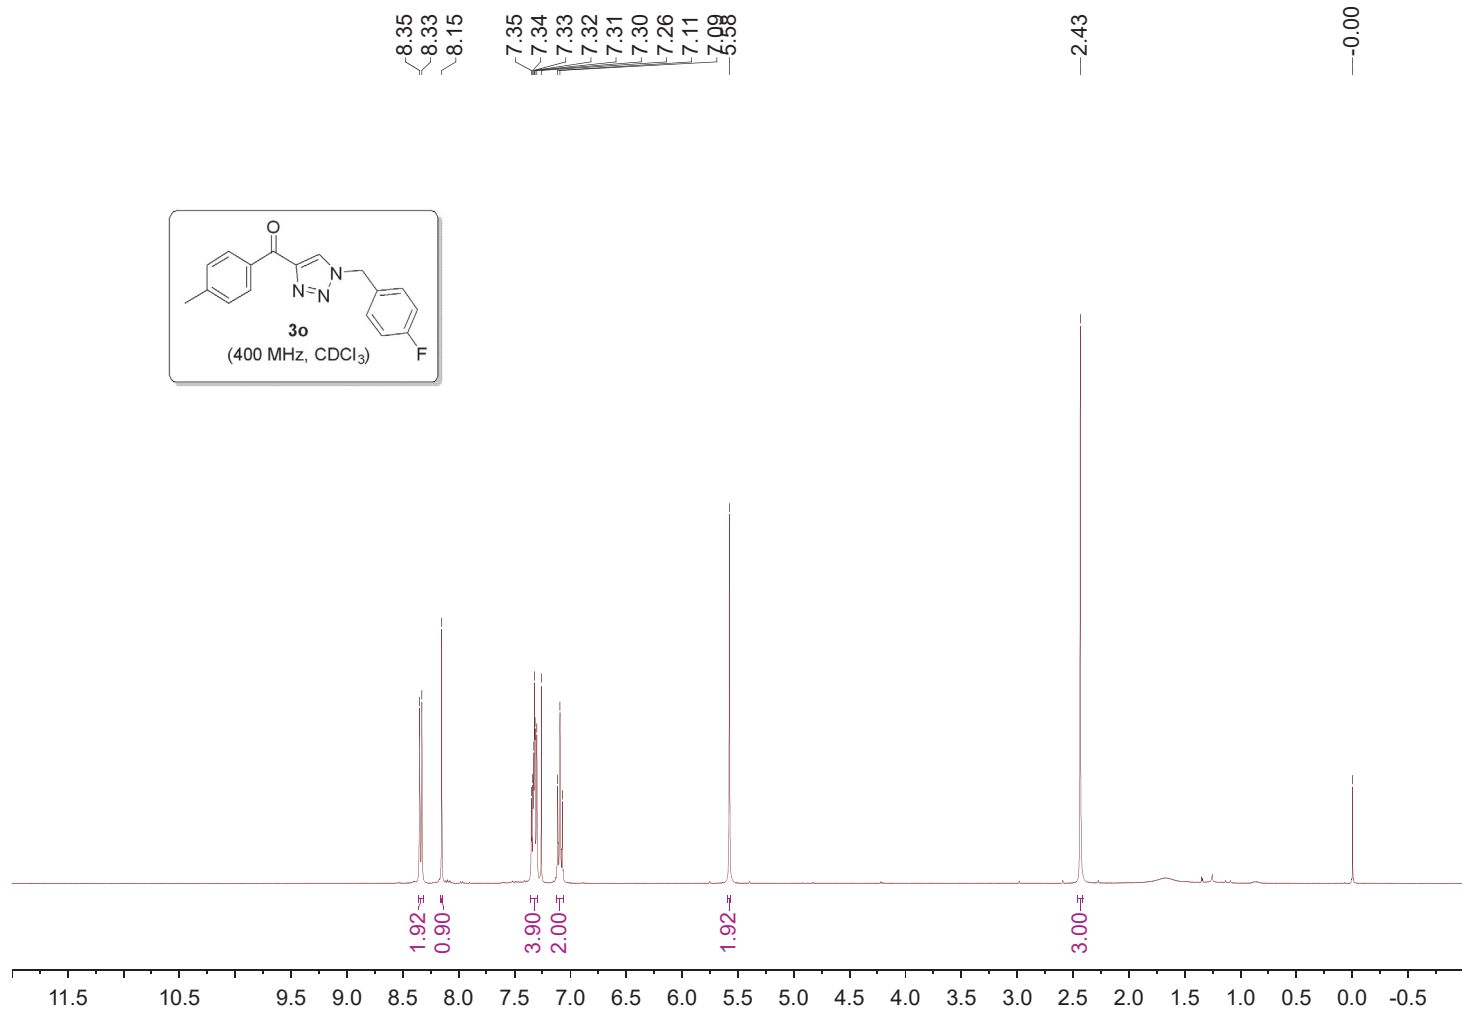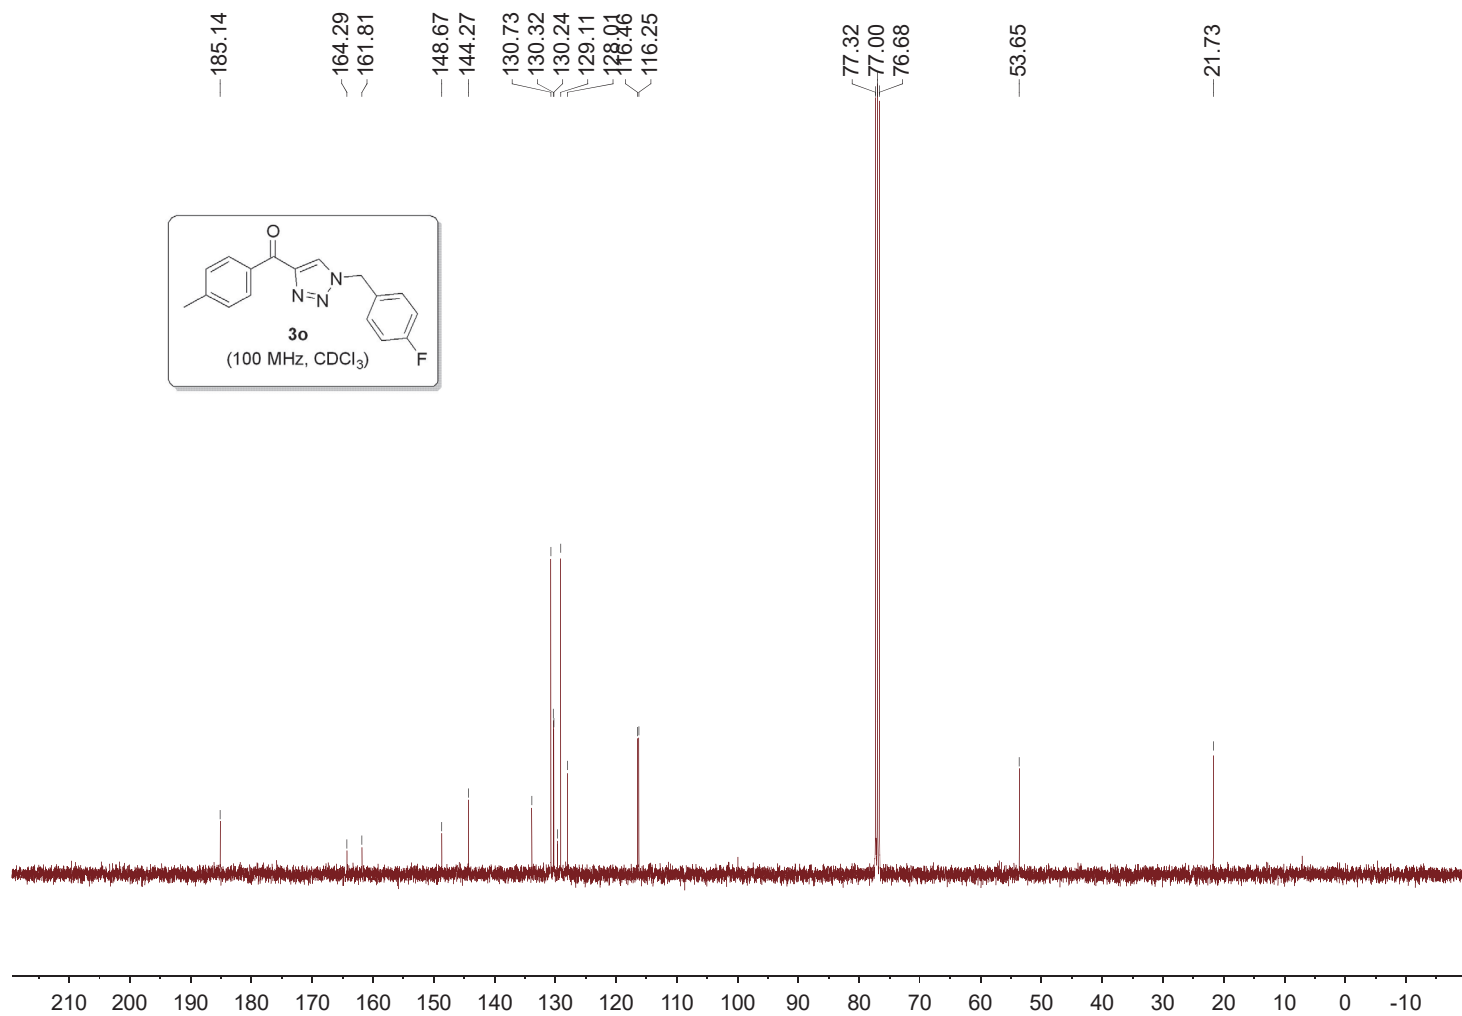

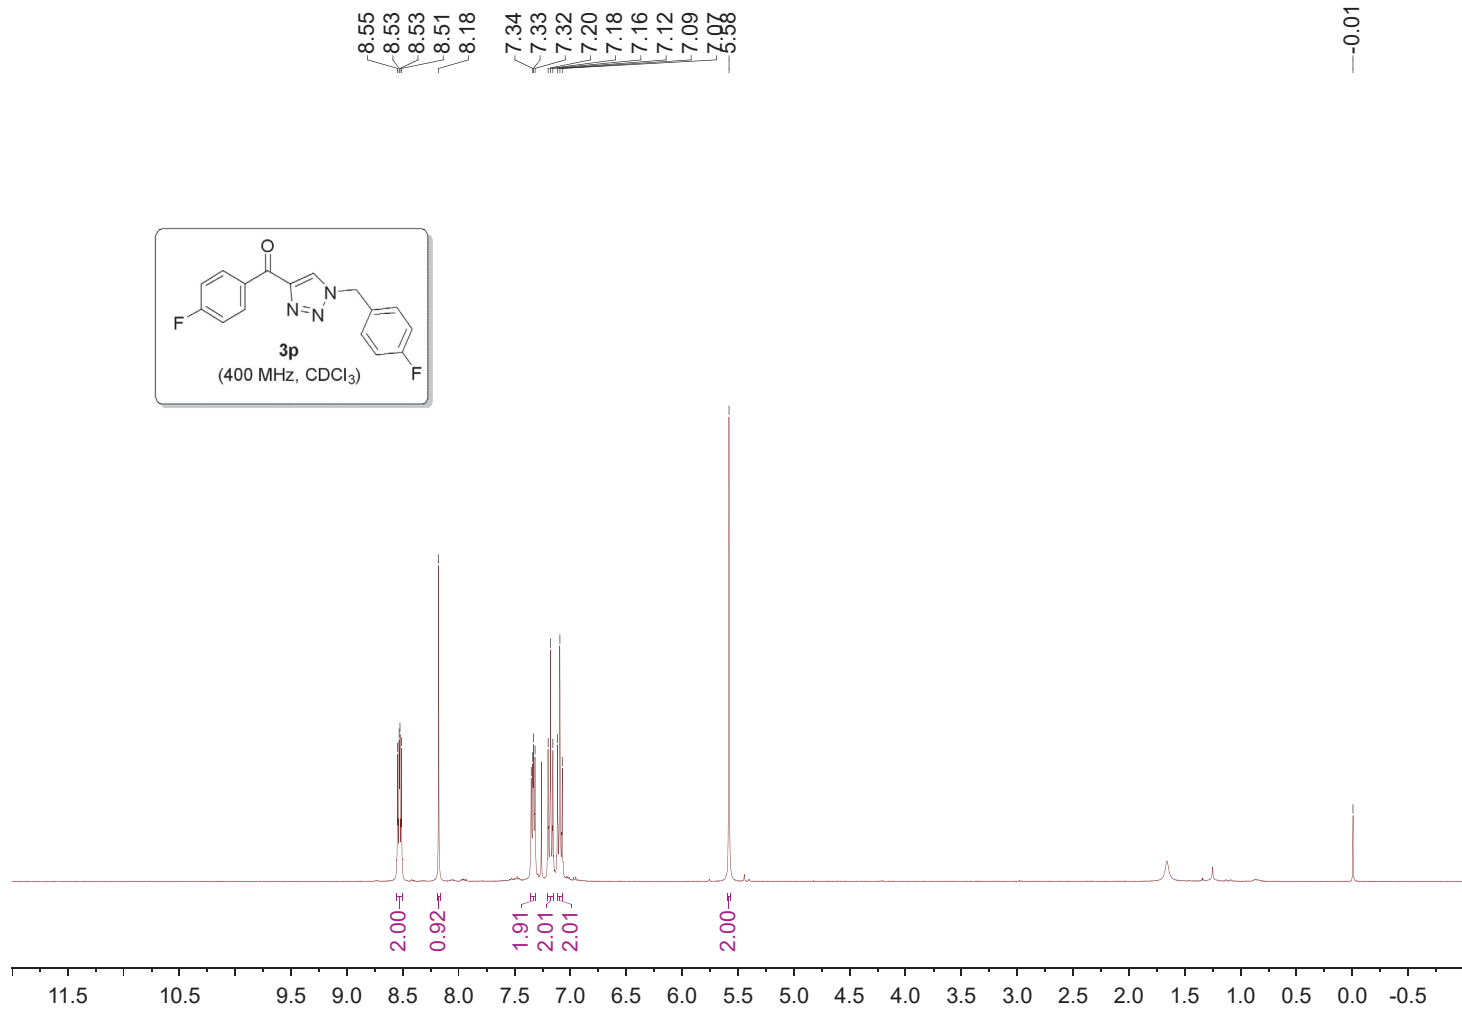

—0.01

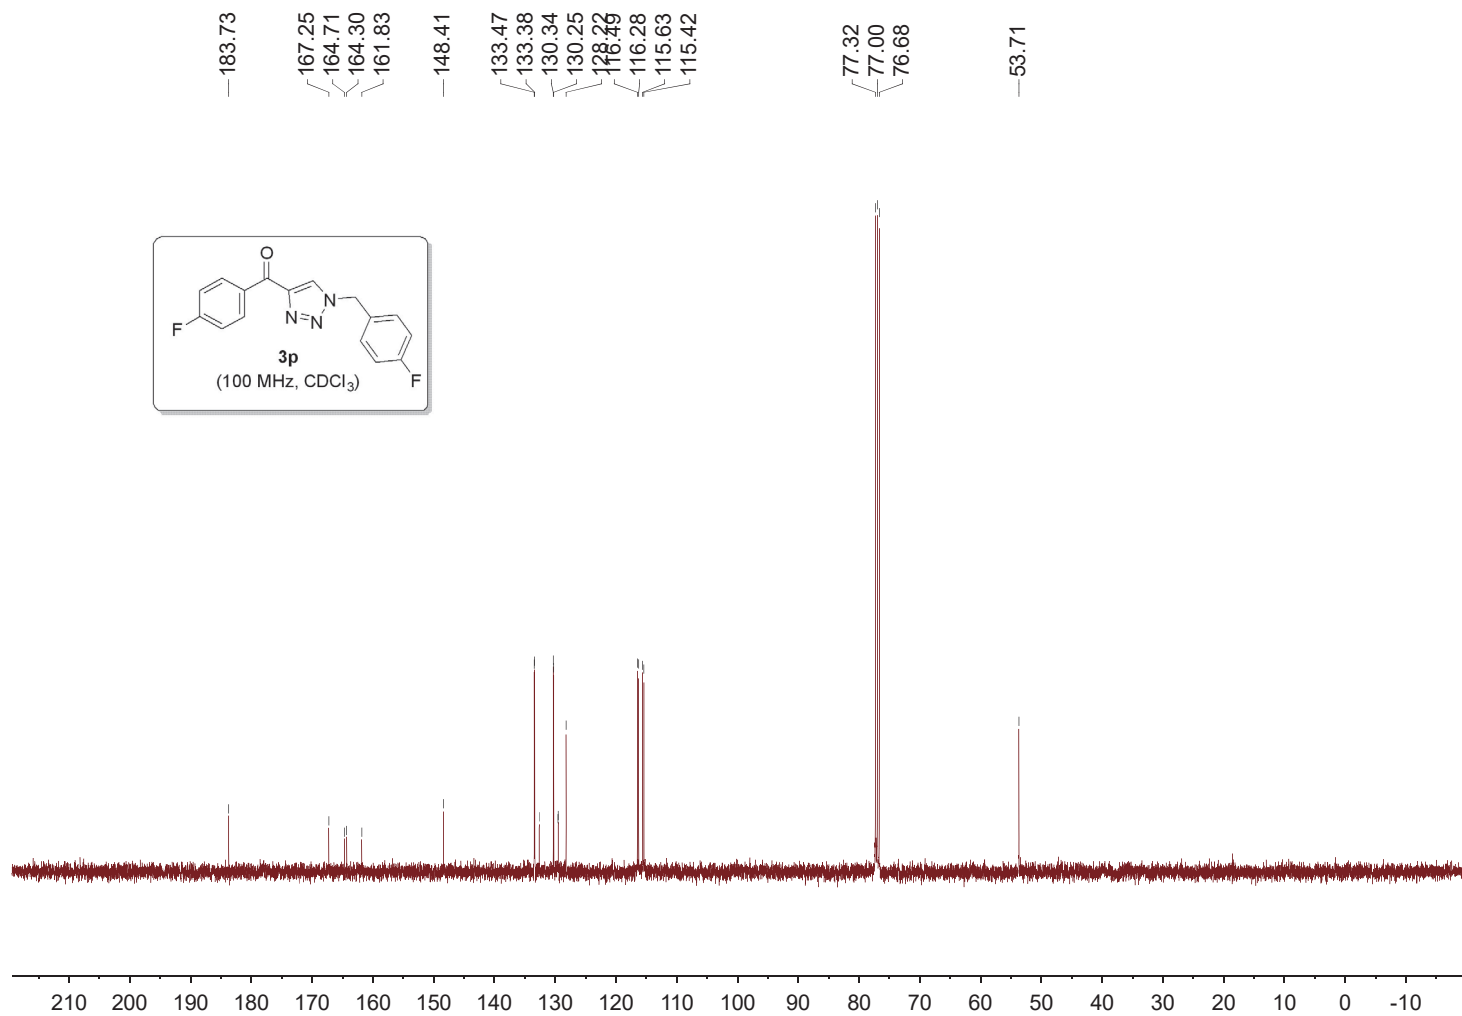

8.40  
8.39  
8.37  
8.35  
8.19  
7.47  
7.45  
7.35  
7.34  
7.33  
7.32  
7.11  
7.09  
5.97

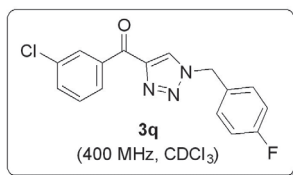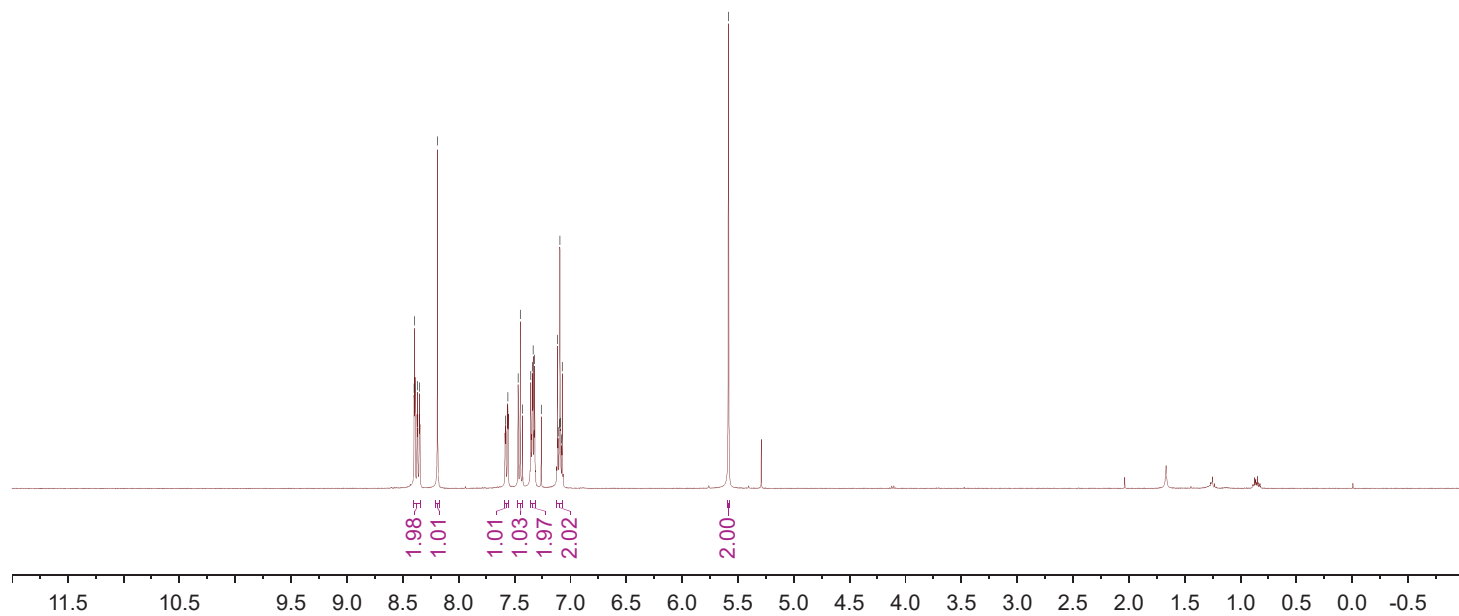

184.04  
164.30  
161.82  
148.04  
133.22  
130.43  
130.35  
130.27  
129.68  
118.50  
116.28  
77.32  
77.00  
76.68  
53.73

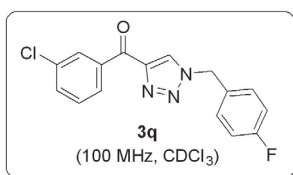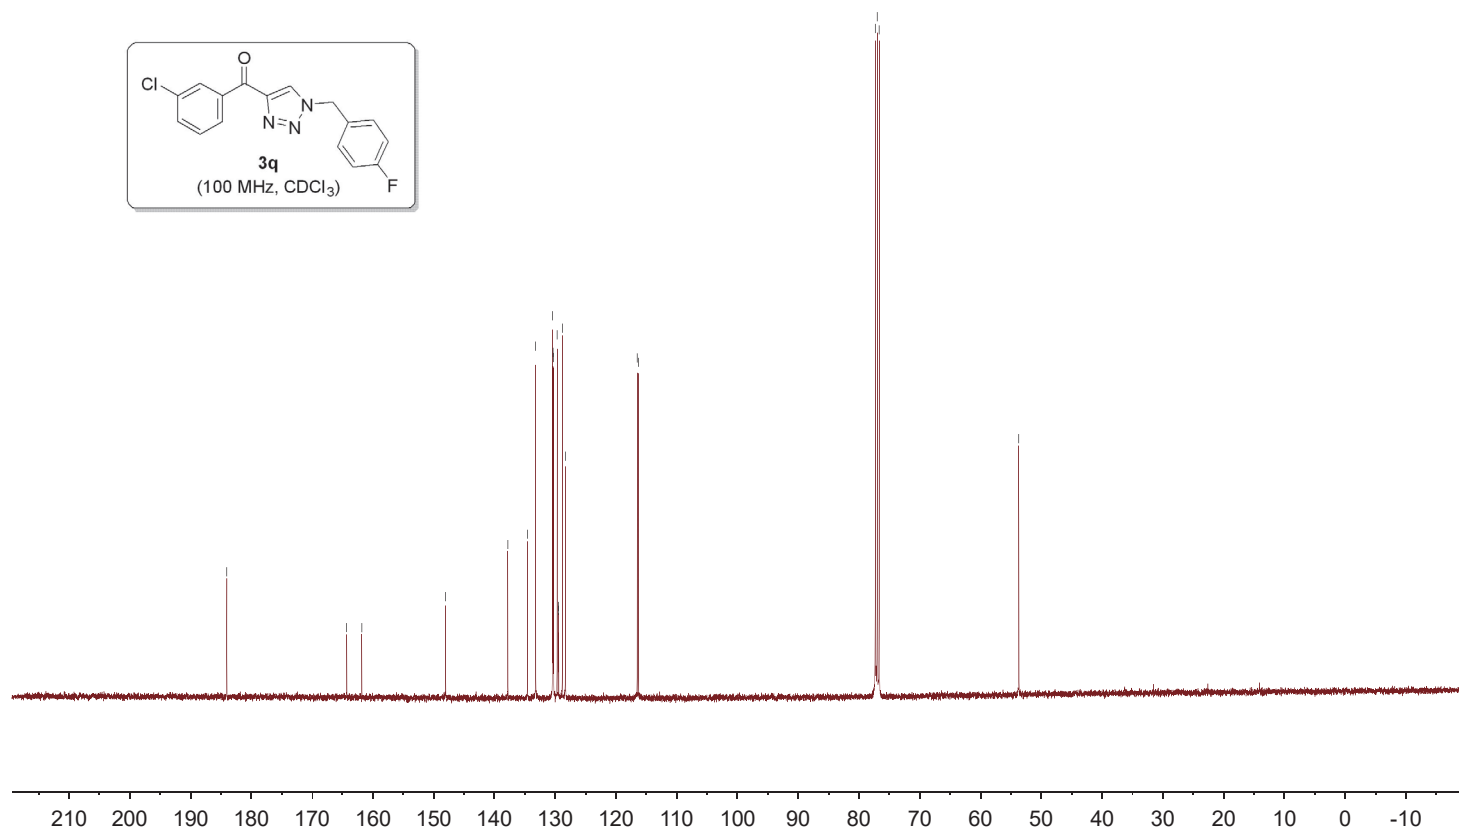

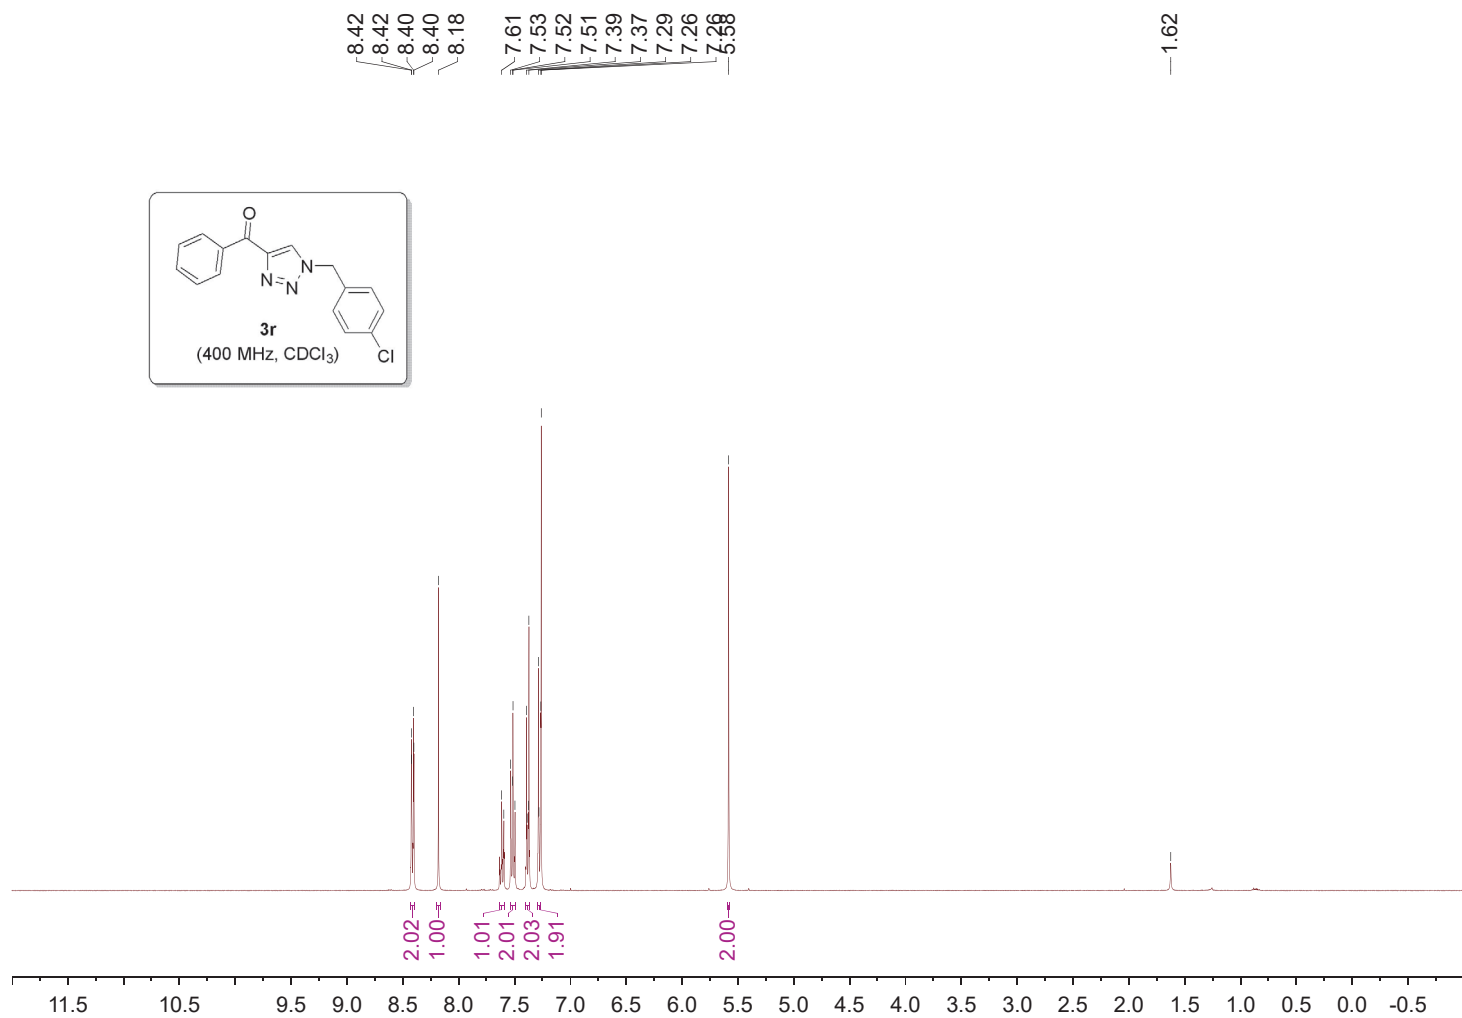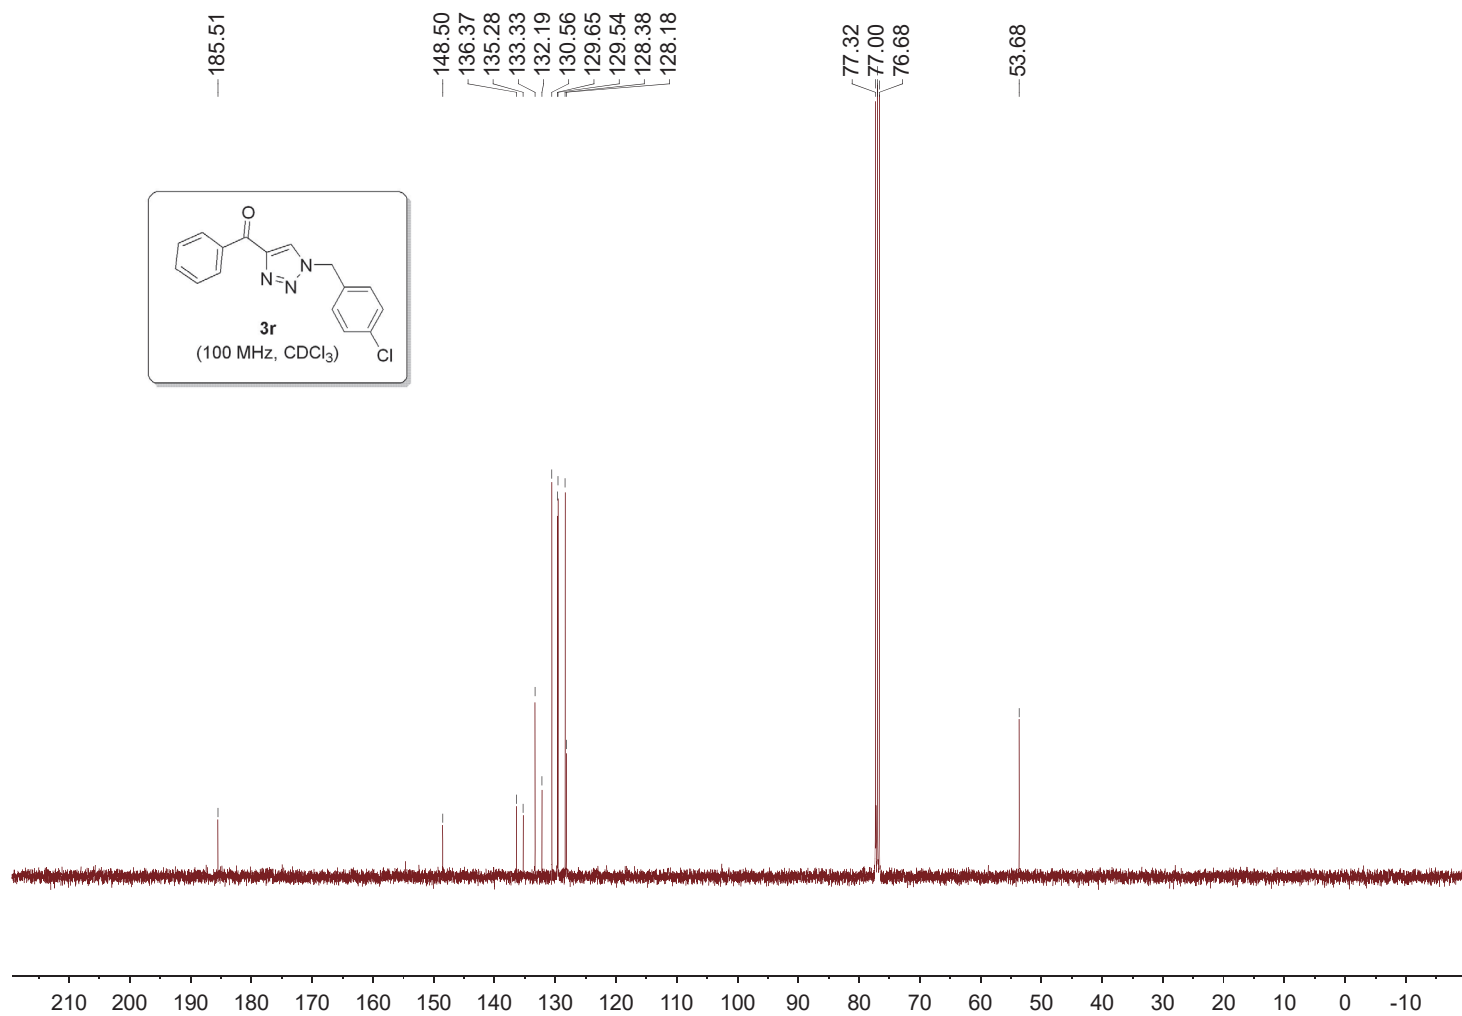

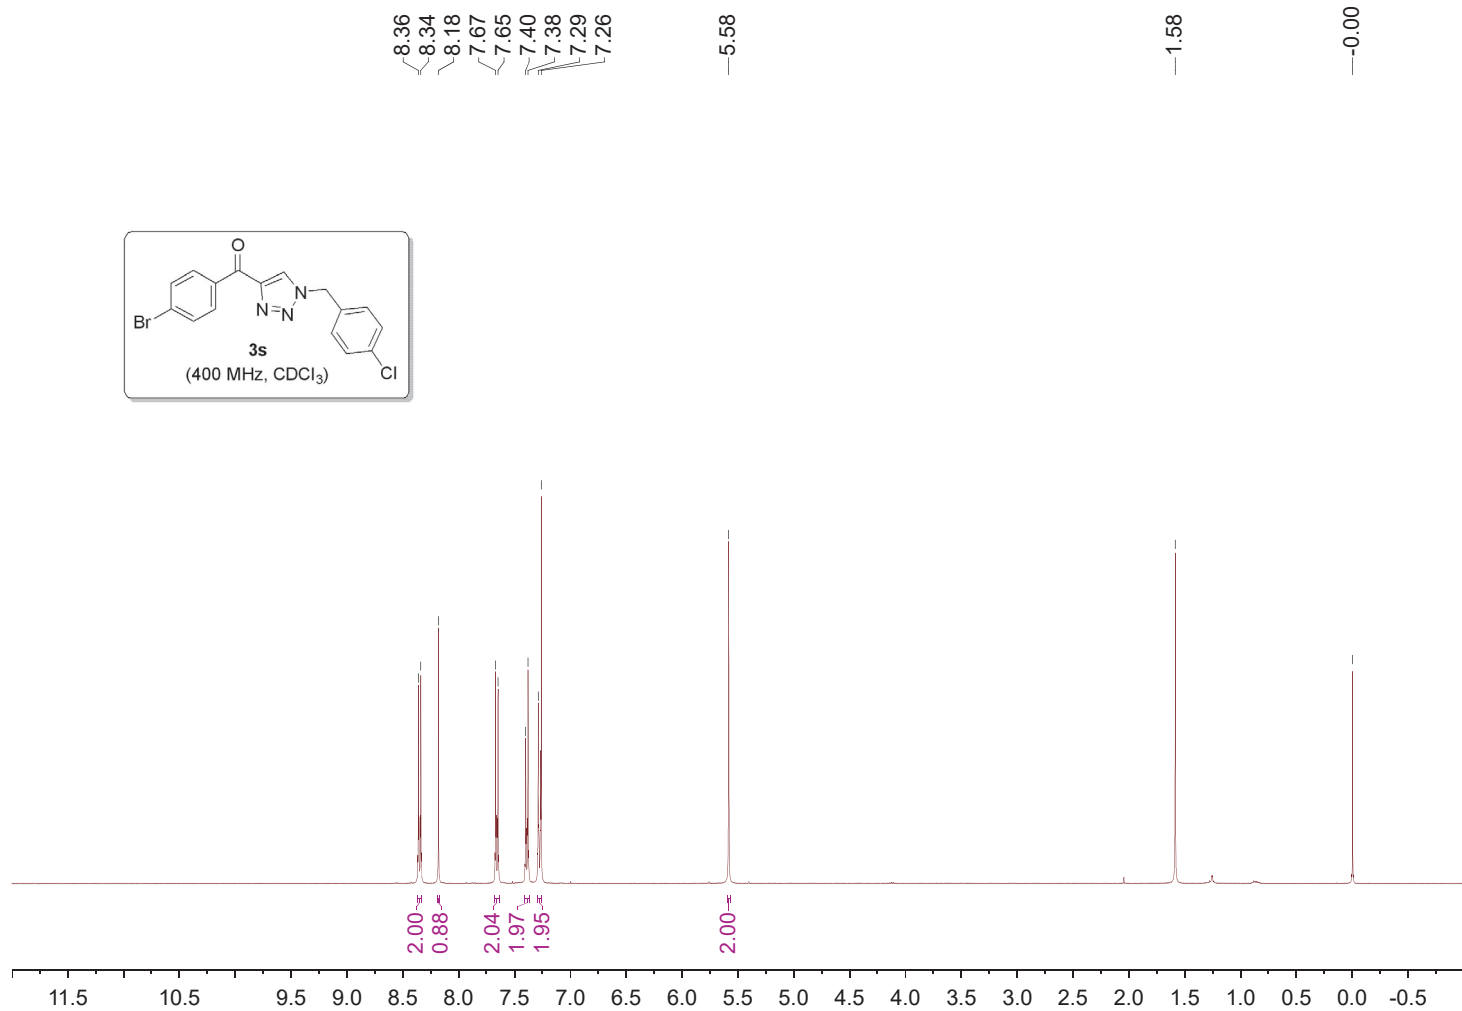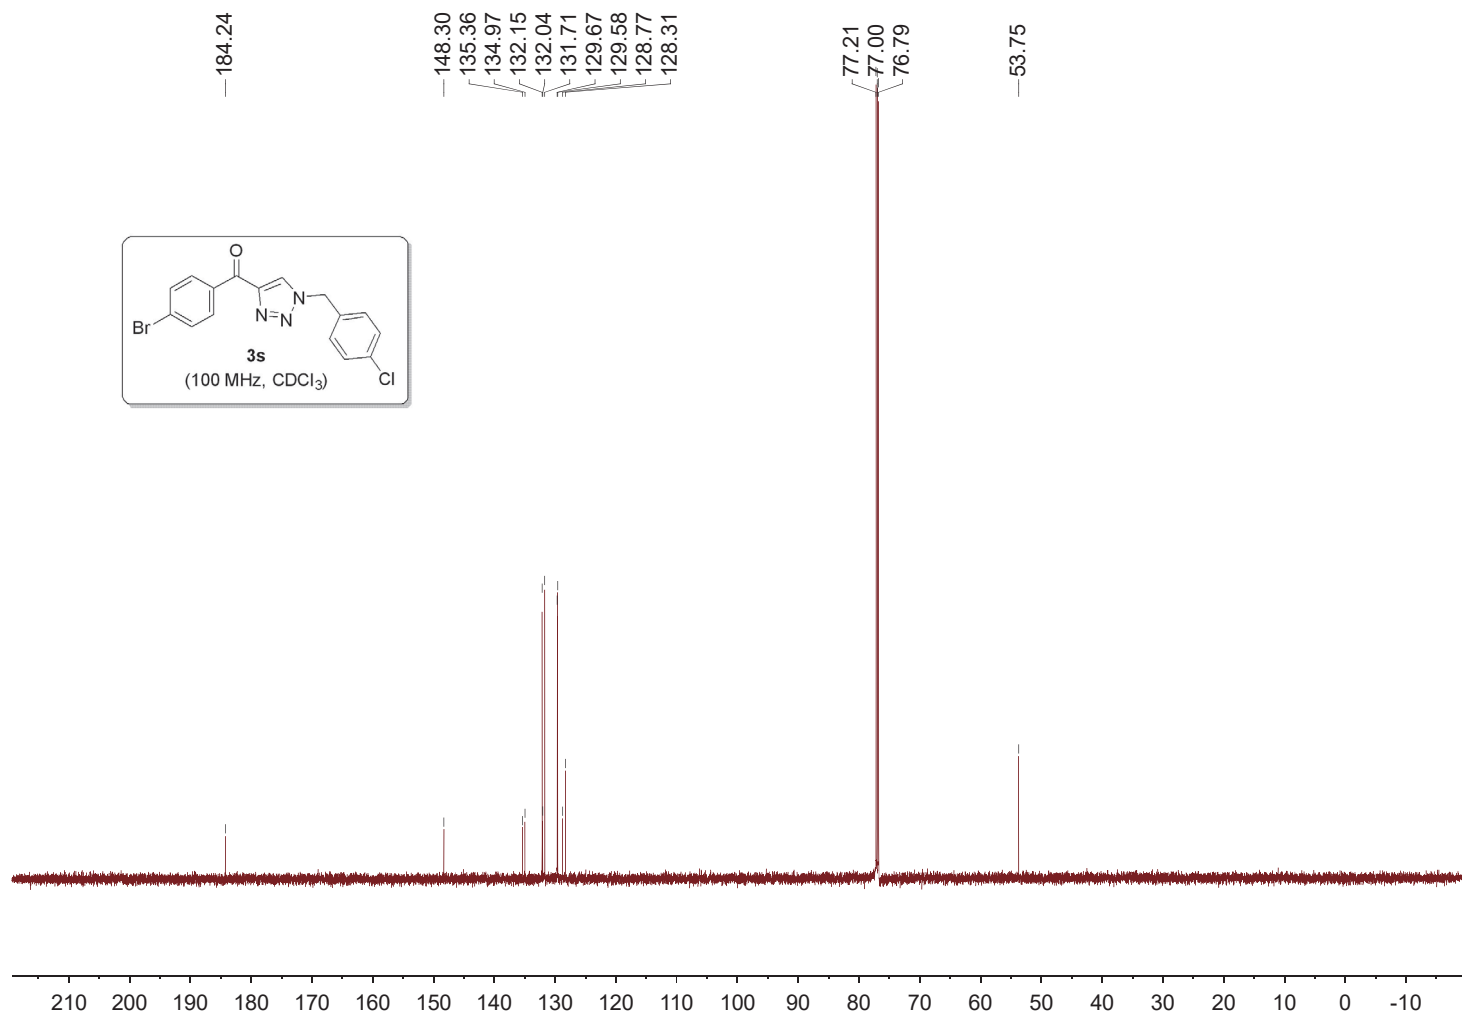

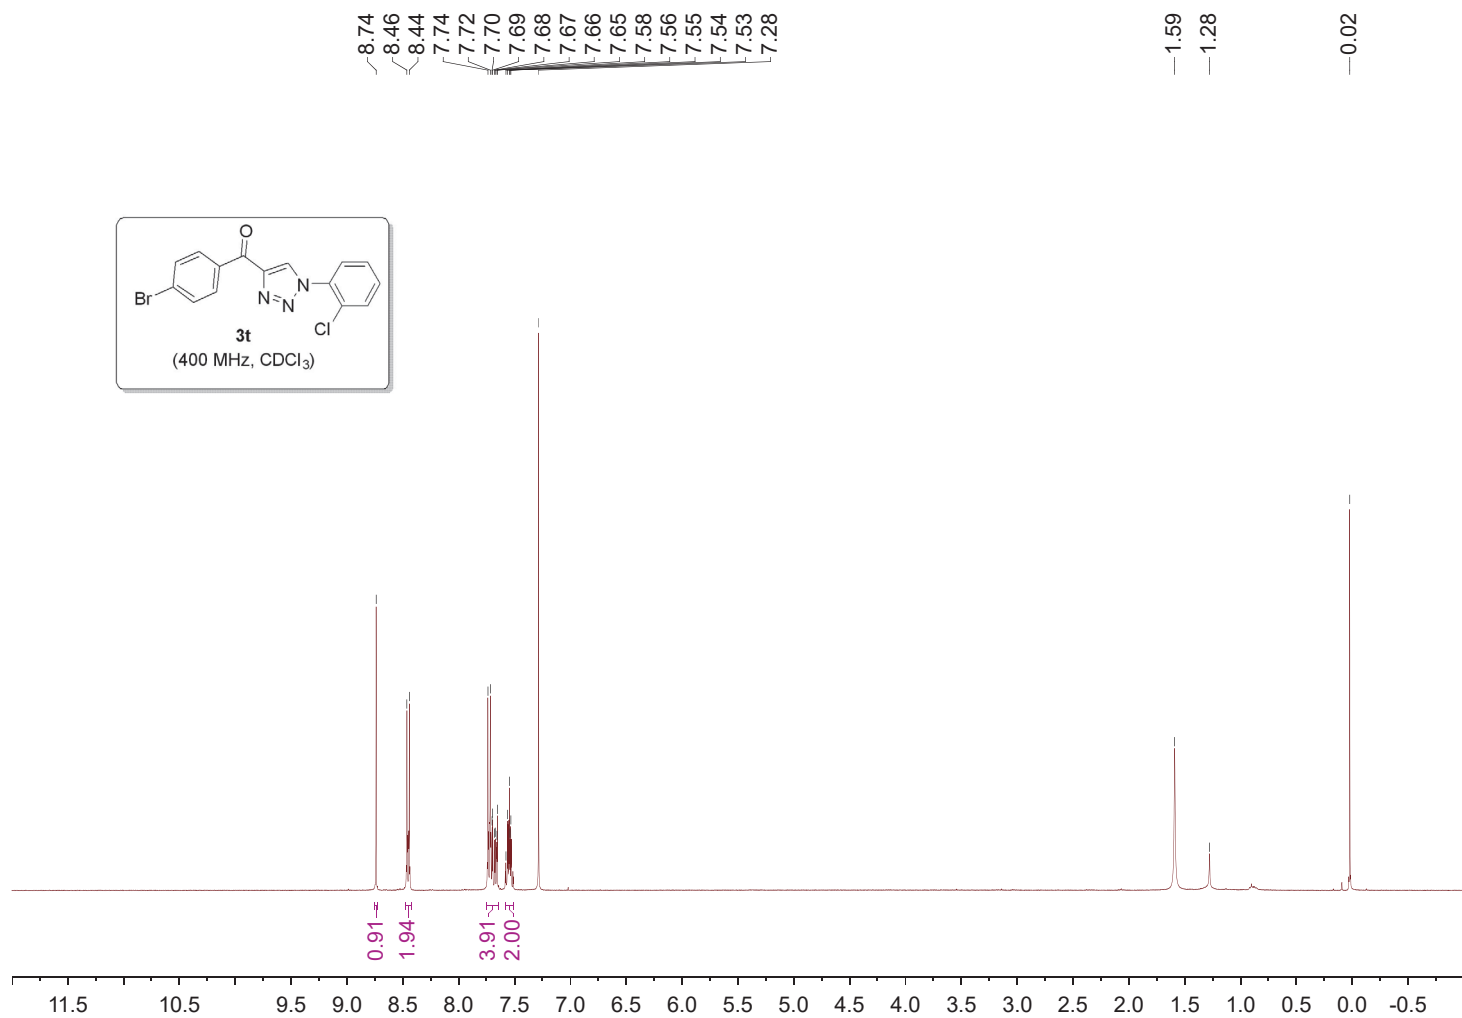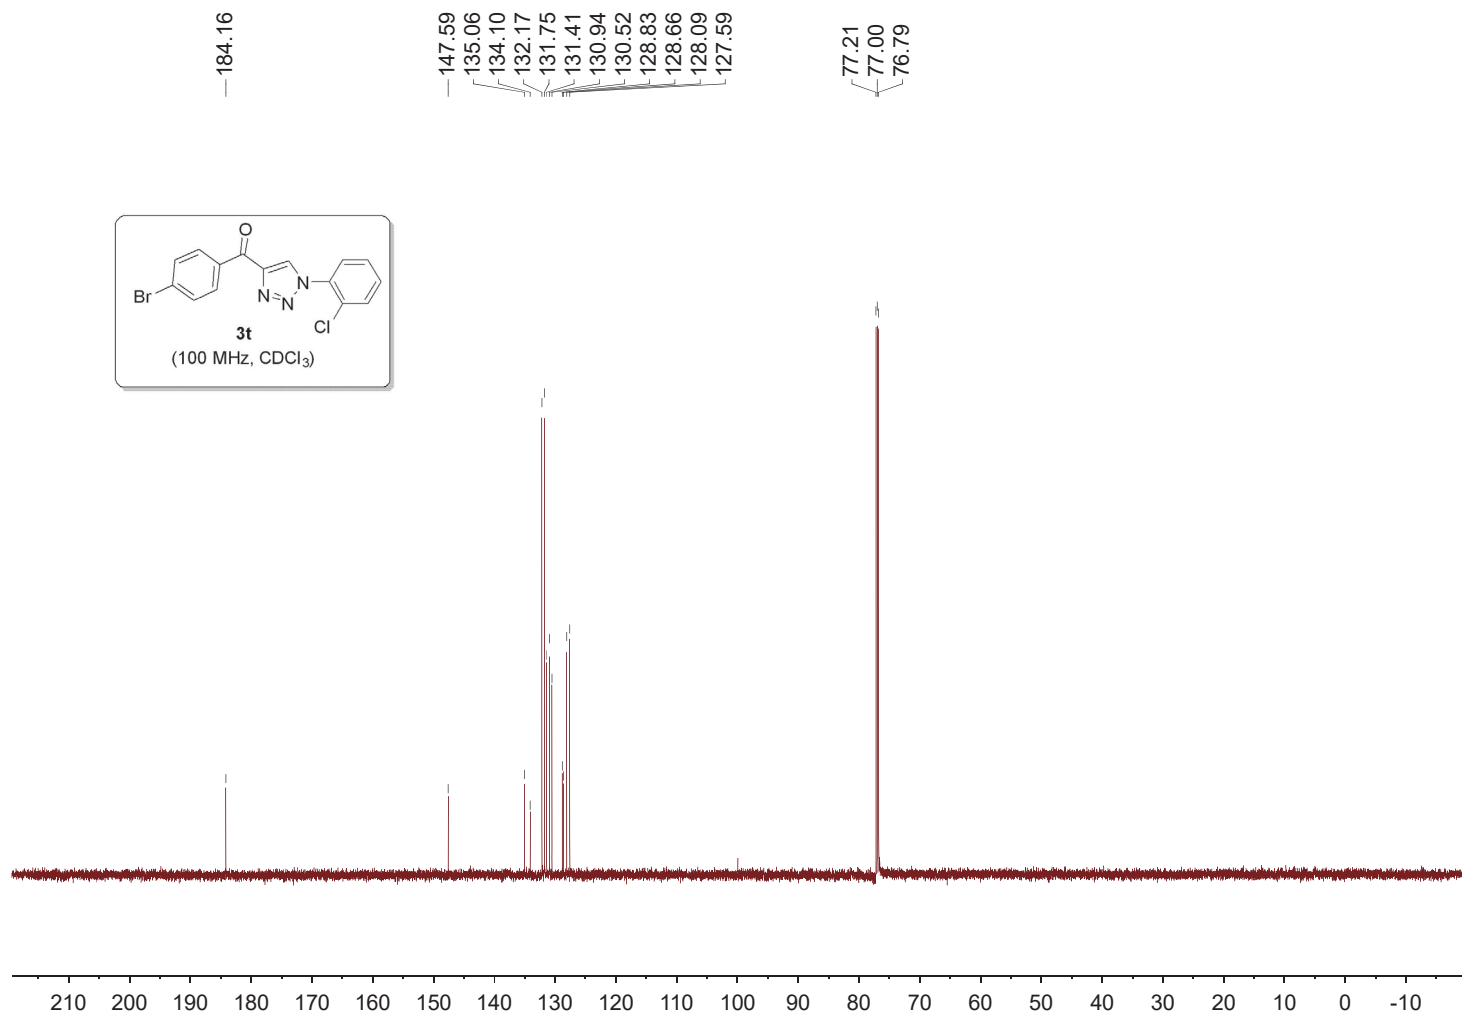

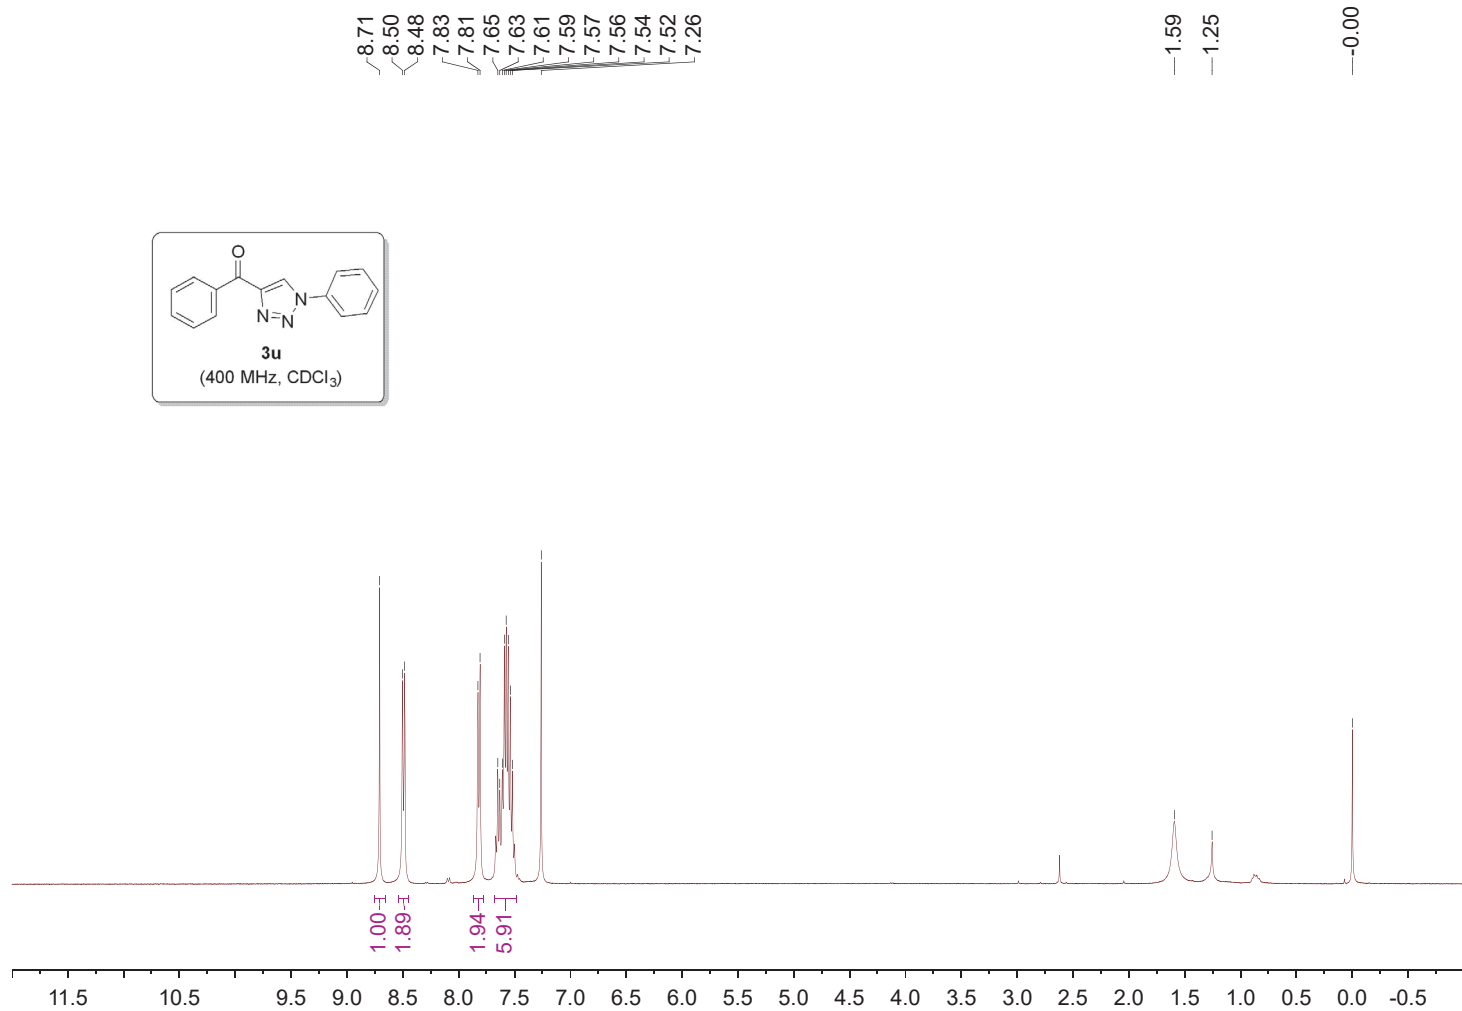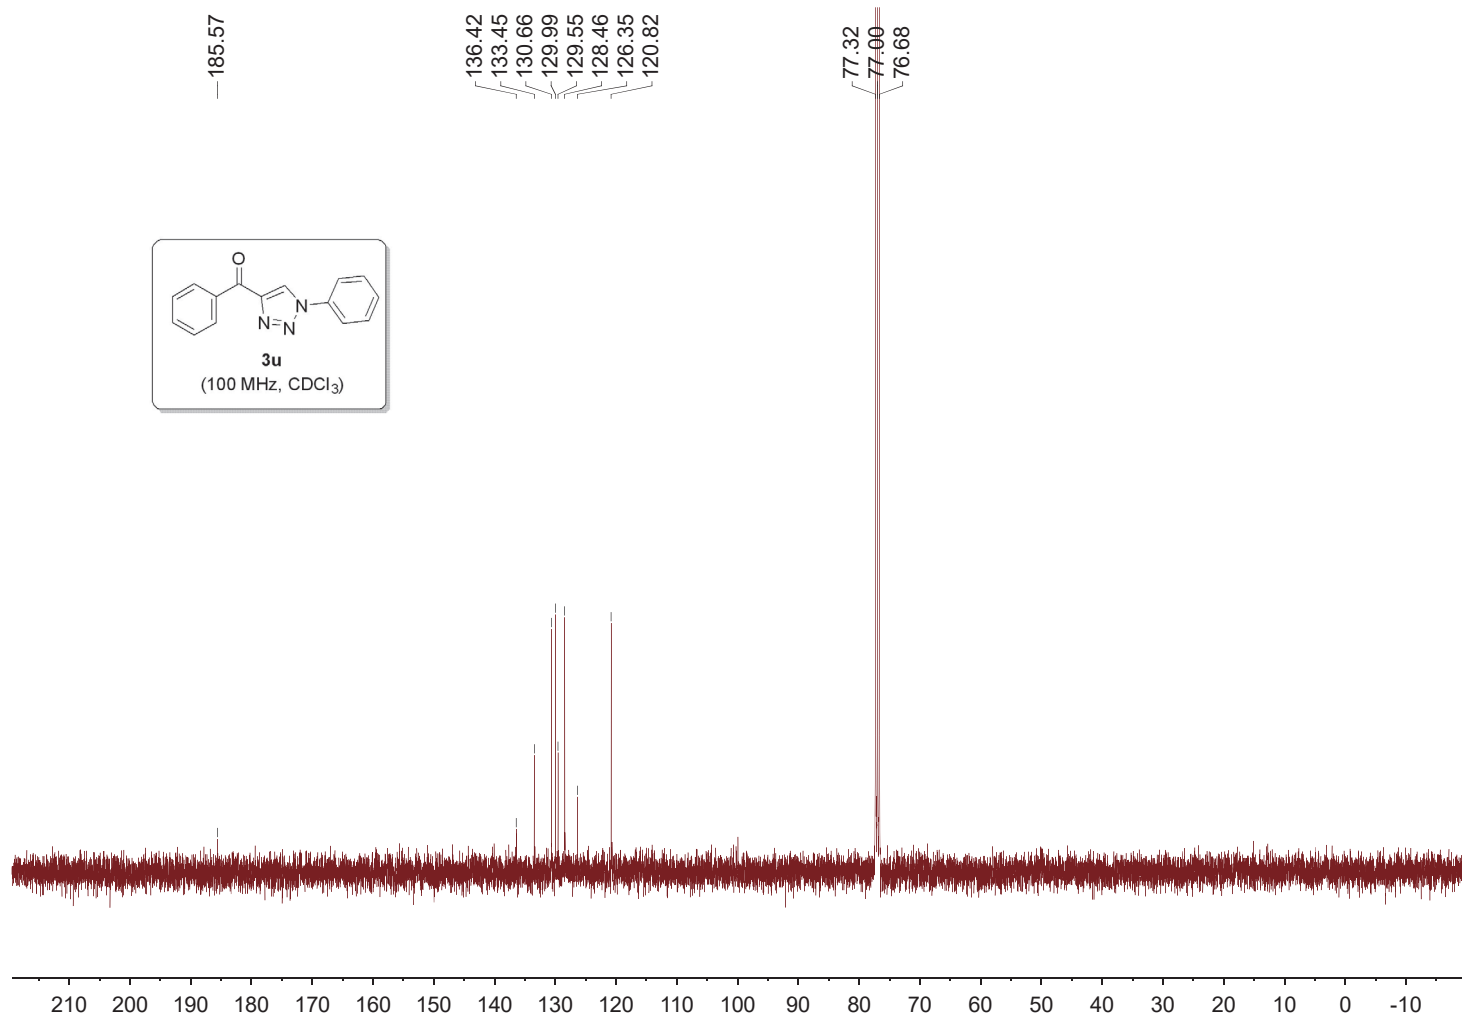

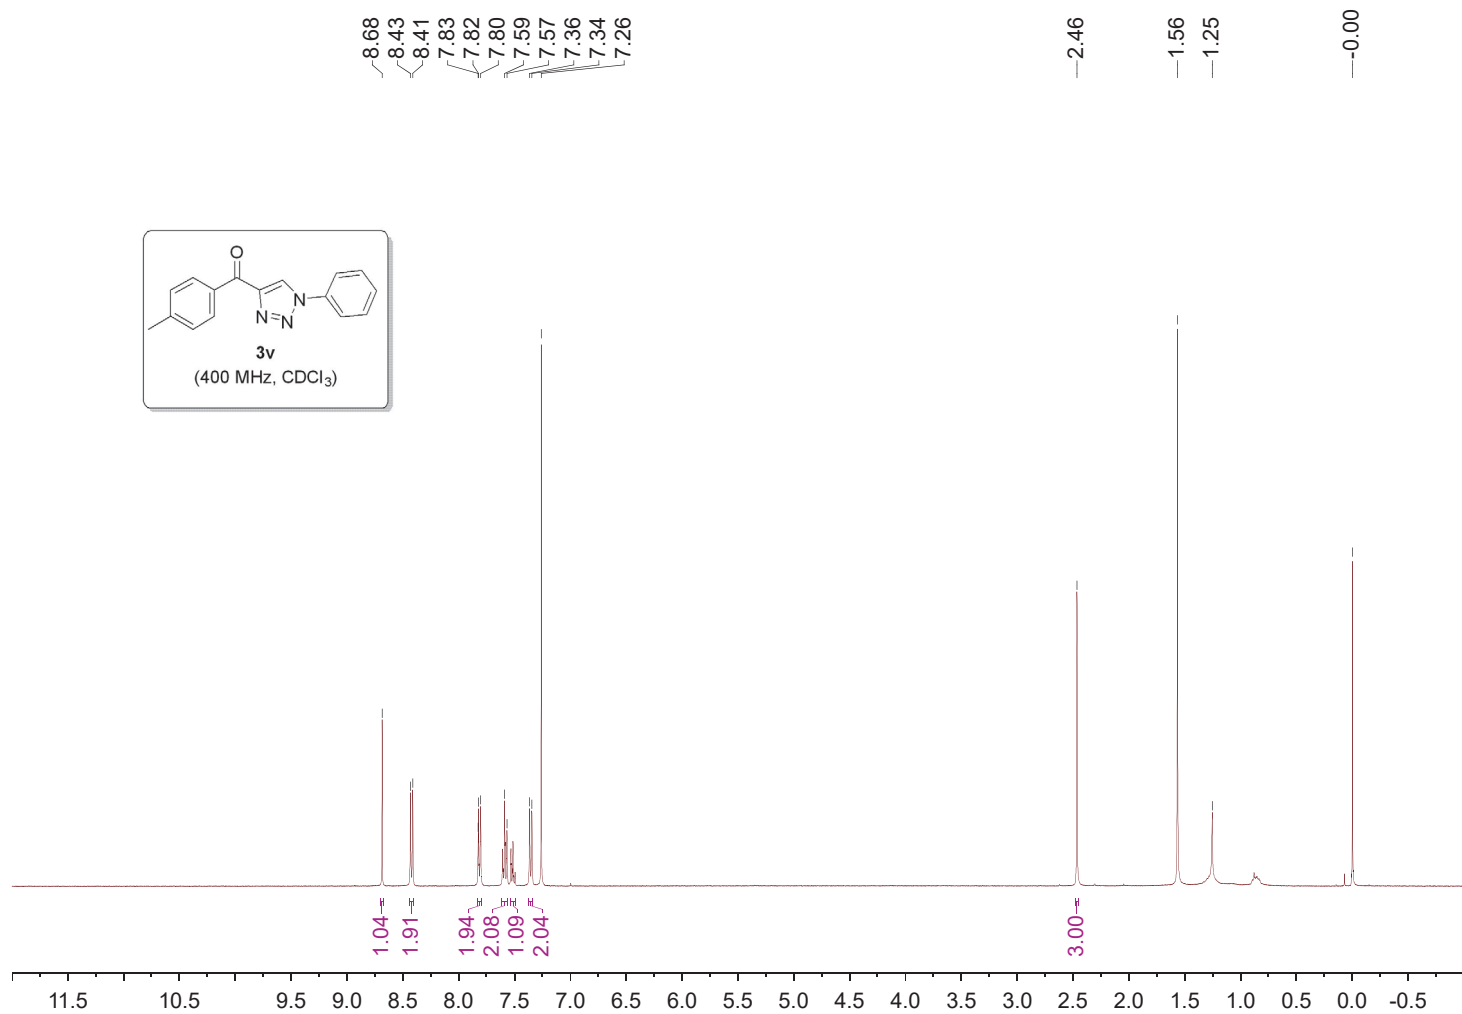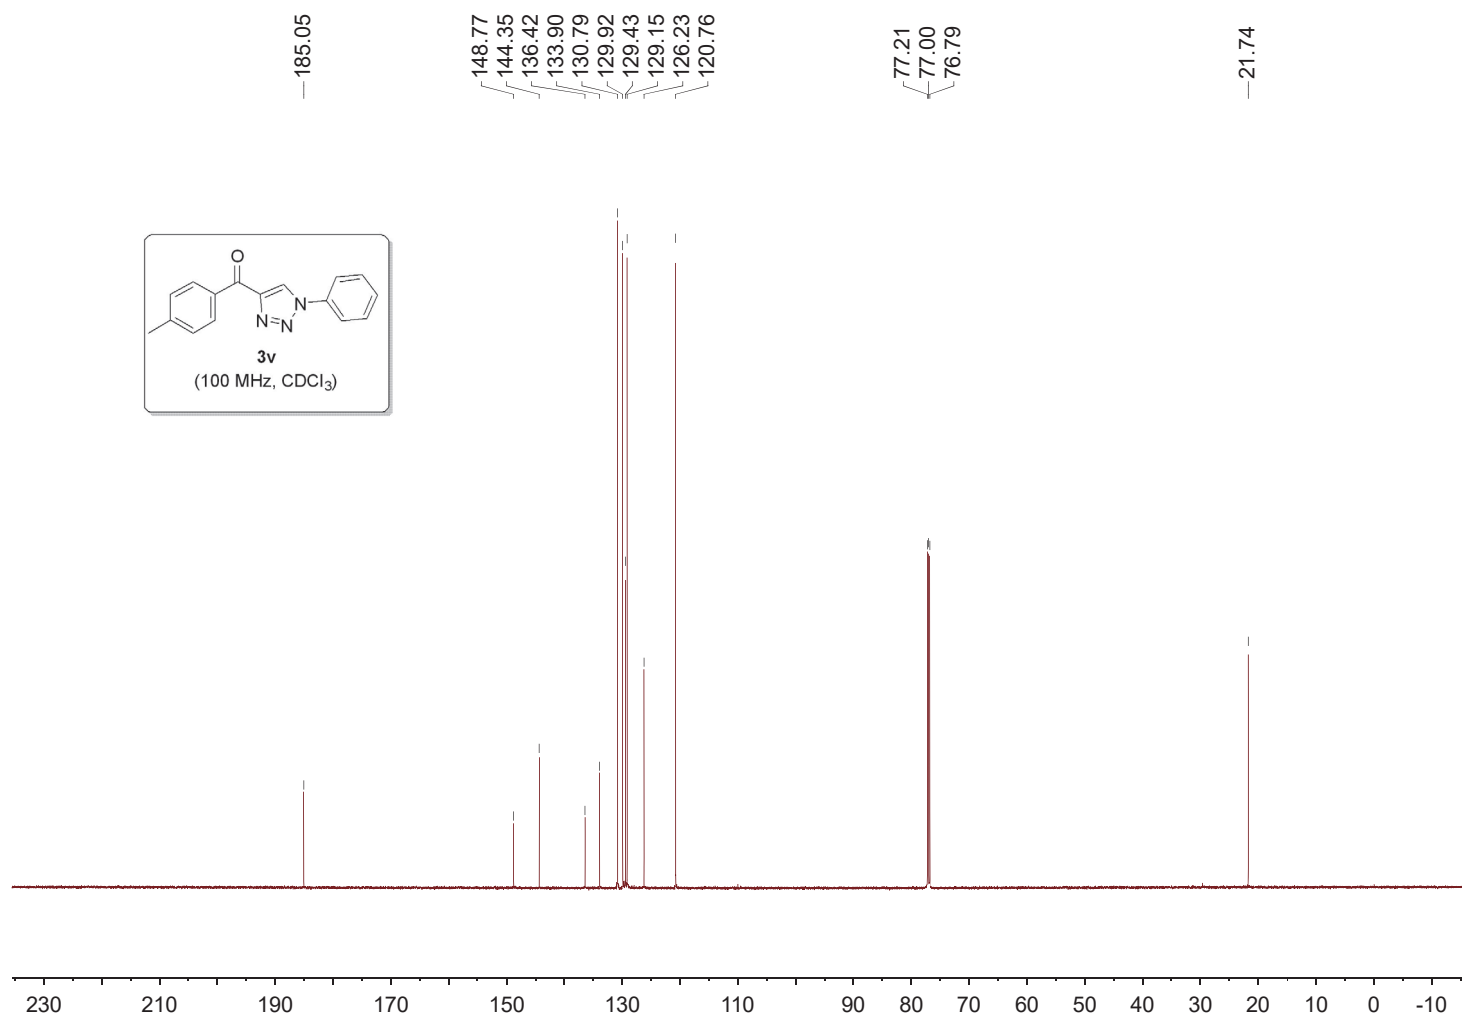



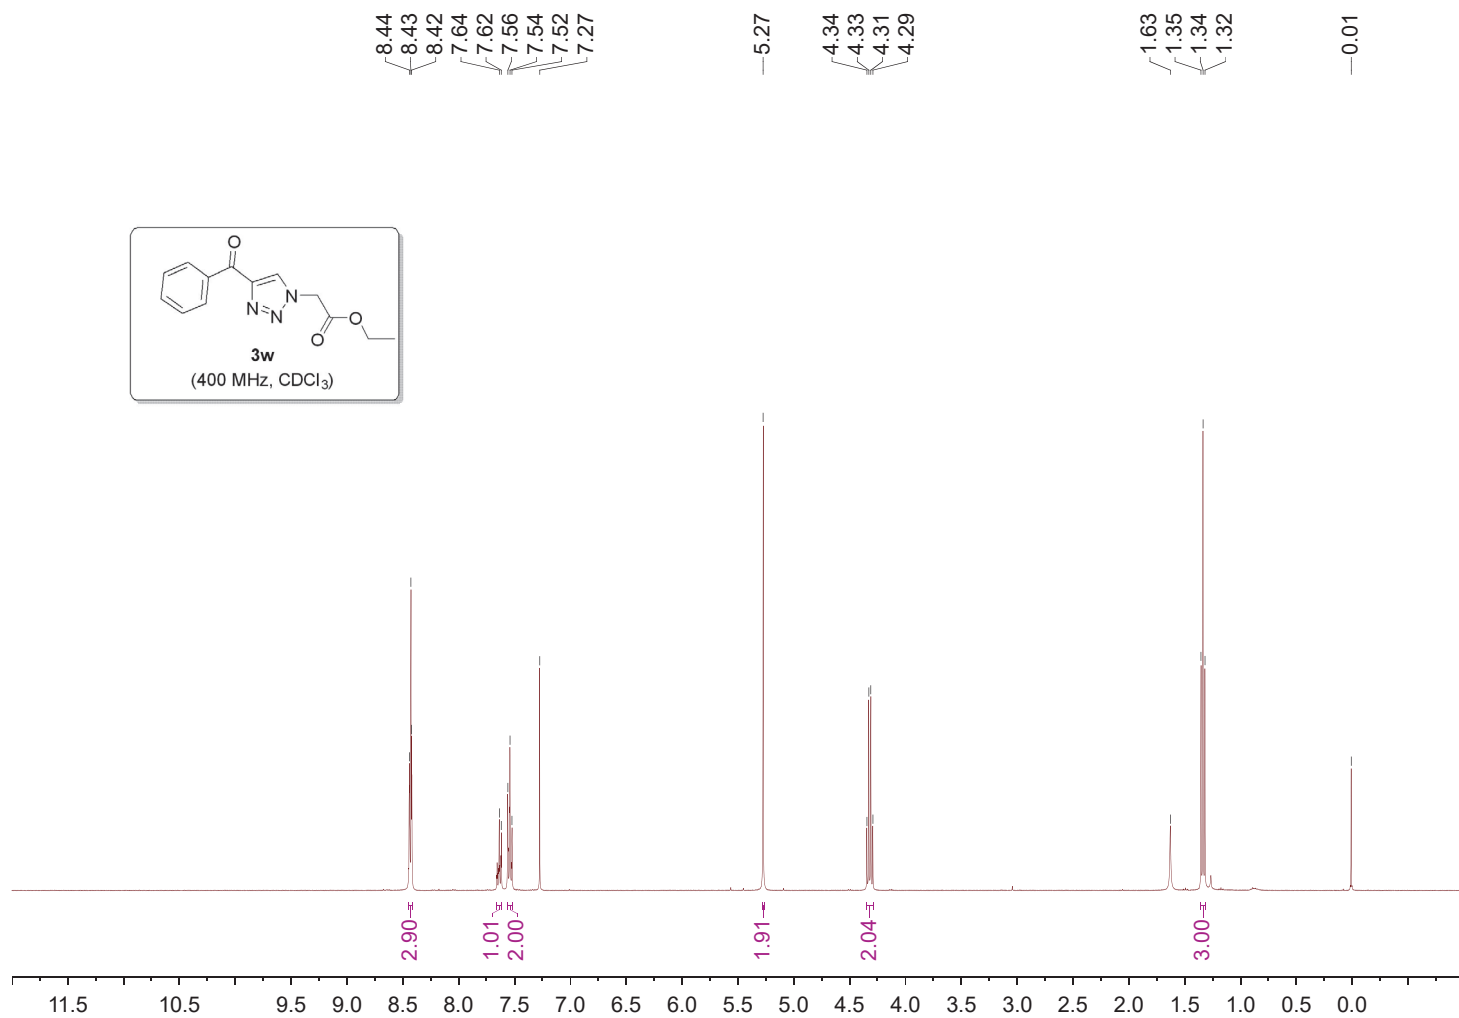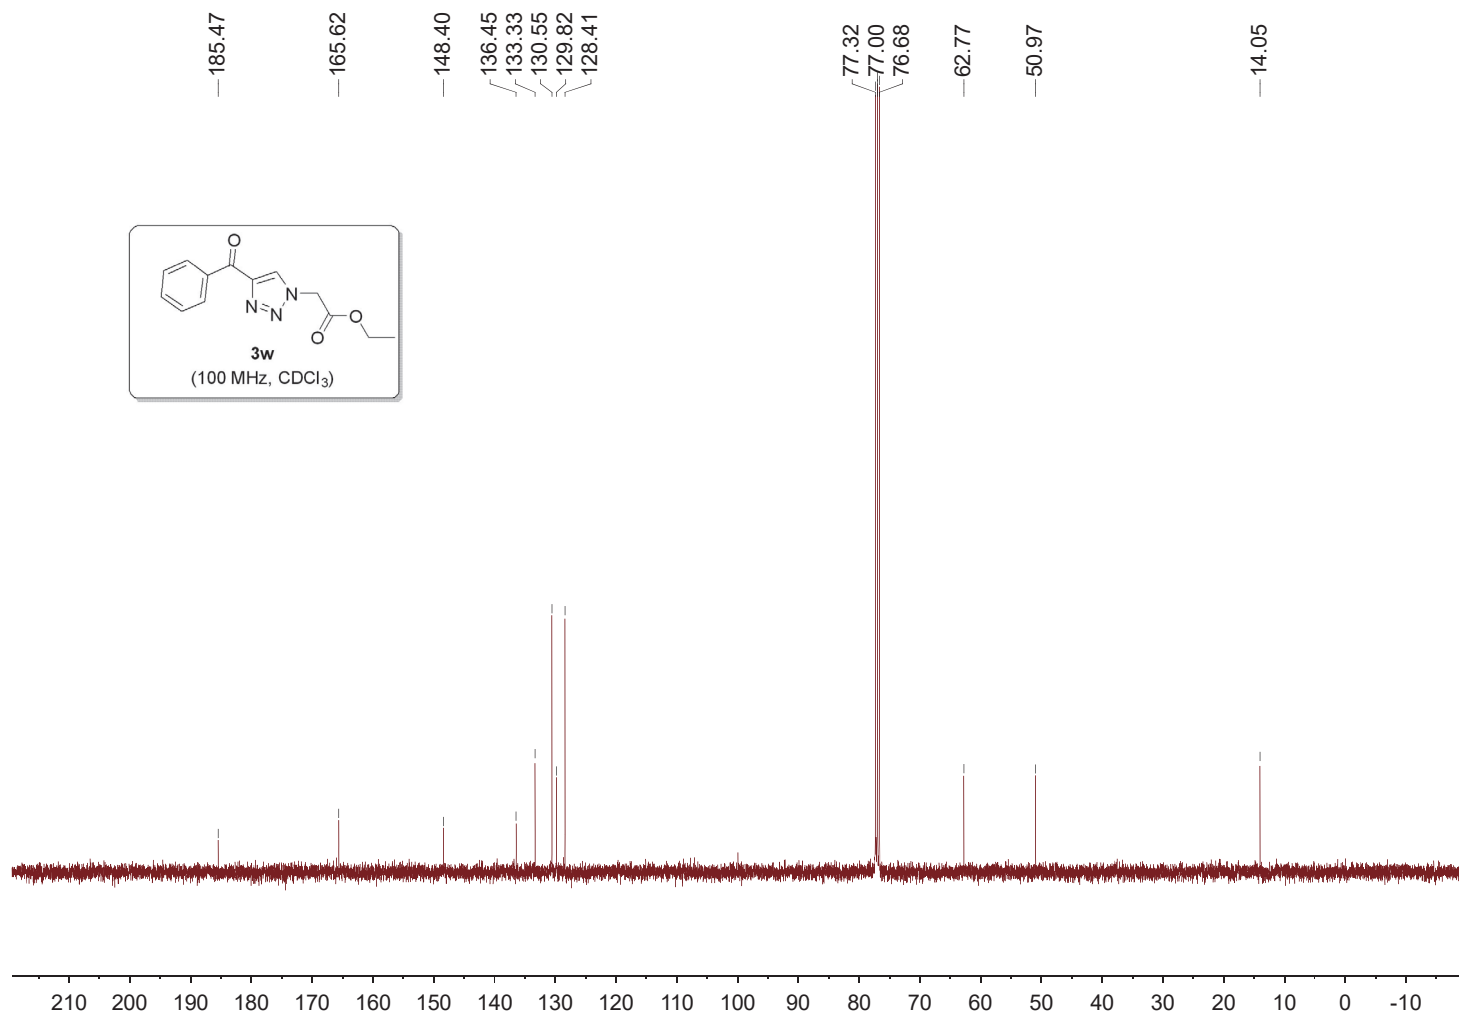

8.39  
8.35  
8.33

7.33  
7.31  
7.26

5.25

4.32  
4.30  
4.29  
4.27

2.44

1.33  
1.31  
1.30

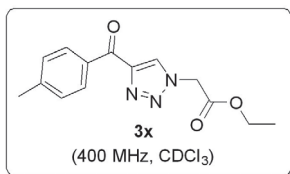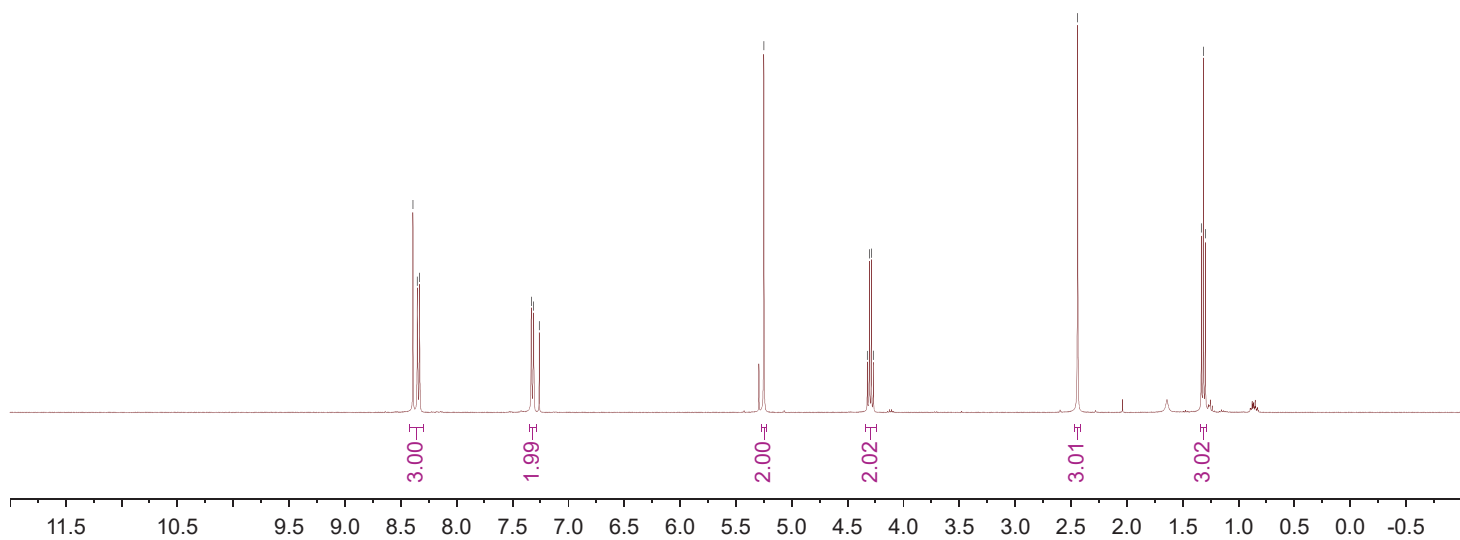

185.03

165.64

148.59

144.25

133.90

130.69

129.70

129.13

77.32

77.00

76.68

62.73

50.95

21.74

14.04

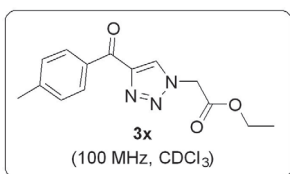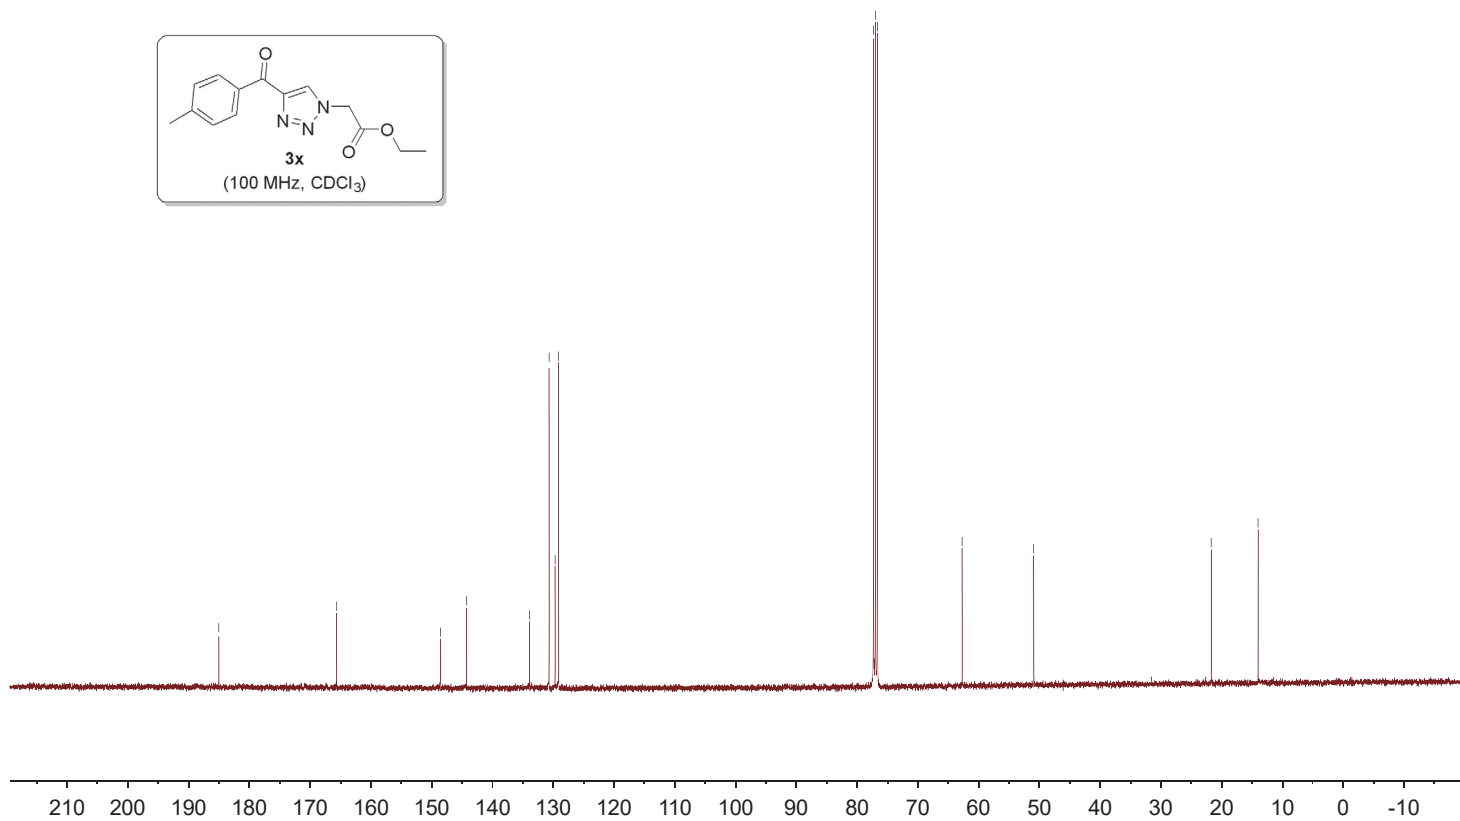

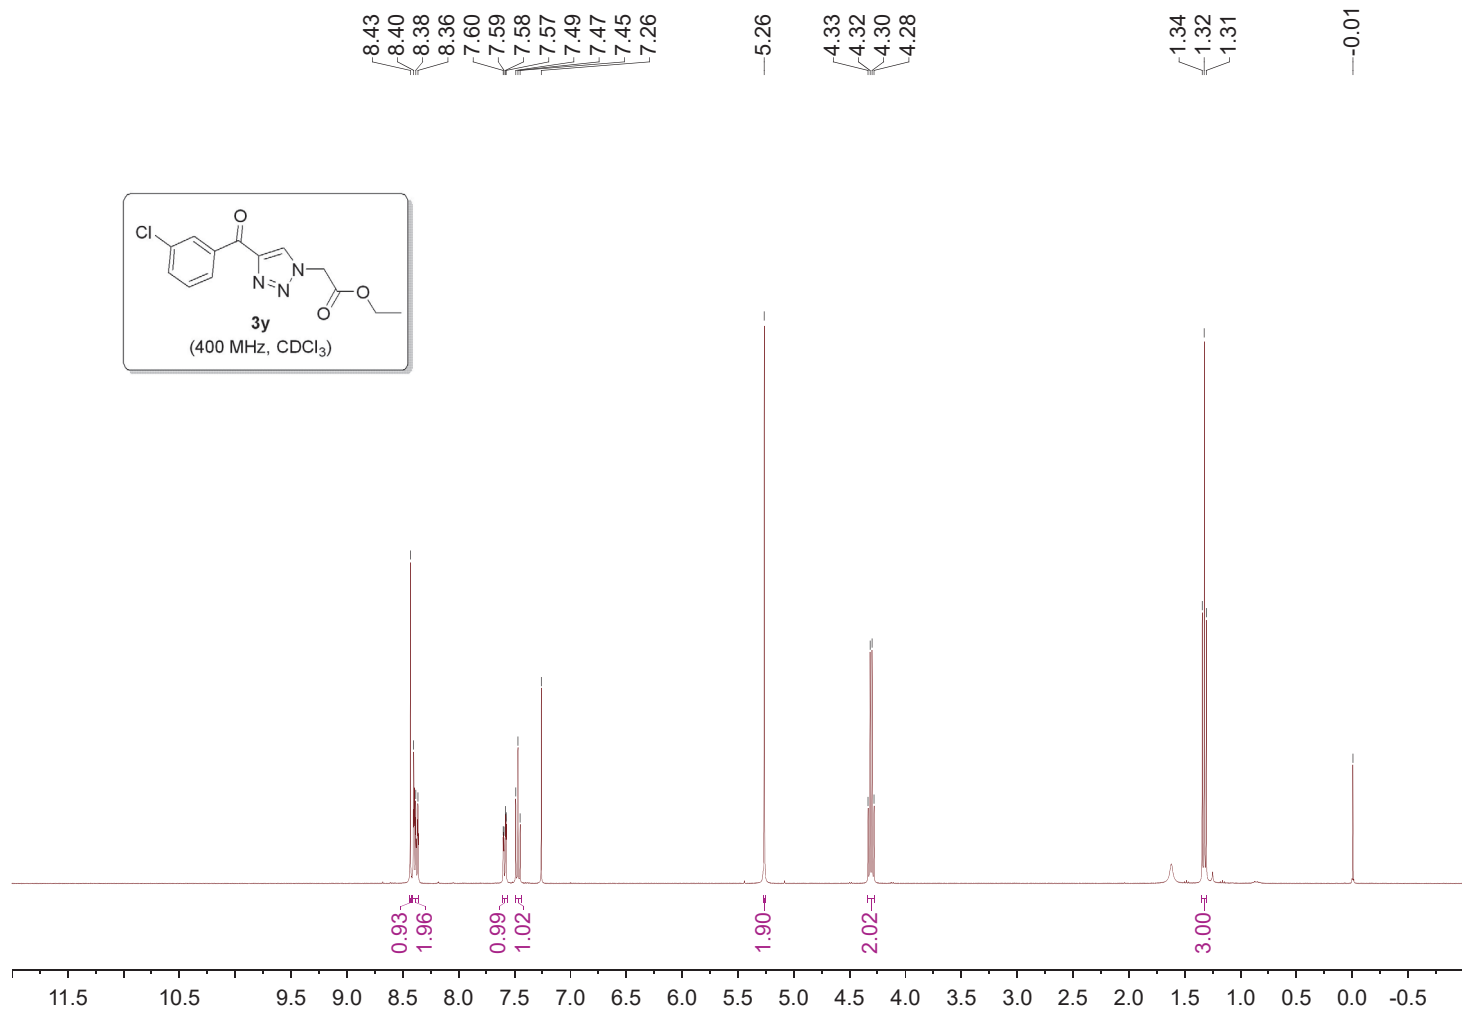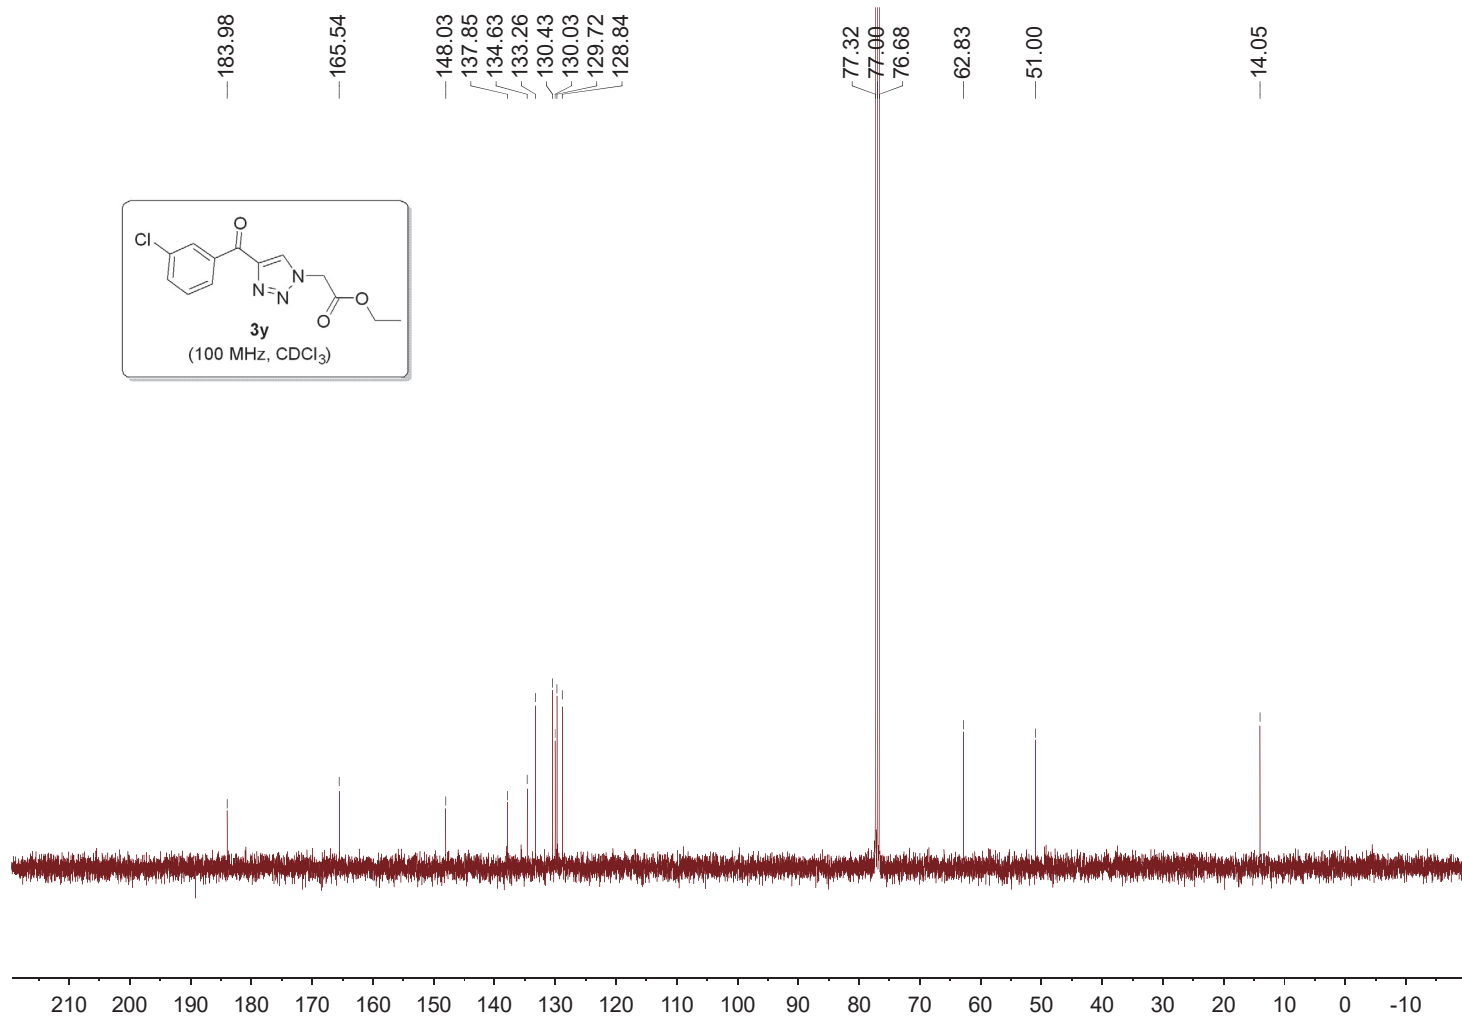

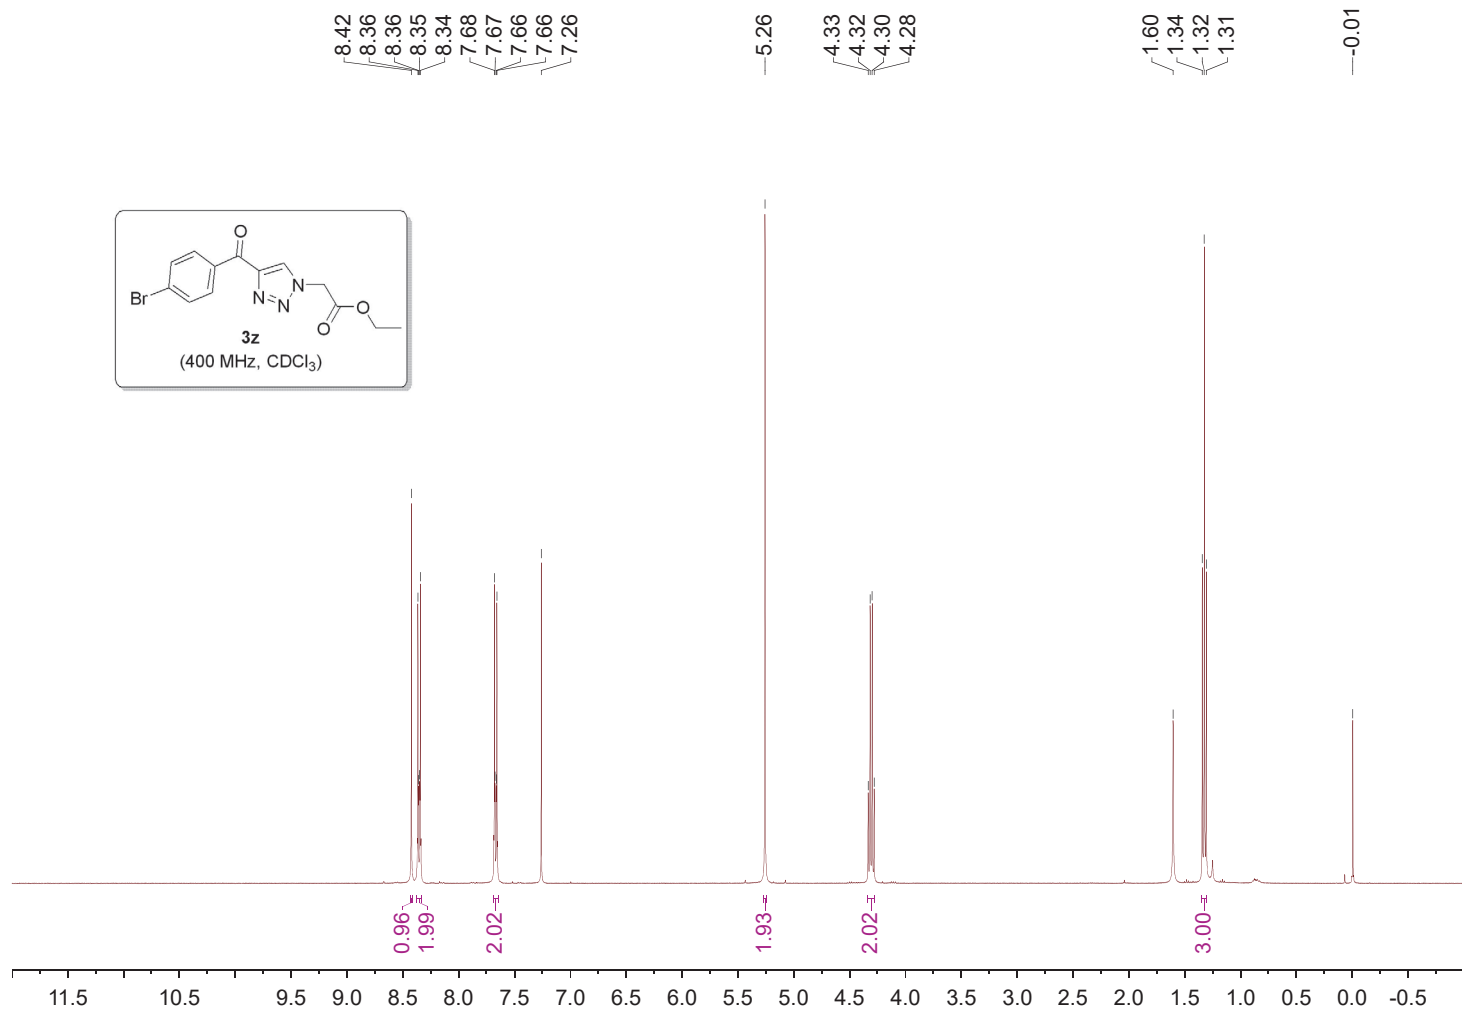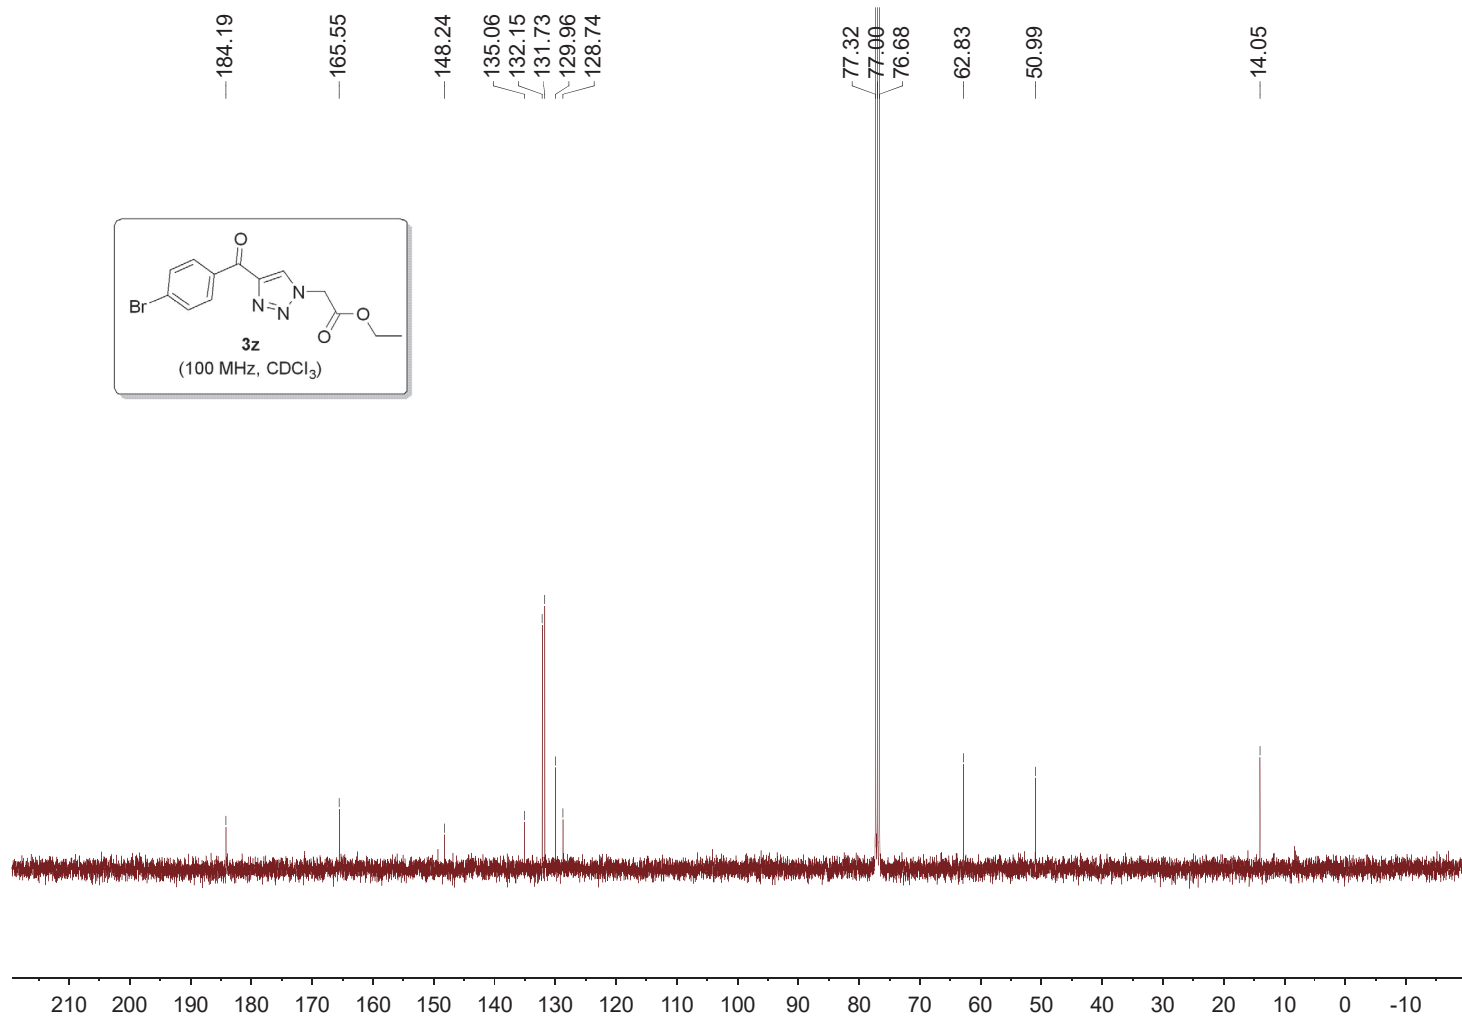

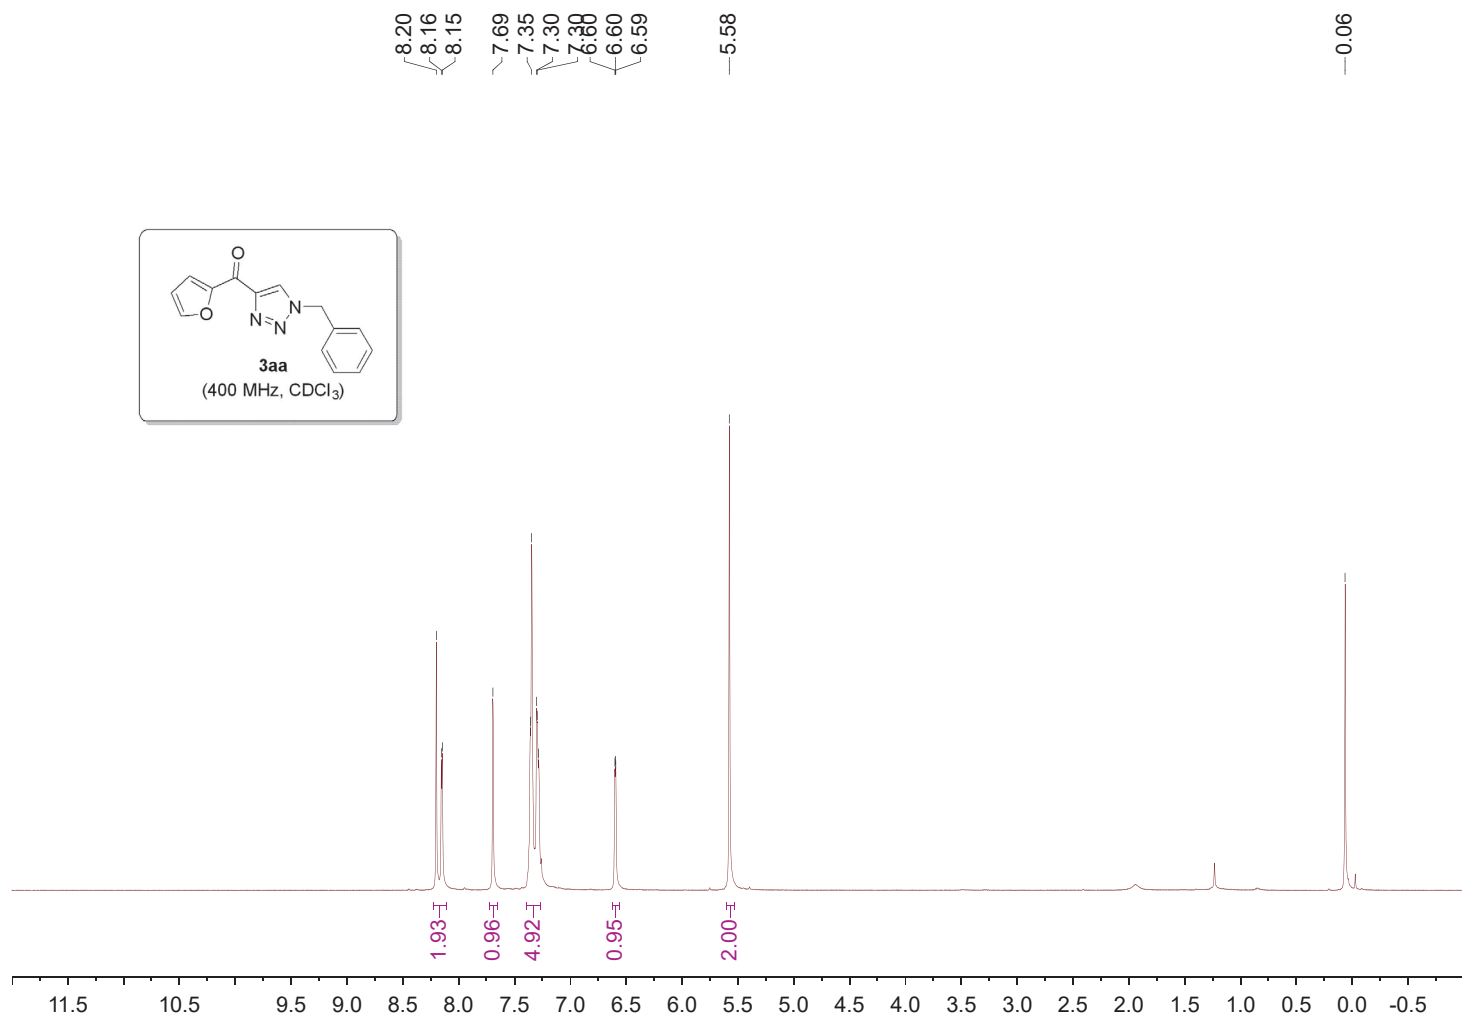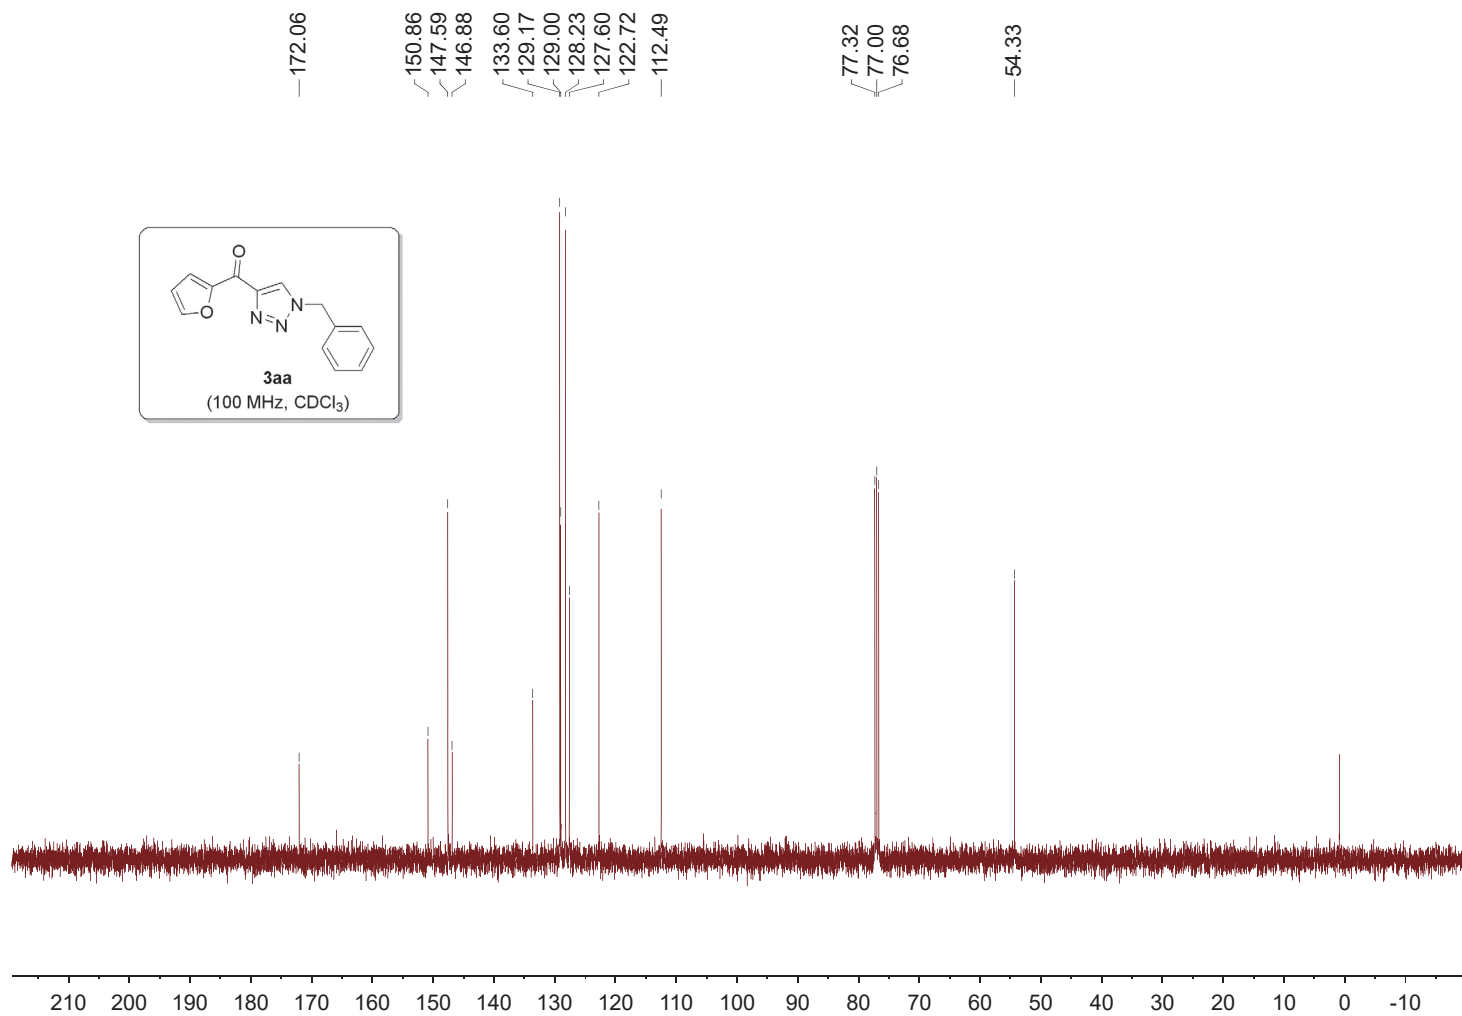

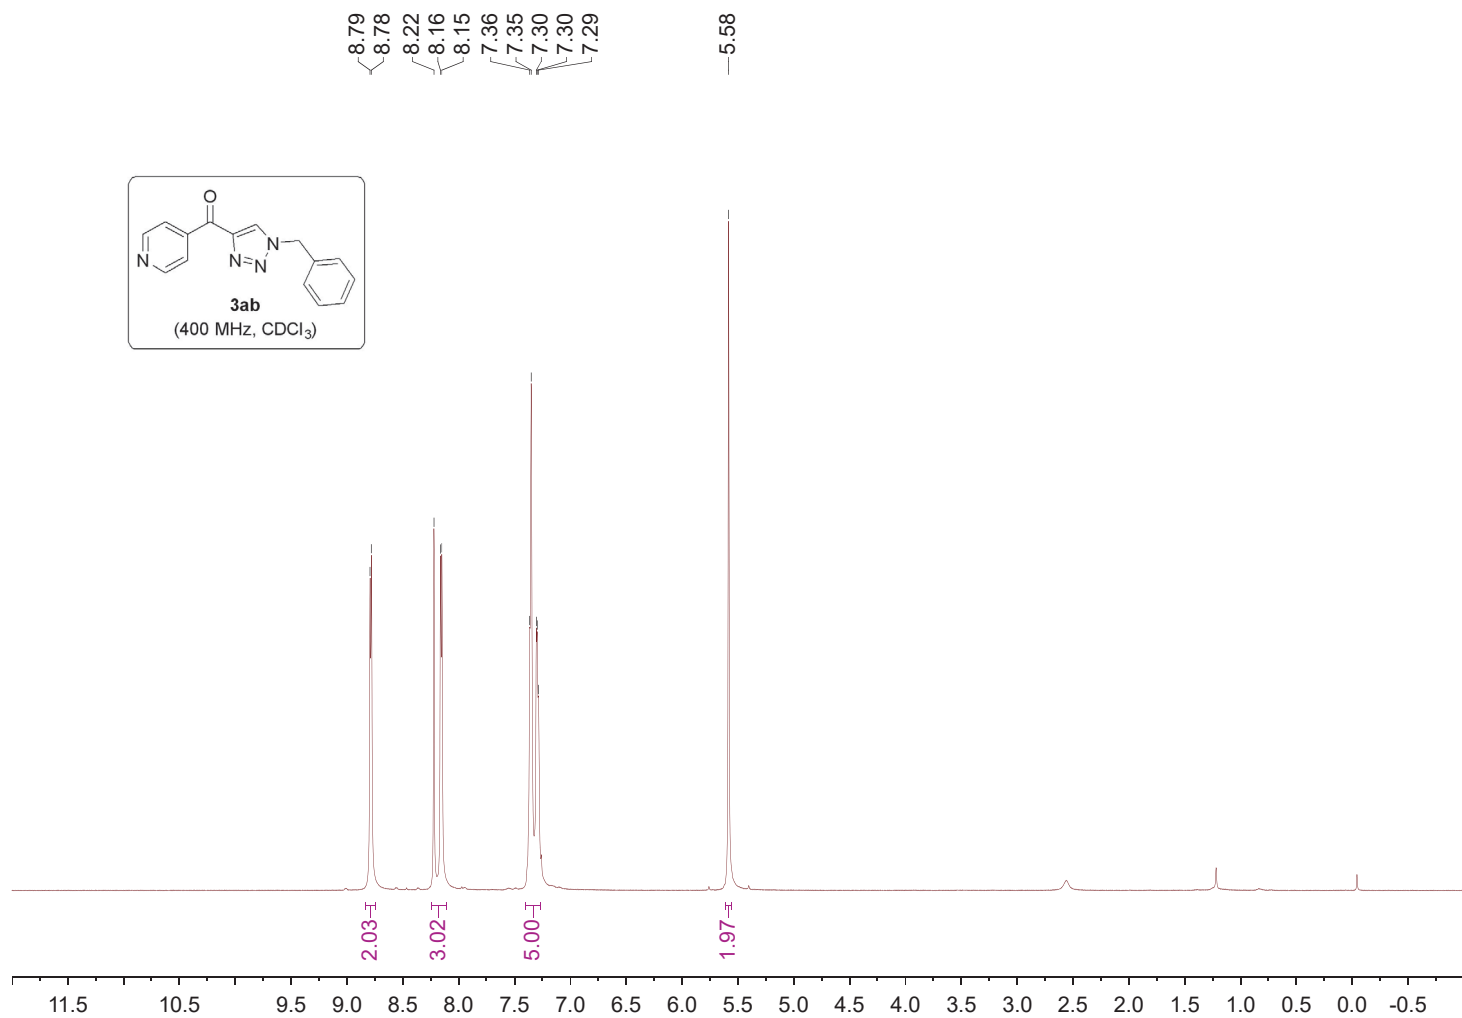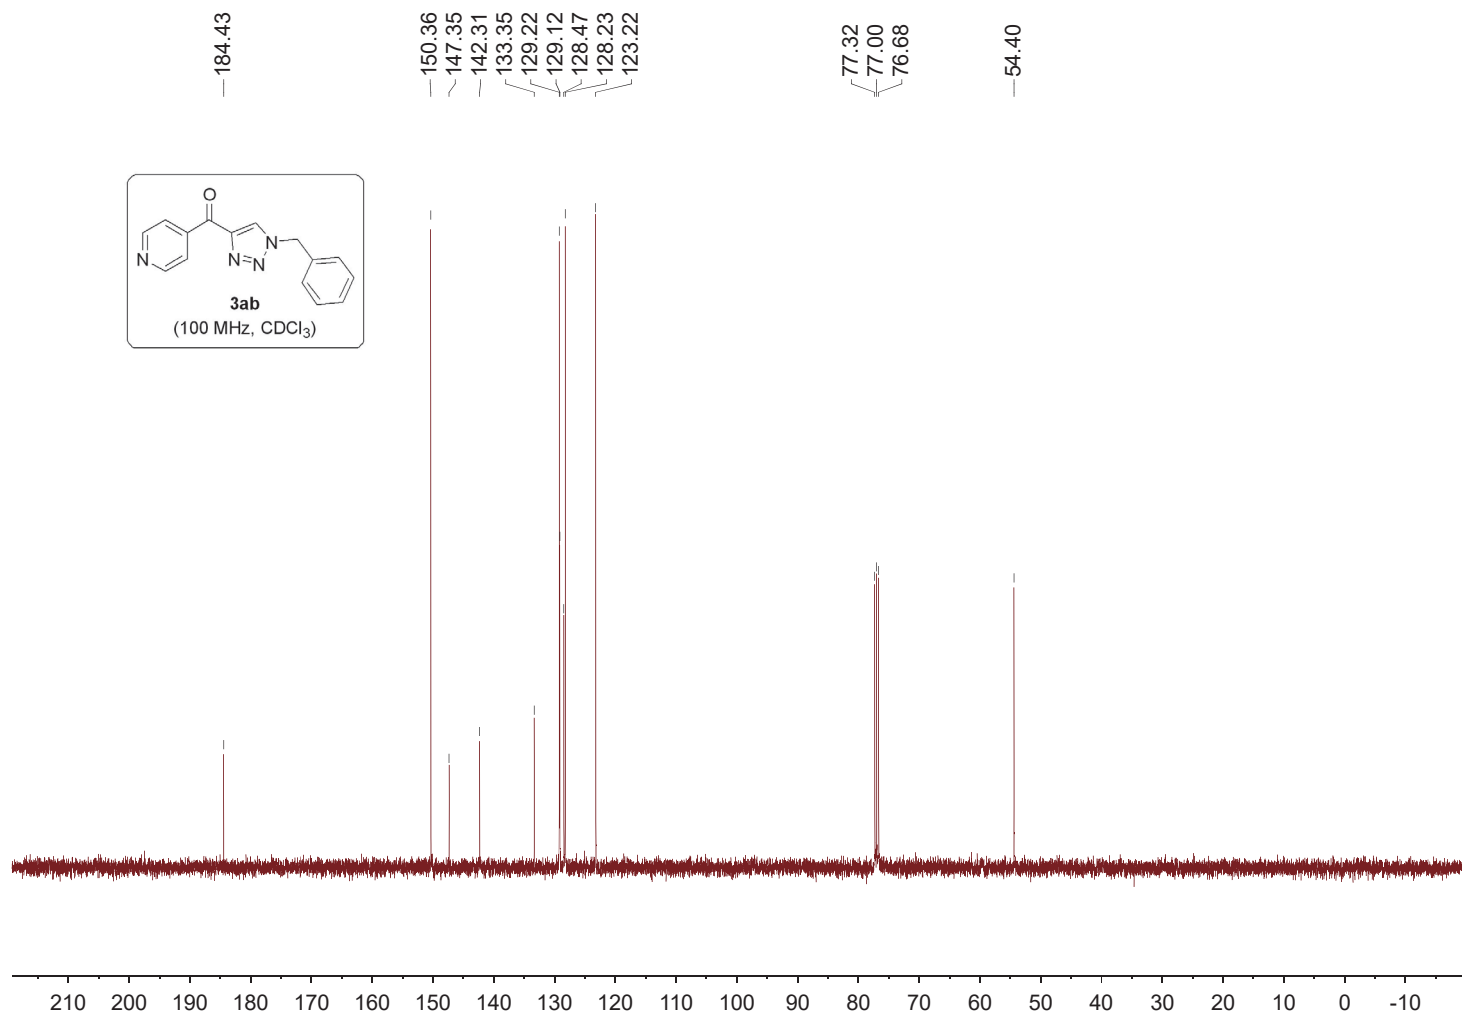

9.24  
8.35  
8.23  
8.05  
7.94  
7.92  
7.89  
7.61  
7.59  
7.57  
7.55  
7.42  
7.40  
7.36  
7.34  
5.63

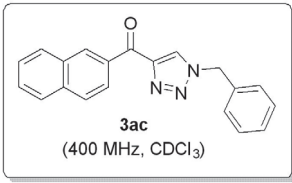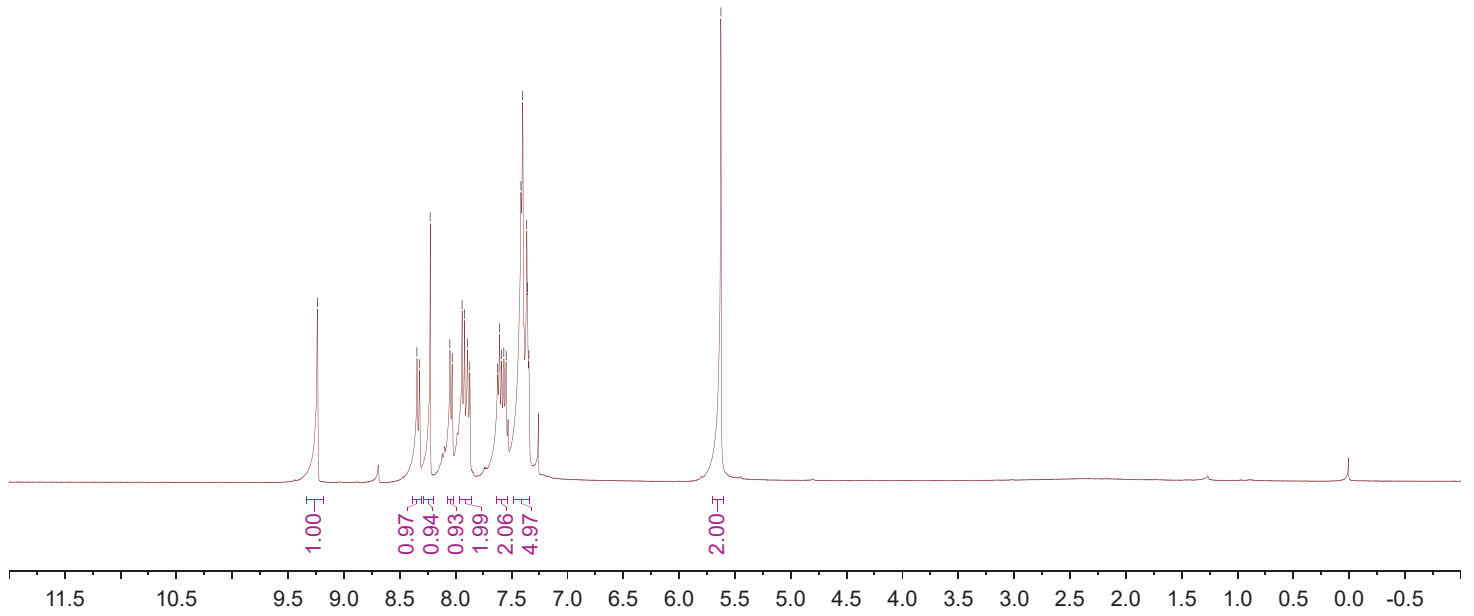

185.27

148.58  
135.67  
133.67  
133.41  
132.46  
131.92  
130.05  
129.29  
129.12  
128.59  
128.35  
128.10  
127.65  
126.54  
125.44  
77.32  
77.00  
76.68

54.45

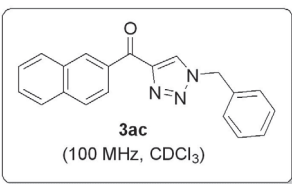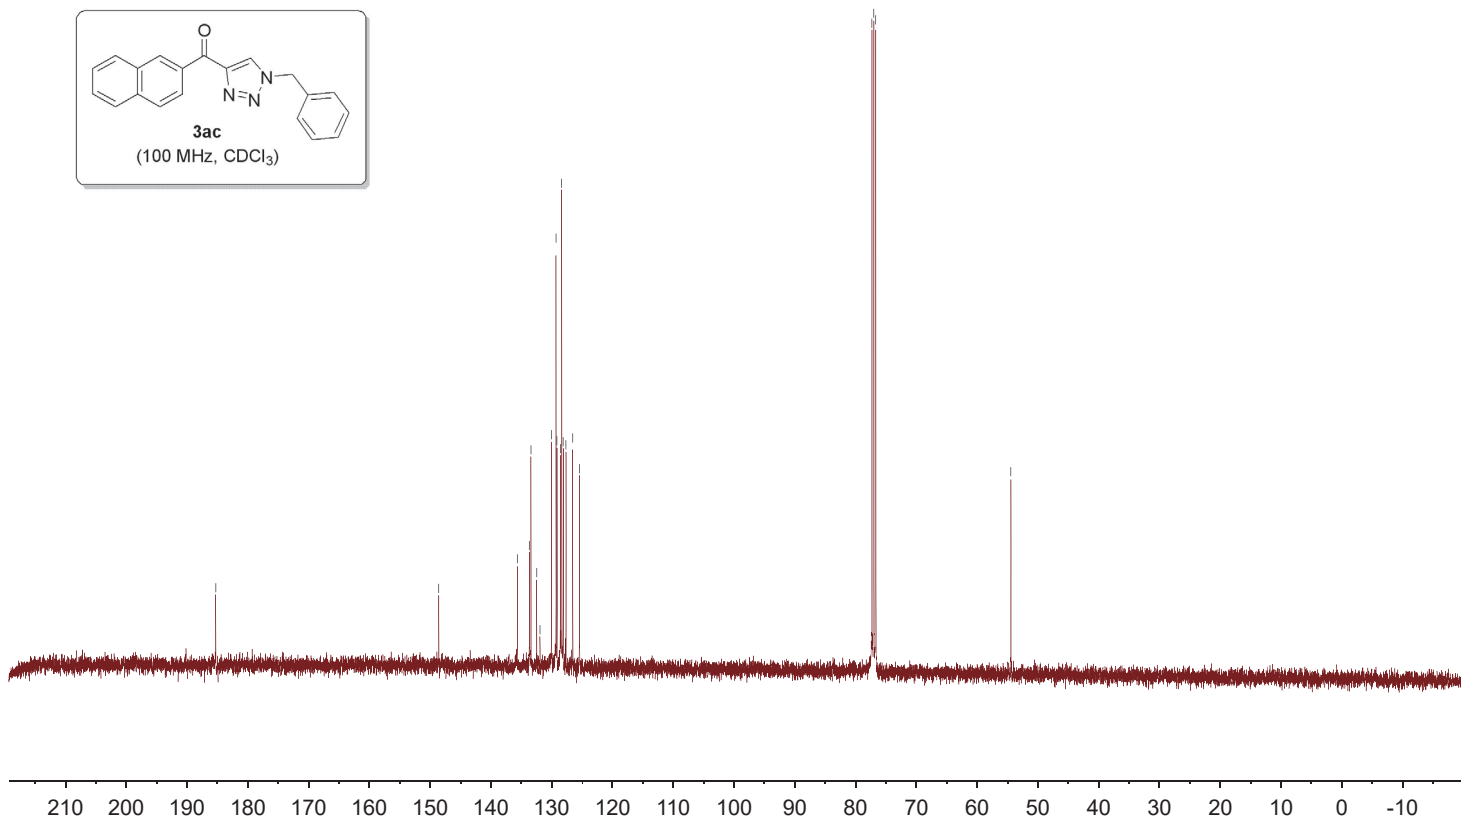

8.63  
8.61  
8.42  
8.16  
7.56  
7.44  
7.42  
7.41  
7.40  
7.37  
7.35  
7.33  
7.30  
7.26  
7.09  
7.07  
5.60  
—3.92

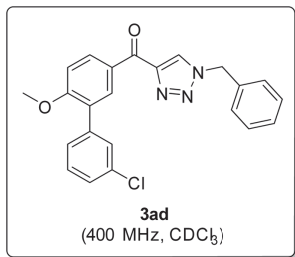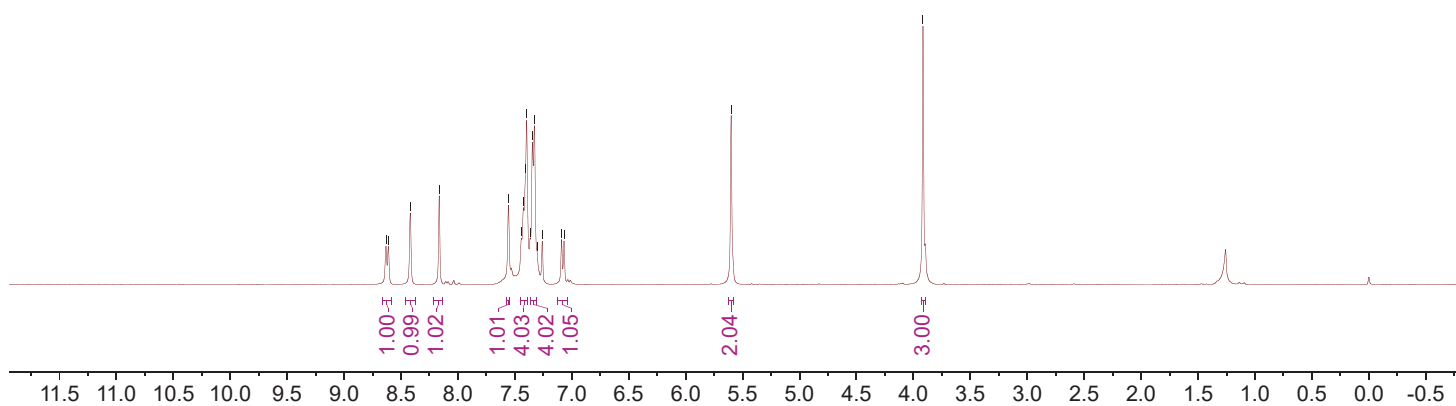

—183.83

—160.54

148.70  
139.33  
133.81  
133.68  
133.42  
133.04  
129.65  
129.45  
129.32  
129.29  
129.23  
129.16  
128.39  
128.14  
127.79  
127.36  
110.56

77.32  
77.00  
76.68  
133.81  
133.68  
133.42  
—133.04  
55.87  
54.46

129.65  
129.45  
129.32  
129.29  
129.23  
129.16  
128.39  
128.14  
127.79  
127.36

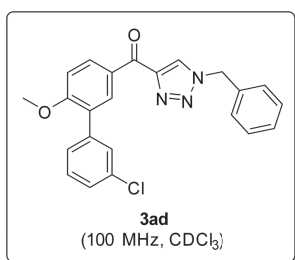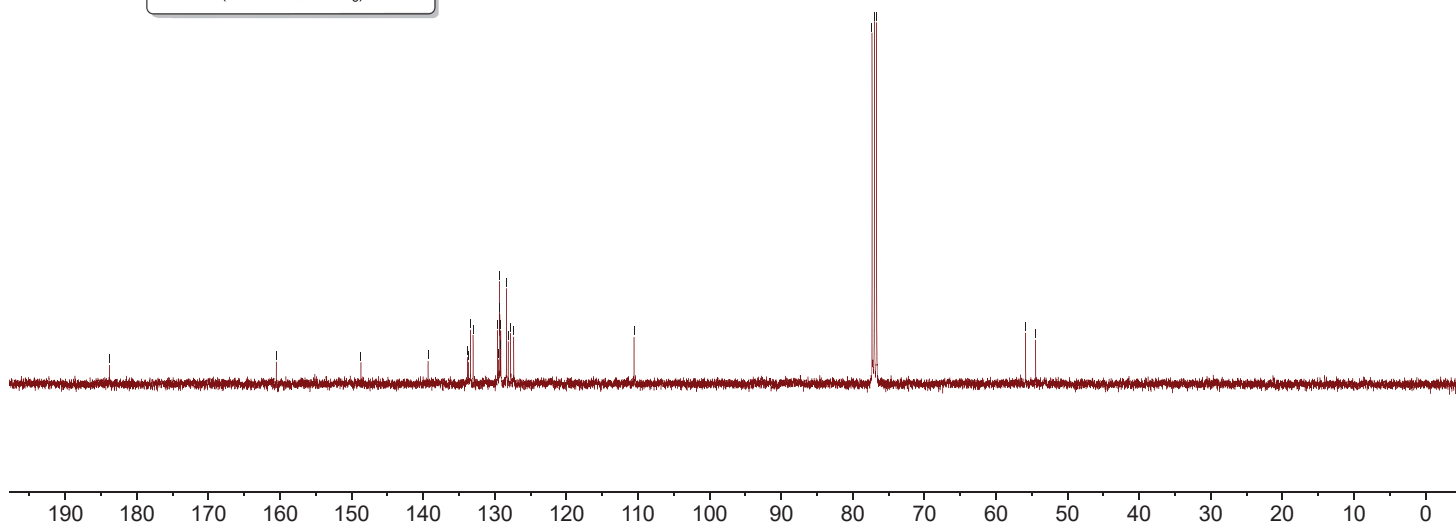



8.56  
8.54  
8.20  
7.94  
7.92  
7.42  
7.40  
7.40  
7.35  
7.33  
7.26

5.62

3.13  
3.11  
3.09

1.63  
1.59  
1.57  
1.56  
1.54  
1.52  
0.89  
0.88  
0.86

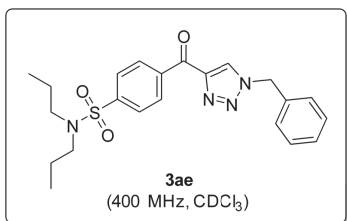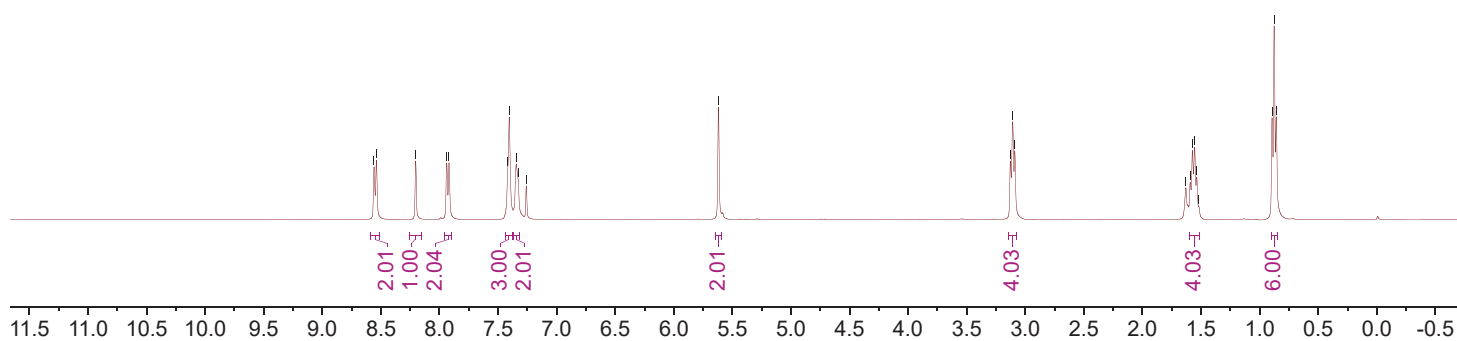

184.26

147.90  
144.04  
139.17  
133.45  
131.18  
129.39  
129.29  
128.54  
128.40  
126.90

77.32  
77.00  
76.68

54.58  
50.08

22.03

11.14

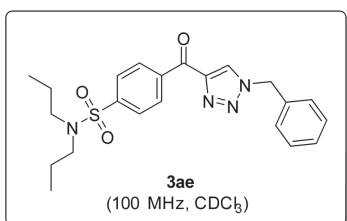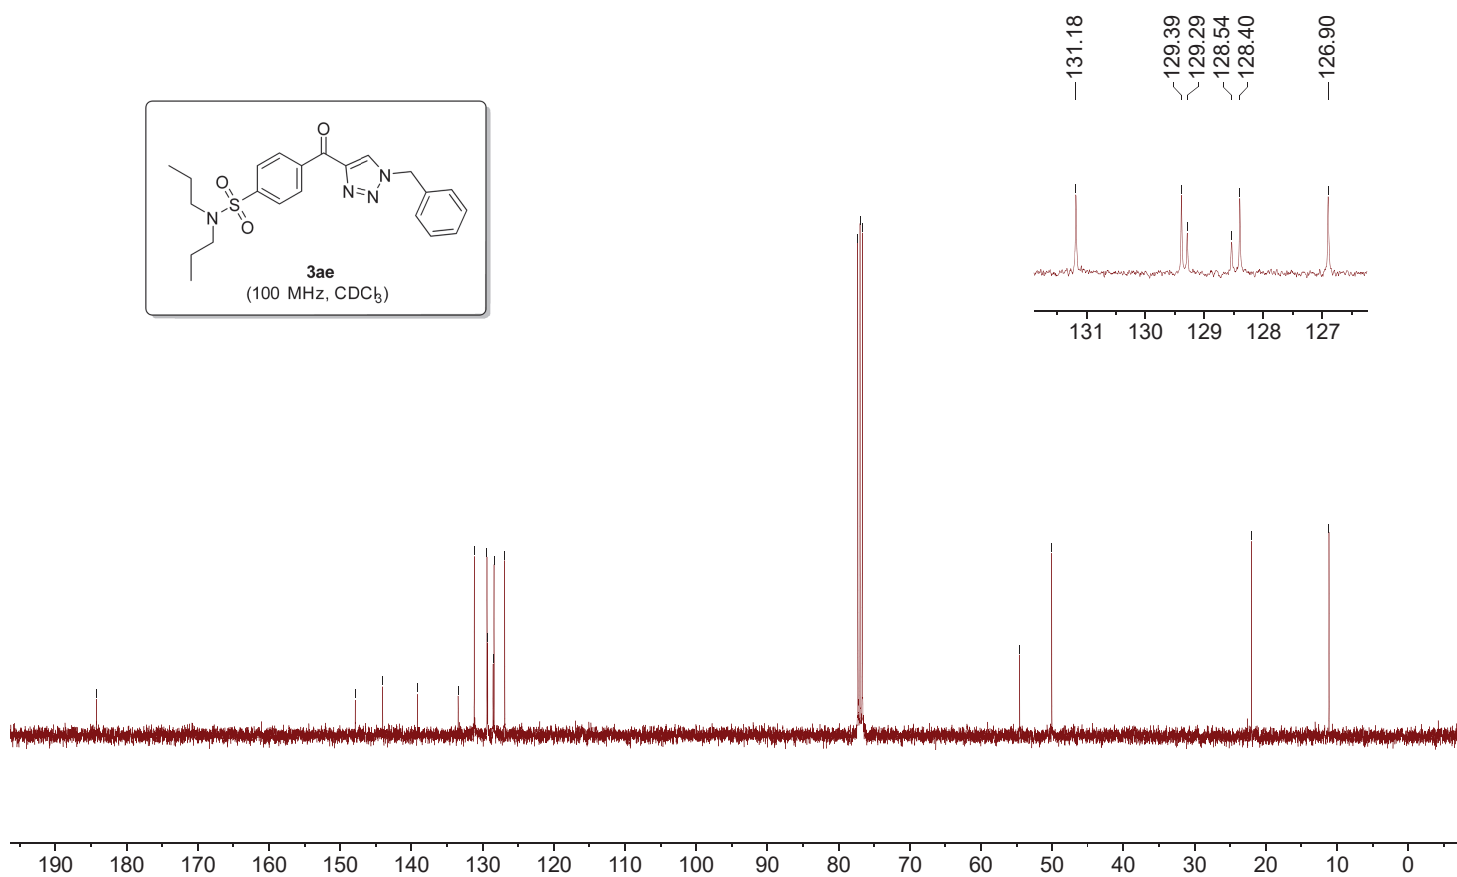

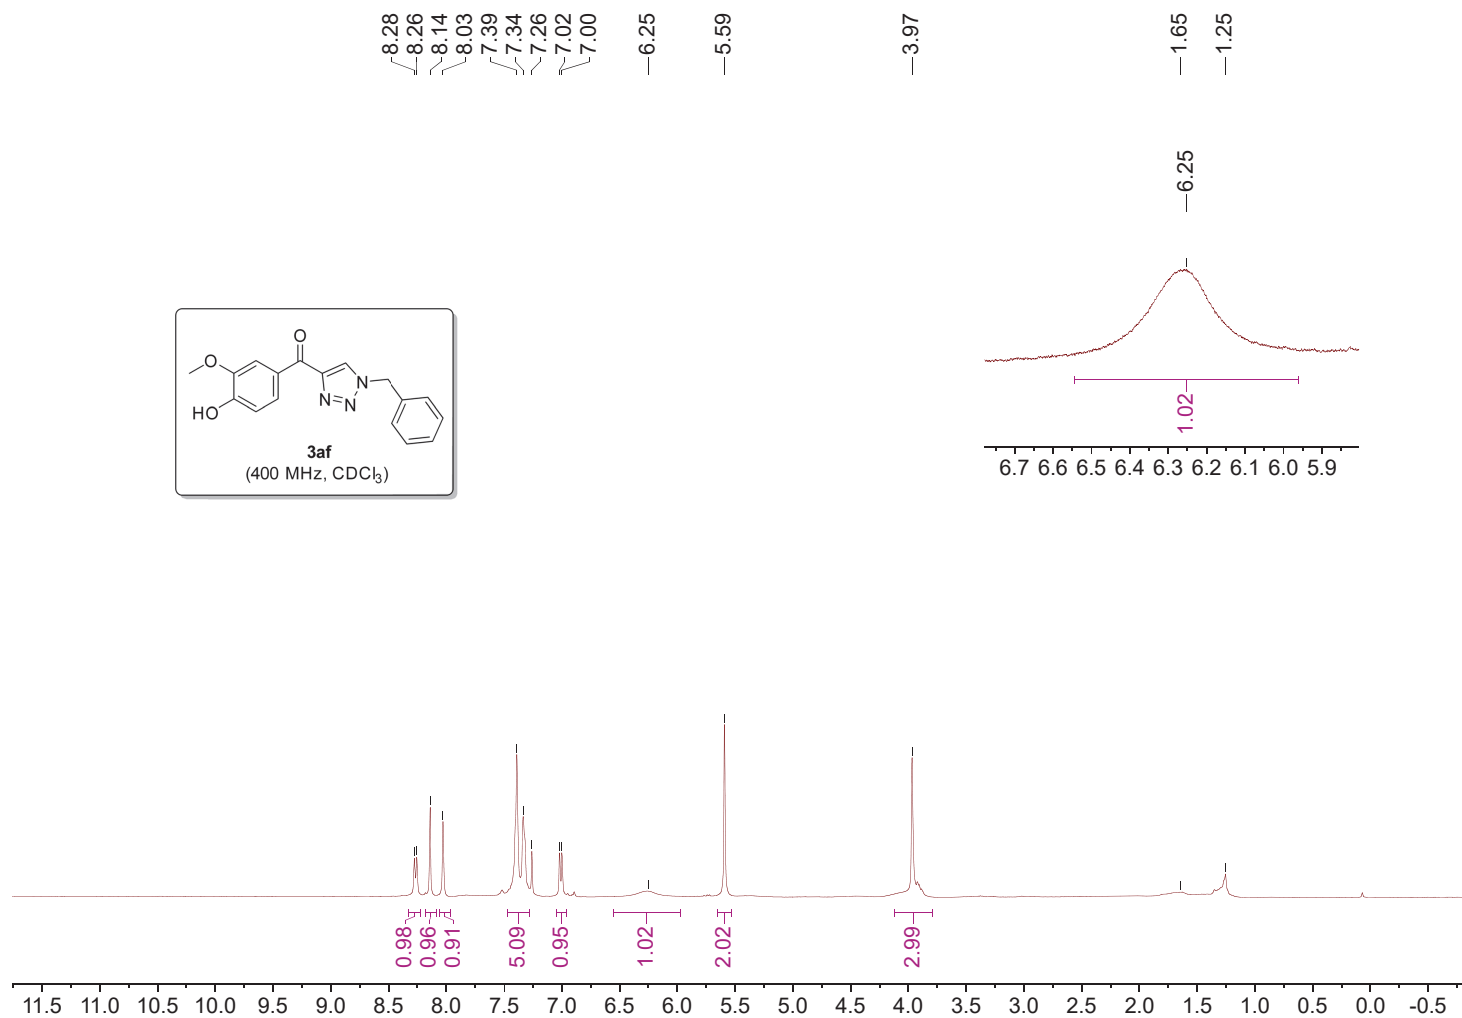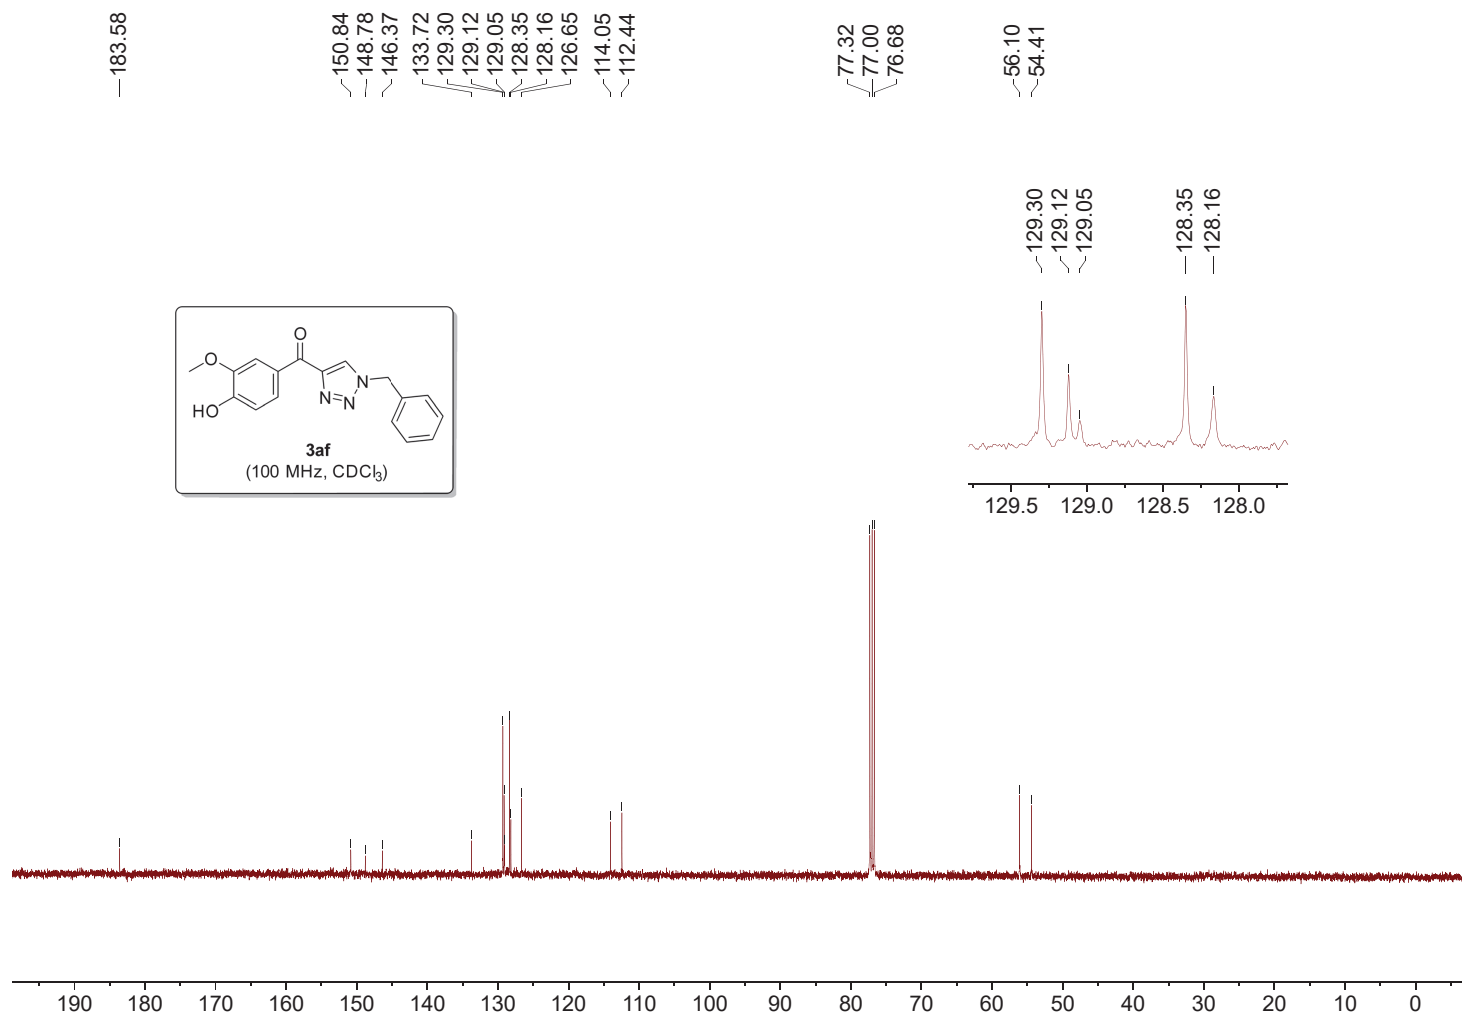

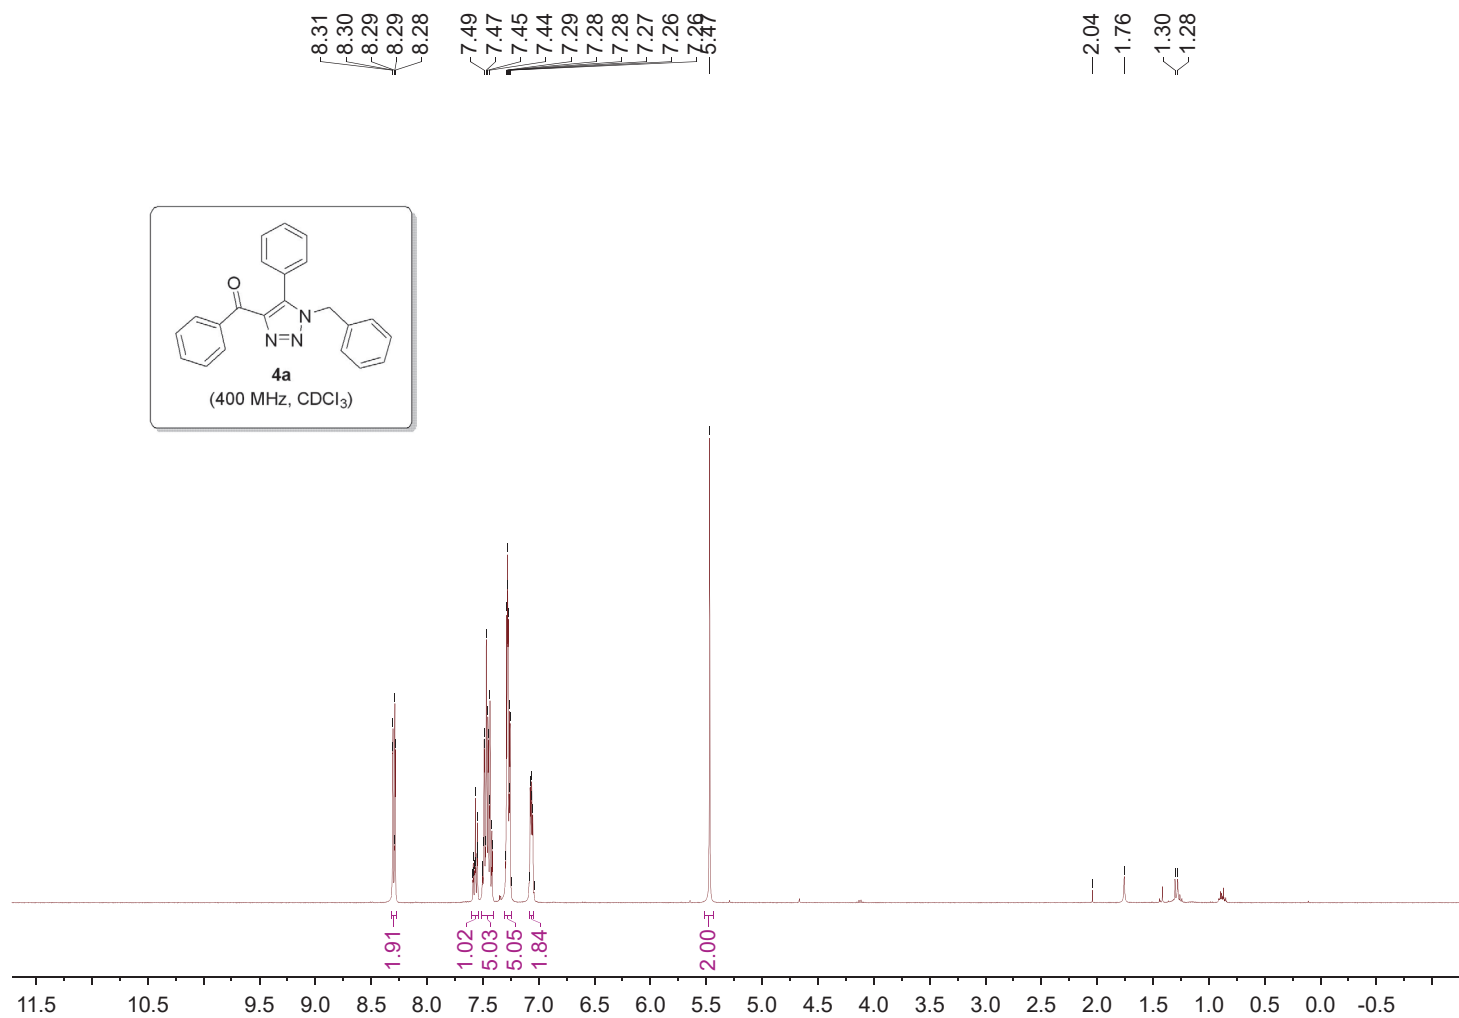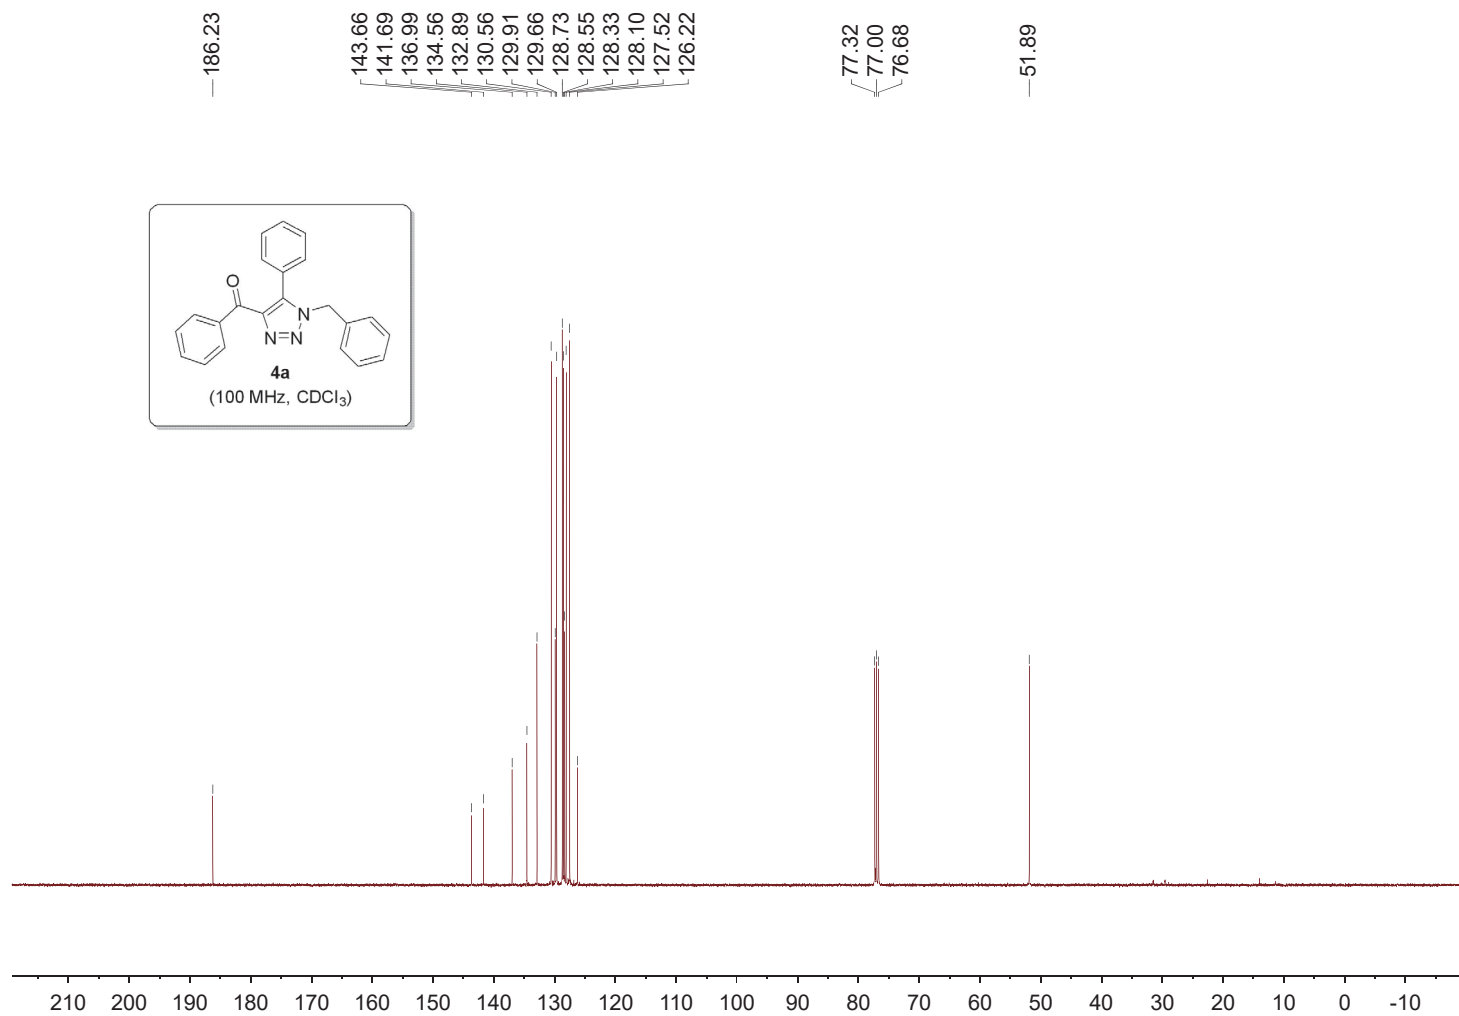

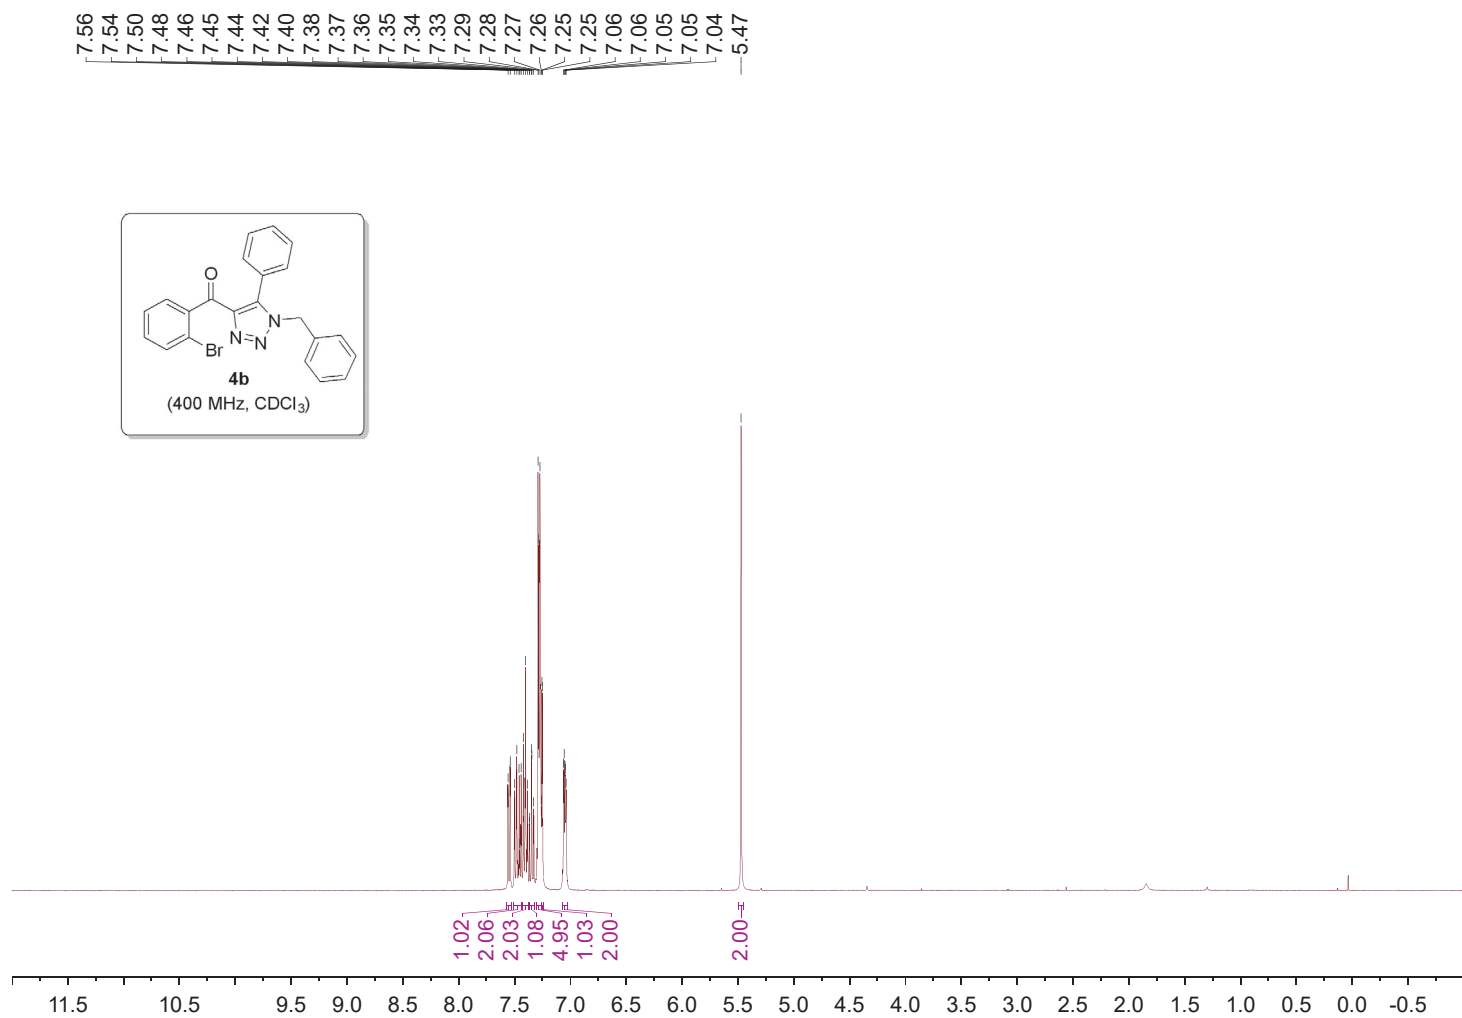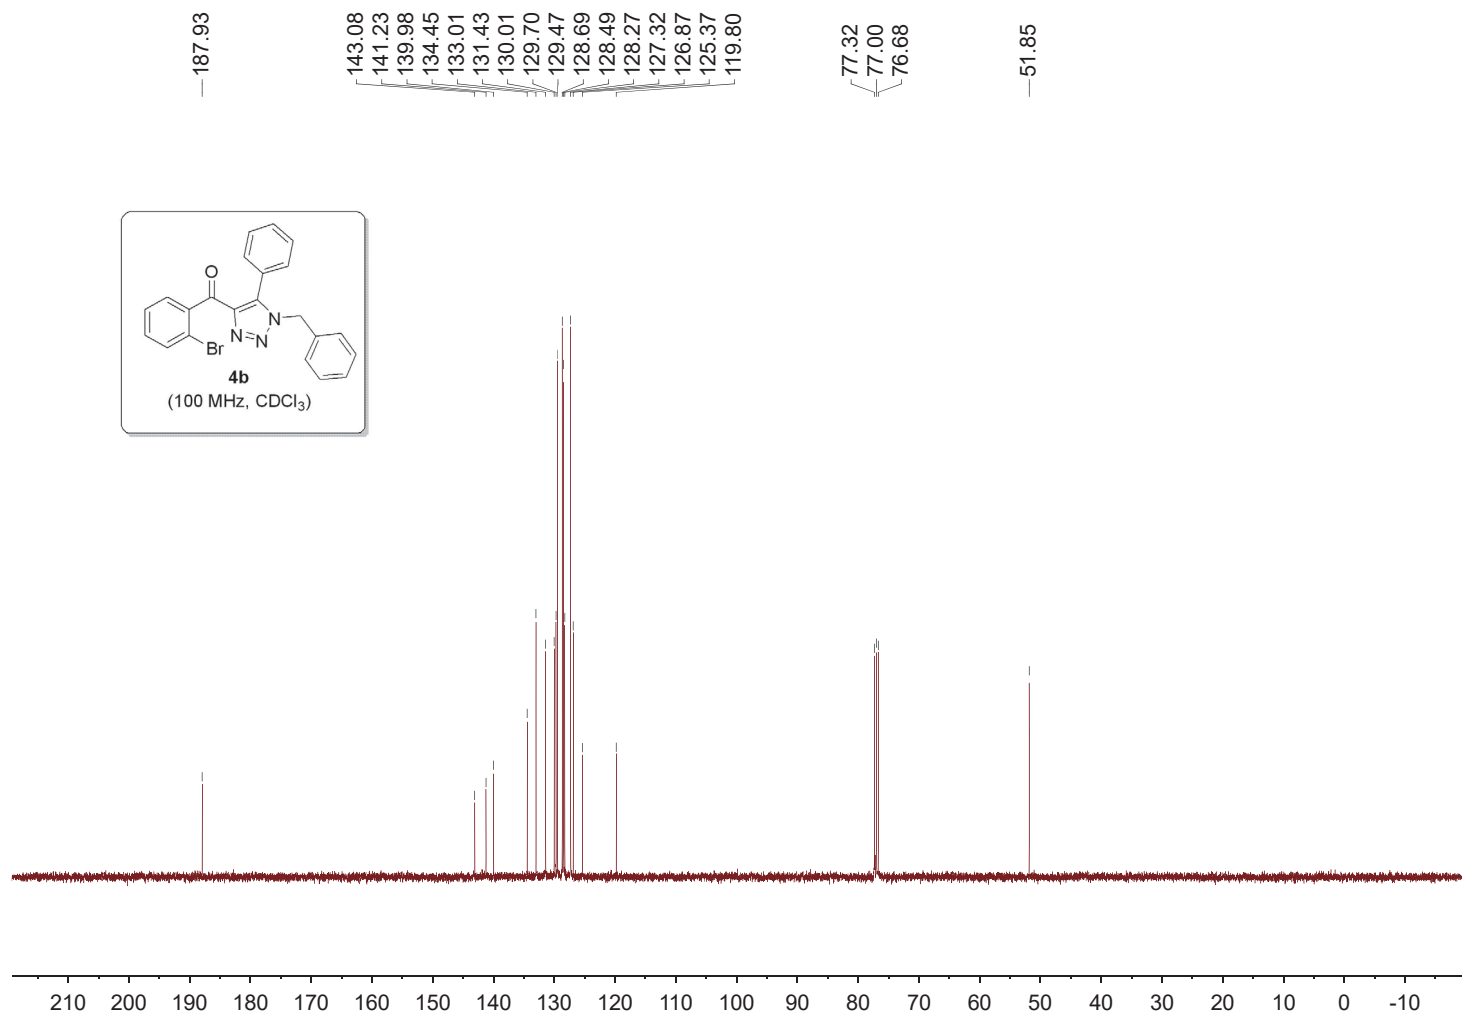

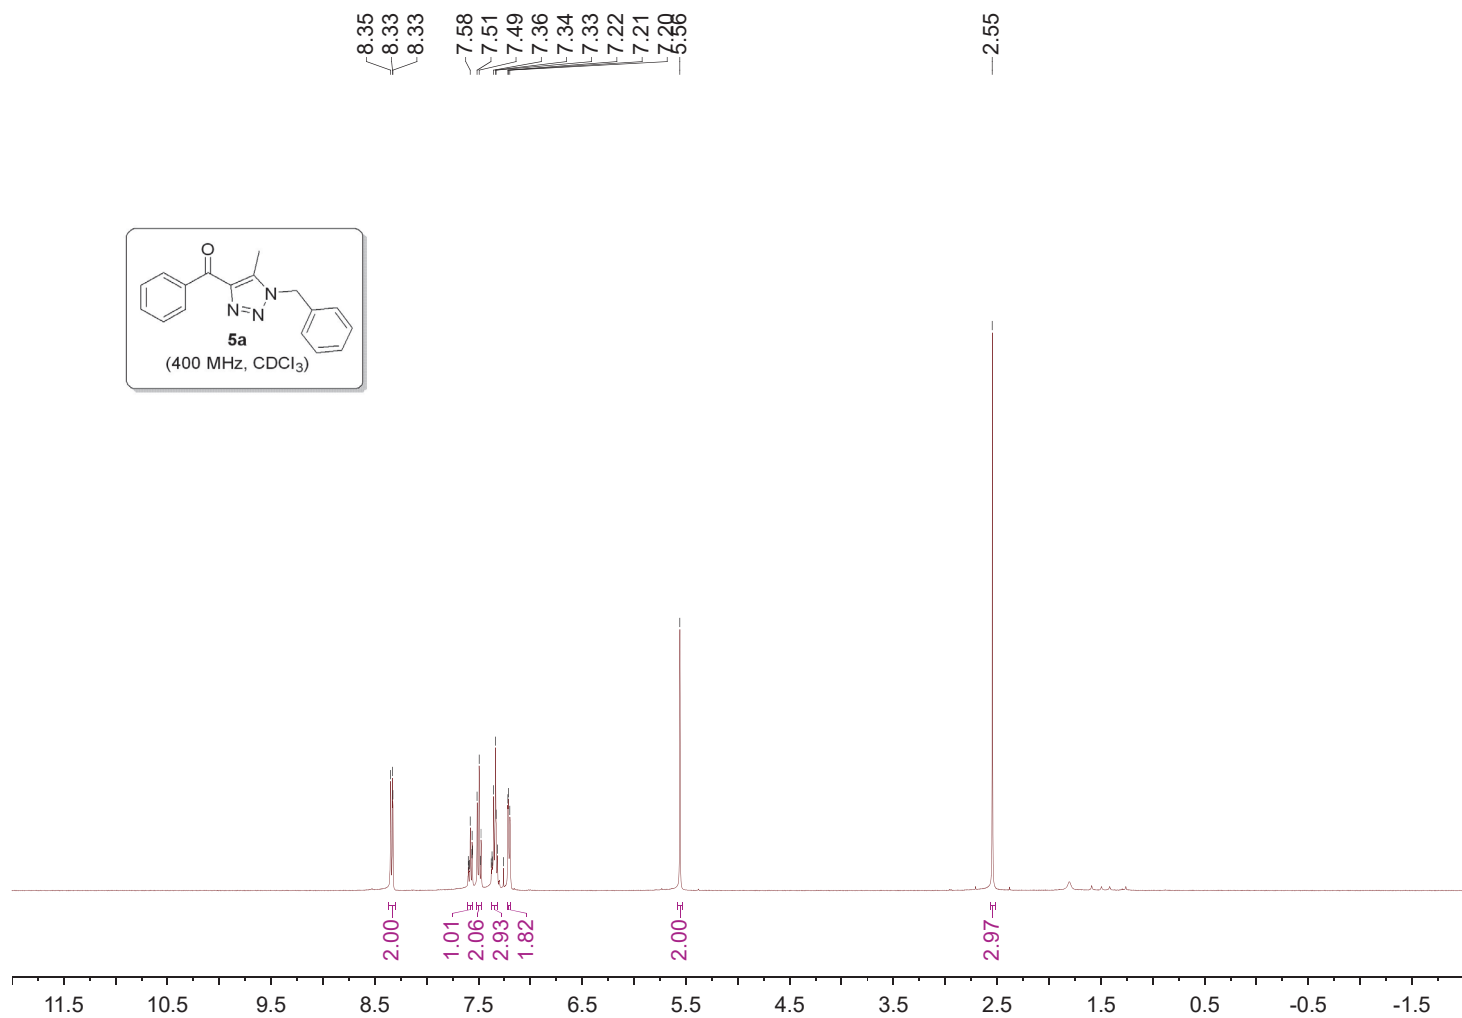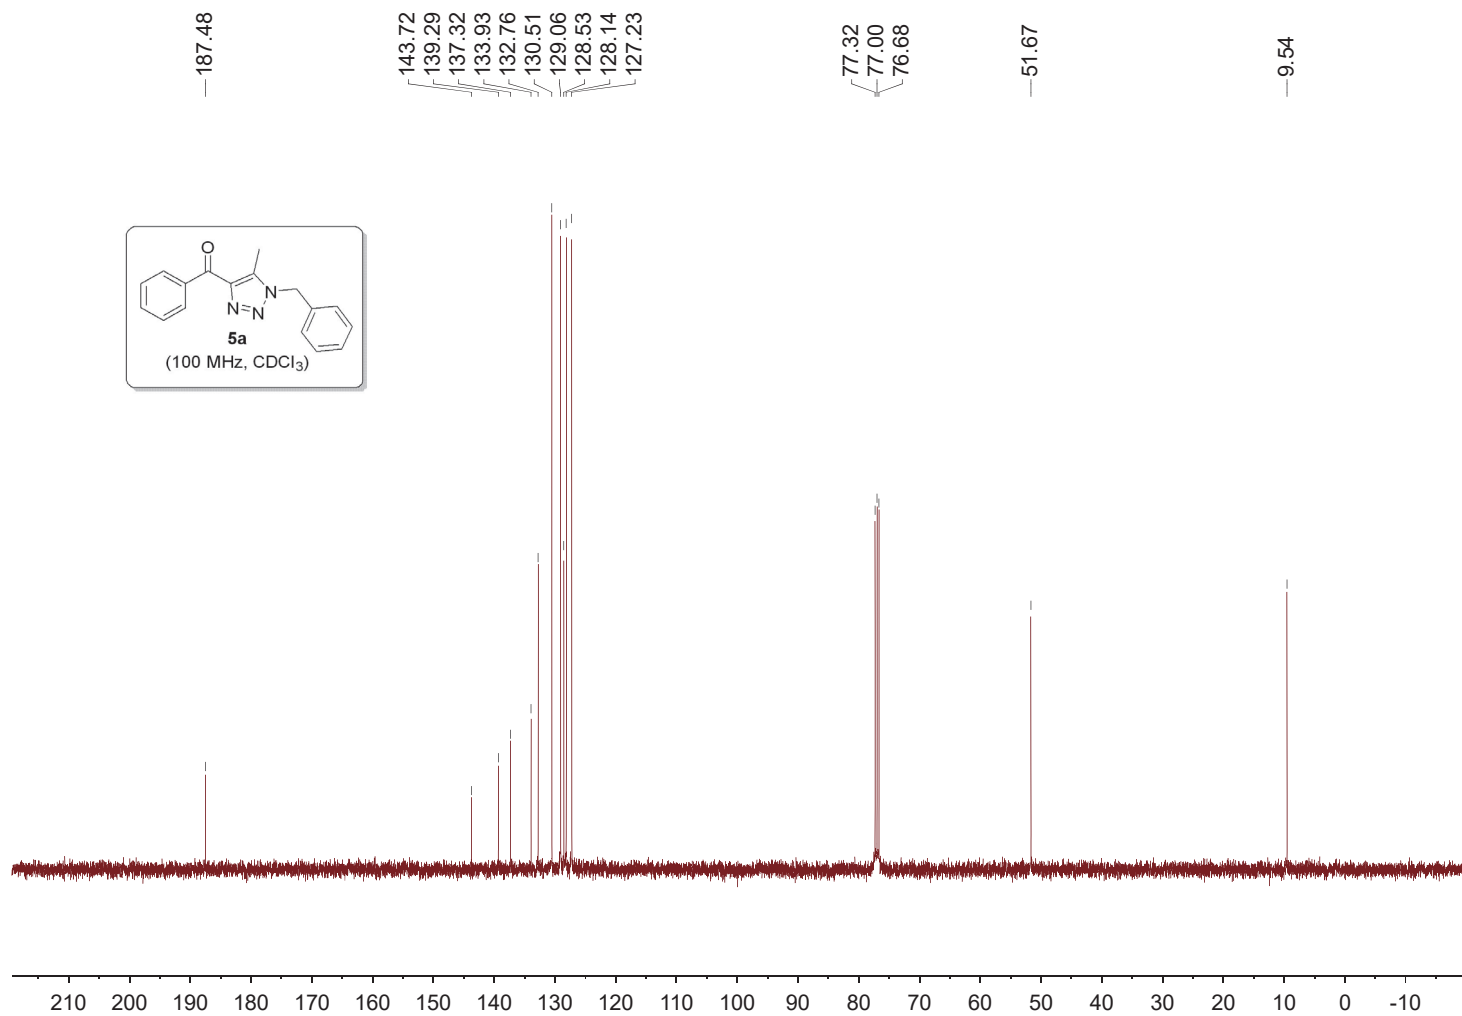

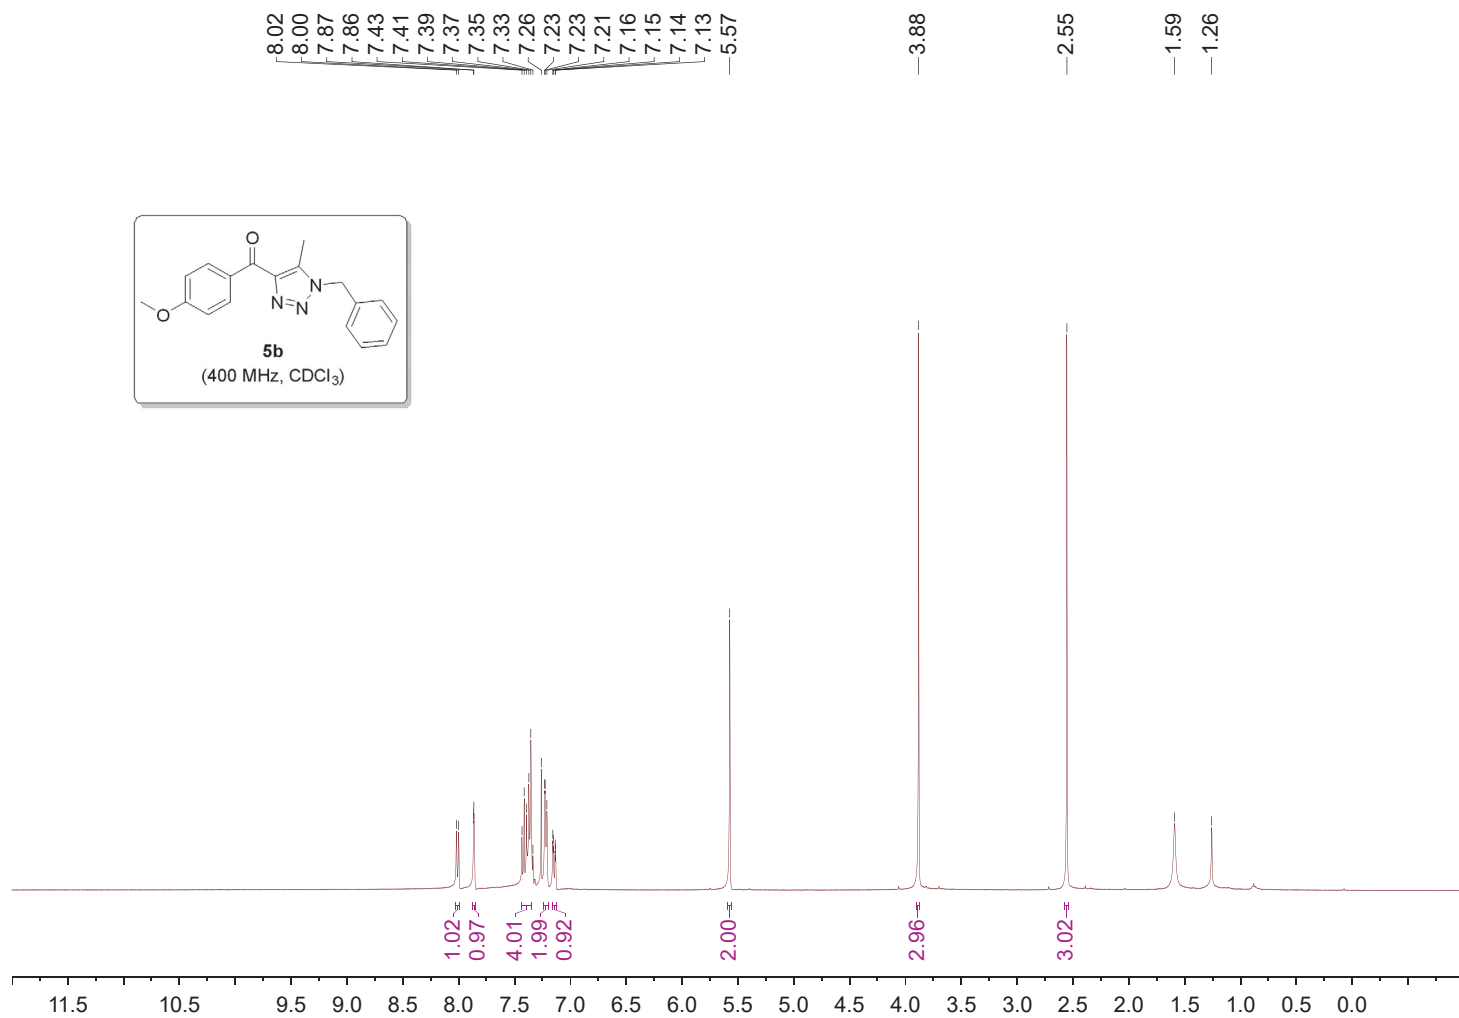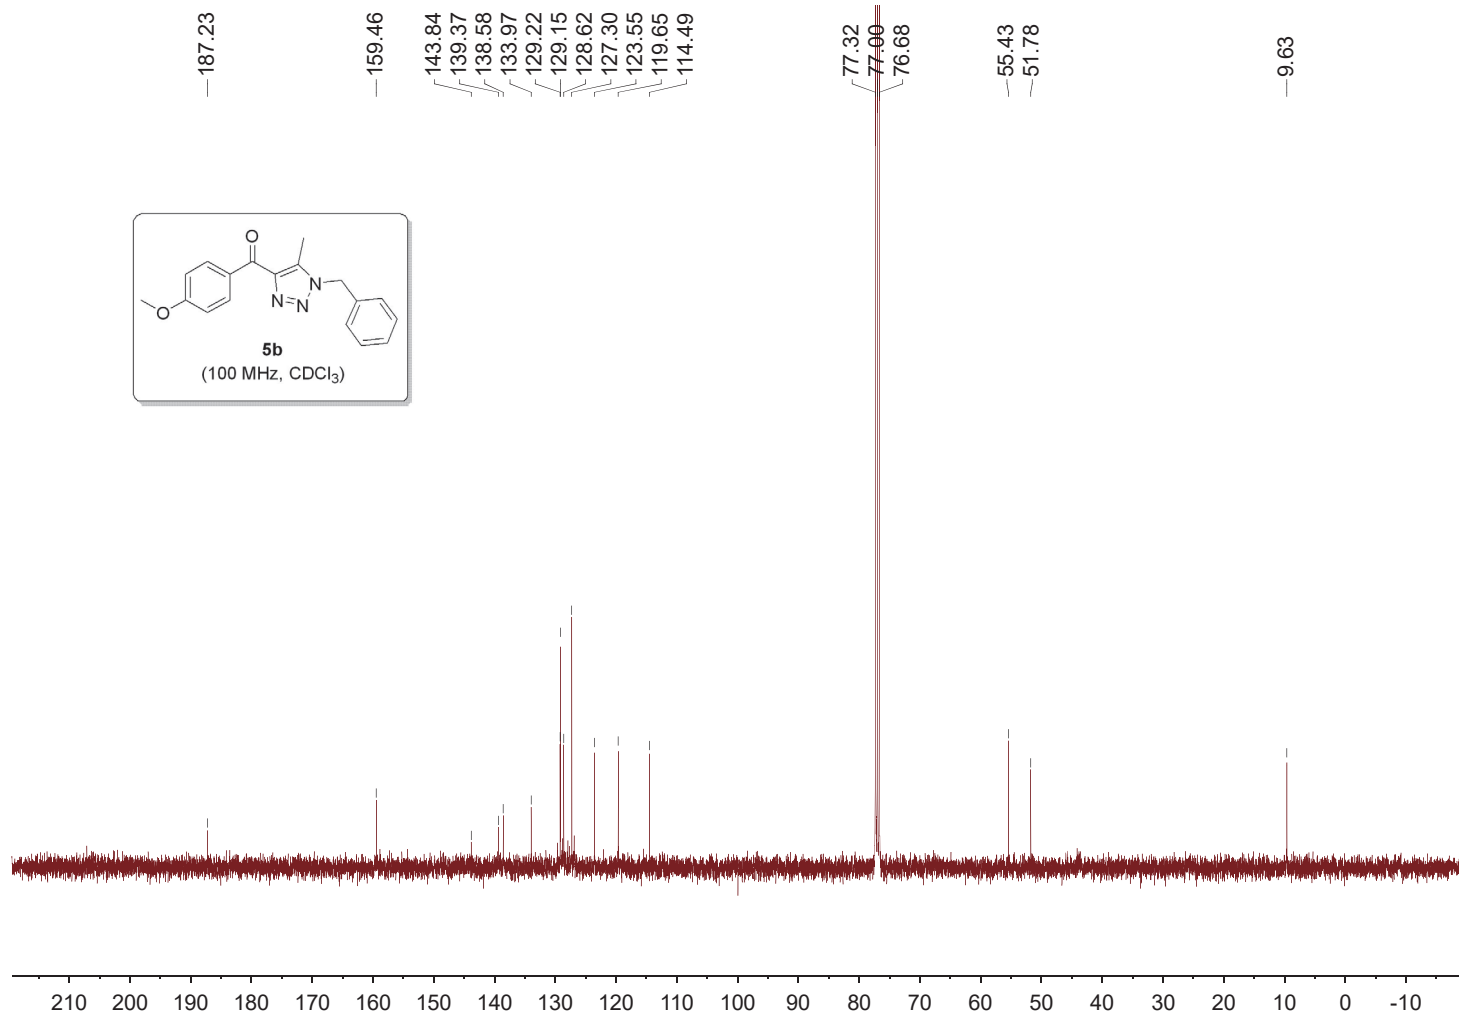

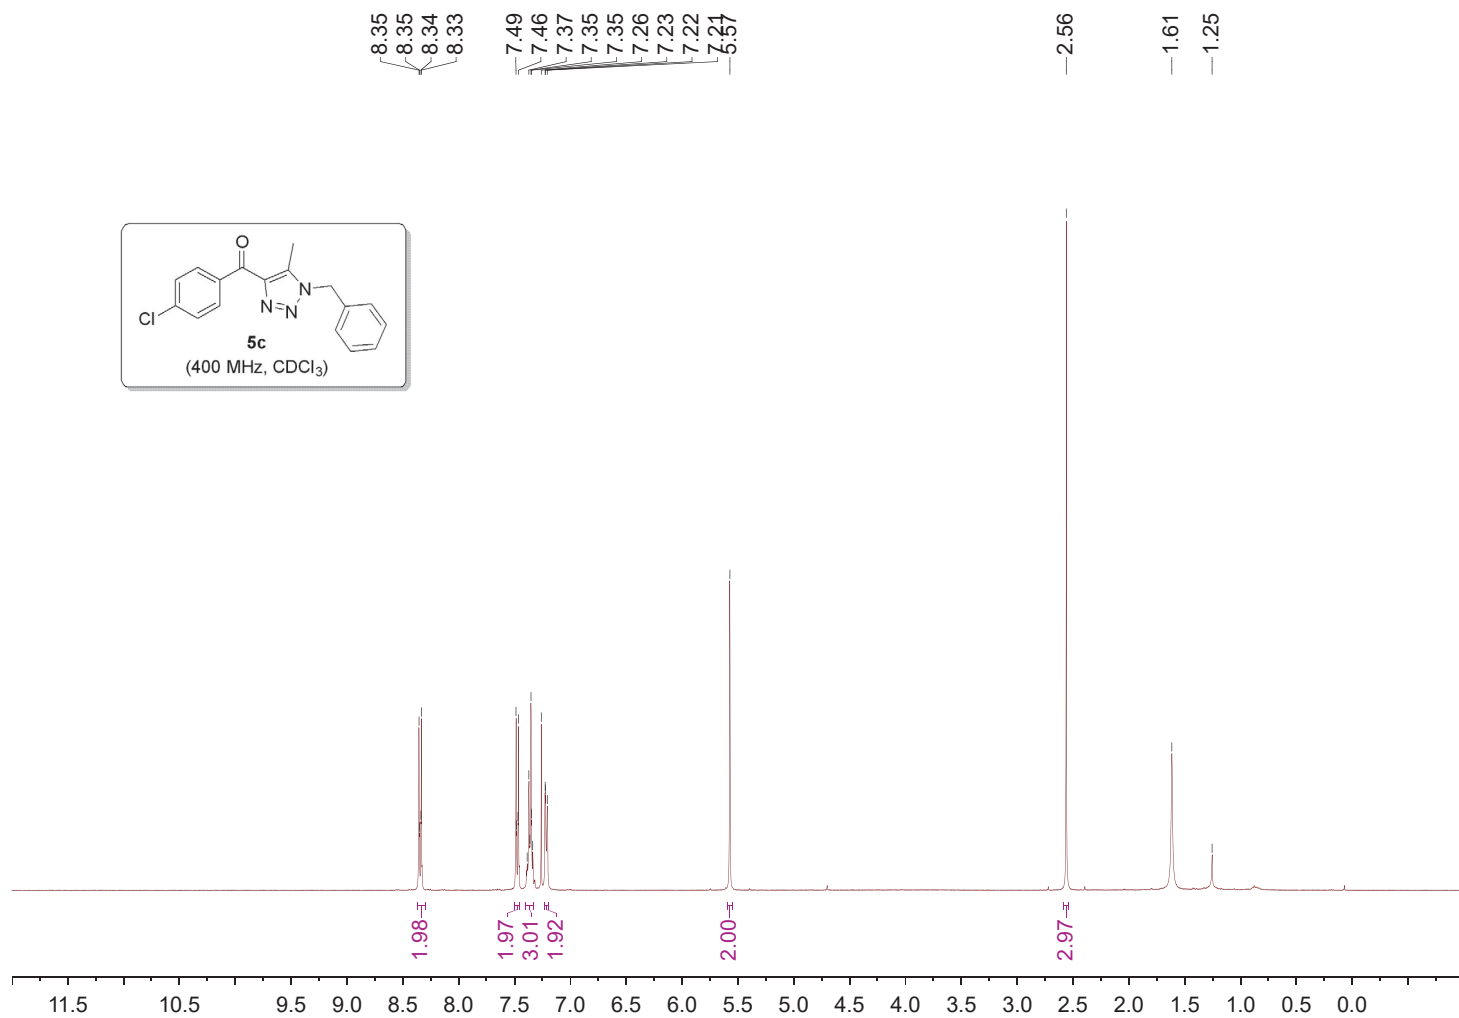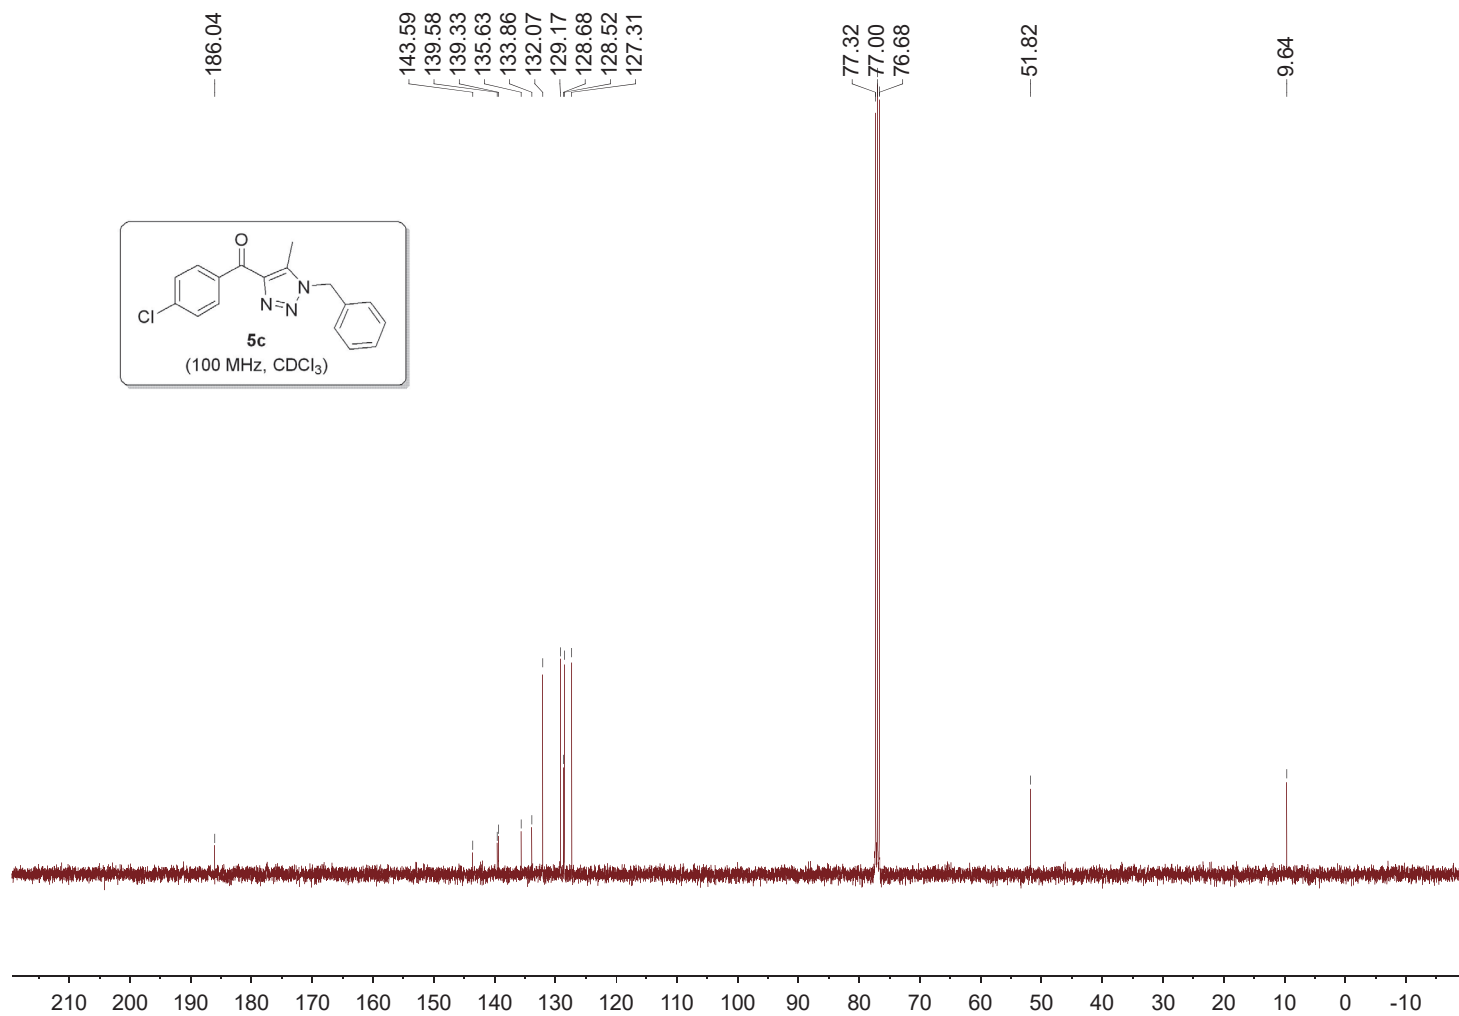

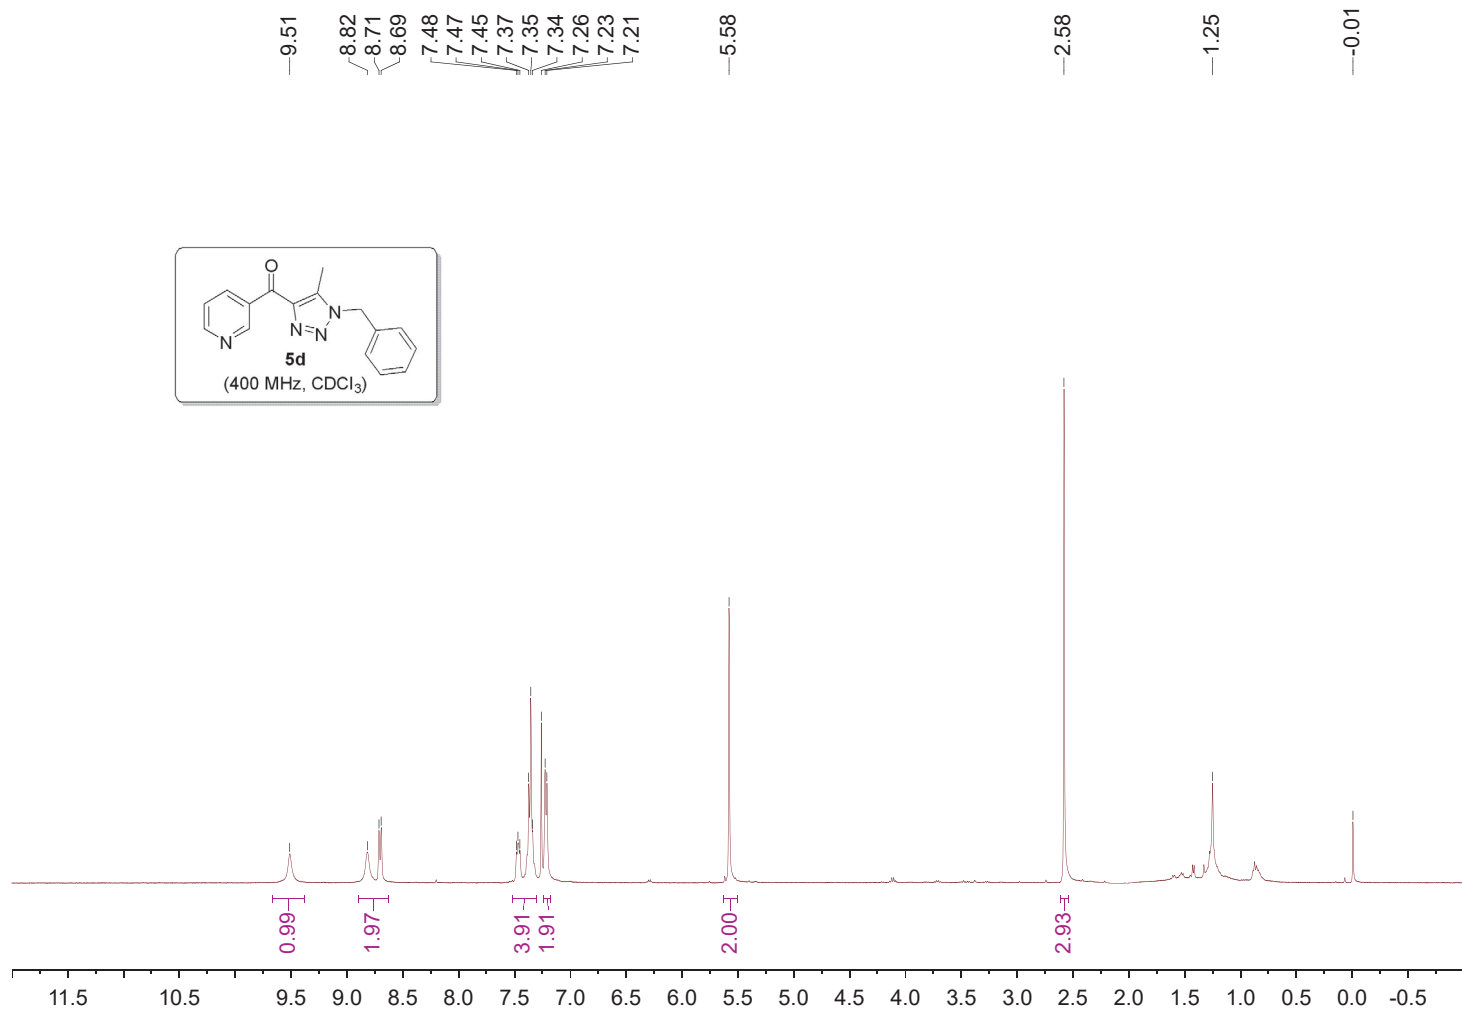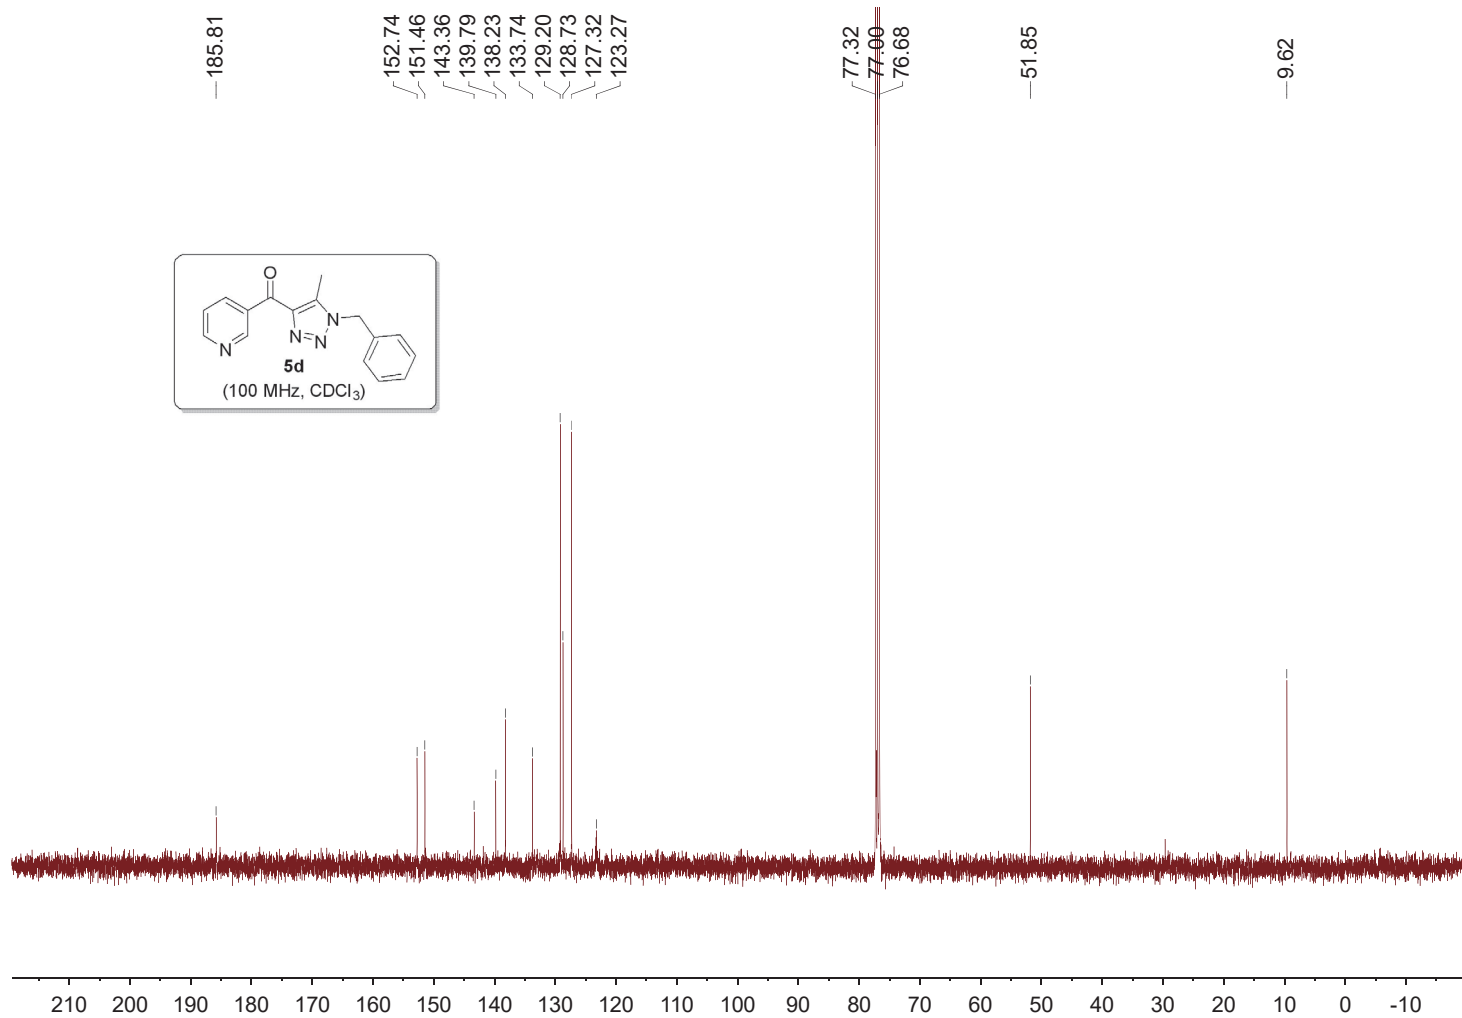



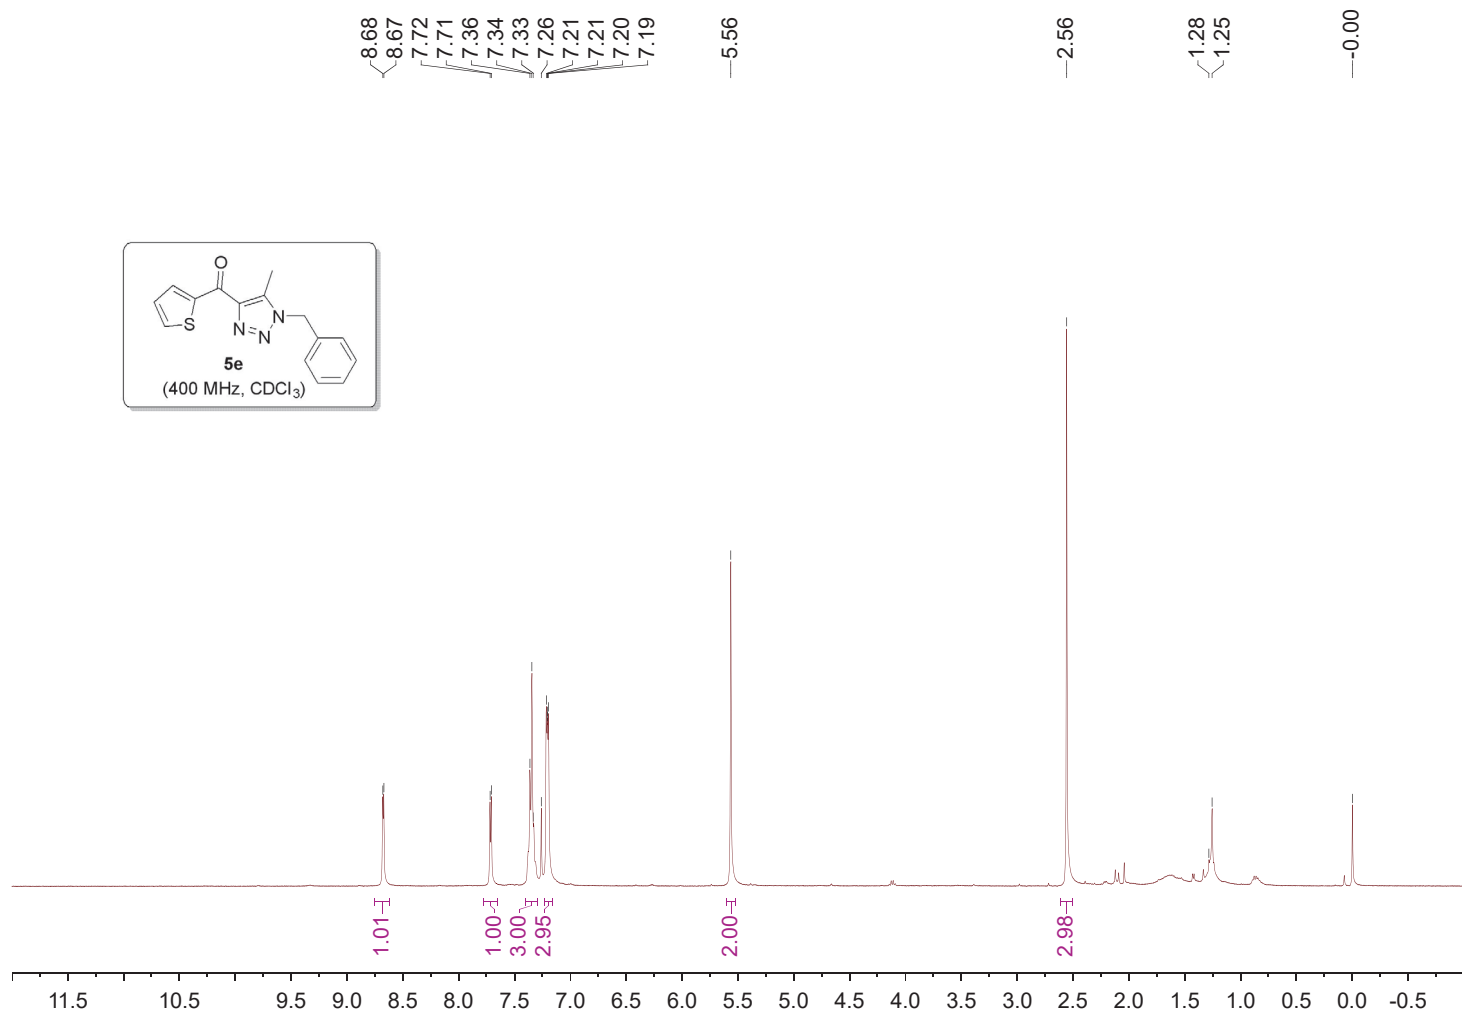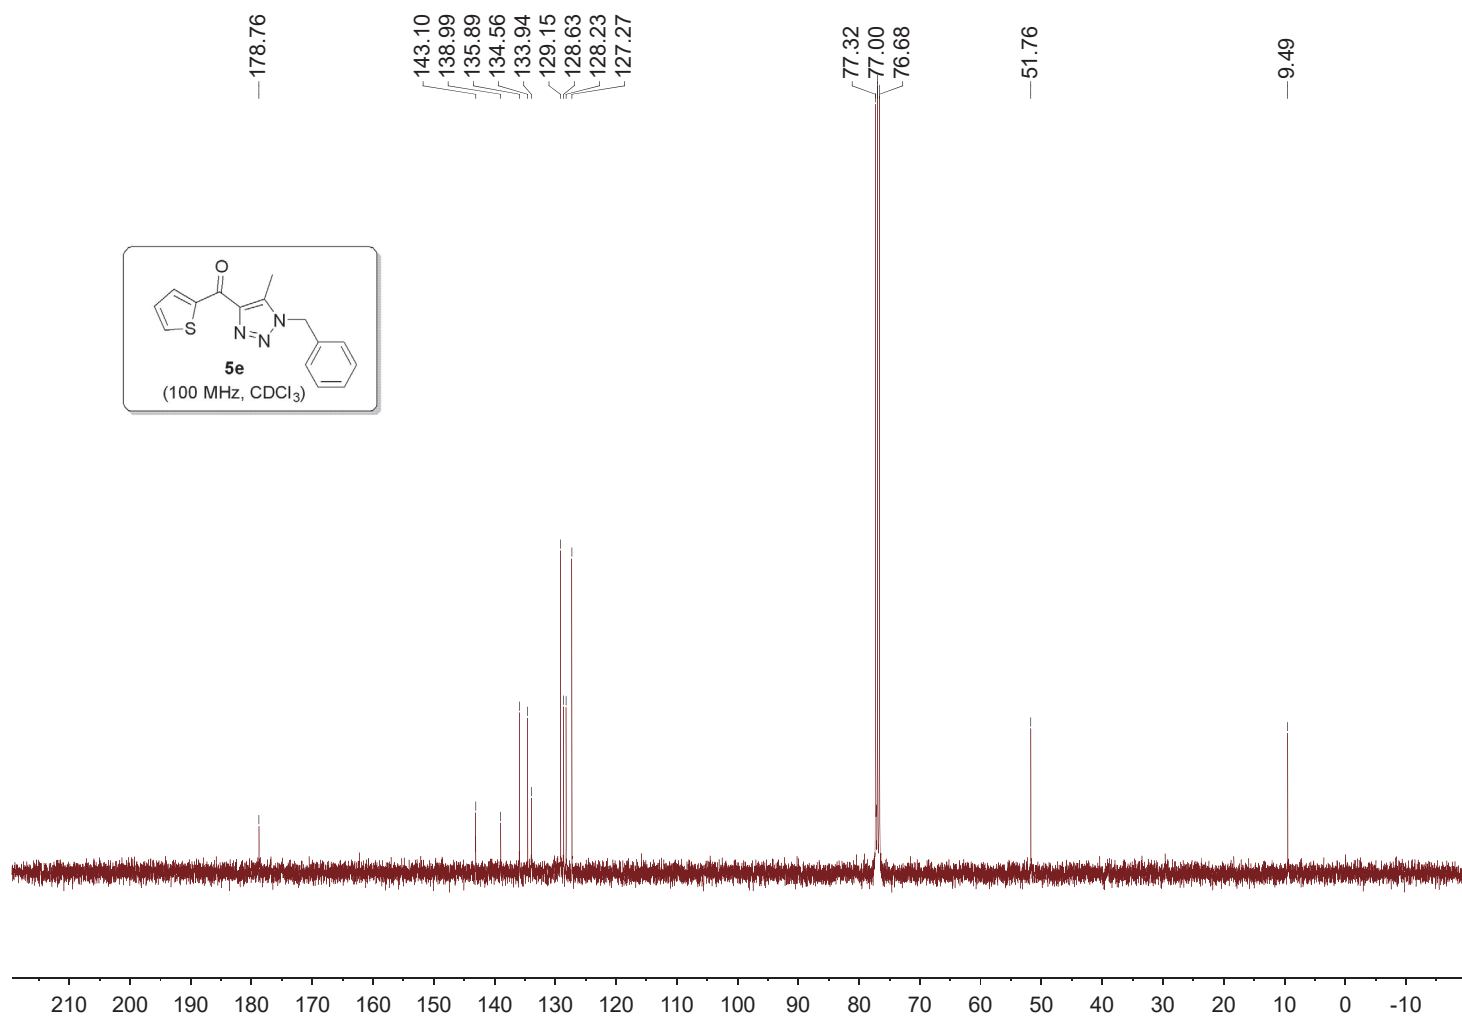

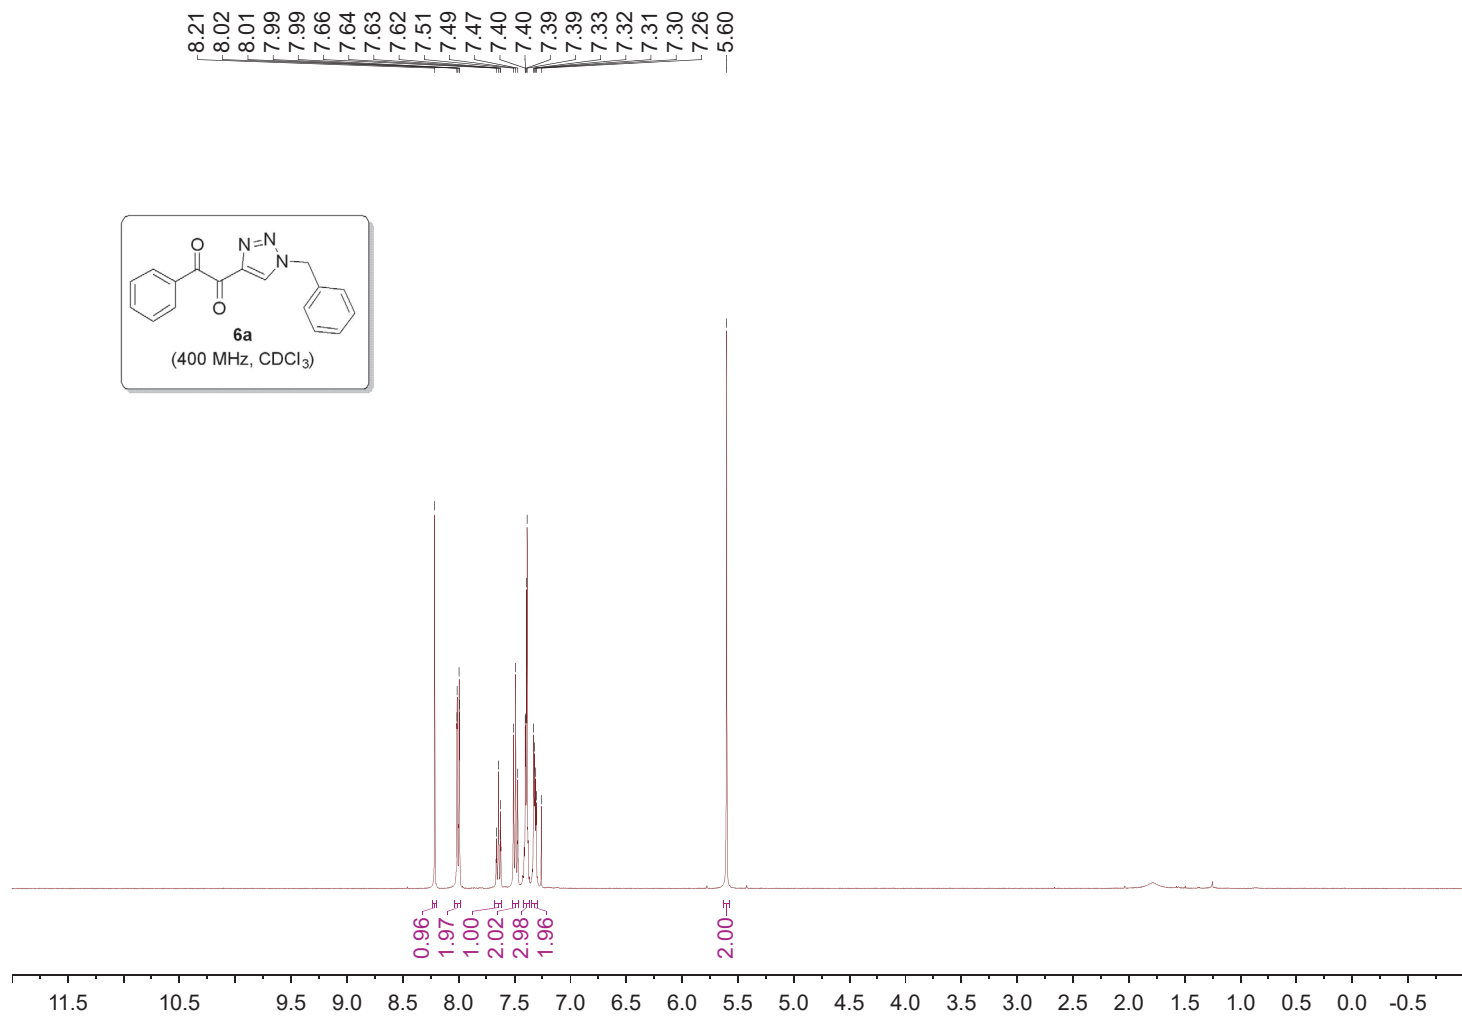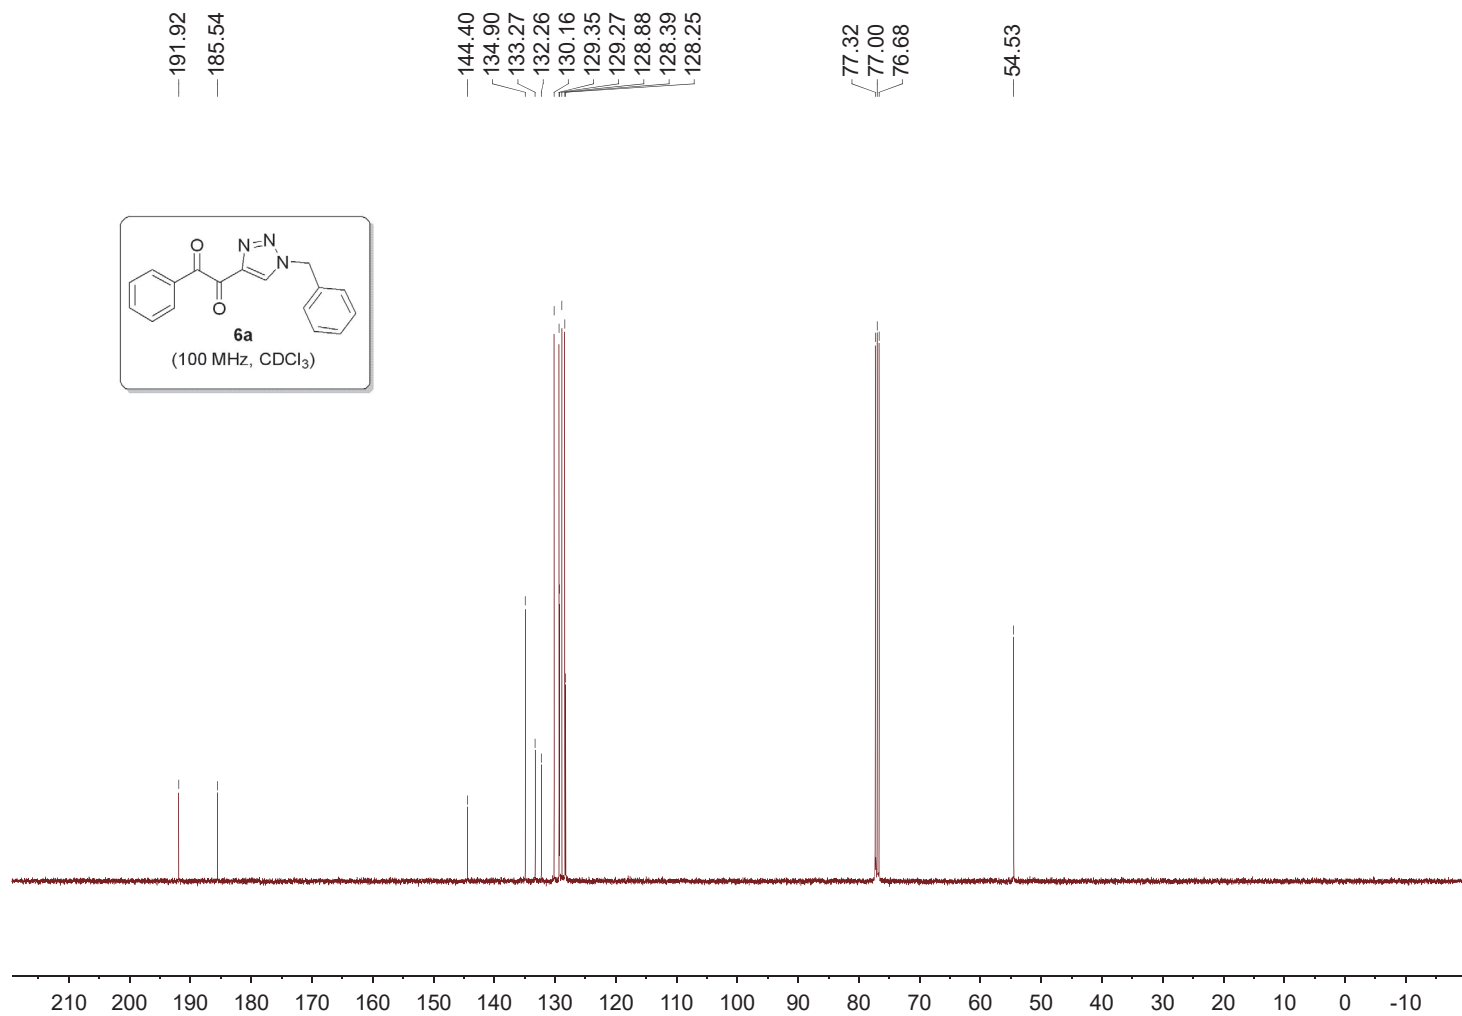

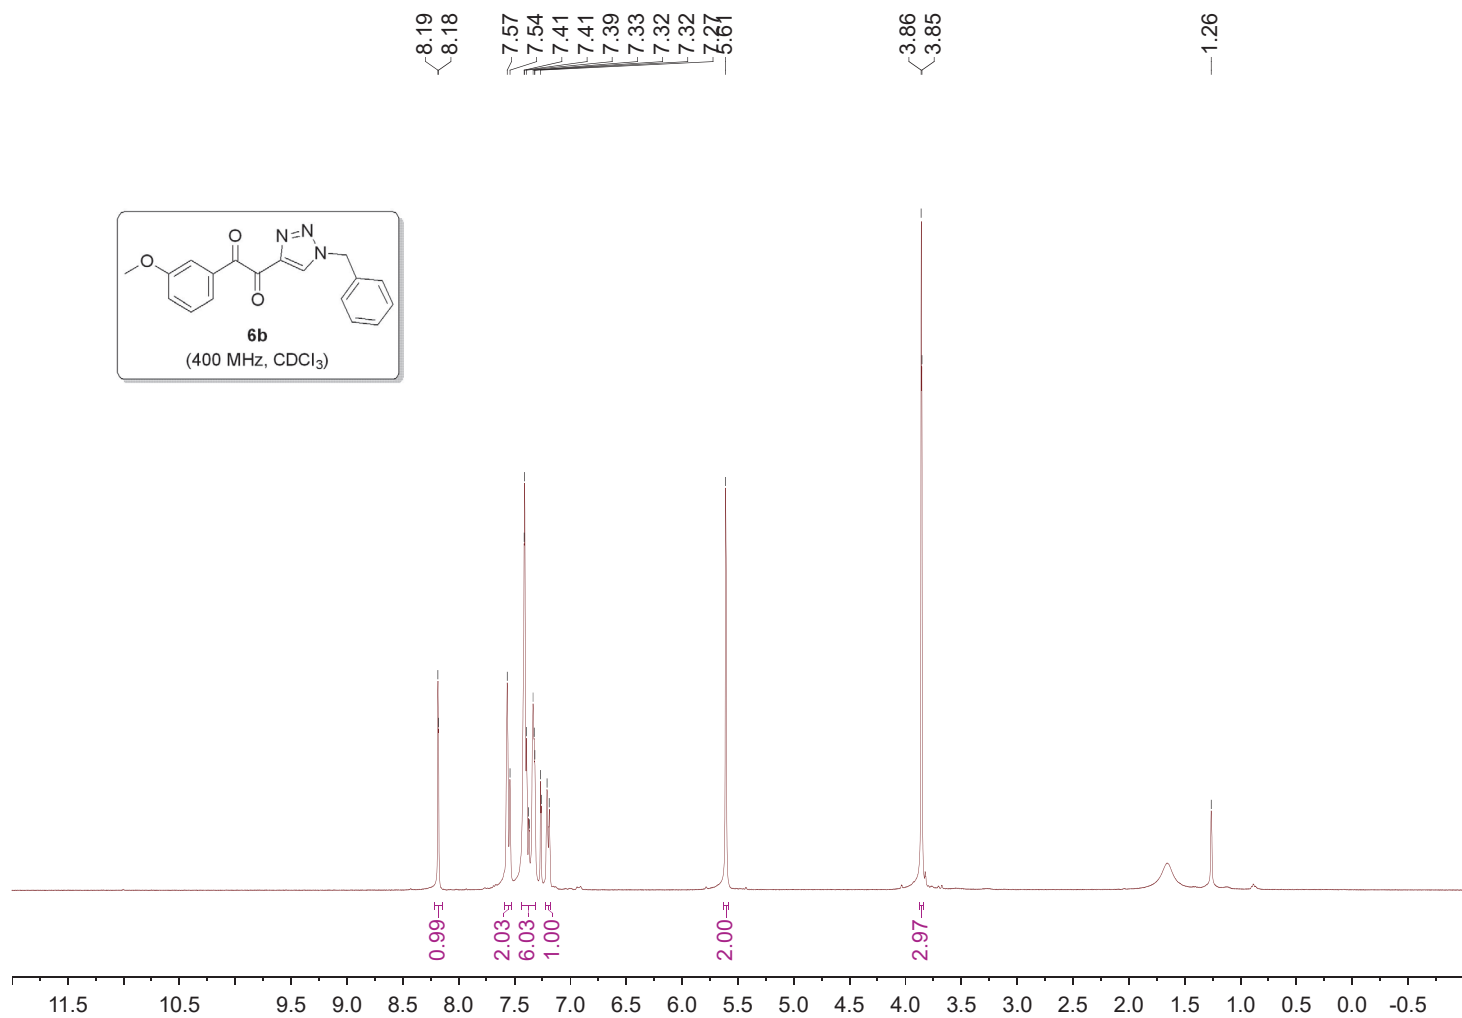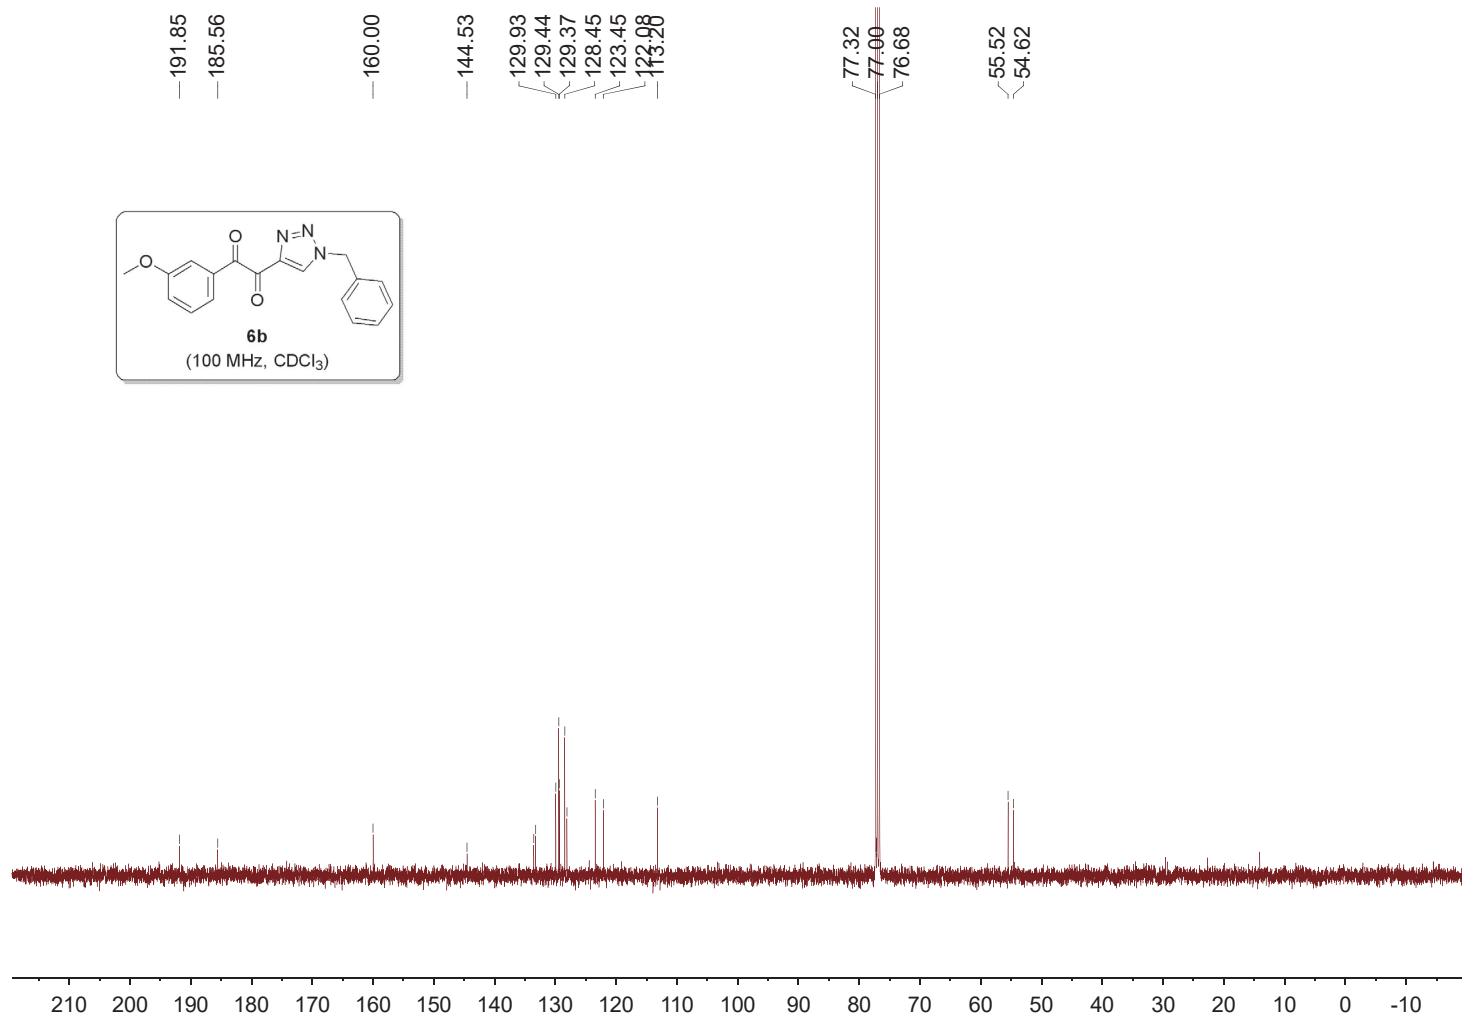

8.31  
8.06  
8.04  
7.39  
7.34  
7.19  
7.17  
7.15  
—5.63

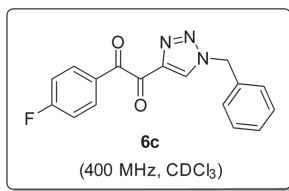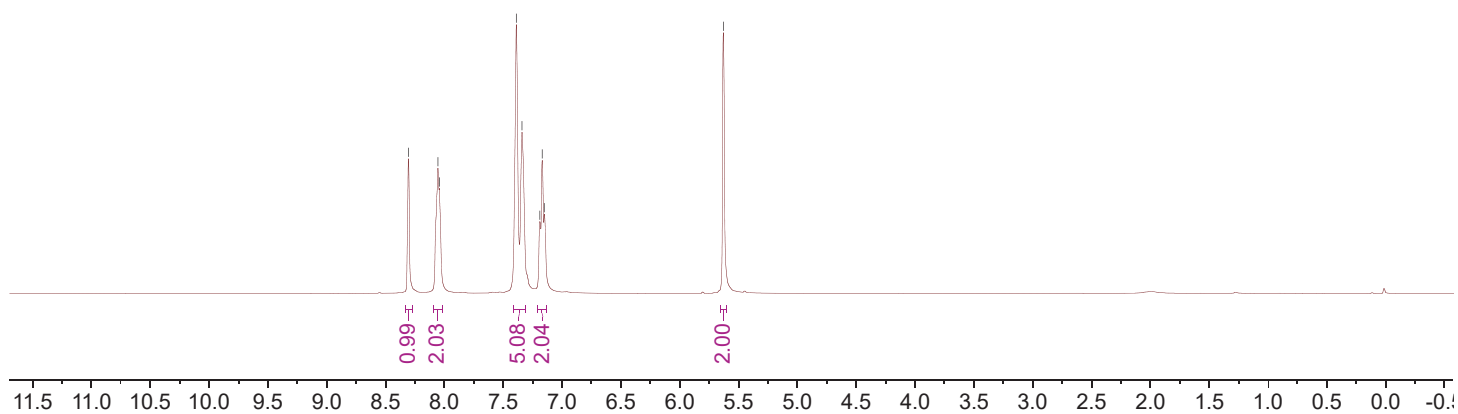

190.12  
185.08  
167.93  
165.36  
144.11  
133.27  
132.98  
132.88  
129.21  
129.11  
128.65  
128.48  
128.30  
116.28  
116.06  
77.32  
77.00  
76.68  
—54.40

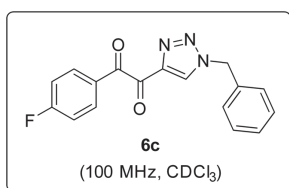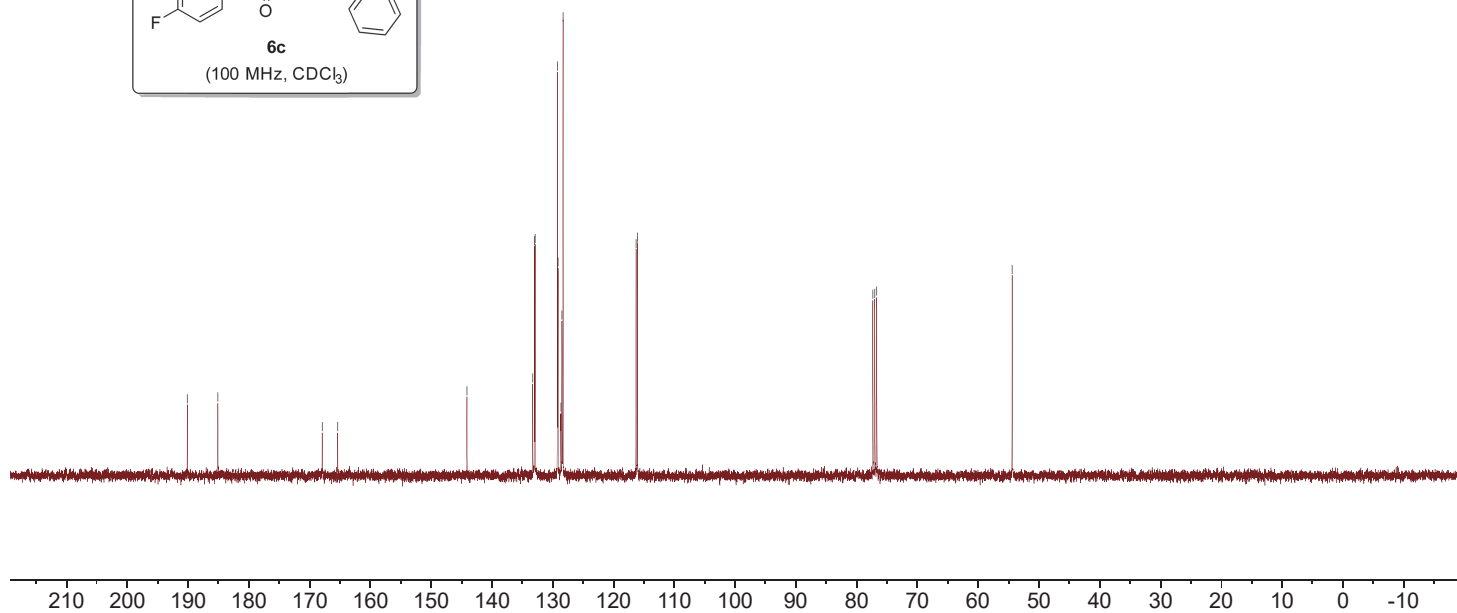

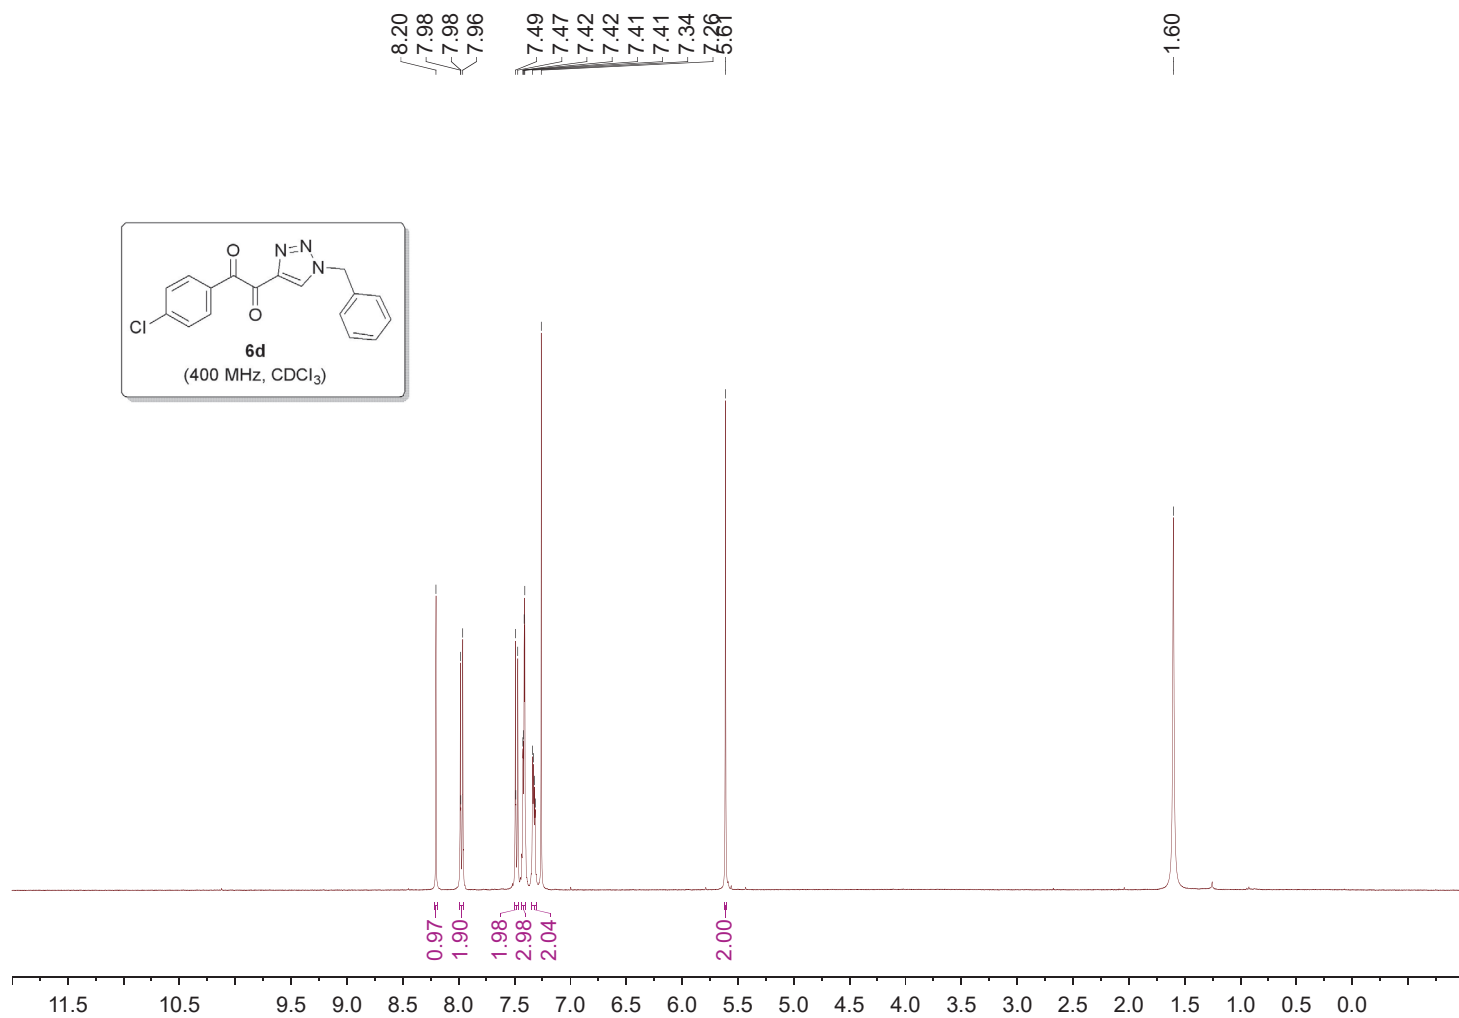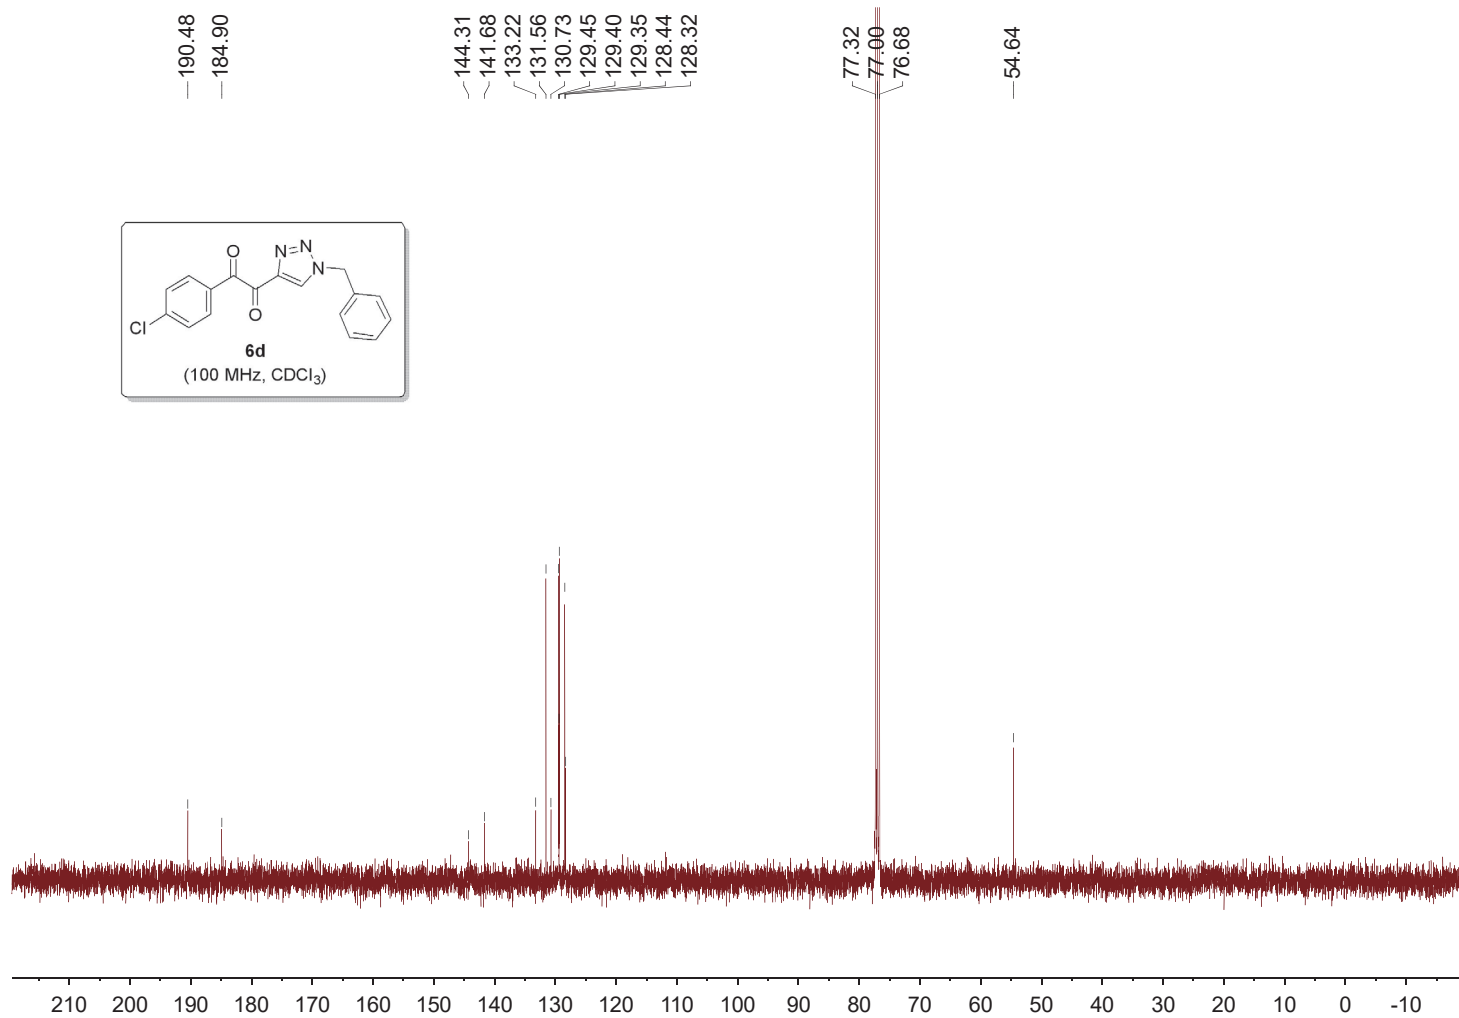

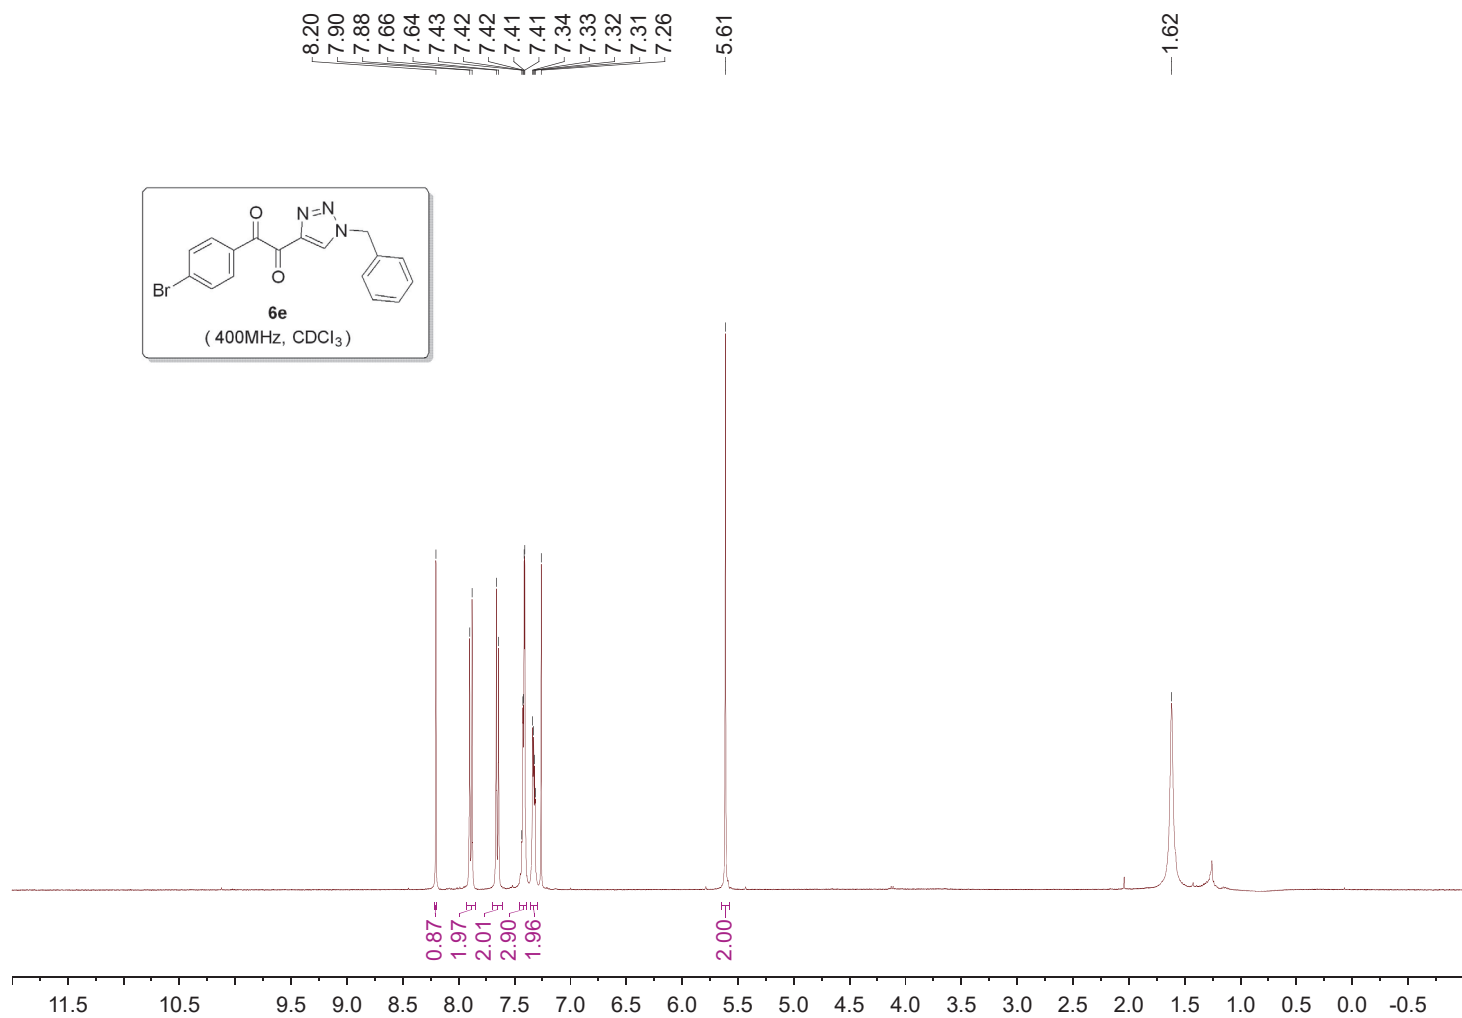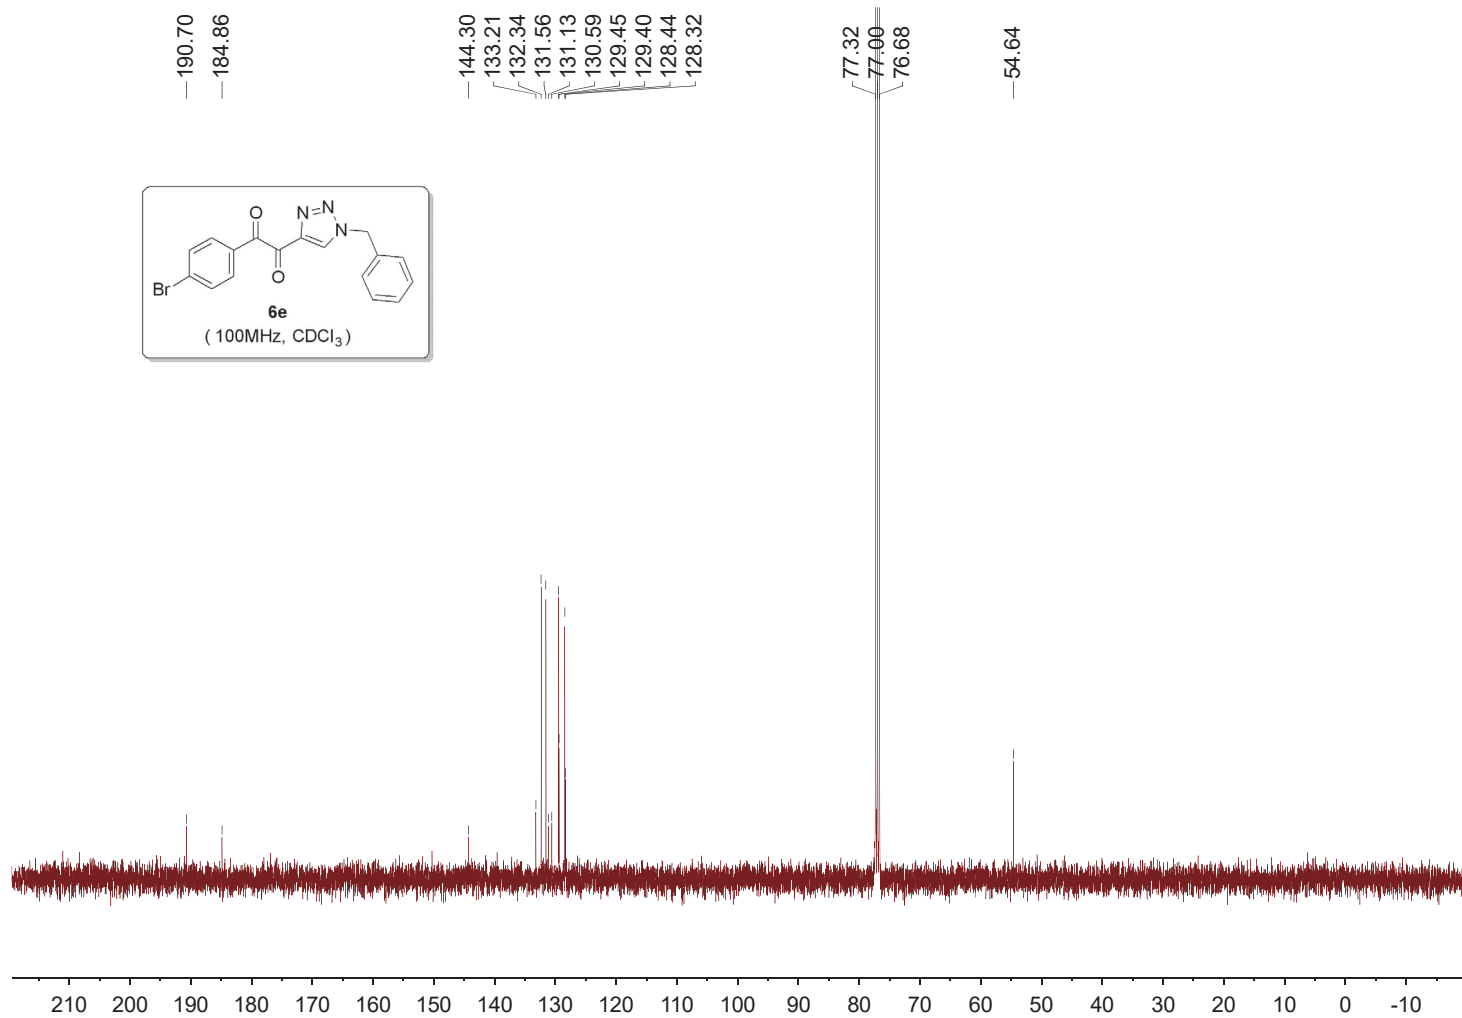

8.74  
8.09  
8.09  
8.08  
8.07  
8.07  
7.79  
7.79  
7.78  
7.77  
7.77  
7.70  
7.70  
7.68  
7.66  
7.66  
7.60  
7.60  
7.59  
7.58  
7.57  
7.56  
7.56  
7.55  
7.54  
7.53  
7.53  
7.52  
7.51  
7.50  
7.50  
7.26  
1.64

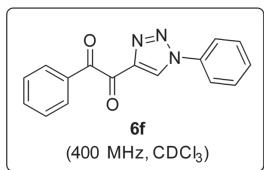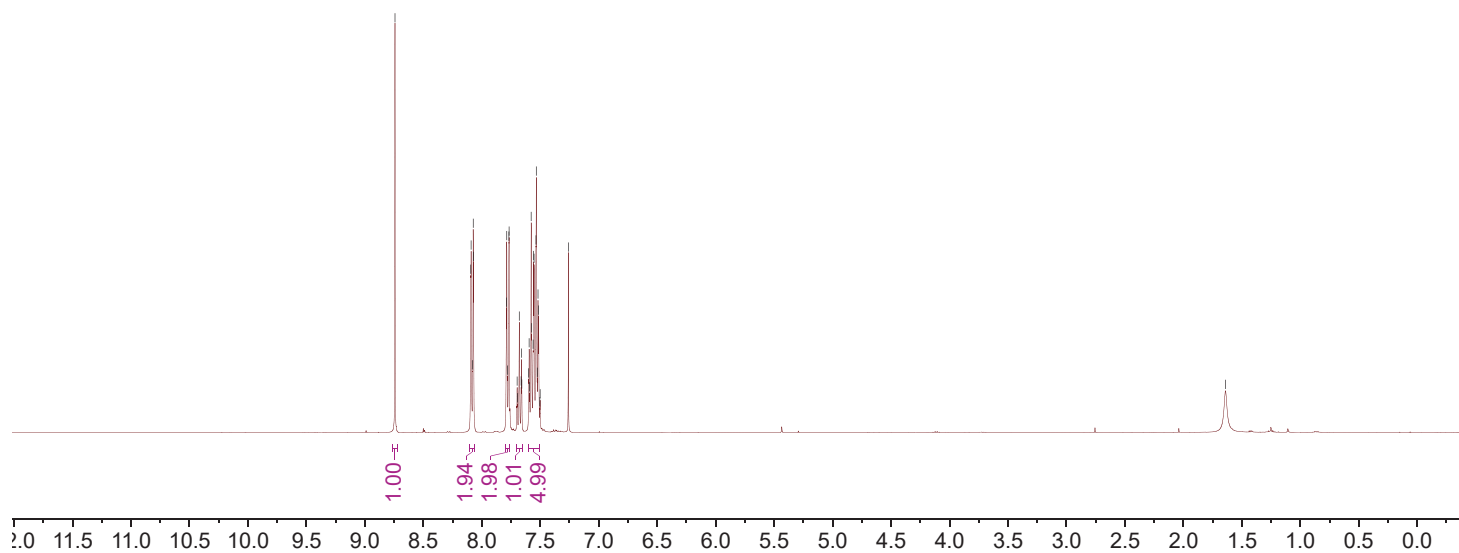

191.77

185.32

144.56

136.05

135.02

132.31

130.29

130.04

129.86

128.97

126.43

120.99

77.32

77.00

76.68

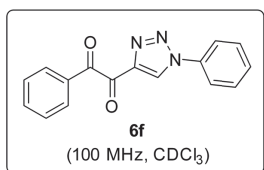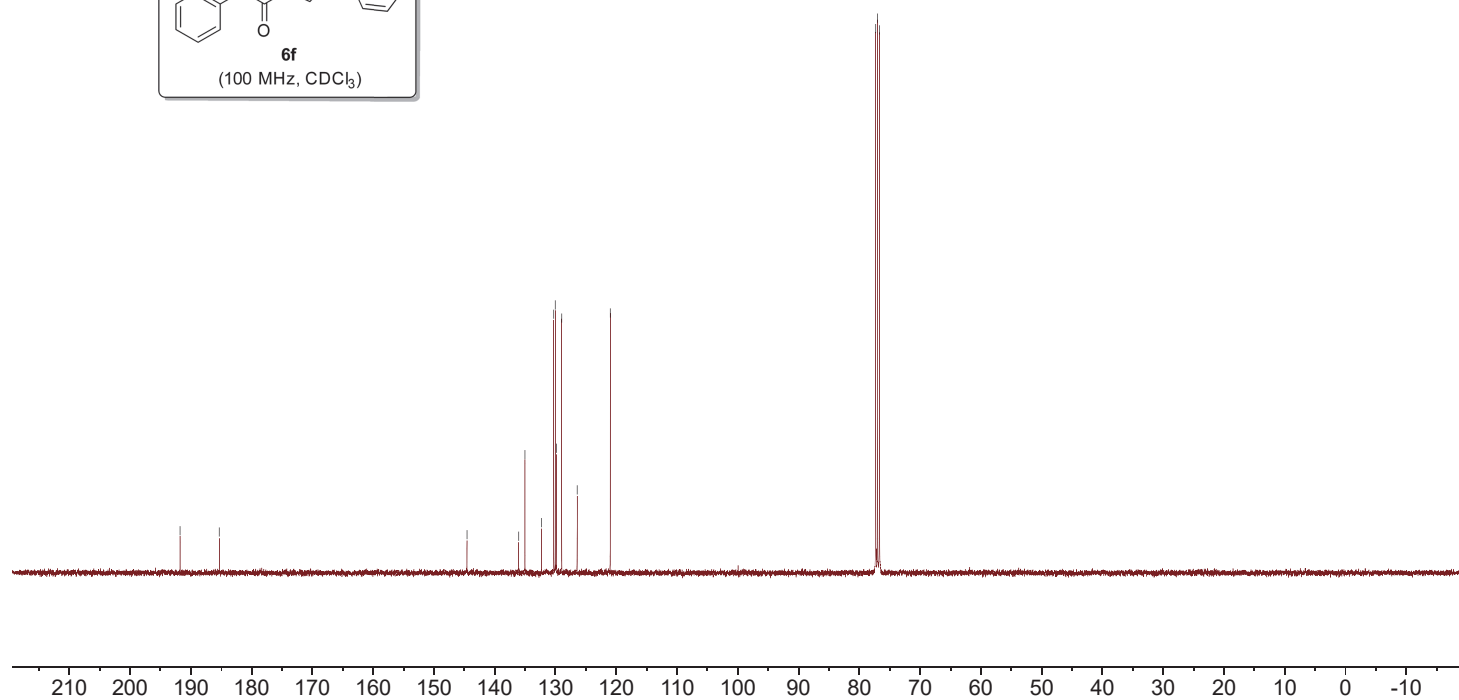

8.75  
8.06  
8.03  
7.79  
7.78  
7.77  
7.77  
7.61  
7.60  
7.60  
7.59  
7.57  
7.55  
7.54  
7.53  
7.51  
7.26

2.04  
1.62  
1.27  
1.26

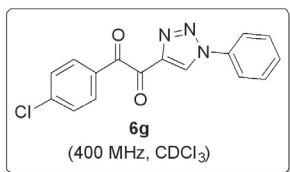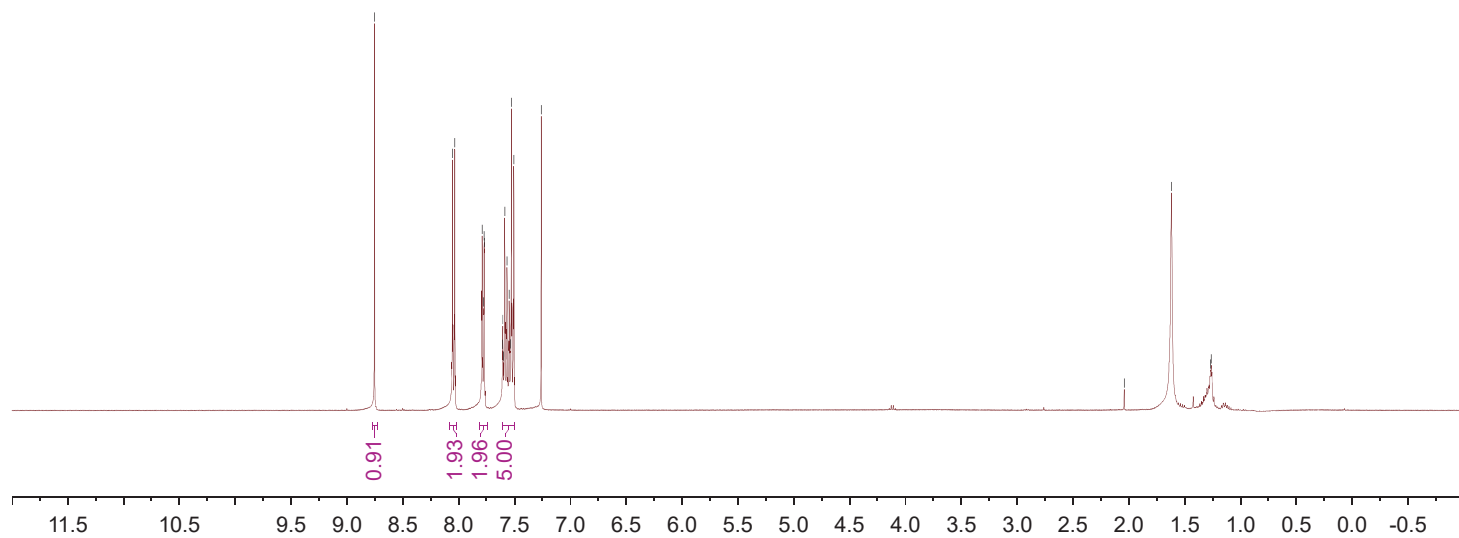

190.32  
184.68

144.40  
141.80  
131.63  
130.73  
130.07  
129.94  
129.41  
126.55  
121.02

77.32  
77.00  
76.68

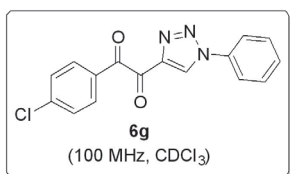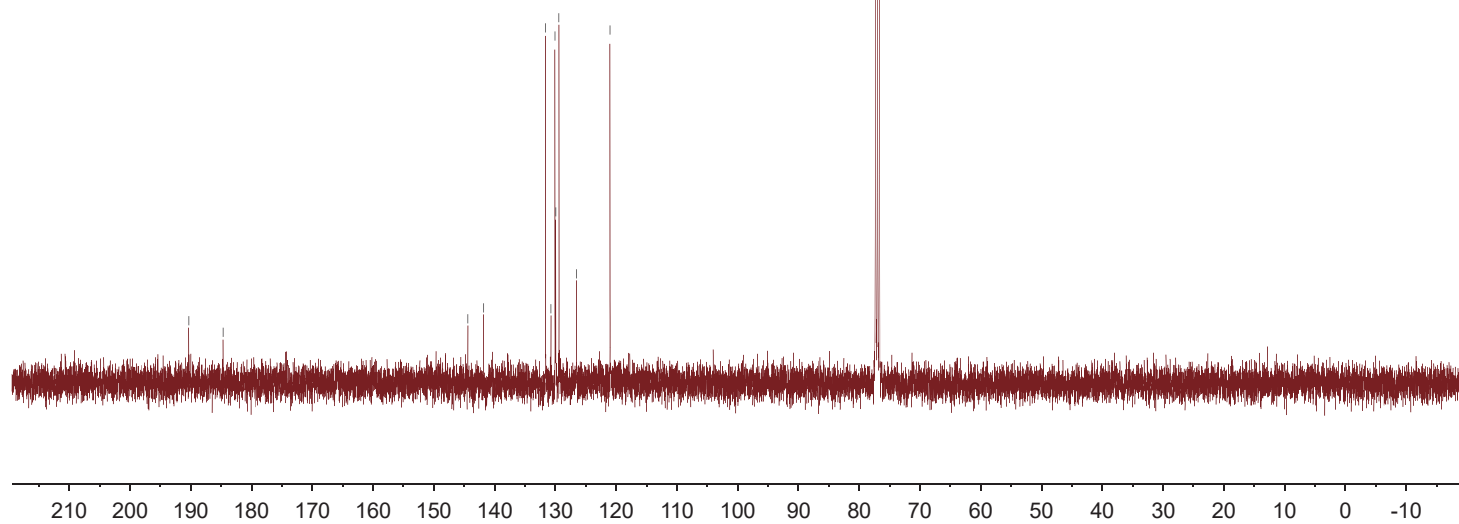



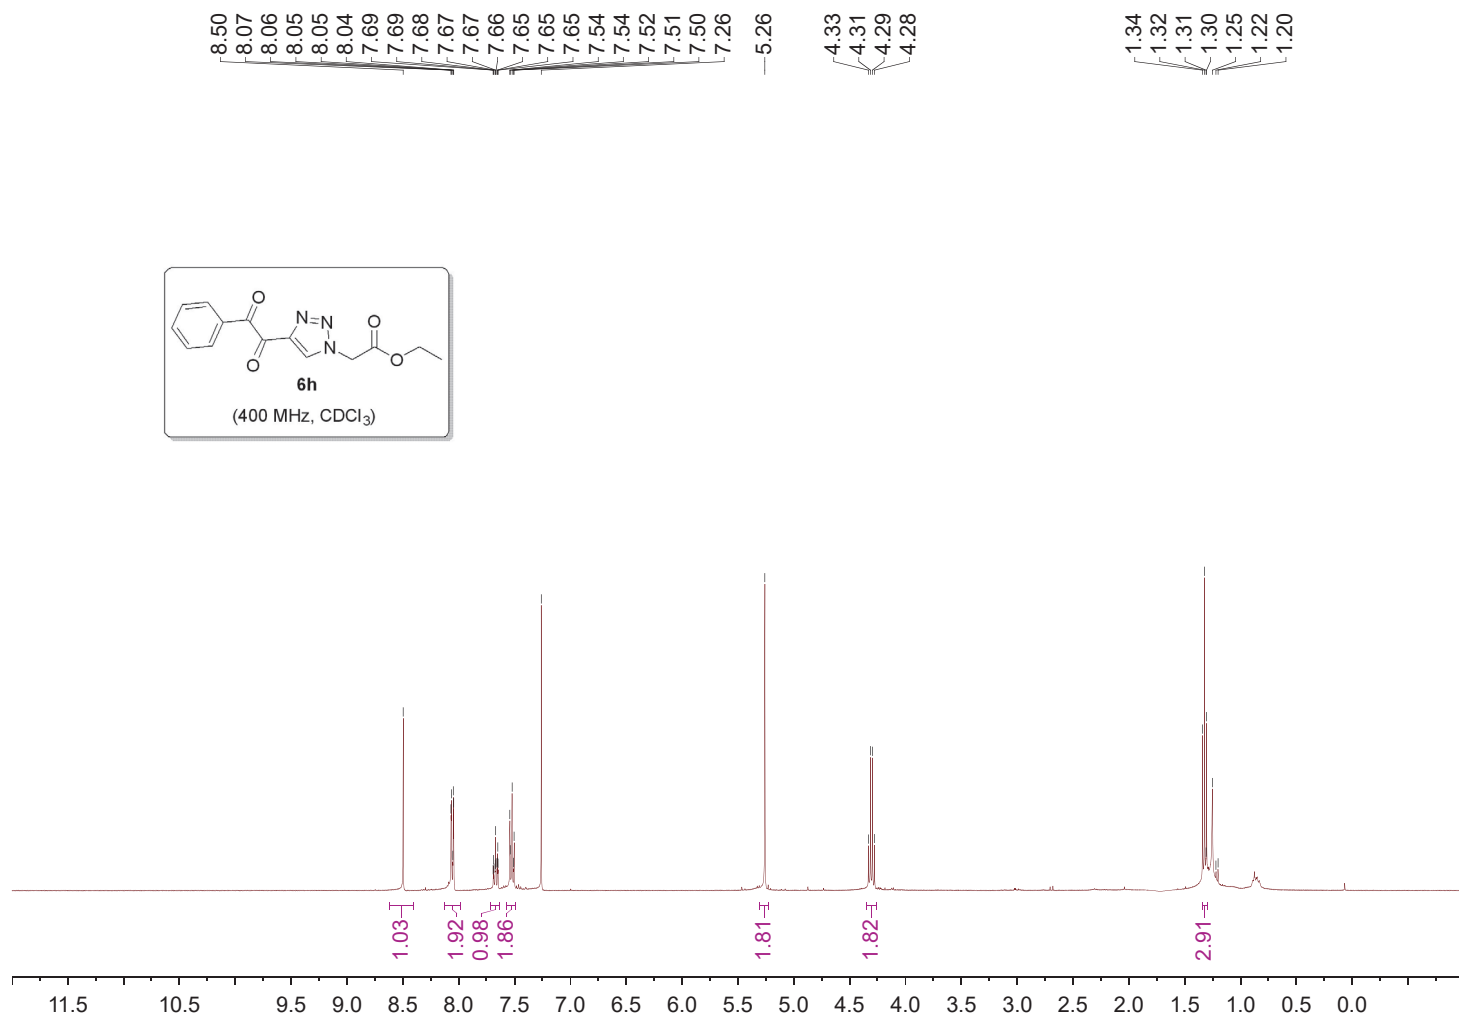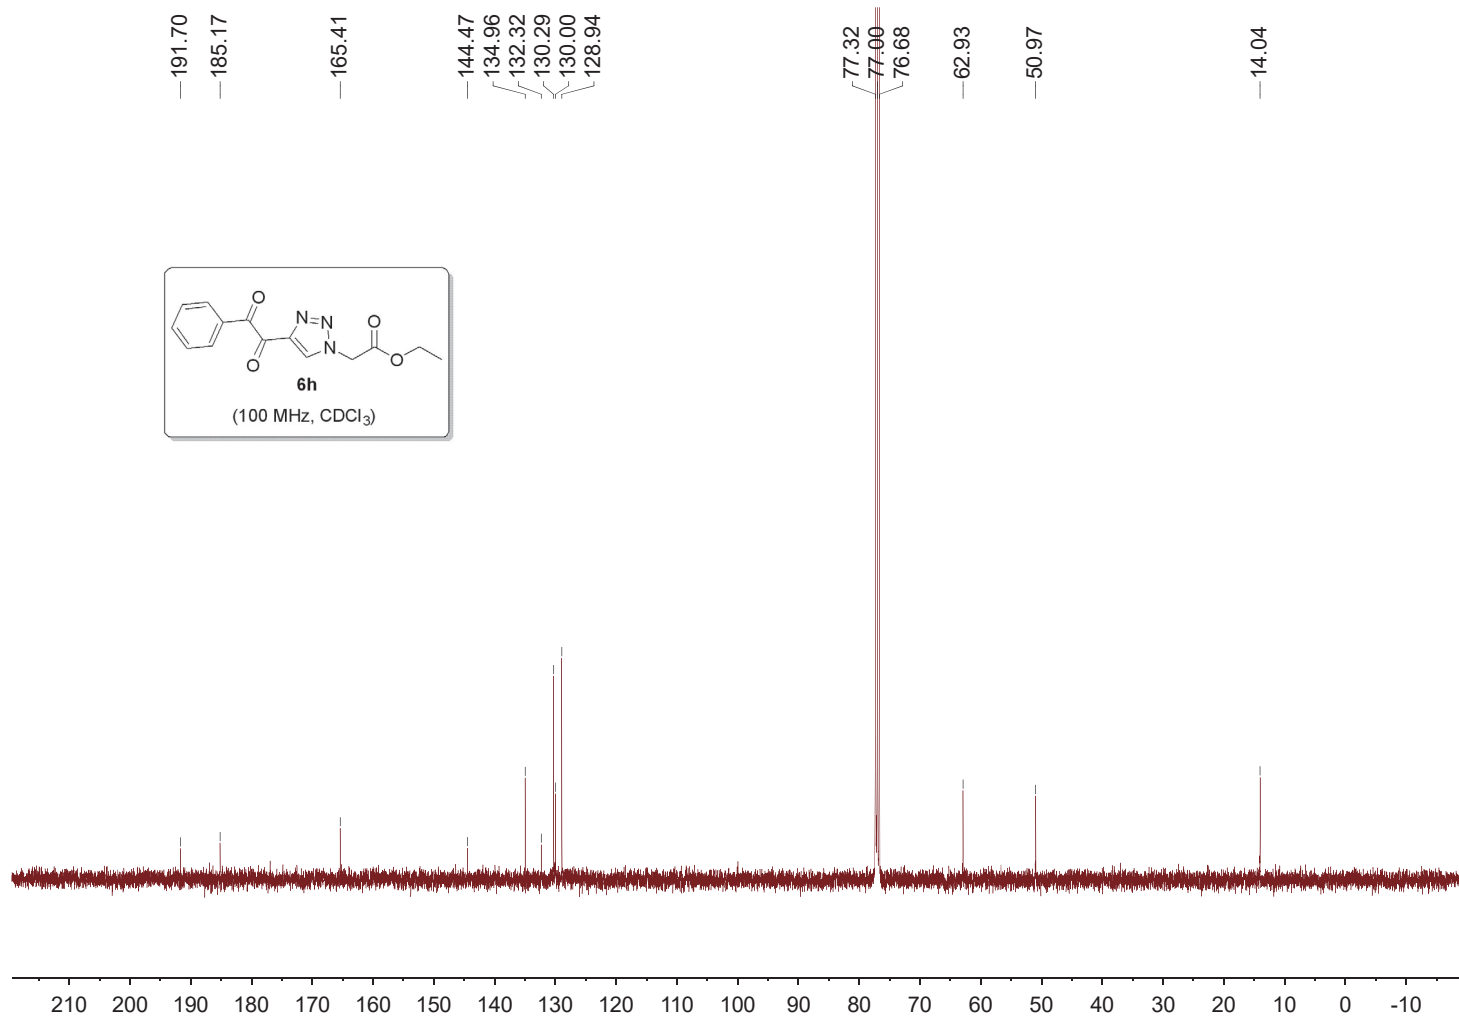

8.38  
8.10  
7.85  
7.40  
7.33  
7.26  
7.20  
7.20

5.62

1.62

0.01

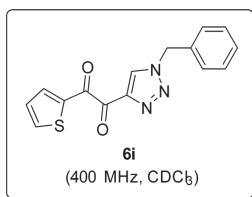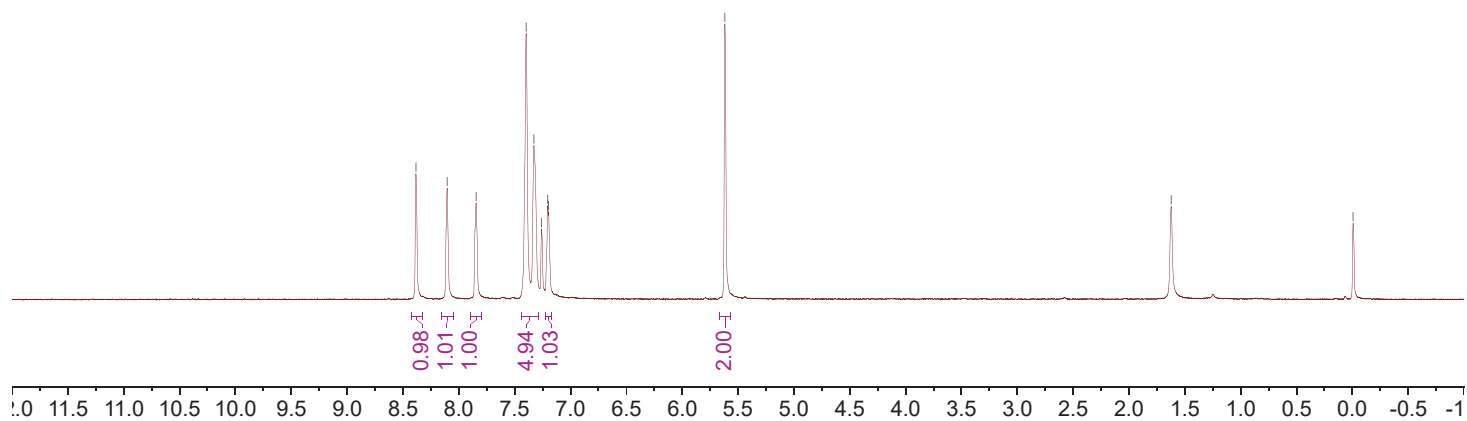

194.23

181.49

142.95  
138.19  
137.90  
137.65  
133.39  
129.73  
129.39  
129.28  
128.84  
128.36

77.32  
77.00  
76.68

54.51

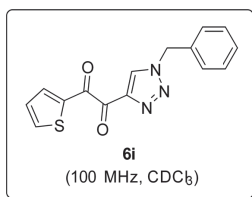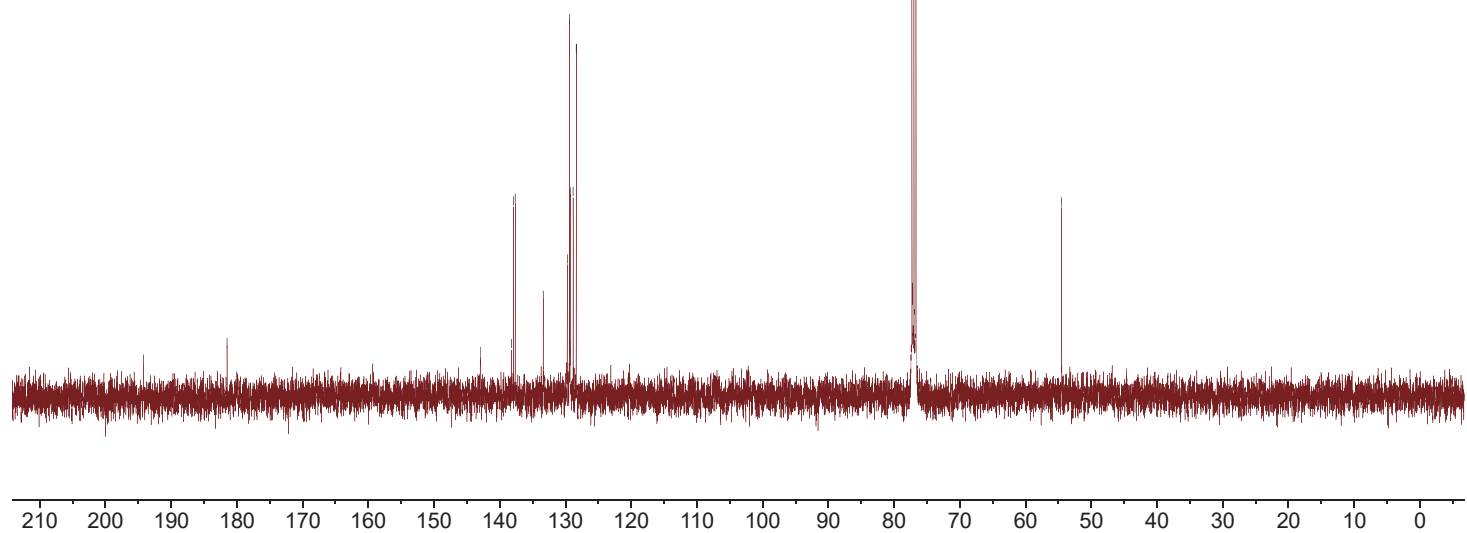

8.40  
7.76  
7.71  
7.38  
7.32  
7.26  
6.63  
5.61  
1.25  
-0.01

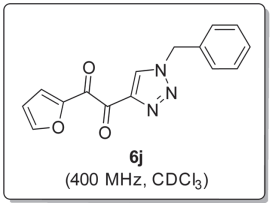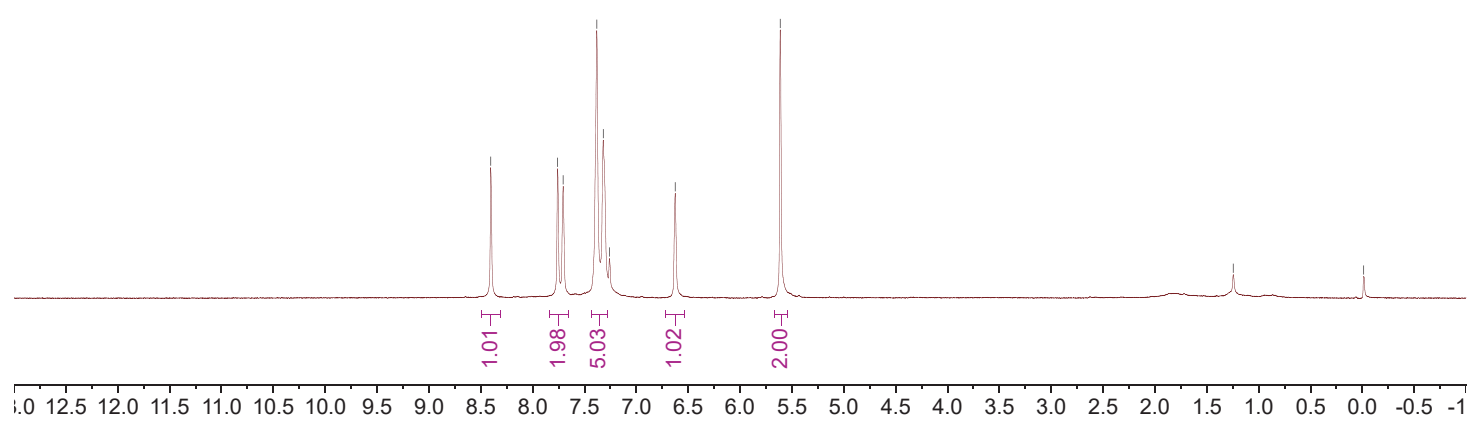

181.04  
176.73  
149.60  
149.13  
142.83  
133.42  
129.73  
129.34  
129.23  
128.33  
125.25  
113.22  
77.32  
77.00  
76.68  
54.47

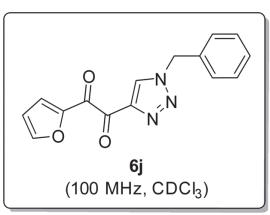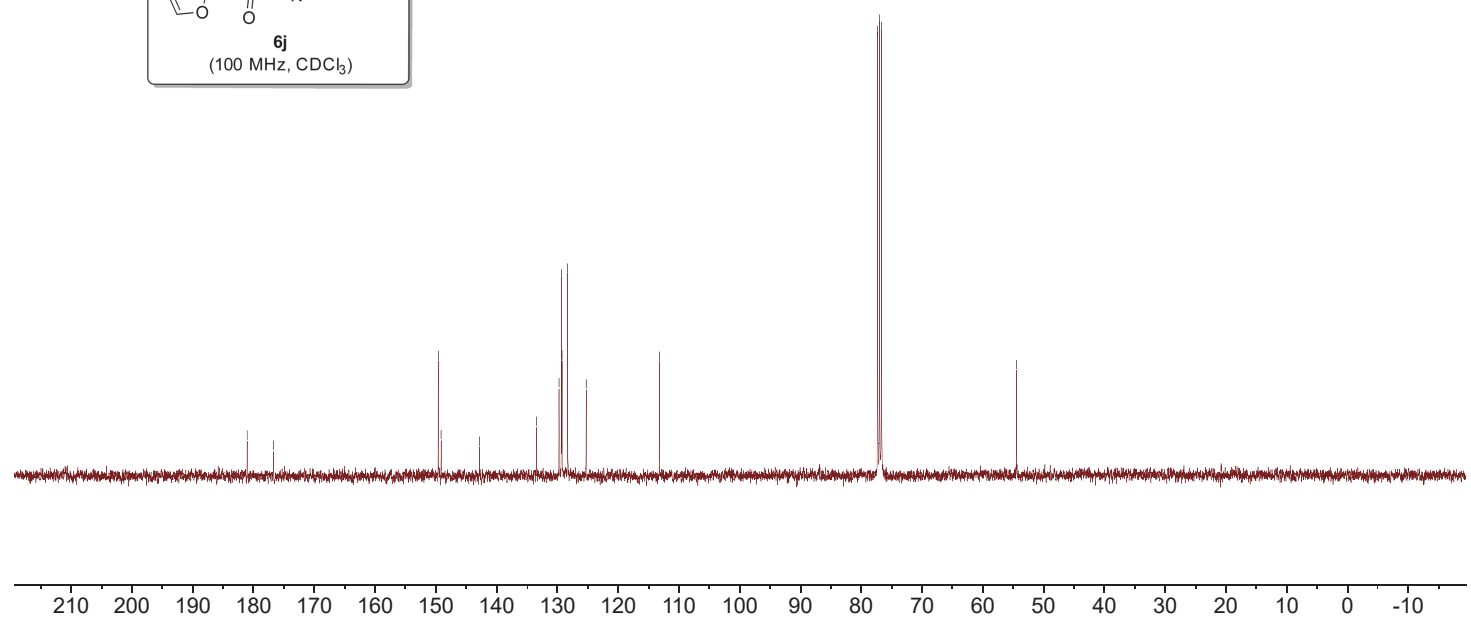

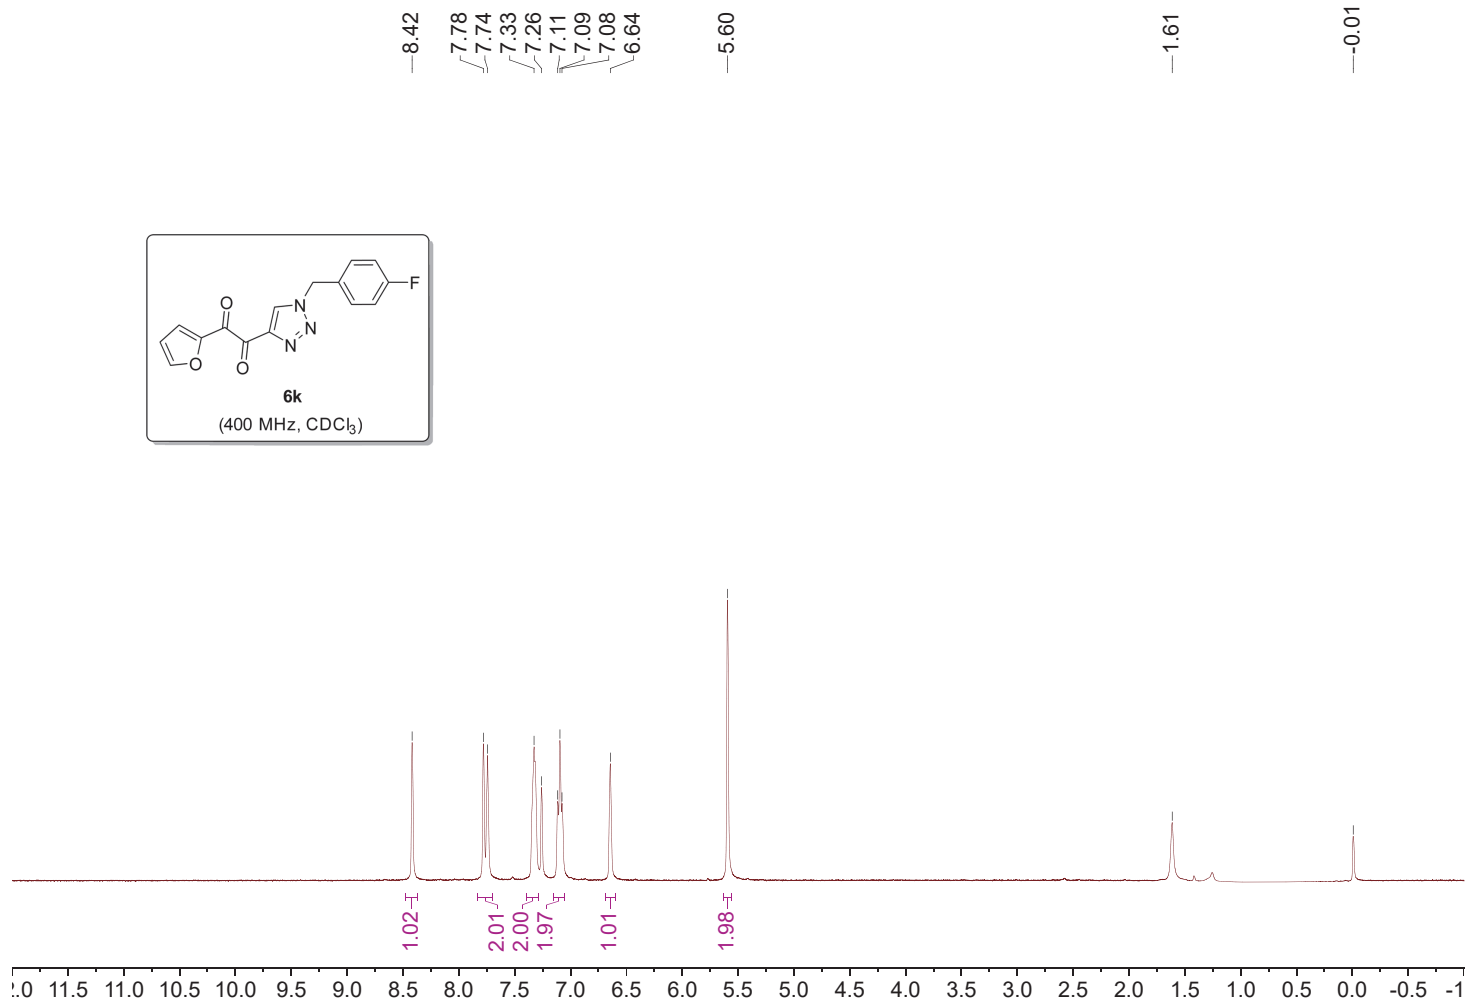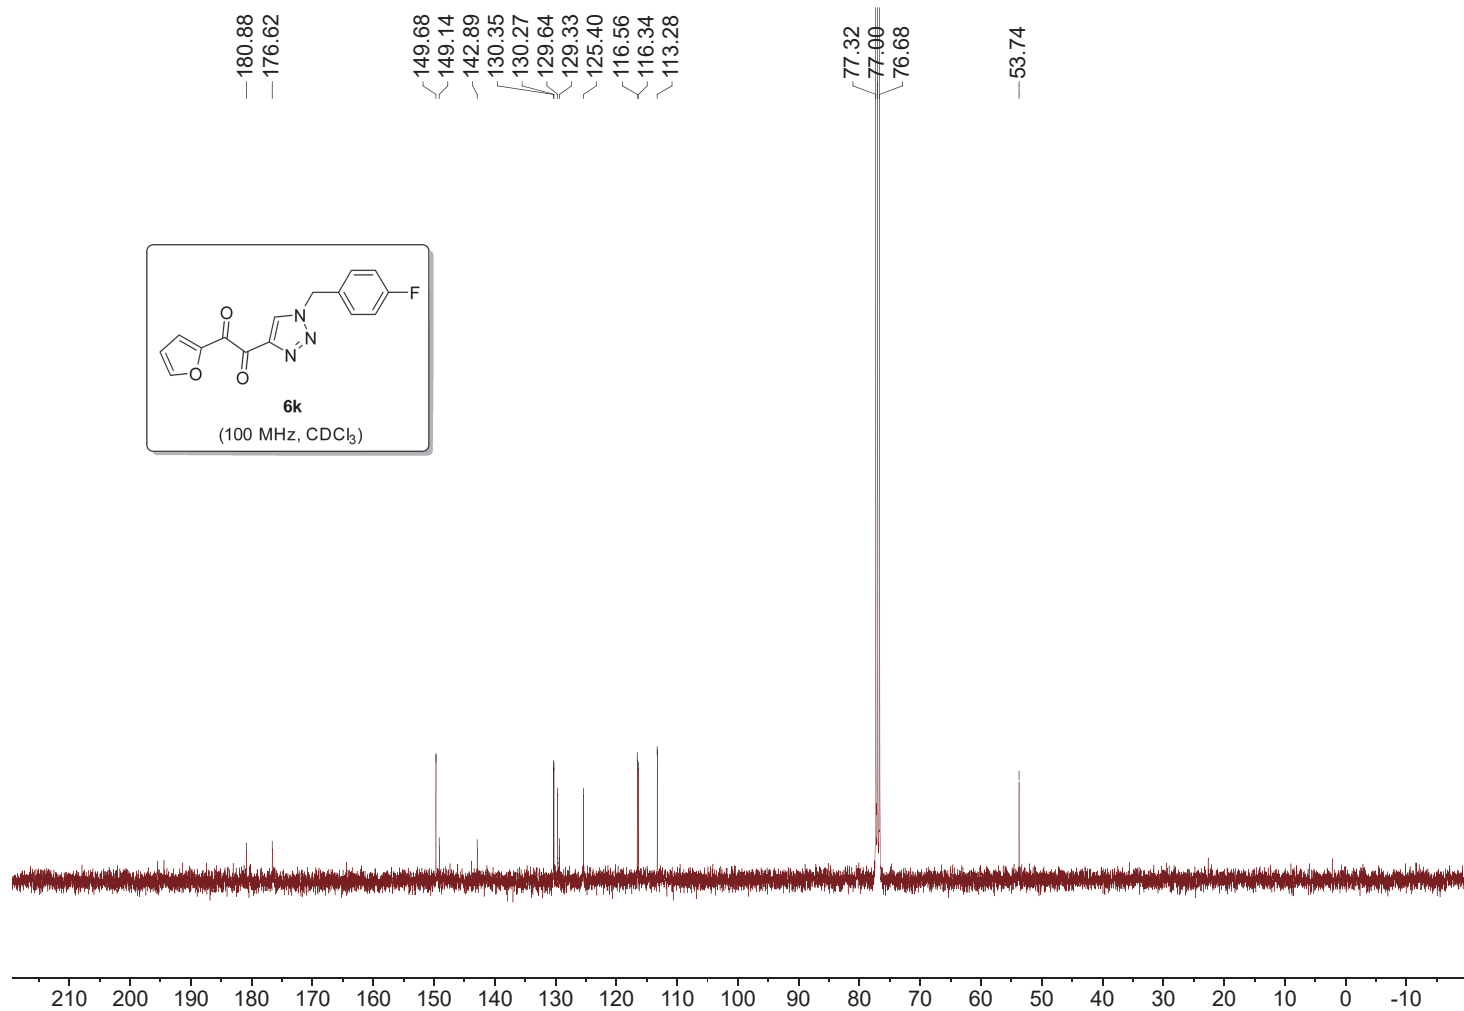

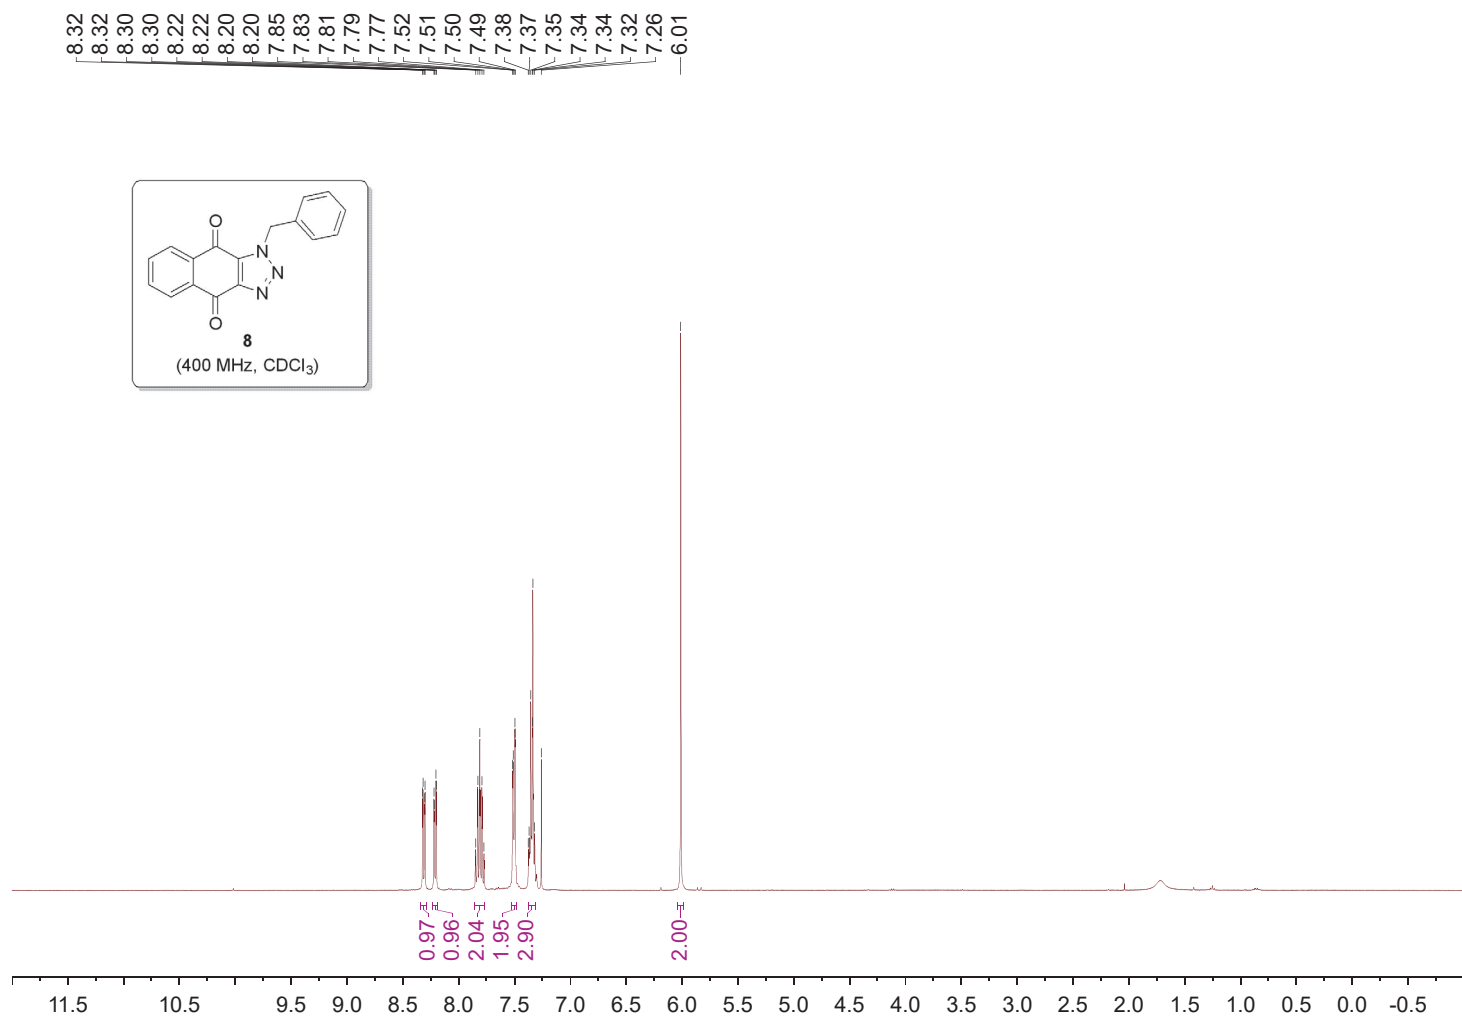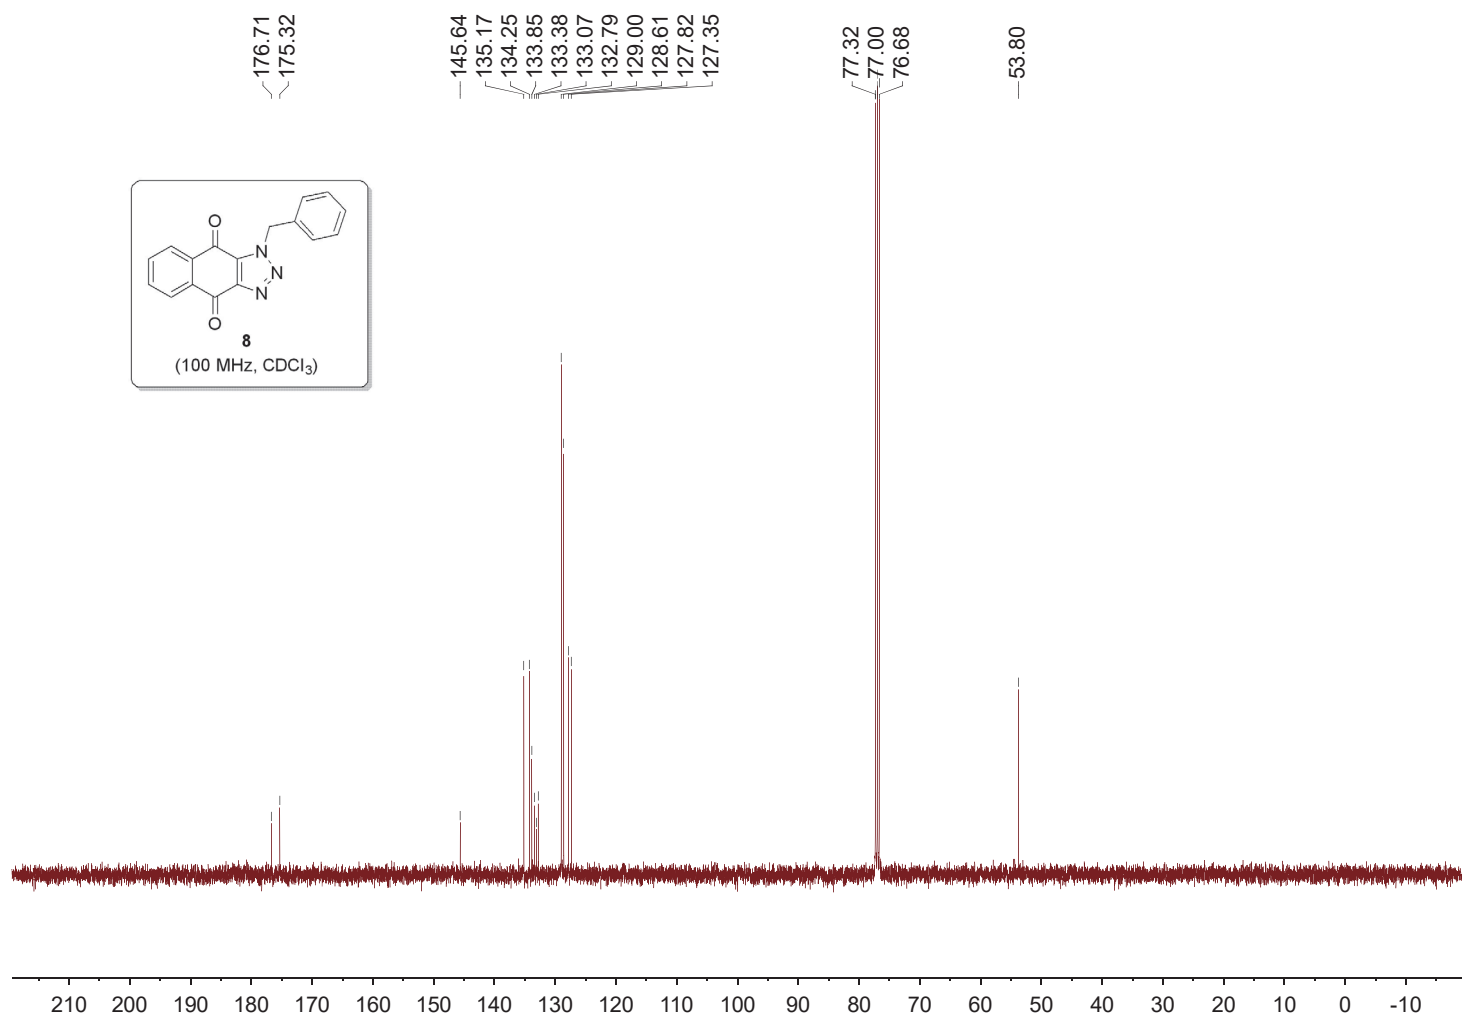

Supplement: d1cc06477k1.pdf [file d1cc06477k1.pdf]
